# Supplementary material for: USP8 Down-Regulation Promotes Parkin-Independent Mitophagy in the Drosophila Brain and in Human Neurons
Source: MDPI journal article supplement (doi:10.3390/cells12081143), 2023-04-13
Supplement: s1 [file s1]

### KEGG PATHWAY (USP8 down-regulating flies)

| Index | Name                                                 | p-value     | Adjusted p-value | Z-score | Combined score |
|-------|------------------------------------------------------|-------------|------------------|---------|----------------|
| 1     | Homologous recombination                             | 0.002971    | 0.03743          | -74.68  | 434.55         |
| 2     | Dorso-ventral axis formation                         | 0.0004092   | 0.008594         | -47.90  | 373.66         |
| 3     | Hedgehog signaling pathway                           | 0.01231     | 0.07754          | -61.20  | 269.11         |
| 4     | Glycolysis / Gluconeogenesis                         | 0.03123     | 0.1474           | -74.52  | 258.30         |
| 5     | Glycerolipid metabolism                              | 0.09940     | 0.2853           | -70.00  | 161.60         |
| 6     | AGE-RAGE signaling pathway in diabetic complications | 0.05870     | 0.1947           | -56.70  | 160.75         |
| 7     | FoxO signaling pathway                               | 0.009388    | 0.07393          | -33.05  | 154.28         |
| 8     | Phototransduction                                    | 0.000007766 | 0.0004893        | -12.60  | 148.22         |
| 9     | Mitophagy                                            | 0.07635     | 0.2405           | -50.05  | 128.75         |
| 10    | Fanconi anemia pathway                               | 0.03979     | 0.1474           | -30.98  | 99.90          |

### KEGG PATHWAY (WT flies)

| Index | Name                                        | p-value     | Adjusted p-value | Z-score      | Combined score |
|-------|---------------------------------------------|-------------|------------------|--------------|----------------|
| 1     | Amino sugar and nucleotide sugar metabolism | 0.008746616 | 0.107874936      | -65.87169767 | 312.1717947    |
| 2     | Glycerophospholipid metabolism              | 0.023585168 | 0.120622009      | -75.27081342 | 282.0500673    |
| 3     | Dorso-ventral axis formation                | 0.012207731 | 0.109553536      | -45.03592726 | 198.4141482    |
| 4     | Homologous recombination                    | 0.059470646 | 0.200037626      | -61.58662465 | 173.8142335    |
| 5     | DNA replication                             | 0.022325337 | 0.120622009      | -42.17468665 | 160.3495521    |
| 6     | Basal transcription factors                 | 0.029645301 | 0.121875124      | -43.60530696 | 153.4231648    |
| 7     | Longevity regulating pathway                | 0.069736187 | 0.206419112      | -56.96589503 | 151.7022247    |
| 8     | Fatty acid biosynthesis                     | 0.012251697 | 0.109553536      | -29.1351946  | 128.2557727    |
| 9     | Phototransduction                           | 4.44125E-05 | 0.003286528      | -12.59783696 | 126.2553775    |
| 10    | Selenocompound metabolism                   | 0.014804532 | 0.109553536      | -29.52368736 | 124.3780378    |
