# Supplementary material for: USP8 Down-Regulation Promotes Parkin-Independent Mitophagy in the Drosophila Brain and in Human Neurons
Source: Cells. 2023 Apr 13;12(8):1143. doi: 10.3390/cells12081143 (PMC10136645; doi:10.3390/cells12081143)
Supplement: Supplementary file 1 [file cells-12-01143-s001.zip]

Archive with 5 entries (5 files):
- cells-2201727 SM figures-main.pdf
- Supplementary excel file S1.xlsx
- Supplementary excel file S2.xlsx
- Supplementary excel file S3.xlsx
- Supplementary Table S1.pdf
