# Supplementary material for: USP8 Down-Regulation Promotes Parkin-Independent Mitophagy in the Drosophila Brain and in Human Neurons
Source: Cells. 2023 Apr 13;12(8):1143. doi: 10.3390/cells12081143 (PMC10136645; doi:10.3390/cells12081143)
Supplement: Supplementary file 1 [file cells-12-01143-s001.zip › Supplementary excel file S1.xlsx]

## Sheet: Ctrl_peptide liste
#	filename	z	score	SPI (%)	total Intensity	score VML	# Possible VM sites_K	# Actual VM Sites_k	# Localized VM sites_k	# Ambiguous VM sites_k	variable Sites	Start AA	previous aa	sequence	next aa	modifications	RT (Min)	parent m/z	matched parent mass	delta parent mass	delta parent mass ppm	# accession	entry_name
2	17K03_COLLAB-IT_CTRL_012.3050.3057.0	3	22.21	94.4	9450000	99	1	1	1	0	K1894k	1879	(K)	RQIEEAEEIAALNLAkFR	(K)	k:Ubiquitination-GG	18.9	739.07	2101.14	114.055	5.6	P05661	Myosin heavy chain, muscle
19	17K03_COLLAB-IT_CTRL_031.3197.3203.2	2	20	100	52600000	99	1	1	1	0	K1894k	1880	(R)	QIEEAEEIAALNLAkFR	(K)	k:Ubiquitination-GG	19.82	1030.02	1945.04	113.994	-23.9	P05661	Myosin heavy chain, muscle
29	17K03_COLLAB-IT_CTRL_022.3213.3213.0	3	19.66	92.3	18300000	99	1	1	1	0	K329k	313	(R)	RPLYNNIVLSGGSTMFkDFGR	(R)	k:Ubiquitination-GG	19.64	829.79	2372.22	115.138	440	P32392	Actin-related protein 3
30	17K03_COLLAB-IT_CTRL_021.3250.3259.2	2	19.6	100	103000000	99	1	1	1	0	K1894k	1880	(R)	QIEEAEEIAALNLAkFR	(K)	k:Ubiquitination-GG	19.8	1030.05	1945.04	114.054	5.3	P05661	Myosin heavy chain, muscle
43	17K03_COLLAB-IT_CTRL_011.3211.3217.2	2	19.1	100	34200000	99	1	1	1	0	K1894k	1880	(R)	QIEEAEEIAALNLAkFR	(K)	k:Ubiquitination-GG	20.04	1030.07	1945.04	114.094	24.7	P05661	Myosin heavy chain, muscle
46	17K03_COLLAB-IT_CTRL_031.3025.3030.0	3	18.89	90.8	20700000	99	1	1	1	0	K1894k	1879	(K)	RQIEEAEEIAALNLAkFR	(K)	k:Ubiquitination-GG	18.74	739.37	2101.14	114.955	411.8	P05661	Myosin heavy chain, muscle
61	17K03_COLLAB-IT_CTRL_023.2293.2296.0	2	18.52	93.2	716000000	99	1	1	1	0	K48k	43	(R)	LIFAGkQLEDGR	(T)	k:Ubiquitination-GG	14.13	731.04	1346.74	114.33	196.5	P18101	Ubiquitin-60S ribosomal protein L40
63	17K03_COLLAB-IT_CTRL_031.2259.2267.0	2	18.5	93.3	465000000	99	1	1	1	0	K48k	43	(R)	LIFAGkQLEDGR	(T)	k:Ubiquitination-GG	14.02	730.88	1346.74	114.01	-22.5	P18101	Ubiquitin-60S ribosomal protein L40
72	17K03_COLLAB-IT_CTRL_013.2768.2772.0	3	18.26	94.5	26400000	99	1	0	0	0	M289m	281	(R)	SYHIFYQImSGSVPGVK	(D)	m:Oxidized methionine	17.25	643.66	1912.96	16.0029	4.1	P05661	Myosin heavy chain, muscle
76	17K03_COLLAB-IT_CTRL_032.2793.2822.0	3	18.12	94.6	37300000	99	1	0	0	0	M289m	281	(R)	SYHIFYQImSGSVPGVK	(D)	m:Oxidized methionine	17.22	643.72	1912.96	16.1829	97.4	P05661	Myosin heavy chain, muscle
84	17K03_COLLAB-IT_CTRL_033.2637.2637.0	2	17.94	91.3	12000000	99	1	1	1	0	K721k	715	(K)	SLEVEVkNLSIR	(L)	k:Ubiquitination-GG	16.21	750.85	1386.8	113.898	-96.8	P35415	Paramyosin, long form
85	17K03_COLLAB-IT_CTRL_012.2785.2788.0	4	17.92	94.7	149000000	99	1	1	1	0	K63k	55	(R)	TLSDYNIQkESTLHLVLR	(L)	k:Ubiquitination-GG	17.24	562.09	2130.16	115.183	507.7	P18101	Ubiquitin-60S ribosomal protein L40
90	17K03_COLLAB-IT_CTRL_012.2291.2305.0	2	17.84	97.6	586000000	99	1	1	1	0	K48k	43	(R)	LIFAGkQLEDGR	(T)	k:Ubiquitination-GG	14.16	730.85	1346.74	113.95	-63.6	P18101	Ubiquitin-60S ribosomal protein L40
95	17K03_COLLAB-IT_CTRL_011.3140.3140.0	3	17.7	93.7	5800000	99	0	0	0	0	M267m	263	(R)	LHFFmPGFAPLTSR	(G)	m:Oxidized methionine	19.59	546.24	1620.84	15.8699	-76.4	Q24560	Tubulin beta-1 chain
99	17K03_COLLAB-IT_CTRL_021.1873.1892.0	4	17.58	92.2	24300000	99	1	1	1	0	K1102k	1093	(K)	LEDEQVVVLkHQR	(Q)	k:Ubiquitination-GG	11.58	427.68	1592.88	114.823	456.6	P05661	Myosin heavy chain, muscle
101	17K03_COLLAB-IT_CTRL_021.2379.2385.2	2	17.57	90.9	72100000	99	1	1	1	0	K1790k	1784	(K)	ALEQQIkELQVR	(L)	k:Ubiquitination-GG	14.69	784.94	1454.83	114.04	-1.8	P05661	Myosin heavy chain, muscle
105	17K03_COLLAB-IT_CTRL_021.2792.2800.0	4	17.52	94.9	319000000	99	1	1	1	0	K63k	55	(R)	TLSDYNIQkESTLHLVLR	(L)	k:Ubiquitination-GG	17.03	561.99	2130.16	114.783	329.6	P18101	Ubiquitin-60S ribosomal protein L40
113	17K03_COLLAB-IT_CTRL_023.3105.3105.0	3	17.29	85.3	21900000	99	1	1	1	0	K1894k	1879	(K)	RQIEEAEEIAALNLAkFR	(K)	k:Ubiquitination-GG	19.06	739.61	2101.14	115.675	736.4	P05661	Myosin heavy chain, muscle
116	17K03_COLLAB-IT_CTRL_012.2113.2141.0	3	17.24	90.3	17600000	99	1	1	1	0	K517k	517	(R)	kQTSIEIEQLNAR	(V)	k:Ubiquitination-GG	12.99	548.62	1529.83	114.017	-15.6	P35415	Paramyosin, long form
126	17K03_COLLAB-IT_CTRL_031.3164.3164.0	3	17.02	86.1	12200000	99	1	1	1	0	K329k	313	(R)	RPLYNNIVLSGGSTMFkDFGR	(R)	k:Ubiquitination-GG	19.61	829.47	2372.22	114.177	54.1	P32392	Actin-related protein 3
129	17K03_COLLAB-IT_CTRL_013.2384.2391.2	2	16.94	89.3	31900000	99	1	1	1	0	K1790k	1784	(K)	ALEQQIkELQVR	(L)	k:Ubiquitination-GG	14.8	784.91	1454.83	113.98	-40	P05661	Myosin heavy chain, muscle
133	17K03_COLLAB-IT_CTRL_032.2776.2788.0	4	16.87	91.6	210000000	99	1	1	1	0	K63k	55	(R)	TLSDYNIQkESTLHLVLR	(L)	k:Ubiquitination-GG	17.08	561.85	2130.16	114.223	80.2	P18101	Ubiquitin-60S ribosomal protein L40
166	17K03_COLLAB-IT_CTRL_032.2405.2412.2	2	15.99	89.7	79400000	99	1	1	1	0	K1790k	1784	(K)	ALEQQIkELQVR	(L)	k:Ubiquitination-GG	14.8	784.91	1454.83	113.98	-40	P05661	Myosin heavy chain, muscle
167	17K03_COLLAB-IT_CTRL_023.3626.3629.0	2	15.94	93.7	15300000	99	1	0	0	0	M194m	190	(K)	TVLImELINNVAK	(A)	m:Oxidized methionine	22.38	737.96	1457.84	17.0731	731	Q05825	ATP synthase subunit beta, mitochondrial
179	17K03_COLLAB-IT_CTRL_032.1917.1917.0	4	15.73	91.7	14600000	99	1	1	1	0	K1102k	1093	(K)	LEDEQVVVLkHQR	(Q)	k:Ubiquitination-GG	11.73	427.71	1592.88	114.943	526.8	P05661	Myosin heavy chain, muscle
184	17K03_COLLAB-IT_CTRL_013.2400.2419.0	2	15.61	91.5	13100000	99	1	1	1	0	K1278k	1278	(K)	kLSIENSDLLR	(Q)	k:Ubiquitination-GG	14.9	701.36	1287.73	113.986	-40.6	P05661	Myosin heavy chain, muscle
187	17K03_COLLAB-IT_CTRL_022.2851.2851.0	3	15.6	91.3	50300000	99	1	0	0	0	M289m	281	(R)	SYHIFYQImSGSVPGVK	(D)	m:Oxidized methionine	17.44	643.7	1912.96	16.1229	66.3	P05661	Myosin heavy chain, muscle
191	17K03_COLLAB-IT_CTRL_021.1445.1445.2	2	15.52	88.2	3440000	99	1	1	1	0	K372k	357	(K)	SSDAQSQATASEAESkA	(-)	k:Ubiquitination-GG	8.88	891.37	1667.74	113.997	-25.6	P06002	Opsin Rh1
203	17K03_COLLAB-IT_CTRL_031.2833.2833.0	3	15.21	88.2	11400000	99	1	1	1	0	K387k	382	(K)	VFAEQkAIFGDNMLR	(D)	k:Ubiquitination-GG	17.54	618.32	1738.89	114.051	4.3	Q9V3S0	Cytochrome P450 4g1
205	17K03_COLLAB-IT_CTRL_012.1917.1917.0	3	15.19	96.2	21900000	99	1	1	1	0	K1102k	1093	(K)	LEDEQVVVLkHQR	(Q)	k:Ubiquitination-GG	11.75	569.66	1592.88	114.09	27.6	P05661	Myosin heavy chain, muscle
212	17K03_COLLAB-IT_CTRL_012.3195.3195.0	3	15.12	78.3	6250000	99	1	1	1	0	K329k	313	(R)	RPLYNNIVLSGGSTMFkDFGR	(R)	k:Ubiquitination-GG	19.85	830.1	2372.22	116.067	813.6	P32392	Actin-related protein 3
219	17K03_COLLAB-IT_CTRL_023.2442.2442.0	3	14.97	89.8	12900000	99	1	1	1	0	K1278k	1278	(K)	kLSIENSDLLR	(Q)	k:Ubiquitination-GG	15.04	468.26	1287.73	115.039	709.9	P05661	Myosin heavy chain, muscle
220	17K03_COLLAB-IT_CTRL_023.1987.1987.0	3	14.95	79.8	3110000	99	2	2	2	0	K137k K138k	129	(R)	APGGSGVDkkGDVGPGAGEVEFR	(G)	k:Ubiquitination-GG	12.15	805.35	2186.08	227.952	-55.5	Q9VWG3	40S ribosomal protein S10b
225	17K03_COLLAB-IT_CTRL_033.3584.3603.0	2	14.8	77.9	7960000	99	1	0	0	0	M194m	190	(K)	TVLImELINNVAK	(A)	m:Oxidized methionine	22.22	737.44	1457.84	16.0331	25.9	Q05825	ATP synthase subunit beta, mitochondrial
230	17K03_COLLAB-IT_CTRL_013.2608.2614.0	2	14.7	87.1	10500000	99	1	1	1	0	K721k	715	(K)	SLEVEVkNLSIR	(L)	k:Ubiquitination-GG	16.21	750.94	1386.8	114.078	23.1	P35415	Paramyosin, long form
237	17K03_COLLAB-IT_CTRL_021.1493.1493.0	3	14.62	93.9	2770000	99	1	1	1	0	K1897k	1897	(R)	kAQQELEEAEER	(A)	k:Ubiquitination-GG	9.18	525.52	1459.7	114.843	508.2	P05661	Myosin heavy chain, muscle
248	17K03_COLLAB-IT_CTRL_031.2406.2406.2	2	14.41	92.9	16000000	99	1	1	1	0	K1278k	1278	(K)	kLSIENSDLLR	(Q)	k:Ubiquitination-GG	14.88	701.48	1287.73	114.226	130.6	P05661	Myosin heavy chain, muscle
249	17K03_COLLAB-IT_CTRL_012.3191.3202.0	3	14.36	80.7	16100000	99	1	1	1	0	K258k	241	(K)	EMPLGSTPYQAYSDFLSkPTPR	(L)	k:Ubiquitination-GG	19.82	867.09	2485.21	114.049	2.2	P31009	40S ribosomal protein S2
257	17K03_COLLAB-IT_CTRL_021.3540.3540.0	3	14.23	88.6	22900000	99	1	1	1	0	K96k	84	(K)	VVDMIDVEDIAEkAAFCR	(C)	C:Carbamidomethylation,k:Ubiquitination-GG	21.65	733.16	2081	116.461	1100.5	Q9VAM6	CDGSH iron-sulfur domain-containing protein 2 homolog
270	17K03_COLLAB-IT_CTRL_033.3148.3148.0	3	13.98	90.9	8220000	99	0	0	0	0	M267m	263	(R)	LHFFmPGFAPLTSR	(G)	m:Oxidized methionine	19.41	546.23	1620.84	15.8399	-94.7	Q24560	Tubulin beta-1 chain
271	17K03_COLLAB-IT_CTRL_021.2088.2098.0	3	13.96	75.7	26100000	99	1	1	1	0	K517k	517	(R)	kQTSIEIEQLNAR	(V)	k:Ubiquitination-GG	12.93	548.6	1529.83	113.957	-52.1	P35415	Paramyosin, long form
285	17K03_COLLAB-IT_CTRL_012.3597.3597.0	2	13.76	86.8	8910000	99	1	0	0	0	M194m	190	(K)	TVLImELINNVAK	(A)	m:Oxidized methionine	22.51	738.28	1457.84	17.7131	1164.4	Q05825	ATP synthase subunit beta, mitochondrial
288	17K03_COLLAB-IT_CTRL_011.2301.2329.0	3	13.73	93.9	26800000	99	1	1	1	0	K562k	558	(R)	EFLFkQRPESLPASR	(K)	k:Ubiquitination-GG	14.32	640.23	1804.97	113.705	-176.1	A1ZAI5	Putative fatty acyl-CoA reductase CG5065
289	17K03_COLLAB-IT_CTRL_013.2325.2325.0	3	13.67	89.1	9720000	99	1	1	1	0	K1261k	1250	(K)	QLQHTLNEVQSkLDETNR	(T)	k:Ubiquitination-GG	14.44	756.81	2153.09	115.321	563.4	P05661	Myosin heavy chain, muscle
291	17K03_COLLAB-IT_CTRL_031.4579.4579.0	5	13.66	84.4	10800000	99	2	2	2	0	K432k K449k	412	(R)	EFSERDLEAIVMINAEPNSFkLLVQSIAPEVYGHELPk	(A)	k:Ubiquitination-GG	28.56	908.76	4313.22	226.555	-337.3	Q9VF30	DNA replication licensing factor REC
297	17K03_COLLAB-IT_CTRL_032.2524.2524.0	3	13.61	92.6	13500000	99	1	1	1	0	K176k	166	(K)	SFVPTFVDHSkAVVAR	(M)	k:Ubiquitination-GG	15.53	625.38	1759.95	114.177	71.3	Q9V3S0	Cytochrome P450 4g1
316	17K03_COLLAB-IT_CTRL_011.2131.2131.0	3	13.26	83.5	4890000	99	1	1	1	0	K1484k	1483	(R)	LkGAYEEGQEQLEAVR	(R)	k:Ubiquitination-GG	13.16	645.2	1819.92	113.667	-194.4	P05661	Myosin heavy chain, muscle
324	17K03_COLLAB-IT_CTRL_011.3506.3506.0	3	13.08	82.7	6770000	99	1	1	1	0	K96k	84	(K)	VVDMIDVEDIAEkAAFCR	(C)	C:Carbamidomethylation,k:Ubiquitination-GG	21.99	733	2081	115.981	882.3	Q9VAM6	CDGSH iron-sulfur domain-containing protein 2 homolog
342	17K03_COLLAB-IT_CTRL_013.1973.1973.0	4	12.84	84.6	4500000	99	2	2	2	0	K137k K138k	129	(R)	APGGSGVDkkGDVGPGAGEVEFR	(G)	k:Ubiquitination-GG	12.19	604.52	2186.08	228.975	368	Q9VWG3	40S ribosomal protein S10b
352	17K03_COLLAB-IT_CTRL_031.2309.2309.0	3	12.72	87.3	16900000	99	1	1	1	0	K562k	558	(R)	EFLFkQRPESLPASR	(K)	k:Ubiquitination-GG	14.33	640.69	1804.97	115.085	542.7	A1ZAI5	Putative fatty acyl-CoA reductase CG5065
353	17K03_COLLAB-IT_CTRL_022.3206.3206.0	3	12.7	73.2	40400000	99	1	1	1	0	K258k	241	(K)	EMPLGSTPYQAYSDFLSkPTPR	(L)	k:Ubiquitination-GG	19.6	867.15	2485.21	114.229	71.5	P31009	40S ribosomal protein S2
354	17K03_COLLAB-IT_CTRL_033.3188.3188.0	3	12.69	76	19200000	99	1	1	1	0	K258k	241	(K)	EMPLGSTPYQAYSDFLSkPTPR	(L)	k:Ubiquitination-GG	19.66	867.05	2485.21	113.929	-44	P31009	40S ribosomal protein S2
359	17K03_COLLAB-IT_CTRL_021.2153.2153.0	3	12.61	86	20000000	99	1	1	1	0	K74k	71	(R)	FITkIYHPNIDR	(L)	k:Ubiquitination-GG	13.37	544.34	1516.83	114.178	83	P35128	Ubiquitin-conjugating enzyme E2 N
370	17K03_COLLAB-IT_CTRL_012.2974.2974.2	2	12.33	75.4	4570000	99	0	0	0	0	M92m	83	(R)	VYYLSLEYYmGR	(S)	m:Oxidized methionine	18.43	787.41	1556.74	17.0673	681.4	Q9XTL9	Glycogen phosphorylase
372	17K03_COLLAB-IT_CTRL_013.2406.2414.2	2	12.28	82.7	10900000	99	1	1	1	0	K94k	93	(K)	DkWSPALQIR	(T)	k:Ubiquitination-GG	14.93	664.89	1213.67	115.104	798.5	P35128	Ubiquitin-conjugating enzyme E2 N
373	17K03_COLLAB-IT_CTRL_023.2902.2902.0	3	12.27	83.4	11600000	99	1	1	1	0	K387k	382	(K)	VFAEQkAIFGDNMLR	(D)	k:Ubiquitination-GG	17.82	618.7	1738.89	115.191	619.2	Q9V3S0	Cytochrome P450 4g1
377	17K03_COLLAB-IT_CTRL_031.2032.2032.0	3	12.23	88.8	1640000	99	1	1	1	0	K543k	504	(R)	VEQASANTQTAQVDTVSTSTSTTSVTTNSVGTSPAAPDDkR	(T)	k:Ubiquitination-GG	12.52	1409.4	4110.95	115.231	281.1	P14199	Protein ref(2)P
383	17K03_COLLAB-IT_CTRL_013.3803.3803.0	4	12.1	77.2	6320000	99	2	2	2	0	K1502k K1509k	1500	(R)	ENkNLADEVkDLLDQIGEGGR	(N)	k:Ubiquitination-GG	23.8	636.51	2313.17	229.85	693.8	P05661	Myosin heavy chain, muscle
393	17K03_COLLAB-IT_CTRL_021.2028.2028.0	3	12.01	86.2	1300000	99	1	1	1	0	K543k	504	(R)	VEQASANTQTAQVDTVSTSTSTTSVTTNSVGTSPAAPDDkR	(T)	k:Ubiquitination-GG	12.55	1409.5	4110.95	115.531	352.1	P14199	Protein ref(2)P
396	17K03_COLLAB-IT_CTRL_033.2783.2790.0	3	11.94	78.3	279000000	99	1	1	1	0	K158k	138	(R)	SQSPPASVGSVSFSSPAQQRk	(L)	k:Ubiquitination-GG	17.14	748.93	2132.07	112.702	-597.2	P22807	Homeobox protein slou
400	17K03_COLLAB-IT_CTRL_012.2346.2346.0	5	11.87	71.4	10200000	99	1	0	0	0	M399m	372	(K)	IFNNQEFAQLLSQSVNNGFEAVYELTKmCTIR	(M)	C:Carbamidomethylation,m:Oxidized methionine	14.49	756.81	3764.84	15.1798	-215.6	P42003	Protein mothers against dpp
401	17K03_COLLAB-IT_CTRL_012.4095.4095.2	2	11.87	81.3	4710000	99	1	1	1	0	K1509k	1503	(K)	NLADEVkDLLDQIGEGGR	(N)	k:Ubiquitination-GG	25.65	1028.6	1941.99	114.205	78.9	P05661	Myosin heavy chain, muscle
402	17K03_COLLAB-IT_CTRL_033.2368.2368.0	4	11.86	88.4	7770000	99	1	1	1	0	K1261k	1250	(K)	QLQHTLNEVQSkLDETNR	(T)	k:Ubiquitination-GG	14.49	567.53	2153.09	114.004	-17.3	P05661	Myosin heavy chain, muscle
407	17K03_COLLAB-IT_CTRL_032.4275.4297.0	5	11.75	80.8	9570000	99	2	0	0	0	M356m	337	(R)	KYSVWIGGSILASLSTFQQmWISKQEYDESGPGIVHR	(K)	m:Oxidized methionine	26.61	844.08	4198.11	18.2643	538.2	P02574	Actin, larval muscle
409	17K03_COLLAB-IT_CTRL_021.3453.3460.0	3	11.71	92.4	45200000	99	1	0	0	0	M106m	94	(R)	KAPPSYSDGVYAmAGANRPSTR	(R)	m:Oxidized methionine	21.11	772.17	2296.11	18.3816	1031.2	Q9VQH2	Dual oxidase
410	17K03_COLLAB-IT_CTRL_011.3142.3147.0	3	11.69	75.4	4830000	99	1	1	1	0	K46k	44	(K)	FPkFAEIVQLR	(L)	k:Ubiquitination-GG	19.6	487.91	1347.78	113.937	-72.4	P31409	V-type proton ATPase subunit B
411	17K03_COLLAB-IT_CTRL_022.2500.2500.0	3	11.69	77	14100000	99	0	0	0	0	M181m	163	(R)	TAGLGILPAGGVRSVPSLmR	(F)	m:Oxidized methionine	15.36	657.47	1952.11	18.2845	1162	Q7JW27	WASH complex subunit 1
414	17K03_COLLAB-IT_CTRL_031.3050.3056.0	4	11.67	70.1	19300000	99	2	2	2	0	K652k K666k	649	(K)	DQQkLSLVNQAQFLLLNkSSVR	(S)	k:Ubiquitination-GG	18.89	689.73	2529.41	226.483	-581.5	Q9VRA2	Molybdenum cofactor sulfurase
421	17K03_COLLAB-IT_CTRL_023.2998.3004.0	4	11.59	82.9	52700000	99	1	1	1	0	M1m K20k	1	(-)	mSLEVSNINGGNGTQLSHDkR	(E)	m:Oxidized methionine,kUbiquitination-GG	18.4	597.81	2257.1	131.119	452.8	P49846	Transcription initiation factor TFIID subunit 5
422	17K03_COLLAB-IT_CTRL_032.1821.1826.0	5	11.58	74.2	7460000	99	0	0	0	0	M489m	470	(K)	RVQLPEGTQIIVNIGSVDImR	(G)	m:Oxidized methionine	11.12	471.83	2338.29	16.8298	354.5	P25158	Maternal effect protein oskar
430	17K03_COLLAB-IT_CTRL_032.3150.3150.3	3	11.5	79.1	8800000	99	1	1	1	0	K46k	44	(K)	FPkFAEIVQLR	(L)	k:Ubiquitination-GG	19.45	488.46	1347.78	115.587	1055.2	P31409	V-type proton ATPase subunit B
434	17K03_COLLAB-IT_CTRL_033.1885.1892.0	5	11.44	69	7450000	99	2	2	2	0	M722m K731k K733k M741m	713	(K)	CTLVNYSTAmACVVCGGSkLkSISSIEDmTLR	(K)	C:Carbamidomethylation,m:Oxidized methionine,kUbiquitination-GG	11.43	763.28	3551.7	260.667	155.2	P27398	Calpain-D
437	17K03_COLLAB-IT_CTRL_023.4653.4653.0	5	11.41	87.9	4730000	99	2	2	2	0	K432k K449k	412	(R)	EFSERDLEAIVMINAEPNSFkLLVQSIAPEVYGHELPk	(A)	k:Ubiquitination-GG	28.85	909.16	4313.22	228.555	103.2	Q9VF30	DNA replication licensing factor REC
439	17K03_COLLAB-IT_CTRL_023.2066.2066.0	5	11.38	75.9	7080000	99	1	0	0	0	M1340m	1320	(R)	SSASSGRGGSGVPGGSGGSGmPGPSAGSGSSWK	(S)	m:Oxidized methionine	12.65	563.02	2794.24	16.8264	295.8	Q9I7S6	High affinity cGMP-specific 3',5'-cyclic phosphodiesterase 9A
446	17K03_COLLAB-IT_CTRL_021.3190.3190.3	3	11.22	65.8	34500000	99	0	0	0	0	M267m	263	(R)	LHFFmPGFAPLTSR	(G)	m:Oxidized methionine	19.41	546.86	1620.84	17.7299	1058.9	Q24560	Tubulin beta-1 chain
450	17K03_COLLAB-IT_CTRL_011.3079.3079.0	5	11.12	76	11800000	99	1	1	1	0	K730k	692	(K)	LQEIQDELPAAAQLDTSNSSDEAVSMSNTSPSESSTEQk	(S)	k:Ubiquitination-GG	19.21	848.11	4124.86	111.664	-561.6	Q9VCU9	Endoribonuclease Dcr-1
452	17K03_COLLAB-IT_CTRL_032.2480.2480.0	5	11.11	81	10100000	99	1	0	0	0	M863m M866m	860	(K)	LAImNYmGNFVDSVHLISPQVQSIAGASTSLKQSR	(K)	m:Oxidized methionine	15.26	759.94	3762.93	32.7403	197.7	Q9VUC6	Formin-like protein CG32138
454	17K03_COLLAB-IT_CTRL_013.3140.3140.0	5	11.1	73.7	12700000	99	1	0	0	0	M483m	483	(K)	mESNETSIFVVTRPSSPIIEDLKSIR	(M)	m:Oxidized methionine	19.58	593.89	2948.54	16.8811	298.9	P35992	Tyrosine-protein phosphatase 10D
458	17K03_COLLAB-IT_CTRL_033.2860.2860.0	3	11.08	74.1	5570000	99	2	0	0	0	M51m	39	(R)	RKSAVQETPLQWmLK	(R)	m:Oxidized methionine	17.56	610.66	1814.99	14.9709	-559.6	Q03019	Cdc25-like protein phosphatase twine
471	17K03_COLLAB-IT_CTRL_011.2597.2606.0	4	10.93	70.5	7270000	99	1	0	0	0	M78m	69	(K)	YHDDPFLIPmSNAAKR	(T)	m:Oxidized methionine	16.12	473.33	1874.92	15.3764	-327.2	A1Z9A8	Protein PTCD3 homolog, mitochondrial
472	17K03_COLLAB-IT_CTRL_031.3487.3487.0	3	10.93	90.1	3390000	99	1	1	1	0	K97k	85	(R)	NGAAQCRPDAVSk	(V)	C:Carbamidomethylation,k:Ubiquitination-GG	21.67	496.94	1373.66	115.146	741.2	Q9VRX6	Innexin inx4
475	17K03_COLLAB-IT_CTRL_032.3039.3039.0	5	10.89	68.3	11900000	99	1	0	0	0	M1146m	1112	(K)	IKQNISANSNGGPSTTSGSNSNGTTNGDDLQNLHmLSESATAR	(E)	m:Oxidized methionine	18.71	872.93	4347.01	13.6071	-547.6	P25172	Protein suppressor 2 of zeste
476	17K03_COLLAB-IT_CTRL_023.3469.3469.0	5	10.88	74.7	8590000	99	1	1	1	0	K550k	490	(K)	GGTLENTVNGGRGGPQSHGPGPGQGGGPPGGGGGGGGGGGPPEGGGDPEAAVPAHLLHPGk	(V)	k:Ubiquitination-GG	21.38	1073.96	5250.48	115.288	232	P25123	Gamma-aminobutyric acid receptor subunit beta
477	17K03_COLLAB-IT_CTRL_032.2385.2385.0	3	10.88	73.8	9690000	99	1	1	1	0	K318k	306	(K)	EVDRLEDDLVLEkER	(Y)	k:Ubiquitination-GG	14.66	657.93	1857.95	113.82	-113	P06754	Tropomyosin-1, isoforms 9A/A/B
478	17K03_COLLAB-IT_CTRL_012.1733.1752.0	5	10.86	91.6	6500000	99	1	0	0	0	M110m	97	(K)	SLDYSVDDIIAKPmIIYYGATTLANR	(H)	m:Oxidized methionine	10.61	584.93	2903.49	17.135	390.3	Q9VEB4	Transcription termination factor 5, mitochondrial
480	17K03_COLLAB-IT_CTRL_021.2109.2109.0	3	10.86	83.4	9720000	99	1	1	1	0	K1484k	1483	(R)	LkGAYEEGQEQLEAVR	(R)	k:Ubiquitination-GG	13.06	645.31	1819.92	113.997	-23.8	P05661	Myosin heavy chain, muscle
486	17K03_COLLAB-IT_CTRL_031.1734.1751.0	3	10.85	65.6	6180000	99	1	1	1	0	K220k	212	(K)	VRLHGVNIkNDFR	(K)	k:Ubiquitination-GG	10.63	560.97	1567.88	113.014	-612.2	Q9VE86	Werner Syndrome-like exonuclease
497	17K03_COLLAB-IT_CTRL_022.2430.2435.2	2	10.76	84.8	19900000	99	1	1	1	0	K94k	93	(K)	DkWSPALQIR	(T)	k:Ubiquitination-GG	14.94	664.49	1213.67	114.304	196.6	P35128	Ubiquitin-conjugating enzyme E2 N
500	17K03_COLLAB-IT_CTRL_023.3770.3779.0	4	10.75	96.2	15100000	99	1	0	0	0	M1920m	1901	(K)	LEVQQFPQGNIQADAPYQFmVRK	(N)	m:Oxidized methionine	23.29	681.76	2707.37	16.6521	241.3	Q9VEN1	Filamin-A
507	17K03_COLLAB-IT_CTRL_022.3013.3013.0	4	10.67	71.6	36500000	99	2	0	0	0	M159m	154	(R)	IINQLmYVPHNYEEIKSSGK	(L)	m:Oxidized methionine	18.4	595.61	2363.21	16.2118	91.1	Q9VUL9	Glycoprotein 3-alpha-L-fucosyltransferase A
514	17K03_COLLAB-IT_CTRL_021.3558.3558.0	4	10.59	72.6	21700000	99	2	0	0	0	M571m M580m	570	(R)	RmSSVSSLNSmVGSADTEEVNQLKAVLYDGK	(L)	m:Oxidized methionine	21.76	838.19	3315.62	34.1186	635.5	Q9W4E2	Neurobeachin
519	17K03_COLLAB-IT_CTRL_011.3262.3311.0	4	10.56	71.5	19000000	99	1	0	0	0	M52m	42	(K)	FCVCHLSTGDmLRAEISSGSK	(L)	C:Carbamidomethylation,m:Oxidized methionine	20.42	593.76	2355.09	16.9292	393.9	Q9U915	Adenylate kinase
523	17K03_COLLAB-IT_CTRL_012.2615.2615.0	5	10.49	70.8	12900000	99	2	2	2	0	K274k K280k	255	(K)	ILVNVGLLTHADRGSLFLAkGTPTNk	(Y)	k:Ubiquitination-GG	16.16	593.4	2735.56	227.414	-226.7	Q9VFI9	cGMP-specific 3',5'-cyclic phosphodiesterase
525	17K03_COLLAB-IT_CTRL_032.2553.2553.0	5	10.48	72.5	10600000	99	1	1	1	0	M1202m K1213k	1189	(R)	GLNIPIQLEELSRmQGHLNSAHQWk	(D)	m:Oxidized methionine,kUbiquitination-GG	15.69	606.29	2899.5	127.921	-699.1	Q9VMJ7	Lysine-specific demethylase lid
533	17K03_COLLAB-IT_CTRL_023.2498.2498.0	5	10.41	62	27200000	99	1	1	1	0	K698k M703m	673	(R)	NESDQGSGNAPAASAGAGTSAGASTkWQTSmIR	(F)	k:Ubiquitination-GG,mOxidized methionine	15.38	660.16	3166.45	130.326	87.3	Q9VLT5	Protein purity of essence
535	17K03_COLLAB-IT_CTRL_033.2649.2649.0	5	10.41	70.8	9230000	99	2	0	0	0	M2757m	2741	(K)	VKDPTEFTGPESYVYAmVKAGILEWFPR	(L)	m:Oxidized methionine	16.29	650.07	3230.62	15.6978	-91.5	P29993	Inositol 1,4,5-trisphosphate receptor
536	17K03_COLLAB-IT_CTRL_011.3452.3457.2	2	10.4	68.9	9790000	99	1	1	1	0	K192k	186	(K)	ENWNLEkATEGLFS	(-)	k:Ubiquitination-GG	21.65	876.46	1637.78	114.132	50.9	P52486	Ubiquitin-conjugating enzyme E2-22 kDa
543	17K03_COLLAB-IT_CTRL_013.3583.3583.0	3	10.38	71.3	6170000	99	2	2	2	0	K954k K960k	952	(K)	NNkDHSSMkEASVSDLSR	(E)	k:Ubiquitination-GG	22.42	745.03	2004.94	228.135	22.1	Q9W1B0	Serine/threonine-protein kinase Genghis Khan
548	17K03_COLLAB-IT_CTRL_023.2672.2672.2	2	10.36	64.2	14300000	99	1	1	1	0	K721k	715	(K)	SLEVEVkNLSIR	(L)	k:Ubiquitination-GG	16.43	751.39	1386.8	114.978	622.4	P35415	Paramyosin, long form
553	17K03_COLLAB-IT_CTRL_021.3753.3753.0	4	10.34	70.2	61600000	99	1	1	1	0	K246k	217	(R)	RAMFDSNYQAAVQYLSYAFSNCPDRFASNk	(R)	C:Carbamidomethylation,k:Ubiquitination-GG	22.98	909.14	3521.6	111.938	-579.3	Q9VTL1	PCI domain-containing protein 2 homolog
555	17K03_COLLAB-IT_CTRL_031.1850.1850.0	3	10.32	76.5	5640000	99	1	1	1	0	K215k	211	(K)	LETEkYDLEER	(Q)	k:Ubiquitination-GG	11.38	513.86	1424.69	114.875	540.5	P19351	Troponin T, skeletal muscle
561	17K03_COLLAB-IT_CTRL_031.2357.2357.0	3	10.26	71.4	13400000	99	1	0	0	0	M224m	213	(K)	QSLPNYLDATKmLPESR	(H)	m:Oxidized methionine	14.58	660.64	1962.99	16.9101	462.2	Q9XYP8	Gamma-tubulin complex component 3 homolog
562	17K03_COLLAB-IT_CTRL_011.2953.2953.0	3	10.25	75	8180000	99	1	0	0	0	M525m	506	(R)	ATVQAEVIPTSDNSLNNKFmTLDNSIR	(A)	m:Oxidized methionine	18.38	998.39	2978.49	14.6667	-443.8	P21330	Nucleic-acid-binding protein from mobile element jockey
563	17K03_COLLAB-IT_CTRL_032.3948.3948.0	3	10.25	71.1	7400000	99	2	0	0	0	M21m	8	(K)	HATGNGTTGNGTAmNDVDQPKDAK	(D)	m:Oxidized methionine	24.55	805.2	2400.08	13.501	-1033.3	Q9VXY7	Lipid storage droplets surface-binding protein 2
564	17K03_COLLAB-IT_CTRL_031.3640.3640.0	4	10.25	77.7	5040000	99	2	0	0	0	M692m	666	(K)	RSPAEQTHPSDEGSSTSSLGPWNKSFmDK	(Q)	m:Oxidized methionine	22.63	796.19	3163.44	18.2996	724.4	Q9U1K1	Protein spire
565	17K03_COLLAB-IT_CTRL_021.2296.2296.0	3	10.24	79.2	23700000	99	1	1	1	0	K562k	558	(R)	EFLFkQRPESLPASR	(K)	k:Ubiquitination-GG	14.22	640.75	1804.97	115.265	636.4	A1ZAI5	Putative fatty acyl-CoA reductase CG5065
570	17K03_COLLAB-IT_CTRL_021.4288.4288.0	4	10.21	74.8	5150000	99	1	1	1	0	K166k	156	(R)	SEERLGSATAkLSEASQAADESER	(A)	k:Ubiquitination-GG	26.36	660.43	2522.2	116.502	931.8	P06754	Tropomyosin-1, isoforms 9A/A/B
571	17K03_COLLAB-IT_CTRL_011.2765.2771.0	3	10.2	73.4	163000000	99	1	1	1	0	K158k	138	(R)	SQSPPASVGSVSFSSPAQQRk	(L)	k:Ubiquitination-GG	17.18	748.87	2132.07	112.522	-677.4	P22807	Homeobox protein slou
574	17K03_COLLAB-IT_CTRL_033.3465.3465.0	5	10.2	83.3	5860000	99	1	0	0	0	M605m M608m	582	(K)	ARGGNVGDAGGAADRVINQILTEmDGmGAK	(K)	m:Oxidized methionine	21.47	595.66	2944.44	29.8345	-724.6	Q7KN62	Transitional endoplasmic reticulum ATPase TER94
585	17K03_COLLAB-IT_CTRL_022.3361.3361.0	3	10.15	61.9	14400000	99	1	1	1	0	K8k	5	(K)	ATTkDLDQWIEQLNECNQLTETQVR	(T)	C:Carbamidomethylation,k:Ubiquitination-GG	20.6	1049.88	3033.46	114.167	39.5	P23696	Serine/threonine-protein phosphatase PP2A
588	17K03_COLLAB-IT_CTRL_011.1990.1990.0	3	10.14	71.2	7190000	99	2	0	0	0	M2296m	2292	(R)	NDEQmAQLQEKESEIVHLK	(Q)	m:Oxidized methionine	12.28	762.4	2269.11	16.0726	34	Q8MSS1	Protein lava lamp
592	17K03_COLLAB-IT_CTRL_032.2609.2609.0	4	10.11	78.9	20700000	99	2	0	0	0	M867m	862	(R)	LLQNQmRATKFNVLLTTYEYVIK	(D)	m:Oxidized methionine	16.04	701.16	2786.53	15.0908	-322.7	P25439	ATP-dependent helicase brm
593	17K03_COLLAB-IT_CTRL_032.2916.2916.0	4	10.11	71.3	13600000	99	0	0	0	0	M1m	1	(-)	mNLCSSGATASTTSLSSTGQAER	(S)	C:Carbamidomethylation,m:Oxidized methionine	17.95	584.19	2317.04	16.6987	301.6	Q9VEK6	Leucine-rich repeat protein soc-2 homolog
596	17K03_COLLAB-IT_CTRL_011.2441.2441.0	5	10.08	69.4	32100000	99	1	1	1	0	K698k M703m	673	(R)	NESDQGSGNAPAASAGAGTSAGASTkWQTSmIR	(F)	k:Ubiquitination-GG,mOxidized methionine	15.14	660.14	3166.45	130.226	56.9	Q9VLT5	Protein purity of essence
602	17K03_COLLAB-IT_CTRL_032.3400.3400.0	3	10.05	88	85100000	99	1	0	0	0	M106m	94	(R)	KAPPSYSDGVYAmAGANRPSTR	(R)	m:Oxidized methionine	21.09	772.09	2296.11	18.1416	927.6	Q9VQH2	Dual oxidase
615	17K03_COLLAB-IT_CTRL_032.2099.2099.0	3	9.99	74	7700000	99	1	1	1	0	K431k M436m	427	(R)	NDANkLSRCmPALASPER	(H)	C:Carbamidomethylation,k:Ubiquitination-GG,mOxidized methionine	12.87	720.44	2029.99	129.315	-334.8	E1JH25	Protein telomere ends associated
616	17K03_COLLAB-IT_CTRL_013.3471.3471.0	4	9.98	81.1	14900000	99	2	2	2	0	K1107k K1109k	1075	(K)	SPTSPSQPQASGSMGRMSASSSTSSAGGQMVDkSk	(K)	k:Ubiquitination-GG	21.71	908.47	3401.54	229.322	340.3	Q9VFI9	cGMP-specific 3',5'-cyclic phosphodiesterase
617	17K03_COLLAB-IT_CTRL_013.3667.3667.0	5	9.98	66.6	13500000	99	0	0	0	0	M797m	779	(R)	SSSIQSIESTEIDFNDLNmVRRGSTELST	(-)	m:Oxidized methionine	22.95	646.89	3216.53	13.8884	-652.1	Q9VYY9	Ecotropic viral integration site 5 ortholog
618	17K03_COLLAB-IT_CTRL_021.3287.3287.0	5	9.97	68.7	34800000	99	1	1	1	0	K1598k	1552	(R)	QRQQHTNPLPTSGAEDSNDSLMVQNSPNSNSNSGGATGSASNSGRNk	(K)	k:Ubiquitination-GG	20.04	983.27	4799.16	113.155	-180.7	Q9VMJ7	Lysine-specific demethylase lid
619	17K03_COLLAB-IT_CTRL_032.3710.3722.0	4	9.97	88.3	22000000	99	1	0	0	0	M1920m	1901	(K)	LEVQQFPQGNIQADAPYQFmVRK	(N)	m:Oxidized methionine	23.06	681.71	2707.37	16.4521	167.8	Q9VEN1	Filamin-A
627	17K03_COLLAB-IT_CTRL_013.2933.2933.0	2	9.94	76.8	6060000	99	1	1	1	0	K181k	167	(R)	GGCVGETYFECCLLk	(-)	C:Carbamidomethylation,k:Ubiquitination-GG	18.27	954.41	1792.77	115.042	523.9	Q9VSF3	Nedd8-conjugating enzyme Ubc12
629	17K03_COLLAB-IT_CTRL_022.2503.2503.0	5	9.93	84.8	11100000	99	0	0	0	0	M213m	185	(K)	LAVEVGSEAFNLFPYVTLCTLDIVCETAmGRR	(I)	C:Carbamidomethylation,m:Oxidized methionine	15.38	729.88	3631.8	13.5752	-663.8	Q9VA27	Cytochrome P450 4c3
634	17K03_COLLAB-IT_CTRL_013.3143.3143.0	4	9.92	74.3	12300000	99	3	0	0	0	M1m	1	(-)	mSAATEQQNNGDVAVEKVAADDVSAVKDDLK	(A)	m:Oxidized methionine	19.6	809.44	3218.55	16.19	60.3	Q9VQF7	Bacchus
636	17K03_COLLAB-IT_CTRL_012.1770.1777.2	2	9.91	76	39000000	99	1	0	0	0	M1130m	1128	(R)	IEmQEDK	(I)	m:Oxidized methionine	10.84	454.7	892.408	15.9847	-11.3	P04146	Copia protein
641	17K03_COLLAB-IT_CTRL_021.2642.2674.0	4	9.87	78.5	70000000	99	1	0	0	0	M1m	1	(-)	mNELDSLRQEAESLK	(N)	m:Oxidized methionine	16.2	445.5	1762.86	16.1142	67	P26308	Guanine nucleotide-binding protein subunit beta-1
645	17K03_COLLAB-IT_CTRL_021.4987.4987.0	4	9.86	74.1	5310000	99	1	0	0	0	M346m	341	(K)	RLKTSmGIEGESDIAFSLVNDTTAR	(L)	m:Oxidized methionine	30.76	682.96	2711.37	17.4513	533.7	Q24179	Protein sly1 homolog
649	17K03_COLLAB-IT_CTRL_021.2978.2978.0	4	9.84	85.2	47300000	99	0	0	0	0	M26m	12	(R)	NGGFCGALQRAPPPmPPTLIRR	(L)	C:Carbamidomethylation,m:Oxidized methionine	18.11	606.44	2406.26	16.4736	197.6	Q9VLW2	Kinesin-like protein CG14535
656	17K03_COLLAB-IT_CTRL_021.2154.2154.0	4	9.82	65.2	12700000	99	3	0	0	0	M643m M645m M657m	639	(K)	KDKHmVmVDEADLSDVAPmK	(S)	m:Oxidized methionine	13.38	578.04	2259.08	50.0564	897.1	Q9W485	Integrator complex subunit 6
663	17K03_COLLAB-IT_CTRL_023.2553.2553.0	3	9.79	81.1	12200000	99	1	1	1	0	K176k	166	(K)	SFVPTFVDHSkAVVAR	(M)	k:Ubiquitination-GG	15.72	625.4	1759.95	114.237	103.3	Q9V3S0	Cytochrome P450 4g1
664	17K03_COLLAB-IT_CTRL_031.2897.2897.0	4	9.79	68.1	8250000	99	1	1	1	0	K530k	507	(K)	RYLLLNQGDFTMQFMDACEDELTk	(N)	C:Carbamidomethylation,k:Ubiquitination-GG	17.93	763.26	2938.34	111.676	-776	Q9XYP7	Gamma-tubulin complex component 2 homolog
671	17K03_COLLAB-IT_CTRL_021.1878.1878.0	4	9.76	71.5	24200000	99	3	0	0	0	M345m	339	(K)	KPFKIVmESQFPSELFK	(-)	m:Oxidized methionine	11.61	519.08	2055.1	18.1998	1063.5	Q8T4E1	Putative GPI-anchor transamidase
672	17K03_COLLAB-IT_CTRL_021.3038.3038.0	5	9.75	65	50600000	99	1	0	0	0	M260m M277m	260	(K)	mFYSQSAAPVDITPENVmCRFKAIGYSR	(M)	C:Carbamidomethylation,m:Oxidized methionine	18.48	654.89	3238.55	31.8727	-35.8	Q9V6B9	Probable nucleoporin Nup54
678	17K03_COLLAB-IT_CTRL_022.4023.4023.0	5	9.74	63.2	6280000	99	1	1	1	0	M236m K266k	236	(R)	mSDELQEIIRVLQLTTYDEDTSELDNLTVLk	(K)	m:Oxidized methionine,kUbiquitination-GG	24.79	751.46	3624.82	128.451	-422.8	O46037	Vinculin
679	17K03_COLLAB-IT_CTRL_021.4117.4124.0	4	9.74	84.8	8930000	99	1	1	1	0	K951k	933	(K)	VNGDGLSLALSNGDLDTLkAEIVR	(E)	k:Ubiquitination-GG	25.28	646.88	2470.32	114.183	54.4	Q8T4F7	Protein enabled
683	17K03_COLLAB-IT_CTRL_032.2963.2963.0	4	9.73	68.8	13800000	99	0	0	0	0	M1913m	1901	(R)	LLRPRQSASGDPmAQELLLESPSR	(E)	m:Oxidized methionine	18.25	668.11	2651.39	18.0248	760.4	P98163	Putative vitellogenin receptor
684	17K03_COLLAB-IT_CTRL_033.2460.2460.0	4	9.73	73.3	10200000	99	0	0	0	0	M276m	274	(K)	QTmFAGRLSDSASGESSFGCLSPIR	(N)	C:Carbamidomethylation,m:Oxidized methionine	15.1	669.44	2661.24	13.4986	-933.3	Q9VVR2	Protein aurora borealis
686	17K03_COLLAB-IT_CTRL_021.1650.1650.3	3	9.72	76.2	6520000	99	1	0	0	0	M278m	264	(K)	LRGLPDLKSHLEEDmAEVHR	(Q)	m:Oxidized methionine	10.16	787.65	2345.2	15.7324	-111.2	Q4V516	Coiled-coil domain-containing protein lobo
687	17K03_COLLAB-IT_CTRL_032.1673.1675.0	3	9.72	73.7	8260000	99	1	0	0	0	M278m	264	(K)	LRGLPDLKSHLEEDmAEVHR	(Q)	m:Oxidized methionine	10.18	787.72	2345.2	15.9424	-22.2	Q4V516	Coiled-coil domain-containing protein lobo
690	17K03_COLLAB-IT_CTRL_031.3811.3811.0	3	9.7	79.6	13600000	99	2	2	2	0	K1502k K1509k	1500	(R)	ENkNLADEVkDLLDQIGEGGR	(N)	k:Ubiquitination-GG	23.7	847.87	2313.17	228.427	134.4	P05661	Myosin heavy chain, muscle
694	17K03_COLLAB-IT_CTRL_033.3125.3125.0	4	9.67	62.4	7500000	99	2	2	2	0	K69k K93k	65	(K)	TIEAkAAVPEQPDVNANPSPSTPAAEPAk	(E)	k:Ubiquitination-GG	19.26	782.35	2900.46	225.915	-694.5	P29746	Protein bangles and beads
696	17K03_COLLAB-IT_CTRL_013.2410.2410.0	4	9.66	76	7260000	99	1	1	1	0	K536k M537m	523	(R)	NFTRPQSVTSTREkmFVR	(I)	k:Ubiquitination-GG,mOxidized methionine	14.96	579.29	2184.13	130.004	-14.7	M9NDE3	Protein bark beetle
700	17K03_COLLAB-IT_CTRL_012.3084.3084.0	4	9.63	74.7	7140000	99	2	2	2	0	K652k K666k	649	(K)	DQQkLSLVNQAQFLLLNkSSVR	(S)	k:Ubiquitination-GG	19.12	689.75	2529.41	226.563	-552.4	Q9VRA2	Molybdenum cofactor sulfurase
701	17K03_COLLAB-IT_CTRL_013.2534.2534.0	5	9.63	83.9	6280000	99	2	0	0	0	M178m	166	(K)	LKVEKWLGSLNEmQASDELSEGQVR	(Q)	m:Oxidized methionine	15.74	573.66	2846.43	17.8356	642.6	Q9V359	Vacuolar protein sorting-associated protein 28 homolog
707	17K03_COLLAB-IT_CTRL_011.3658.3658.0	5	9.6	68.1	13300000	99	2	0	0	0	M381m	350	(R)	DVNDSPPVFNHKEYSVSLLENTLPGTPLALDmSVSDADVGINSK	(F)	m:Oxidized methionine	22.97	941.5	4685.29	18.1782	464.2	Q9VGG5	Cadherin-87A
710	17K03_COLLAB-IT_CTRL_013.3684.3684.0	3	9.59	87.1	3520000	99	1	1	1	0	K674k	666	(K)	EVDLTYIAkVTQGFSGADLTEICQR	(A)	C:Carbamidomethylation,k:Ubiquitination-GG	23.05	977.41	2814.4	115.818	605.6	Q7KN62	Transitional endoplasmic reticulum ATPase TER94
711	17K03_COLLAB-IT_CTRL_012.2904.2904.0	5	9.59	73.3	9120000	99	2	2	2	0	M413m K420k M422m K424k	405	(R)	LNNYQESLmPESPVSkDmDkVTER	(D)	m:Oxidized methionine,kUbiquitination-GG	17.99	615.11	2810.33	261.187	361.9	F0JAI6	Kinetochore and Eb1-associated basic protein
713	17K03_COLLAB-IT_CTRL_022.2471.2498.0	4	9.59	68.4	38200000	99	1	0	0	0	M205m	204	(R)	SmKGLNLELVGRNLFDPR	(A)	m:Oxidized methionine	15.18	519.53	2059.11	15.9865	-4.1	Q9VKM1	Protein piwi
715	17K03_COLLAB-IT_CTRL_012.2917.2917.0	5	9.58	78	3730000	99	1	1	1	0	K159k	127	(R)	RPFGISCLIGGFDADGSAHLFQTEPSGIFYEYkANATGR	(S)	C:Carbamidomethylation,k:Ubiquitination-GG	18.07	873.99	4250.04	115.881	421	P22769	Proteasome subunit alpha type-7-1
719	17K03_COLLAB-IT_CTRL_022.3752.3752.0	4	9.57	75.4	18000000	99	0	0	0	0	M567m M585m	562	(R)	DAWPTmPEQNSREPFILSPSGGEmFQVLVTLLHNLER	(E)	m:Oxidized methionine	23.09	1068.06	4239.1	30.118	-438.4	Q9VS46	RINT1-like protein
730	17K03_COLLAB-IT_CTRL_021.2757.2757.0	4	9.54	72.8	23900000	99	1	0	0	0	M23m M31m	7	(R)	CQDRRILLPSLLLLILmIGGVQATmK	(L)	C:Carbamidomethylation,m:Oxidized methionine	16.84	747.13	2952.69	32.8059	273.3	Q9VT52	Probable insulin-like peptide 3
731	17K03_COLLAB-IT_CTRL_012.3074.3074.0	2	9.53	66.8	4370000	99	1	1	1	0	K52k	45	(R)	NLLSVAYkNVVGAR	(R)	k:Ubiquitination-GG	19.06	809.98	1503.86	115.088	645.9	P29310	14-3-3 protein zeta
733	17K03_COLLAB-IT_CTRL_013.3718.3718.0	4	9.53	72.2	4600000	99	1	0	0	0	M244m M265m	239	(K)	VKVNVmGSLPGGAGGSVGGAGGGSVHmSTGSR	(I)	m:Oxidized methionine	23.27	715.08	2827.39	29.9044	-729.9	Q08180	Irregular chiasm C-roughest protein
738	17K03_COLLAB-IT_CTRL_022.3467.3467.0	3	9.52	79.8	14000000	99	1	1	1	0	K536k	519	(R)	NRLGASGTPTSSLMNQSk	(A)	k:Ubiquitination-GG	21.26	655.08	1848.92	114.302	132.1	O77438	Frizzled-3
741	17K03_COLLAB-IT_CTRL_013.2130.2130.0	5	9.51	73.9	3080000	99	1	1	1	0	K883k	872	(R)	QPATLREIQADkQLR	(Q)	k:Ubiquitination-GG	13.17	376.54	1766.99	111.684	-1255.8	P18490	Protein pecanex
743	17K03_COLLAB-IT_CTRL_032.2762.2762.0	5	9.51	64	6660000	99	3	0	0	0	M104m	88	(K)	LKGIIISGANDDSHPNmVKIFK	(N)	m:Oxidized methionine	16.98	483.86	2397.3	17.975	819.8	Q9VK68	PITH domain-containing protein CG6153
744	17K03_COLLAB-IT_CTRL_013.2569.2569.0	5	9.5	79.6	13200000	99	1	0	0	0	M289m	282	(K)	HSLSADAmSPKADSPQSGISDYGR	(Q)	m:Oxidized methionine	15.96	499.53	2477.14	16.4848	196.4	Q9VB11	Protein unc-80 homolog
747	17K03_COLLAB-IT_CTRL_032.1896.1896.0	5	9.5	77.3	23200000	99	0	0	0	0	M198m	195	(K)	LQLmNAFGDHVGNHFISSFIASLGSAIASTPIDVIRTR	(L)	m:Oxidized methionine	11.6	815.06	4056.11	15.1585	-205.4	Q7K566	Mitochondrial uncoupling protein Bmcp
751	17K03_COLLAB-IT_CTRL_032.2428.2428.0	5	9.49	64.1	15500000	99	1	1	1	0	M506m M519m K524k	500	(R)	FFPDPLmSQLTPQEADAASmALLEkAR	(Q)	m:Oxidized methionine,kUbiquitination-GG	14.94	625.9	2977.48	147.991	626.6	Q94890	T-box protein H15
757	17K03_COLLAB-IT_CTRL_022.3500.3500.2	2	9.46	65.9	21500000	99	1	1	1	0	K192k	186	(K)	ENWNLEkATEGLFS	(-)	k:Ubiquitination-GG	21.47	876.46	1637.78	114.132	50.9	P52486	Ubiquitin-conjugating enzyme E2-22 kDa
761	17K03_COLLAB-IT_CTRL_012.3489.3497.0	4	9.45	77.8	11500000	99	1	0	0	0	M1m	1	(-)	mYGNNNPGSNNNNGGYPPYGYNNKSSGGR	(G)	m:Oxidized methionine	21.81	771.12	3064.3	17.1595	377.9	P19339	Protein sex-lethal
763	17K03_COLLAB-IT_CTRL_022.2747.2753.0	4	9.44	95.8	35400000	99	0	0	0	0	M496m M504m M514m	494	(R)	VLmHYVRAAEmLSAWHSWDGmARIEER	(L)	m:Oxidized methionine	16.83	823.9	3244.56	48.018	10.1	Q24451	Alpha-mannosidase 2
764	17K03_COLLAB-IT_CTRL_031.3780.3780.0	5	9.44	65.5	5070000	99	2	2	2	0	K3959k K3960k M3972m	3958	(K)	EkkDVGFFTSIAGLmNSCSVLDLDAFER	(N)	C:Carbamidomethylation,k:Ubiquitination-GG,mOxidized methionine	23.51	679.6	3149.53	244.443	106.6	Q24498	Ryanodine receptor
765	17K03_COLLAB-IT_CTRL_011.2729.2729.0	3	9.43	96.2	7000000	99	1	1	1	0	K1918k	1909	(R)	ADLAEQAISkFR	(A)	k:Ubiquitination-GG	16.95	488.44	1348.72	114.584	369.4	P05661	Myosin heavy chain, muscle
771	17K03_COLLAB-IT_CTRL_031.3426.3433.0	4	9.42	79.2	72800000	99	1	0	0	0	M166m	154	(K)	VGHEFIEVFGQAmEKSPIVEVRDILAR	(F)	m:Oxidized methionine	21.28	772.1	3069.62	15.7592	-76.4	Q27594	Cytochrome P450 6a9
772	17K03_COLLAB-IT_CTRL_023.2173.2173.0	5	9.41	89.1	9260000	99	1	1	1	0	K362k	341	(K)	ARGSVAGNSGVHDTVVNQLLAk	(I)	k:Ubiquitination-GG	13.33	461.83	2193.17	111.947	-909.1	P54351	Vesicle-fusing ATPase 2
773	17K03_COLLAB-IT_CTRL_022.3352.3352.0	4	9.41	75.5	59300000	99	2	2	2	0	K853k M856m K873k	848	(R)	FVARVkEQmSSFLDGFGSIIPLNLIk	(I)	k:Ubiquitination-GG,mOxidized methionine	20.55	789.32	2909.6	244.662	184.4	Q9VVI3	E3 ubiquitin-protein ligase Nedd-4
780	17K03_COLLAB-IT_CTRL_012.1831.1837.0	5	9.38	65.9	10800000	99	2	0	0	0	M995m	992	(K)	EHLmSNLLNQNQDDIIEGKK	(N)	m:Oxidized methionine	11.22	472.01	2339.17	16.8549	365	Q8INT5	Dynein assembly factor 1, axonemal homolog
789	17K03_COLLAB-IT_CTRL_031.3109.3109.0	5	9.37	70.5	10200000	99	0	0	0	0	M60m	57	(R)	SRFmITDILAGAAAASAAAAAAAAALAAASSGGGRGSPTDSER	(E)	m:Oxidized methionine	19.27	782.45	3890.94	17.2795	328.7	Q24256	Homeobox protein B-H2
794	17K03_COLLAB-IT_CTRL_021.2816.2816.0	5	9.34	67.1	92900000	99	1	1	1	0	M518m M521m K528k	496	(K)	VNYNRTLDLLDTDVILEAEADGmSVmDALYANk	(A)	m:Oxidized methionine,kUbiquitination-GG	17.16	764.38	3672.78	145.094	-246	P40421	Serine/threonine-protein phosphatase rdgC
800	17K03_COLLAB-IT_CTRL_013.2165.2173.0	3	9.31	69.9	12700000	99	1	1	1	0	K74k	71	(R)	FITkIYHPNIDR	(L)	k:Ubiquitination-GG	13.41	544.21	1516.83	113.788	-156.1	P35128	Ubiquitin-conjugating enzyme E2 N
801	17K03_COLLAB-IT_CTRL_011.2513.2513.0	3	9.31	66.9	4970000	99	2	0	0	0	M1003m	1003	(K)	mSADTAKEVQNDK	(T)	m:Oxidized methionine	15.59	484.84	1436.67	15.8369	-108.8	P13217	1-phosphatidylinositol 4,5-bisphosphate phosphodiesterase
805	17K03_COLLAB-IT_CTRL_022.1344.1385.0	4	9.3	90.6	37600000	99	2	0	0	0	M216m	200	(K)	KLAGTLLLGTDGQIPAmK	(T)	m:Oxidized methionine	8.17	462.11	1827.04	18.3773	1291	O01404	Peptidylglycine alpha-hydroxylating monooxygenase
806	17K03_COLLAB-IT_CTRL_031.2143.2143.0	5	9.3	66.3	17300000	99	1	0	0	0	M560m	545	(K)	EFIQAAKIYRPLVGLmNDR	(F)	m:Oxidized methionine	13.24	450.84	2234.21	15.9595	-15.7	Q9VUA0	G patch domain-containing protein 1 homolog
808	17K03_COLLAB-IT_CTRL_011.2872.2872.0	5	9.29	80.8	3190000	99	0	0	0	0	M222m M231m	205	(R)	RDPDTLVVPNFEELANLmGLEAVCTLmLGRR	(M)	C:Carbamidomethylation,m:Oxidized methionine	17.87	713.61	3529.8	34.2245	627	Q9VUF8	Ecdysone 20-monooxygenase
811	17K03_COLLAB-IT_CTRL_013.3077.3077.0	3	9.27	70.6	6470000	99	2	0	0	0	M790m	787	(K)	NSGmDTNVTAGQGGGGGGKKNR	(Q)	m:Oxidized methionine	19.18	693.41	2062.97	15.2472	-359.8	Q9VJJ7	Transient receptor potential-gamma protein
812	17K03_COLLAB-IT_CTRL_011.2944.2944.0	5	9.27	61.4	14500000	99	3	0	0	0	M55m	24	(R)	SADSSSISPAISPVSPPALQSKSLHTAASAGmLCAKWNK	(Y)	C:Carbamidomethylation,m:Oxidized methionine	18.32	794.12	3952.99	13.5813	-608.5	Q9VXB5	39S ribosomal protein L22, mitochondrial
818	17K03_COLLAB-IT_CTRL_012.2707.2707.0	4	9.26	62.1	3750000	99	1	0	0	0	M551m	535	(K)	KDTPPSGTSYSSAGVSmSLGSSGSSSRSR	(Y)	m:Oxidized methionine	16.74	710.22	2820.31	17.5517	548.6	Q9VW51	RNA polymerase II elongation factor Ell
828	17K03_COLLAB-IT_CTRL_031.4413.4413.0	5	9.23	63.3	5240000	99	2	0	0	0	M592m M610m M615m	589	(R)	SILmTTFEGIHYLLCALGDGSmYYFImDQTTGQLTDKK	(K)	C:Carbamidomethylation,m:Oxidized methionine	27.51	882.34	4362.08	45.5868	-544	Q9XYZ5	DNA damage-binding protein 1
829	17K03_COLLAB-IT_CTRL_012.2402.2402.0	3	9.22	77.9	7150000	99	1	1	1	0	K318k	306	(K)	EVDRLEDDLVLEkER	(Y)	k:Ubiquitination-GG	14.82	658.34	1857.95	115.05	510.5	P06754	Tropomyosin-1, isoforms 9A/A/B
832	17K03_COLLAB-IT_CTRL_021.3164.3164.0	4	9.22	82.3	15600000	99	1	1	1	0	K54k	29	(R)	QSRHQQIYGIWADDSEEESGGEGGTkR	(R)	k:Ubiquitination-GG	19.26	784.91	3020.37	116.245	702.1	Q9Y103	Septin-interacting protein 1
836	17K03_COLLAB-IT_CTRL_011.4351.4351.0	4	9.21	86.1	5830000	99	4	0	0	0	M299m	284	(K)	LLVTIFDRETLATHSmTGKPSPAFKDQDKPLK	(R)	m:Oxidized methionine	27.33	900.87	3584.91	15.5437	-125.3	Q8SYK5	Protein insensitive
837	17K03_COLLAB-IT_CTRL_013.3753.3753.0	3	9.21	68.6	7160000	99	2	0	0	0	M979m M990m	979	(R)	mIWEQHLEIIVmLTNLEEYNKAK	(C)	m:Oxidized methionine	23.49	960.32	2845.46	33.4828	518.6	P16620	Tyrosine-protein phosphatase 69D
842	17K03_COLLAB-IT_CTRL_013.2407.2407.0	5	9.2	63.5	8290000	99	1	0	0	0	M57m	40	(K)	ATGEYSNEDLLLSNQNGmISSWNYHDK	(I)	m:Oxidized methionine	14.94	621.37	3086.38	16.4413	143.9	Q961C9	Transport and Golgi organization protein 11
844	17K03_COLLAB-IT_CTRL_021.6046.6046.0	4	9.2	82.4	3890000	99	2	2	2	0	M105m K115k K117k	103	(R)	THmQTTNTPGGSkAkDR	(K)	m:Oxidized methionine,kUbiquitination-GG	37.45	518.96	1829.89	242.926	-557.1	Q9XZT7	Transcription initiation factor TFIID subunit 10b
850	17K03_COLLAB-IT_CTRL_013.2139.2144.0	5	9.19	82.4	71400000	99	1	0	0	0	M442m	440	(R)	INmAHLSIVGSHAVNGVAAIHSQILK	(D)	m:Oxidized methionine	13.23	540.49	2680.47	17.9493	724.3	Q9XTL9	Glycogen phosphorylase
854	17K03_COLLAB-IT_CTRL_022.3546.3546.0	4	9.18	64.7	12300000	99	2	2	2	0	M1m K18k K27k	1	(-)	mSSVDEDLTPEQIAVLQkAFNSFDHQk	(T)	m:Oxidized methionine,kUbiquitination-GG	21.76	831.12	3077.49	243.97	-33.4	P47949	Troponin C, isoform 3
856	17K03_COLLAB-IT_CTRL_032.3172.3172.0	5	9.18	67.6	14700000	99	1	1	1	0	M232m K234k	207	(K)	DAGQIAGLNVLRVINEPTAAALAYGmDk	(T)	m:Oxidized methionine,kUbiquitination-GG	19.59	601.29	2871.5	130.918	293	P29845	Heat shock 70 kDa protein cognate 5
860	17K03_COLLAB-IT_CTRL_033.3008.3008.0	5	9.17	62.6	8880000	99	2	2	2	0	K18k K46k	13	(K)	LPENQkTFAGIPEAVFLEEIDTFMSQPENENCEk	(V)	C:Carbamidomethylation,k:Ubiquitination-GG	18.48	837.67	3954.84	229.48	333.1	Q9VGP6	Prefoldin subunit 3
862	17K03_COLLAB-IT_CTRL_011.2137.2144.0	4	9.16	69.1	88900000	99	2	2	2	0	M3950m M3952m K3957k K3959k	3943	(R)	GGNIDIQmGmLNHLkEk	(K)	m:Oxidized methionine,kUbiquitination-GG	13.21	540.51	1897.96	261.056	454	Q24498	Ryanodine receptor
863	17K03_COLLAB-IT_CTRL_011.3197.3197.0	3	9.16	66.7	5730000	99	1	1	1	0	K2829k M2845m	2829	(K)	kSGAPPPLSEGPIISRmTDR	(G)	k:Ubiquitination-GG,mOxidized methionine	19.95	747.67	2109.11	131.883	823.5	A8DYP0	Obscurin
869	17K03_COLLAB-IT_CTRL_013.1502.1502.0	3	9.14	93.9	1890000	99	1	1	1	0	K1897k	1897	(R)	kAQQELEEAEER	(A)	k:Ubiquitination-GG	9.23	526.05	1459.7	116.433	1516.5	P05661	Myosin heavy chain, muscle
876	17K03_COLLAB-IT_CTRL_021.2741.2758.0	3	9.12	64.6	69500000	99	1	1	1	0	M40m K46k	24	(R)	AAVQGPPLCQSGIVEEmPPHIRk	(V)	C:Carbamidomethylation,m:Oxidized methionine,kUbiquitination-GG	16.75	881.31	2514.3	127.62	-915.2	P61849	Dromyosuppressin
881	17K03_COLLAB-IT_CTRL_032.2371.2371.0	4	9.11	62.9	18500000	99	0	0	0	0	M164m	157	(K)	THYGAIGmDATR	(S)	m:Oxidized methionine	14.59	328.49	1292.61	18.333	1783.5	Q24238	Alkaline phosphatase 4
888	17K03_COLLAB-IT_CTRL_033.3093.3093.0	4	9.09	70.9	11500000	99	2	2	2	0	K1538k M1559m K1564k	1538	(R)	kHNAYVATQGPLQETFVDFWRmCWELk	(T)	C:Carbamidomethylation,k:Ubiquitination-GG,mOxidized methionine	19.05	900.12	3354.62	242.839	-345	P16621	Tyrosine-protein phosphatase Lar
889	17K03_COLLAB-IT_CTRL_033.2617.2617.0	3	9.09	89.4	6040000	99	1	0	0	0	M203m	194	(K)	YALFVTYSKmYTLEIPDLR	(D)	m:Oxidized methionine	16.09	780.1	2323.2	15.0812	-390.8	P04412	Epidermal growth factor receptor
895	17K03_COLLAB-IT_CTRL_012.2586.2586.0	5	9.07	68.2	3900000	99	2	2	2	0	M441m K446k K452k	431	(R)	GVVYIFHGSPmGPLAkPSQIIkSEQLVEGAPYPR	(T)	m:Oxidized methionine,kUbiquitination-GG	15.97	782.84	3665.95	244.22	35.5	P12080	Integrin alpha-PS2
897	17K03_COLLAB-IT_CTRL_022.2646.2646.0	5	9.07	81.7	12100000	99	1	0	0	0	M1043m	1027	(K)	CLRTLVGHTGGVWSSQmSGNIIISGSTDRTLK	(V)	C:Carbamidomethylation,m:Oxidized methionine	16.22	690.06	3431.75	14.5187	-428.4	Q9VZF4	F-box/WD repeat-containing protein 7
901	17K03_COLLAB-IT_CTRL_021.5035.5035.0	4	9.06	74.2	5120000	99	2	2	2	0	K1967k K1971k	1949	(R)	LSVDSEATSSRPGTPTMTkARGk	(R)	k:Ubiquitination-GG	31.06	652.42	2377.21	229.444	521.1	Q9VWE6	Protein ELYS homolog
902	17K03_COLLAB-IT_CTRL_031.3406.3406.0	5	9.06	74.2	7620000	99	0	0	0	0	M2224m	2212	(K)	LTEYLRLALTNYmAYCRLDSGFSSAAIYR	(I)	C:Carbamidomethylation,m:Oxidized methionine	21.15	687.3	3418.69	13.7787	-645.7	Q5EAK6	Serine/threonine-protein kinase ATM
909	17K03_COLLAB-IT_CTRL_033.2706.2706.0	5	9.04	71.8	10900000	99	1	0	0	0	M794m M796m M801m	784	(K)	GVDQTAHTDVmHmEPHLmHIISFIKR	(I)	m:Oxidized methionine	16.64	618.61	3043.51	45.5146	-799.7	O18388	Importin subunit beta
910	17K03_COLLAB-IT_CTRL_011.3502.3504.0	4	9.03	62.3	5910000	99	2	2	2	0	K994k K1010k	992	(K)	FQkFAATYFQGNVNHQYAk	(K)	k:Ubiquitination-GG	21.96	623.08	2262.11	227.189	-360.2	Q9V3Z6	Myosin-VIIa
912	17K03_COLLAB-IT_CTRL_021.4036.4036.0	3	9.03	67.6	12100000	99	1	0	0	0	M1018m	995	(K)	GATGLTGNDGPVGGRGPPGAPGLmGIK	(G)	m:Oxidized methionine	24.78	808.08	2404.24	17.9853	821.7	P08120	Collagen alpha-1(IV) chain
918	17K03_COLLAB-IT_CTRL_013.3443.3443.0	3	9.02	80.8	11600000	99	1	0	0	0	M1m	1	(-)	mEAVQAAAAATSSGGSSGSVPGSGSGSASK	(L)	m:Oxidized methionine	21.53	857.64	2554.17	16.7369	288.6	P13055	Ecdysone-induced protein 75B, isoform B
921	17K03_COLLAB-IT_CTRL_021.3261.3261.0	4	9.02	66.8	105000000	99	1	1	1	0	K868k	839	(R)	NGQPGPRGEPGISRPGPMGPPGLNGLQGEkGDR	(G)	k:Ubiquitination-GG	19.89	848.97	3279.64	113.218	-243.1	P08120	Collagen alpha-1(IV) chain
923	17K03_COLLAB-IT_CTRL_023.3643.3643.0	4	9.01	69.6	7390000	99	0	0	0	0	M834m	827	(K)	AGRGGGGmGGAAFGSGGAVTAGGGPNAGGGVRGSR	(V)	m:Oxidized methionine	22.49	716.08	2845.36	15.9363	-20.5	O96651	DNA topoisomerase 3-beta
927	17K03_COLLAB-IT_CTRL_012.2794.2794.0	3	9	69.7	20900000	99	0	0	0	0	M19m	19	(R)	mIRFCVGFCGNDVADPNFR	(M)	C:Carbamidomethylation,m:Oxidized methionine	17.3	763.98	2275.02	14.9049	-476	Q9VT92	Odorant receptor 67d
928	17K03_COLLAB-IT_CTRL_021.2793.2793.0	3	9	61.2	128000000	99	1	1	1	0	K168k	147	(K)	GQNASATAGSTSATASTTSLAk	(T)	k:Ubiquitination-GG	17.04	699.78	1982.96	114.363	152.6	P91927	Mitochondrial proton/calcium exchanger protein
929	17K03_COLLAB-IT_CTRL_031.3401.3401.0	4	9	61.4	7030000	99	1	1	1	0	K100k	98	(K)	ATkQEGSSANAEAPSVDDPSNFTIHDAVECDGCGLAPLIGFR	(Y)	C:Carbamidomethylation,k:Ubiquitination-GG	21.12	1130.38	4404.01	114.484	97.6	P14199	Protein ref(2)P
931	17K03_COLLAB-IT_CTRL_031.1505.1505.0	3	9	100	2650000	99	1	1	1	0	K1897k	1897	(R)	kAQQELEEAEER	(A)	k:Ubiquitination-GG	9.2	525.28	1459.7	114.123	51	P05661	Myosin heavy chain, muscle
936	17K03_COLLAB-IT_CTRL_022.2377.2377.0	3	8.99	71.8	13700000	99	1	0	0	0	M224m	213	(K)	QSLPNYLDATKmLPESR	(H)	m:Oxidized methionine	14.62	660.62	1962.99	16.8501	431.9	Q9XYP8	Gamma-tubulin complex component 3 homolog
941	17K03_COLLAB-IT_CTRL_022.3557.3557.0	4	8.98	70.4	26000000	99	1	1	1	0	K126k	103	(K)	TAYRTLDGSCNHLEQPGLGVANSkYGR	(L)	C:Carbamidomethylation,k:Ubiquitination-GG	21.82	770.94	2964.44	116.3	732.7	Q01603	Peroxidase
942	17K03_COLLAB-IT_CTRL_032.3052.3052.0	4	8.98	66.4	20500000	99	3	0	0	0	M359m	341	(R)	LCIQCISKLDDYTTATQAmAVLSVLVAFGLKK	(K)	C:Carbamidomethylation,m:Oxidized methionine	18.79	894.19	3557.88	15.8602	-37.7	Q9VT41	Integrator complex subunit 7
944	17K03_COLLAB-IT_CTRL_033.3429.3429.0	4	8.98	68.9	7810000	99	1	0	0	0	M1m	1	(-)	mLKFLILLSAVACALGGTIPEGLLPQLDGR	(I)	C:Carbamidomethylation,m:Oxidized methionine	21.23	796.46	3166.77	16.0451	15.8	P35004	Trypsin beta
947	17K03_COLLAB-IT_CTRL_032.2597.2597.0	4	8.97	93.6	18900000	99	1	1	1	0	M471m M488m M499m K501k	462	(K)	IAVVIYLLYmNLGISAVIGSIACIVImTPLQFFIGNAmSk	(N)	C:Carbamidomethylation,m:Oxidized methionine,kUbiquitination-GG	15.96	1127.06	4344.36	160.853	-260.6	Q9VL32	ATP-binding cassette sub-family C member Sur
952	17K03_COLLAB-IT_CTRL_033.1790.1797.2	2	8.96	75.4	53200000	99	1	0	0	0	M1130m	1128	(R)	IEmQEDK	(I)	m:Oxidized methionine	10.83	454.72	892.408	16.0247	32.7	P04146	Copia protein
953	17K03_COLLAB-IT_CTRL_032.3865.3865.0	4	8.96	68.1	8600000	99	1	1	1	0	K75k	66	(K)	SYLHELGIFkDVSVHIDVSR	(G)	k:Ubiquitination-GG	24.03	608.3	2314.22	115.959	788.5	Q9V784	SAM50-like protein CG7639
956	17K03_COLLAB-IT_CTRL_022.3405.3405.0	5	8.95	72.7	26700000	99	2	0	0	0	M547m M548m	547	(K)	mmRLNSECSDPALLKNCLPGQK	(W)	C:Carbamidomethylation,m:Oxidized methionine	20.88	519.46	2562.23	31.0414	-365.7	Q9VEX0	Extracellular sulfatase SULF-1 homolog
961	17K03_COLLAB-IT_CTRL_011.2481.2481.0	5	8.94	61	14600000	99	1	0	0	0	M4472m	4466	(K)	QHLTINmTVQETSTLNDGK	(W)	m:Oxidized methionine	15.39	429.75	2130.05	14.6713	-617.1	P33450	Cadherin-related tumor suppressor
962	17K03_COLLAB-IT_CTRL_012.2474.2474.0	5	8.94	84	10300000	99	1	1	1	0	M305m K310k	278	(K)	SEPVNPVDDNPSEGDDGATCFSLHDRLmSVRLk	(Q)	C:Carbamidomethylation,m:Oxidized methionine,kUbiquitination-GG	15.28	758.11	3657.69	128.83	-319	Q9VZF4	F-box/WD repeat-containing protein 7
968	17K03_COLLAB-IT_CTRL_012.3938.3938.0	4	8.93	67.1	4810000	99	1	1	1	0	K37k	8	(R)	RHPSGVVGSGIGLGSGSGTGLGSGSTGGSkSGAAVPAIVPPQTVSDR	(S)	k:Ubiquitination-GG	24.66	1083.36	4216.17	114.248	47.3	Q8SY41	Breast carcinoma-amplified sequence 3 homolog
973	17K03_COLLAB-IT_CTRL_031.2123.2135.0	4	8.93	68.8	101000000	99	2	2	2	0	M3950m M3952m K3957k K3959k	3943	(R)	GGNIDIQmGmLNHLkEk	(K)	m:Oxidized methionine,kUbiquitination-GG	13.09	540.31	1897.96	260.256	83.5	Q24498	Ryanodine receptor
976	17K03_COLLAB-IT_CTRL_022.4497.4497.0	5	8.92	70.2	3840000	99	0	0	0	0	M676m M679m	675	(K)	NmAYmVRLGLWGQGTAFGNFNDFITAVER	(R)	m:Oxidized methionine	27.77	662.47	3278.59	29.7335	-682	A8JUV0	Protein strawberry notch
981	17K03_COLLAB-IT_CTRL_013.3091.3091.0	4	8.91	71	12700000	99	2	0	0	0	M32m M42m	24	(K)	LKTNIPAGmAAAGPPLGPmLGQRAINIAAFCK	(D)	C:Carbamidomethylation,m:Oxidized methionine	19.27	821.07	3249.74	31.5161	-144.4	Q9VFJ2	39S ribosomal protein L11, mitochondrial
988	17K03_COLLAB-IT_CTRL_032.2078.2085.3	3	8.91	72.4	31400000	99	0	0	0	0	M902m	895	(R)	DDGWFDLmVNGGGAVTLQFGR	(A)	m:Oxidized methionine	12.74	758.08	2255.05	17.1705	517.4	O61307	Teneurin-m
992	17K03_COLLAB-IT_CTRL_021.2429.2429.0	3	8.9	80.7	10200000	99	3	0	0	0	M1430m	1428	(R)	LNmIKQLKSYAQLK	(Q)	m:Oxidized methionine	15	565.84	1677.97	17.5334	907.4	Q9VC45	Protein abnormal spindle
996	17K03_COLLAB-IT_CTRL_011.2907.2907.0	5	8.89	81.2	7660000	99	1	1	1	0	M1649m M1665m K1668k M1671m	1649	(K)	mRSIALPPELEQQVATmSSkTAmLTR	(Q)	m:Oxidized methionine,kUbiquitination-GG	18.09	611.01	2889.5	161.521	-165.9	P29993	Inositol 1,4,5-trisphosphate receptor
1000	17K03_COLLAB-IT_CTRL_021.2968.2968.0	5	8.88	69.6	18300000	99	1	0	0	0	M1m	1	(-)	mSRLFLPVLAIVLVSIGASHTASLEWPSNLVALSSVK	(S)	m:Oxidized methionine	18.05	785.4	3906.19	16.7784	199.7	Q9VV36	Retinin
1001	17K03_COLLAB-IT_CTRL_033.2168.2175.0	5	8.88	78.6	82800000	99	1	0	0	0	M442m	440	(R)	INmAHLSIVGSHAVNGVAAIHSQILK	(D)	m:Oxidized methionine	13.22	540.47	2680.47	17.8493	687.3	Q9XTL9	Glycogen phosphorylase
1005	17K03_COLLAB-IT_CTRL_011.2474.2474.0	3	8.86	68.8	8220000	99	1	1	1	0	K126k	109	(R)	DPGQDVRGIFFQDGPLWk	(E)	k:Ubiquitination-GG	15.35	729.65	2075.03	111.901	-979.4	Q9VG17	Probable cytochrome P450 304a1
1007	17K03_COLLAB-IT_CTRL_022.3934.3934.0	4	8.86	76.5	3600000	99	0	0	0	0	M159m	151	(R)	ARLATGGAmDTSGDVSGSR	(E)	m:Oxidized methionine	24.23	457.47	1808.86	18.0026	1099	P42283	Longitudinals lacking protein, isoform G
1009	17K03_COLLAB-IT_CTRL_022.1888.1888.0	5	8.86	66.3	4730000	99	1	0	0	0	M1364m	1361	(K)	DVNmGGTTIAATSATQNPDDDVPSCSSAAK	(R)	C:Carbamidomethylation,m:Oxidized methionine	11.56	600.11	2981.31	15.211	-261.6	Q9VDY1	Putative DNA helicase Ino80
1012	17K03_COLLAB-IT_CTRL_022.3443.3443.0	4	8.85	67.4	9690000	99	1	1	1	0	K100k	98	(K)	ATkQEGSSANAEAPSVDDPSNFTIHDAVECDGCGLAPLIGFR	(Y)	C:Carbamidomethylation,k:Ubiquitination-GG	21.11	1130.73	4404.01	115.884	407.3	P14199	Protein ref(2)P
1013	17K03_COLLAB-IT_CTRL_021.1753.1777.2	2	8.85	74.4	175000000	99	1	0	0	0	M1130m	1128	(R)	IEmQEDK	(I)	m:Oxidized methionine	10.8	454.69	892.408	15.9647	-33.3	P04146	Copia protein
1016	17K03_COLLAB-IT_CTRL_022.2810.2810.0	5	8.84	72.5	40100000	99	1	0	0	0	M1307m M1318m	1300	(K)	LCAKAVSmHLVTHIGHFPmGIGASR	(L)	C:Carbamidomethylation,m:Oxidized methionine	17.21	545.3	2690.38	32.0869	35.7	Q9VB98	Probable Rho GTPase-activating protein CG5521
1019	17K03_COLLAB-IT_CTRL_032.3096.3096.0	4	8.84	62.8	15300000	99	1	0	0	0	M82m	65	(K)	SLDSGSSQQQSLATSFImGEIQSDVLK	(N)	m:Oxidized methionine	19.12	718.4	2856.39	14.185	-630.5	Q9GYV5	NF-kappa-B essential modulator
1021	17K03_COLLAB-IT_CTRL_013.1608.1608.0	4	8.83	79.3	2450000	99	0	0	0	0	M1m M13m	1	(-)	mEPPAAGNLLEImDLAR	(T)	m:Oxidized methionine	9.89	469.29	1840.93	33.2086	650.3	Q9VZ08	Receptor-mediated endocytosis protein 6 homolog
1022	17K03_COLLAB-IT_CTRL_021.3136.3136.0	5	8.83	64	27400000	99	1	1	1	0	K126k M141m	126	(K)	kLARLALSTPAIPLQmDVDVDVNVTVDR	(E)	k:Ubiquitination-GG,mOxidized methionine	19.1	637.24	3049.67	132.5	773.6	O77086	Guanine nucleotide-releasing factor 2
1024	17K03_COLLAB-IT_CTRL_011.1879.1879.0	3	8.82	83	5010000	99	1	1	1	0	M504m K515k	504	(R)	mRYTATEPTEQk	(A)	m:Oxidized methionine,kUbiquitination-GG	11.58	528.99	1454.69	130.261	140.8	Q9VD44	Poly(A) RNA polymerase gld-2 homolog A
1028	17K03_COLLAB-IT_CTRL_031.3066.3066.0	4	8.81	66.1	23000000	99	0	0	0	0	M463m	456	(K)	GANEDQNmGIEIIRRALR	(M)	m:Oxidized methionine	18.99	519.12	2056.07	17.3865	671.2	Q9VMN5	60 kDa heat shock protein homolog 2, mitochondrial
1030	17K03_COLLAB-IT_CTRL_012.2516.2527.0	5	8.8	65.6	7920000	99	1	0	0	0	M573m	565	(K)	DLSRSQLDmSRLSLITSSK	(E)	m:Oxidized methionine	15.54	431.13	2137.13	14.4928	-698.2	Q9VB25	Kinesin-like protein Klp98A
1034	17K03_COLLAB-IT_CTRL_022.1814.1822.0	4	8.79	69.2	14800000	99	2	0	0	0	M995m	992	(K)	EHLmSNLLNQNQDDIIEGKK	(N)	m:Oxidized methionine	11.1	588.95	2339.17	13.6122	-1012.7	Q8INT5	Dynein assembly factor 1, axonemal homolog
1041	17K03_COLLAB-IT_CTRL_012.4004.4004.0	4	8.78	63.8	2500000	99	0	0	0	0	M230m	209	(R)	WTQNHCRSLENNEIGPLIVEAmSR	(L)	C:Carbamidomethylation,m:Oxidized methionine	25.08	718.47	2854.37	16.4859	171	Q9V564	Conserved oligomeric Golgi complex subunit 6
1042	17K03_COLLAB-IT_CTRL_021.3838.3838.0	3	8.78	68.1	13800000	99	2	2	2	0	K1502k K1509k	1500	(R)	ENkNLADEVkDLLDQIGEGGR	(N)	k:Ubiquitination-GG	23.52	847.74	2313.17	228.037	-19.1	P05661	Myosin heavy chain, muscle
1044	17K03_COLLAB-IT_CTRL_031.3031.3037.0	5	8.78	65.1	15600000	99	3	0	0	0	M1345m	1342	(R)	WDDmIAKPPSTDGKHQVTTDTEIVTLELLKLR	(H)	m:Oxidized methionine	18.78	733.86	3650.91	14.3611	-445.8	Q9W0T1	Nucleosome-remodeling factor subunit NURF301
1045	17K03_COLLAB-IT_CTRL_013.2600.2600.0	4	8.77	76.8	15400000	99	1	1	1	0	M334m K348k	331	(K)	FTTmPFFCSDRSASAENkSR	(S)	C:Carbamidomethylation,m:Oxidized methionine,kUbiquitination-GG	16.16	618.08	2339.05	130.244	83.4	P26686	Serine-arginine protein 55
1049	17K03_COLLAB-IT_CTRL_033.3645.3645.0	3	8.77	68	7140000	99	1	0	0	0	M1875m M1876m	1865	(R)	SATGEAWQEImmSCSAQPDVK	(C)	C:Carbamidomethylation,m:Oxidized methionine	22.6	787.03	2326.01	33.0606	453.9	Q24270	Voltage-dependent calcium channel type D subunit alpha-1
1052	17K03_COLLAB-IT_CTRL_021.3338.3338.0	4	8.76	73.3	16000000	99	2	0	0	0	M411m M421m	407	(K)	SLFGmLATLVTYELmLLQIDAKSHKGLR	(C)	m:Oxidized methionine	20.38	795.76	3148.73	31.2921	-219.4	Q9W0M2	Gustatory receptor for sugar taste 61a
1054	17K03_COLLAB-IT_CTRL_032.2185.2185.0	3	8.76	67.4	11300000	99	1	1	1	0	K74k	71	(R)	FITkIYHPNIDR	(L)	k:Ubiquitination-GG	13.45	544.25	1516.83	113.908	-82.5	P35128	Ubiquitin-conjugating enzyme E2 N
1056	17K03_COLLAB-IT_CTRL_013.2619.2619.0	3	8.75	84	10500000	99	2	2	2	0	M91m K97k K102k	88	(R)	AQTmSEGNLkGQFVk	(V)	m:Oxidized methionine,kUbiquitination-GG	16.28	627.48	1637.83	242.594	-790.7	P18490	Protein pecanex
1064	17K03_COLLAB-IT_CTRL_013.3437.3437.0	3	8.73	68.3	15100000	99	1	1	1	0	K890k	878	(R)	RSMGGGGSGSSSkQGSPSSSSR	(T)	k:Ubiquitination-GG	21.49	714.77	2027.92	114.379	157.1	Q9VIQ9	Protein sickie
1066	17K03_COLLAB-IT_CTRL_033.3299.3299.0	5	8.73	65.3	28200000	99	3	0	0	0	M138m	136	(R)	ALmVPIVENGDEFPQLILDAKVQQILNWKTAVVFVDQTILEENALLVK	(S)	m:Oxidized methionine	20.39	1084.78	5404.95	14.9228	-197.8	Q9VDH6	Ionotropic receptor 93a
1071	17K03_COLLAB-IT_CTRL_011.2471.2471.0	5	8.71	81.2	7810000	99	1	1	1	0	K114k	89	(K)	RIINNSTGAIQPGTLMALMGSSGSGkTTLMSTLAFR	(Q)	k:Ubiquitination-GG	15.33	759.71	3682.91	111.613	-640.3	P45843	Protein scarlet
1074	17K03_COLLAB-IT_CTRL_032.3409.3409.0	5	8.71	67.4	15000000	99	2	0	0	0	M319m M330m	316	(R)	QTSmILKLFNDIENmDKDLEISISDFALYCSHR	(R)	C:Carbamidomethylation,m:Oxidized methionine	21.15	796.73	3946.9	32.7185	183.1	P84181	Putative gustatory receptor 22d
1081	17K03_COLLAB-IT_CTRL_031.3503.3518.0	3	8.69	72.8	21300000	99	1	1	1	0	K98k	86	(R)	GQSGSLSNAAGVkDPVMLQGDFR	(K)	k:Ubiquitination-GG	21.77	817.49	2334.15	116.305	923	Q9V9S7	Rho GTPase-activating protein 100F
1087	17K03_COLLAB-IT_CTRL_033.2554.2554.0	5	8.68	68.9	3400000	99	1	1	1	0	K327k	290	(R)	STLCQTTSQFITPQAALNSRGNWMFVVNEQNTARQMVk	(A)	C:Carbamidomethylation,k:Ubiquitination-GG	15.7	894.82	4357.13	112.943	-246	Q9VZX1	Protein spaetzle 5
1090	17K03_COLLAB-IT_CTRL_031.2930.2930.0	5	8.67	76.6	30300000	99	1	1	1	0	K181k	148	(K)	ESGHLNSASHLVNDQINIAIETRDHLHAQRQAFk	(R)	k:Ubiquitination-GG	18.14	793.8	3849.95	115.022	246.9	Q9VE50	Golgi SNAP receptor complex member 1
1091	17K03_COLLAB-IT_CTRL_031.4378.4378.0	4	8.67	70.8	9190000	99	0	0	0	0	M250m M258m M269m	244	(K)	FSFEYSmASETDSGmSGDWLEGDAVmTPYR	(K)	m:Oxidized methionine	27.29	854.17	3366.39	47.267	-210.3	Q9VFR0	Protein BCCIP homolog
1095	17K03_COLLAB-IT_CTRL_021.4320.4320.0	5	8.66	71.7	3790000	99	0	0	0	0	M517m	487	(K)	SFGYQSAVENSQLSRLSSSAPTHLGLEHIWmRR	(E)	m:Oxidized methionine	26.56	753.03	3744.87	16.2546	69	Q9VC61	Protein CREBRF homolog
1099	17K03_COLLAB-IT_CTRL_011.2952.2952.0	4	8.64	66.5	22200000	99	1	0	0	0	M205m	204	(R)	SmKGLNLELVGRNLFDPR	(A)	m:Oxidized methionine	18.37	519.13	2059.11	14.3865	-775.7	Q9VKM1	Protein piwi
1103	17K03_COLLAB-IT_CTRL_012.2936.2936.0	4	8.63	81	11200000	99	1	0	0	0	M548m M549m	532	(K)	ALNQKGGGRVCSLLNImmDLR	(K)	C:Carbamidomethylation,m:Oxidized methionine	18.19	595.7	2346.22	33.5579	658.9	O16102	Chromodomain-helicase-DNA-binding protein 3
1105	17K03_COLLAB-IT_CTRL_021.1618.1625.0	5	8.63	66.6	4440000	99	2	0	0	0	M253m	245	(R)	LNKSFDSAmLEGDDAEAGGSAEAVNIPK	(T)	m:Oxidized methionine	9.96	571.23	2836.33	15.7904	-71.7	Q8T0D4	Protein tantalus
1109	17K03_COLLAB-IT_CTRL_031.1726.1736.0	4	8.63	62.2	10800000	99	0	0	0	0	M392m M402m	391	(R)	RmAGGGSGSGSmGGSSRS	(-)	m:Oxidized methionine	10.58	405.28	1585.68	32.4176	264.4	Q9VD28	Bifunctional arginine demethylase and lysyl-hydroxylase PSR
1111	17K03_COLLAB-IT_CTRL_013.1975.1975.0	5	8.62	64.2	5410000	99	1	1	1	0	M947m K950k	929	(R)	SHYTASNAVNAALAAANRmTPk	(S)	m:Oxidized methionine,kUbiquitination-GG	12.2	478.17	2259.13	127.691	-983.2	Q9VXG1	Zinc finger protein hangover
1116	17K03_COLLAB-IT_CTRL_013.2155.2155.0	5	8.61	91.1	3240000	99	1	0	0	0	M278m	274	(K)	LVGNmVAHFYNGTNDAQLLGEK	(I)	m:Oxidized methionine	13.35	482.37	2391.18	16.6447	269.9	Q9VAP3	CTL-like protein 2
1119	17K03_COLLAB-IT_CTRL_021.2603.2648.0	5	8.61	81.4	75100000	99	1	0	0	0	M1951m	1943	(R)	NVAGNHTKmVVEPLQPR	(T)	m:Oxidized methionine	15.99	382.18	1890	16.8695	458.6	P13368	Protein sevenless
1120	17K03_COLLAB-IT_CTRL_023.2583.2583.0	3	8.61	63.3	13300000	99	1	1	1	0	K1228k	1213	(K)	RHLNSATGAGNPVESkR	(L)	k:Ubiquitination-GG	15.9	637.4	1793.94	116.249	1154.9	Q24167	Protein similar
1142	17K03_COLLAB-IT_CTRL_023.3616.3616.0	4	8.55	71.6	39100000	99	2	0	0	0	M367m	362	(R)	LTSRSmDALALAEKEK	(V)	m:Oxidized methionine	22.32	445.07	1762.94	14.3214	-941.6	Q9V8R9	Protein 4.1 homolog
1144	17K03_COLLAB-IT_CTRL_031.1658.1664.0	5	8.55	63.4	6940000	99	1	0	0	0	M84m	68	(K)	FGPKGYGFGTGAGTLSmDNGSQFLRENGDVPSVR	(N)	m:Oxidized methionine	10.16	707.98	3518.68	17.1952	339.4	Q24400	Muscle LIM protein Mlp84B
1145	17K03_COLLAB-IT_CTRL_012.2211.2225.0	5	8.54	87.1	6950000	99	2	0	0	0	M557m	550	(K)	LWNFVDPmQKAPCICTK	(H)	C:Carbamidomethylation,m:Oxidized methionine	13.63	425.72	2108.01	16.5583	265.2	Q7KTX8	Mediator of RNA polymerase II transcription subunit 13
1146	17K03_COLLAB-IT_CTRL_022.3502.3502.0	4	8.54	62.8	18800000	99	1	1	1	0	M1106m K1139k	1106	(R)	mDSTGVPGYSQVTQEVVDSLVGSHFEFRCRGTIk	(V)	C:Carbamidomethylation,m:Oxidized methionine,kUbiquitination-GG	21.48	979.4	3786.82	127.757	-582.7	P32870	Ca(2+)/calmodulin-responsive adenylate cyclase
1150	17K03_COLLAB-IT_CTRL_032.4075.4075.0	4	8.54	64.8	10300000	99	2	2	2	0	M1437m K1438k K1459k	1430	(R)	SQQPVSPmkVDQEPETDLPAATQDQTEFAk	(A)	m:Oxidized methionine,kUbiquitination-GG	25.35	890.19	3315.57	242.17	-537.2	Q9VCX1	Regulator of G-protein signaling loco
1151	17K03_COLLAB-IT_CTRL_031.2973.2973.0	5	8.54	62.1	23800000	99	0	0	0	0	M2751m	2724	(K)	TLISTVQNLIVNEPGIPEGVSSAGAALmSQNPPAFFCSAVVR	(L)	C:Carbamidomethylation,m:Oxidized methionine	18.4	872.39	4342.22	15.6999	-67.7	Q9VB11	Protein unc-80 homolog
1152	17K03_COLLAB-IT_CTRL_011.2984.2984.0	4	8.53	77.1	5660000	99	1	1	1	0	K645k	626	(R)	EIMSAVQRNEVEMQQQQTGk	(K)	k:Ubiquitination-GG	18.57	612.52	2334.12	112.941	-450.5	Q9V4P1	Anillin
1153	17K03_COLLAB-IT_CTRL_013.3068.3068.0	3	8.53	70	18600000	99	1	0	0	0	M324m	310	(R)	GEGGYLINGNGERFmERYAPVAK	(D)	m:Oxidized methionine	19.13	848.46	2528.24	15.1304	-339.9	Q94523	Succinate dehydrogenase [ubiquinone] flavoprotein subunit, mitochondrial
1160	17K03_COLLAB-IT_CTRL_012.2480.2480.0	3	8.52	62.1	8470000	99	2	0	0	0	M1m	1	(-)	mGDYHEFTDQYKVPVIAK	(L)	m:Oxidized methionine	15.31	719.89	2141.04	16.6182	288.9	Q9U6L4	Protein tweety
1163	17K03_COLLAB-IT_CTRL_033.2741.2741.0	5	8.52	71.9	9320000	99	1	0	0	0	M1m M26m	1	(-)	mAGGFRPYDQDSCPNLTNSEAPEFSmSVVCK	(T)	C:Carbamidomethylation,m:Oxidized methionine	16.86	706.19	3494.51	32.4089	118.8	Q9VQD6	Early boundary activity protein 2
1167	17K03_COLLAB-IT_CTRL_013.2892.2892.0	3	8.51	63.9	12200000	99	2	0	0	0	M108m	105	(K)	KGGmILQAESTLALLTTANGGTYK	(V)	m:Oxidized methionine	18.01	819.31	2438.3	17.6195	661.5	Q9VFR1	FAM206 family protein CG9288
1170	17K03_COLLAB-IT_CTRL_012.3843.3843.0	4	8.51	79.2	6370000	99	1	0	0	0	M155m	144	(K)	QGVSAESCVQSmQQSYSIPIPK	(Y)	C:Carbamidomethylation,m:Oxidized methionine	24.07	611.41	2424.15	18.4648	1011.2	Q03042	cGMP-dependent protein kinase, isozyme 1
1173	17K03_COLLAB-IT_CTRL_012.2380.2380.0	5	8.5	68.7	30900000	99	2	0	0	0	M863m M866m	856	(R)	ISSKLAImNYmGNFVDSVHLISPQVQSIAGASTSLKQSR	(K)	m:Oxidized methionine	14.69	842.38	4178.17	29.6972	-544.8	Q9VUC6	Formin-like protein CG32138
1176	17K03_COLLAB-IT_CTRL_021.3262.3262.0	5	8.5	85.4	22700000	99	2	2	2	0	M502m K512k K529k	502	(K)	mSTCEGGDYTkELEDENVRLQLEIEQLk	(Y)	C:Carbamidomethylation,m:Oxidized methionine,kUbiquitination-GG	19.89	714.73	3327.57	242.049	-569.2	Q9V877	Kinesin-like protein subito
1181	17K03_COLLAB-IT_CTRL_013.2350.2356.0	5	8.49	74.1	29900000	99	2	2	2	0	K251k M252m M255m K262k	229	(K)	SAAAWVGHPYFDVIDNSTNFETkmNRmIESVCQk	(L)	C:Carbamidomethylation,k:Ubiquitination-GG,mOxidized methionine	14.58	842.4	3945.84	262.135	489.4	Q7K556	TRPL translocation defect protein 14
1185	17K03_COLLAB-IT_CTRL_013.2434.2442.0	5	8.48	77	6990000	99	1	1	1	0	K370k	370	(R)	kRHNSTAEPVYSPTMAGGLFSIDR	(E)	k:Ubiquitination-GG	15.11	550.55	2634.31	114.412	134.1	Q8MRC9	Putative polypeptide N-acetylgalactosaminyltransferase 9
1188	17K03_COLLAB-IT_CTRL_021.3327.3327.0	4	8.48	89.1	22000000	99	3	0	0	0	M403m	382	(K)	FAHSLLQCLDALYKNDIIHCDmKPENVLLK	(Q)	C:Carbamidomethylation,m:Oxidized methionine	20.29	904.64	3598.82	16.7163	199.5	P83102	Putative dual specificity tyrosine-phosphorylation-regulated kinase 3 homolog
1189	17K03_COLLAB-IT_CTRL_022.3034.3034.0	3	8.48	80.3	32000000	99	1	0	0	0	M857m	847	(K)	TVDALGLELNmPGNQLLAK	(F)	m:Oxidized methionine	18.53	672.52	1997.07	18.4719	1228.9	Q9W3C1	RNA cytidine acetyltransferase
1195	17K03_COLLAB-IT_CTRL_023.2288.2288.0	5	8.47	83.8	5240000	99	2	0	0	0	M364m	363	(R)	KmFVNTTHCVRDAHQK	(G)	C:Carbamidomethylation,m:Oxidized methionine	14.05	398.19	1971.96	14.9569	-522.4	Q9W1J3	Gastrulation defective protein 1 homolog
1197	17K03_COLLAB-IT_CTRL_023.2936.2936.0	4	8.47	65.3	22000000	99	0	0	0	0	M332m M338m	331	(R)	QmVLYCTmLASAQTDSERQR	(I)	C:Carbamidomethylation,m:Oxidized methionine	18.02	606.25	2388.11	33.8677	775.3	Q9VUV9	Putative U5 small nuclear ribonucleoprotein 200 kDa helicase
1199	17K03_COLLAB-IT_CTRL_033.2432.2432.0	5	8.47	83.5	7720000	99	2	0	0	0	M588m M599m M601m	578	(K)	DGNTALHLATmENKPHAISVLmSmGCK	(L)	C:Carbamidomethylation,m:Oxidized methionine	14.9	595.3	2926.4	46.0667	-645.3	Q7Z020	Transient receptor potential cation channel subfamily A member 1
1201	17K03_COLLAB-IT_CTRL_031.2955.2955.0	5	8.47	64.1	13700000	99	1	1	1	0	M279m K283k	257	(K)	QRDPALHLIATTLHVLGIQWAFmDEQkTFFLQLLQLGAIEVR	(M)	m:Oxidized methionine,kUbiquitination-GG	18.29	999.09	4860.64	130.782	149.2	Q9VI25	Neurochondrin homolog
1211	17K03_COLLAB-IT_CTRL_013.3039.3039.0	4	8.44	60.1	6030000	99	1	1	1	0	K732k M734m	723	(R)	SSIFSVTSEkDmNVLEQTTIADLIR	(A)	k:Ubiquitination-GG,mOxidized methionine	18.93	732.62	2797.43	130.029	-2.9	Q94526	Open rectifier potassium channel protein 1
1212	17K03_COLLAB-IT_CTRL_022.2682.2682.0	5	8.44	71.1	12300000	99	1	1	1	0	M251m K252k	246	(R)	CVGRVmkNLADLSLQAGLVDDALSLYHNANETLR	(S)	C:Carbamidomethylation,m:Oxidized methionine,kUbiquitination-GG	16.44	778.32	3756.92	130.655	158.7	Q9VIL0	Protein brunelleschi
1214	17K03_COLLAB-IT_CTRL_031.3945.3945.0	4	8.44	62.2	9450000	99	0	0	0	0	M1m M21m M23m	1	(-)	mDNYTDVLYQYRLAPSASPEmEmELADPR	(Q)	m:Oxidized methionine	24.56	864.68	3405.54	50.1546	627.9	Q8SWR3	Sex peptide receptor
1218	17K03_COLLAB-IT_CTRL_032.3933.3933.0	5	8.43	65.3	3170000	99	1	1	1	0	K206k	190	(R)	TSGGSNRSPYGDSSNVkQEPTSPFEQLR	(K)	k:Ubiquitination-GG	24.46	628.67	3025.43	113.896	-46.7	Q24478	Centrosome-associated zinc finger protein CP190
1224	17K03_COLLAB-IT_CTRL_033.2225.2225.0	4	8.42	85.9	9490000	99	2	0	0	0	M581m	579	(K)	TFmVNLKSWQGVFK	(M)	m:Oxidized methionine	13.6	425.77	1684.89	15.1702	-485.1	Q9VXH6	Calpain-C
1225	17K03_COLLAB-IT_CTRL_012.2899.2899.0	5	8.41	67.5	10400000	99	0	0	0	0	M985m M999m	979	(K)	LQRPTImINYNPETVSTDYDmCDR	(L)	C:Carbamidomethylation,m:Oxidized methionine	17.95	593.49	2932.33	31.0935	-302.5	P05990	CAD protein
1228	17K03_COLLAB-IT_CTRL_031.3029.3029.3	3	8.41	79.1	15300000	99	1	1	1	0	M179m K191k	177	(K)	ALmPQLASSRQAVRk	(R)	m:Oxidized methionine,kUbiquitination-GG	18.76	596.64	1655.94	131.968	1079.6	Q9VKY2	Cullin-associated NEDD8-dissociated protein 1
1229	17K03_COLLAB-IT_CTRL_012.3832.3832.0	5	8.4	70.2	10300000	99	3	0	0	0	M461m	427	(R)	AEATVQVGEKLTQLIADNQVAKGDVLTVAQIAGImGAK	(R)	m:Oxidized methionine	24	774.54	3851.09	17.5762	408.7	Q8IQF1	Molybdenum cofactor biosynthesis protein 1
1230	17K03_COLLAB-IT_CTRL_012.2655.2655.0	4	8.4	72.7	5160000	99	2	0	0	0	M131m	123	(K)	DFQWLGGSmDGGTKDTDKLLVCAPR	(F)	C:Carbamidomethylation,m:Oxidized methionine	16.41	696.55	2767.32	15.8604	-48.3	O44386	Integrin alpha-PS3
1236	17K03_COLLAB-IT_CTRL_021.2925.2925.0	5	8.4	65.8	13700000	99	0	0	0	0	M118m M131m	103	(R)	SSPDTEGALTLEAAImDGESLEYGAVAGmNGVR	(N)	m:Oxidized methionine	17.8	669.66	3311.54	32.7303	221.4	Q9W2C3	L-asparaginase-like protein CG4372
1237	17K03_COLLAB-IT_CTRL_033.2760.2760.0	4	8.4	65.2	15500000	99	1	0	0	0	M23m M31m	7	(R)	CQDRRILLPSLLLLILmIGGVQATmK	(L)	C:Carbamidomethylation,m:Oxidized methionine	16.99	746.95	2952.69	32.0859	32.2	Q9VT52	Probable insulin-like peptide 3
1242	17K03_COLLAB-IT_CTRL_033.3470.3470.0	5	8.39	70.2	5550000	99	1	1	1	0	K3035k	3004	(K)	MTYYFDDMLIESGGRFDQSYTRNGQATLFINk	(M)	k:Ubiquitination-GG	21.5	779.61	3781.76	112.258	-458.3	A8DYP0	Obscurin
1246	17K03_COLLAB-IT_CTRL_013.3487.3487.0	4	8.38	67.8	10200000	99	3	0	0	0	M331m M335m	329	(R)	SAmATVmKISLVLFKSSGLQPK	(L)	m:Oxidized methionine	21.81	592.77	2336.31	31.7501	-101.2	Q9U6L4	Protein tweety
1251	17K03_COLLAB-IT_CTRL_033.2024.2024.0	3	8.38	81	4610000	99	2	2	2	0	M151m K165k K169k	149	(K)	SImPSSSSSGSGASNDkESPk	(S)	m:Oxidized methionine,kUbiquitination-GG	12.3	762.74	2039.92	246.287	964.9	Q9VLT5	Protein purity of essence
1260	17K03_COLLAB-IT_CTRL_013.2493.2497.0	4	8.36	66.3	13900000	99	1	0	0	0	M60m M75m	58	(R)	NSmVLYNPHTLHRYLEEmEEKTR	(D)	m:Oxidized methionine	15.48	731.89	2890.4	34.1407	735.5	Q7KSD8	Transcriptional adapter 2A
1261	17K03_COLLAB-IT_CTRL_032.3842.3842.0	4	8.36	75.5	13800000	99	1	0	0	0	M439m M440m	436	(R)	TILmmGRYVEAIEDVPSGNICGLVGVDQFLVK	(T)	C:Carbamidomethylation,m:Oxidized methionine	23.89	889.72	3523.8	32.0584	19.3	P13060	Elongation factor 2
1265	17K03_COLLAB-IT_CTRL_012.3188.3188.2	2	8.35	60.4	8610000	99	1	1	1	0	K50k	43	(R)	NLLSVAYkNVIGAR	(R)	k:Ubiquitination-GG	19.8	816.93	1517.88	114.973	569.5	P92177	14-3-3 protein epsilon
1269	17K03_COLLAB-IT_CTRL_021.3033.3033.0	4	8.35	82.8	38900000	99	1	1	1	0	K57k	34	(R)	RQVLGGSLTSNPAGGADARLDLTk	(G)	k:Ubiquitination-GG	18.45	628.35	2397.28	113.094	-378.1	P45884	Attacin-A
1270	17K03_COLLAB-IT_CTRL_033.4039.4039.0	5	8.35	68.5	2150000	99	0	0	0	0	M326m	315	(K)	SRLLHALCEILmSSGVPADILTETINAVAEVVR	(G)	C:Carbamidomethylation,m:Oxidized methionine	25.1	719.49	3577.91	15.5128	-134.2	Q9W3N6	General vesicular transport factor p115
1272	17K03_COLLAB-IT_CTRL_021.2408.2422.0	4	8.34	66.4	49700000	99	3	0	0	0	M417m	409	(R)	IEQSKTKPmVK	(Q)	m:Oxidized methionine	14.88	326.66	1288.73	14.8888	-848.5	Q9W4V8	Mitochondrial import inner membrane translocase subunit TIM50-C
1276	17K03_COLLAB-IT_CTRL_021.3981.3981.0	4	8.33	88.5	3260000	99	2	0	0	0	M606m	605	(R)	NmLAVQAGKNHDDFAIILRTLDEVLVK	(R)	m:Oxidized methionine	24.43	760.23	3023.64	14.2635	-569.9	Q9VI82	Nucleolar complex protein 3 homolog
1277	17K03_COLLAB-IT_CTRL_032.2582.2587.0	2	8.33	66.2	24200000	99	1	0	0	0	M2893m	2887	(R)	NNSLHDmK	(A)	m:Oxidized methionine	15.87	488.78	958.441	18.1116	2167.5	Q8I8U7	Transcription-associated protein 1
1278	17K03_COLLAB-IT_CTRL_033.2375.2375.0	4	8.33	63.8	6710000	99	1	0	0	0	M121m	106	(R)	TGNESVGGLAYDPLNmNLFWSDTEQRK	(I)	m:Oxidized methionine	14.53	764.9	3042.43	14.152	-602.9	Q95RU0	Protein cueball
1279	17K03_COLLAB-IT_CTRL_012.2489.2489.0	5	8.32	80.6	5170000	99	2	0	0	0	M915m M924m	911	(R)	EATEmLVGNAQNLmQSVKETVRAAEGASIK	(I)	m:Oxidized methionine	15.37	642.26	3175.61	31.6623	-102.1	O46037	Vinculin
1281	17K03_COLLAB-IT_CTRL_023.3126.3126.0	5	8.32	67.7	30700000	99	2	2	2	0	K1313k K1346k	1313	(R)	kVSSSSEATNSDSTGNGHGVGSTGSVGAAAHLHk	(H)	k:Ubiquitination-GG	19.19	685.67	3194.51	229.815	505	Q9VZ08	Receptor-mediated endocytosis protein 6 homolog
1282	17K03_COLLAB-IT_CTRL_031.1800.1800.0	5	8.32	68	16300000	99	2	2	2	0	K201k K216k M222m	192	(K)	LLQTSYVATkLNGYLAGVGGIEQFkAEAETmGLTPTQR	(Q)	k:Ubiquitination-GG,mOxidized methionine	11.07	861.1	4056.11	245.36	297.4	P08761	Peptide methionine sulfoxide reductase
1287	17K03_COLLAB-IT_CTRL_022.4164.4164.0	4	8.31	70.5	4610000	99	2	2	2	0	K289k K302k	284	(R)	FMESSkQVEPTSPTPTLPkAPSSELDVIR	(E)	k:Ubiquitination-GG	25.67	850.8	3171.62	228.554	137.7	A1Z7Z9	Centrosomal protein of 131 kDa
1294	17K03_COLLAB-IT_CTRL_022.3713.3713.0	4	8.3	67.6	6300000	99	1	1	1	0	M671m K698k	669	(R)	DVmRNESDQGSGNAPAASAGAGTSAGASTk	(W)	m:Oxidized methionine,kUbiquitination-GG	22.84	724.07	2765.24	128.019	-697.8	Q9VLT5	Protein purity of essence
1296	17K03_COLLAB-IT_CTRL_032.4620.4643.0	3	8.3	79.1	10600000	99	1	1	1	0	K910k	889	(K)	NVNDCLQETDCLATCTTRTPLk	(E)	C:Carbamidomethylation,k:Ubiquitination-GG	28.79	908.45	2610.2	113.14	-331.6	E1JH25	Protein telomere ends associated
1298	17K03_COLLAB-IT_CTRL_033.2510.2510.0	5	8.3	65.8	9960000	99	2	0	0	0	M349m	347	(K)	YFmPTWNVVLDLLDSFTDEELKREVKPEGR	(N)	m:Oxidized methionine	15.42	729.6	3626.82	17.1509	317.2	P55824	Probable ubiquitin carboxyl-terminal hydrolase FAF
1299	17K03_COLLAB-IT_CTRL_012.2950.2950.0	3	8.29	62	30100000	99	1	1	1	0	K112k	99	(K)	EEPEEWQNNLDNWkSSR	(R)	k:Ubiquitination-GG	18.27	758.42	2160.96	112.287	-772.3	Q0KIC3	Uncharacterized protein CG43427
1300	17K03_COLLAB-IT_CTRL_011.2438.2438.0	4	8.29	86.6	7480000	99	1	0	0	0	M995m	992	(K)	EHLmSNLLNQNQDDIIEGK	(K)	m:Oxidized methionine	15.11	558.04	2211.07	18.0671	929.6	Q8INT5	Dynein assembly factor 1, axonemal homolog
1302	17K03_COLLAB-IT_CTRL_023.2377.2384.0	5	8.29	73.8	42800000	99	2	2	2	0	K251k M252m M255m K262k	229	(K)	SAAAWVGHPYFDVIDNSTNFETkmNRmIESVCQk	(L)	C:Carbamidomethylation,k:Ubiquitination-GG,mOxidized methionine	14.62	842.38	3945.84	262.035	465.7	Q7K556	TRPL translocation defect protein 14
1308	17K03_COLLAB-IT_CTRL_012.2781.2781.0	5	8.28	84.3	8370000	99	1	1	1	0	K207k	190	(K)	TNTDFTVIGVLGGQSSGkSTLLNLLAAER	(S)	k:Ubiquitination-GG	17.2	616.17	2962.58	114.237	62.9	O46080	Protein SMG9
1311	17K03_COLLAB-IT_CTRL_032.3488.3488.0	5	8.28	62.3	10400000	99	1	1	1	0	K204k	174	(K)	VSLGLRGMAAGGIIGGFLGGVAGVTSLLLMkASGTSMEEVR	(Y)	k:Ubiquitination-GG	21.65	815.82	3963.12	111.948	-514.1	P81928	RPII140-upstream gene protein
1316	17K03_COLLAB-IT_CTRL_023.3816.3816.0	4	8.27	73.2	3180000	99	1	1	1	0	K864k M868m	859	(K)	QSAGGkGLTmPPLSPPATSSAR	(L)	k:Ubiquitination-GG,mOxidized methionine	23.58	561.08	2111.09	130.207	75.4	P25172	Protein suppressor 2 of zeste
1317	17K03_COLLAB-IT_CTRL_031.3589.3589.0	5	8.27	69.1	33800000	99	2	2	2	0	M208m K225k M229m K236k	196	(K)	AYELSTLTGTQVmLLVASETGHVYTFATRkLQPmITSEAGk	(Q)	m:Oxidized methionine,kUbiquitination-GG	22.31	941.15	4443.29	258.427	-350.6	Q24535	Serum response factor homolog
1318	17K03_COLLAB-IT_CTRL_033.3141.3141.0	4	8.27	73.7	20000000	99	2	2	2	0	M105m K115k K117k	103	(R)	THmQTTNTPGGSkAkDR	(K)	m:Oxidized methionine,kUbiquitination-GG	19.36	519.1	1829.89	243.486	-286.9	Q9XZT7	Transcription initiation factor TFIID subunit 10b
1319	17K03_COLLAB-IT_CTRL_011.2366.2366.0	3	8.26	66.2	12500000	99	2	0	0	0	M462m	455	(K)	LYKPNGQmNAEEFTK	(Q)	m:Oxidized methionine	14.67	595.23	1769.85	13.8228	-1217.8	Q9W032	Protein ecdysoneless
1321	17K03_COLLAB-IT_CTRL_033.1832.1838.0	3	8.26	64.8	6640000	99	2	0	0	0	M294m	284	(K)	GGKPCLVYQLmKGGSLEARLR	(A)	C:Carbamidomethylation,m:Oxidized methionine	11.1	782.98	2333.26	13.6674	-991.7	Q05652	Serine/threonine-protein kinase pelle
1334	17K03_COLLAB-IT_CTRL_011.1907.1907.0	5	8.23	63.5	5190000	99	2	0	0	0	M687m	672	(K)	SYAIPIEIKDNGAPAmTGTSTLTVTIGDVNDNK	(M)	m:Oxidized methionine	11.76	685.02	3406.7	14.3663	-476.1	Q9VJB6	Putative neural-cadherin 2
1336	17K03_COLLAB-IT_CTRL_023.2017.2017.0	5	8.23	73.9	4550000	99	1	1	1	0	K83k M102m	82	(R)	EkIPEIYQNIHESILQLVGQmGVLGIDFGSCTSER	(S)	C:Carbamidomethylation,k:Ubiquitination-GG,mOxidized methionine	12.34	819.24	3960.98	131.188	280.9	Q05337	Guanine nucleotide-binding protein G(f) subunit alpha
1337	17K03_COLLAB-IT_CTRL_023.2538.2538.0	3	8.23	62.9	4540000	99	3	0	0	0	M401m	397	(R)	KPVGmPKILLVIGGQAPK	(A)	m:Oxidized methionine	15.62	620.84	1846.13	14.3708	-873	Q04652	Ring canal kelch protein
1348	17K03_COLLAB-IT_CTRL_031.4397.4397.0	4	8.21	71.8	6070000	99	1	0	0	0	M451m	424	(K)	GELKLLGPGGAQSGTAGGEGGLAATDFmTGHHEGGLR	(S)	m:Oxidized methionine	27.41	881.39	3506.71	15.8301	-46.8	Q9VNM1	Neuropeptide F receptor
1354	17K03_COLLAB-IT_CTRL_021.3344.3344.0	5	8.2	87.3	11400000	99	2	0	0	0	M212m M213m M222m M241m	206	(K)	DPTCVPmmHSLSSFETmSTDEAKGIYIPFSSANLGmLILLPRK	(G)	C:Carbamidomethylation,m:Oxidized methionine	20.42	970.72	4785.35	64.224	50.4	Q9VVW1	Accessory gland protein Acp76A
1355	17K03_COLLAB-IT_CTRL_021.4832.4832.0	4	8.2	65.8	9180000	99	2	2	2	0	K1599k K1601k	1566	(K)	GNSSSGAANARQQTAATGNNGATVPAASLPPATkSk	(-)	k:Ubiquitination-GG	29.78	895.77	3353.68	226.379	-476.8	P35820	Polycomb group protein Psc
1356	17K03_COLLAB-IT_CTRL_023.3050.3050.0	4	8.2	85.6	3840000	99	1	1	1	0	M311m M315m M317m K318k	285	(K)	LVGDVDYAEALQVAGHLTPVPGGVGPmTVAmLmk	(N)	m:Oxidized methionine,kUbiquitination-GG	18.73	900.04	3436.77	160.37	-460.7	O96553	C-1-tetrahydrofolate synthase, cytoplasmic
1357	17K03_COLLAB-IT_CTRL_032.2128.2128.0	3	8.2	73.7	6830000	99	1	1	1	0	K1484k	1483	(R)	LkGAYEEGQEQLEAVR	(R)	k:Ubiquitination-GG	13.05	645.9	1819.92	115.767	890.7	P05661	Myosin heavy chain, muscle
1364	17K03_COLLAB-IT_CTRL_013.1859.1859.0	5	8.18	86.7	6650000	99	0	0	0	0	M198m	195	(K)	LQLmNAFGDHVGNHFISSFIASLGSAIASTPIDVIRTR	(L)	m:Oxidized methionine	11.47	815.44	4056.11	17.0585	261.1	Q7K566	Mitochondrial uncoupling protein Bmcp
1368	17K03_COLLAB-IT_CTRL_032.1967.1973.0	4	8.18	79.5	8690000	99	0	0	0	0	M706m	703	(K)	VRQmVTDSPGLDATR	(I)	m:Oxidized methionine	12.04	416.22	1645.83	16.0255	18.4	P55824	Probable ubiquitin carboxyl-terminal hydrolase FAF
1372	17K03_COLLAB-IT_CTRL_023.3021.3021.0	4	8.16	68.2	8580000	99	1	1	1	0	M273m K296k	272	(R)	LmRALDGIQEVTLAYVDEAIERLDk	(E)	m:Oxidized methionine,kUbiquitination-GG	18.54	749.11	2861.51	131.91	625.6	Q9VE00	Probable cytochrome P450 12a4, mitochondrial
1373	17K03_COLLAB-IT_CTRL_021.3831.3831.0	5	8.16	63.8	5270000	99	1	1	1	0	M46m K56k	28	(K)	LSRHLANLGGPHVDSFDEmLTVGLDNSAk	(H)	m:Oxidized methionine,kUbiquitination-GG	23.47	645.11	3093.54	127.979	-639.2	P20028	DNA-directed RNA polymerase I subunit RPA2
1374	17K03_COLLAB-IT_CTRL_022.4869.4869.0	3	8.16	78.3	11000000	99	1	1	1	0	K208k	192	(R)	SGVEIAGARAVVLGRSk	(I)	k:Ubiquitination-GG	30.11	594.87	1669.97	112.625	-795.6	O96553	C-1-tetrahydrofolate synthase, cytoplasmic
1376	17K03_COLLAB-IT_CTRL_013.3511.3511.0	5	8.15	86.2	5200000	99	1	1	1	0	M149m M180m K181k	148	(R)	ImYDLIQSCSEEGVIHIQEQLELSQDASIELEmk	(D)	C:Carbamidomethylation,m:Oxidized methionine,kUbiquitination-GG	21.96	825.59	3978.9	145.019	-245.9	Q9V6H1	Probable cytochrome P450 9h1
1379	17K03_COLLAB-IT_CTRL_021.1942.1942.0	5	8.15	65.4	9050000	99	1	1	1	0	M822m K834k	806	(R)	TRTNEAVDTLTDSILTmSLSQVVDSNAAkLTR	(E)	m:Oxidized methionine,kUbiquitination-GG	12.01	716.85	3450.78	129.446	-165.2	Q9W1X4	Nuclear pore complex protein Nup214
1383	17K03_COLLAB-IT_CTRL_031.2863.2863.0	5	8.15	72.5	19000000	99	2	0	0	0	M153m	126	(R)	YQLPSDVNPDTVTSSLSSDGLLTIKAPmKALPPPQTER	(L)	m:Oxidized methionine	17.73	817.91	4067.1	18.4204	593.7	P82147	Protein lethal(2)essential for life
1384	17K03_COLLAB-IT_CTRL_013.2919.2919.0	4	8.14	66.4	9780000	99	1	1	1	0	K785k	767	(R)	LTRLQNLTSNQRIVQNNIk	(S)	k:Ubiquitination-GG	18.18	593.08	2253.28	116.02	834.3	Q9W1X4	Nuclear pore complex protein Nup214
1388	17K03_COLLAB-IT_CTRL_011.2375.2375.0	3	8.13	74.4	5310000	99	1	0	0	0	M1682m M1686m	1671	(K)	ALAEAIQEATAmNPDmTVEK	(I)	m:Oxidized methionine	14.72	722.03	2133.02	31.0552	-431.9	Q9V8R9	Protein 4.1 homolog
1396	17K03_COLLAB-IT_CTRL_031.3331.3331.0	3	8.12	78.6	15400000	99	1	1	1	0	K8k	5	(K)	ATTkDLDQWIEQLNECNQLTETQVR	(T)	C:Carbamidomethylation,k:Ubiquitination-GG	20.68	1050.06	3033.46	114.707	211	P23696	Serine/threonine-protein phosphatase PP2A
1401	17K03_COLLAB-IT_CTRL_032.3622.3622.0	4	8.11	67.1	3800000	99	1	0	0	0	M132m	119	(R)	RECPGENCGAGVFmAAHEDRHYCGK	(C)	C:Carbamidomethylation,m:Oxidized methionine	22.5	731.32	2908.21	14.0451	-667.2	P15357	Ubiquitin-40S ribosomal protein S27a
1402	17K03_COLLAB-IT_CTRL_012.1674.1674.0	3	8.1	75.3	12200000	99	1	1	1	0	K121k M132m	121	(R)	kRSTEIQVGEDmPR	(K)	k:Ubiquitination-GG,mOxidized methionine	10.23	593.09	1645.83	131.423	779.3	Q9W1V1	Protein arginine N-methyltransferase 7
1403	17K03_COLLAB-IT_CTRL_023.3139.3139.0	4	8.1	100	9160000	99	1	1	1	0	M1468m K1486k	1458	(R)	DSPPLPHPPSmLHPALLAAAHHGGSPDYk	(T)	m:Oxidized methionine,kUbiquitination-GG	19.27	786.04	3010.5	130.639	191.4	P29617	Homeobox protein prospero
1404	17K03_COLLAB-IT_CTRL_021.3034.3034.0	5	8.1	78.1	15000000	99	1	0	0	0	M943m M946m	912	(R)	SVESSPRGGGGYGYGVSQDPGGSGNGSNNSLmPAmTTFGHKR	(S)	m:Oxidized methionine	18.46	838.68	4157.88	31.4921	-118.8	A1Z7A6	ArfGAP with SH3 domain, ANK repeat and PH domain-containing protein
1407	17K03_COLLAB-IT_CTRL_013.2421.2421.0	5	8.09	75.4	7430000	99	1	1	1	0	M193m K205k	191	(R)	SRmLQQQREEEVLQk	(E)	m:Oxidized methionine,kUbiquitination-GG	15.03	406.94	1901.99	128.685	-666.3	Q9W062	Microfibrillar-associated protein 1
1411	17K03_COLLAB-IT_CTRL_011.2521.2521.0	4	8.08	71.1	4360000	99	2	2	2	0	M904m K907k K915k	897	(K)	LLTCSQPmCGkRFHTSCCk	(Y)	C:Carbamidomethylation,m:Oxidized methionine,kUbiquitination-GG	15.64	654.04	2371.06	242.078	-766.2	Q8MT36	Probable histone-lysine N-methyltransferase Mes-4
1412	17K03_COLLAB-IT_CTRL_012.2585.2585.0	5	8.08	83.2	13200000	99	2	0	0	0	M1m	1	(-)	mFYTVIWIFCATLLAILFGGVRKPK	(R)	C:Carbamidomethylation,m:Oxidized methionine	15.97	592.85	2944.63	15.5865	-138	Q9V399	Probable cytochrome P450 303a1
1414	17K03_COLLAB-IT_CTRL_021.3442.3442.0	3	8.08	77.4	15000000	99	2	2	2	0	K427k K444k	425	(K)	HHkILLSNFLAQTEALMAGk	(T)	k:Ubiquitination-GG	21.04	816.99	2222.21	226.744	-547.9	P52029	Glucose-6-phosphate isomerase
1424	17K03_COLLAB-IT_CTRL_031.3058.3058.0	4	8.06	61.7	14200000	99	0	0	0	0	M918m	880	(K)	LSGGAGSGSAGSGHEGANGNSGGAGSNTTNSGGESPRPmR	(K)	m:Oxidized methionine	18.94	891.23	3544.55	17.3532	381.3	Q8T4F7	Protein enabled
1425	17K03_COLLAB-IT_CTRL_033.3160.3160.0	5	8.06	60.2	16600000	99	3	0	0	0	M446m	435	(R)	QDLTFQGSGYNmSPLGVSGVPGLGGLVAGGVAGVAVAKNKEK	(L)	m:Oxidized methionine	19.48	810.11	4030.11	16.4143	103.6	P13709	Homeotic protein female sterile
1433	17K03_COLLAB-IT_CTRL_011.2065.2065.0	5	8.04	88.1	7530000	99	1	0	0	0	M321m	301	(R)	EGTAATLQEVSRKGQEYQNAmAR	(V)	m:Oxidized methionine	12.75	511.68	2538.24	16.1344	54.6	P49021	Protein timeless
1435	17K03_COLLAB-IT_CTRL_022.1887.1894.0	5	8.04	67.2	7330000	99	1	0	0	0	M420m	408	(R)	HFTTVEFFQGTImNPIDLQRVK	(V)	m:Oxidized methionine	11.55	528.64	2621.35	17.8164	690.2	Q03720	Calcium-activated potassium channel slowpoke
1436	17K03_COLLAB-IT_CTRL_022.3698.3698.0	3	8.04	66.5	9340000	99	1	1	1	0	M591m M593m K606k	591	(R)	mAmQLHLACAHSQETk	(L)	C:Carbamidomethylation,m:Oxidized methionine,kUbiquitination-GG	22.75	668.42	1855.86	147.384	674.7	A1Z9R4	Zinc finger protein 423 homolog
1444	17K03_COLLAB-IT_CTRL_011.3205.3205.0	4	8.03	72.3	74400000	99	1	1	1	0	K799k	780	(K)	GQFNANNTRAESVISSELNkSHILNSTSIGETENR	(L)	k:Ubiquitination-GG	20	983.18	3817.87	111.828	-563.6	P25823	Maternal protein tudor
1449	17K03_COLLAB-IT_CTRL_033.3220.3220.0	5	8.03	67.3	50300000	99	2	2	2	0	M22m K39k K49k	11	(K)	LQDAFTSLGVHmQLDLPQIAVVGGQSAGkSSVLENFVGkDFLPR	(G)	m:Oxidized methionine,kUbiquitination-GG	19.87	983.2	4669.44	242.526	-316.5	P27619	Dynamin
1457	17K03_COLLAB-IT_CTRL_031.3434.3434.0	5	8.02	71.9	7600000	99	0	0	0	0	M527m	488	(R)	RSIFGSEPRLPELPSALGYTSHLVHQTTDDSPRPSVQFNmSGR	(H)	m:Oxidized methionine	21.34	957.05	4767.37	13.8513	-448.3	Q9W2E1	Protein stum
1459	17K03_COLLAB-IT_CTRL_013.2190.2200.0	5	8.01	79	12600000	99	2	2	2	0	K233k K242k	233	(R)	kPAATTSRSkLAQQQQR	(R)	k:Ubiquitination-GG	13.57	425.77	1899.05	225.769	-1090.4	Q7KU24	Chromodomain-helicase-DNA-binding protein 1
1463	17K03_COLLAB-IT_CTRL_021.2747.2747.0	5	8.01	86.5	52000000	99	2	0	0	0	M428m	409	(R)	VRNGVATFLQLQQPNVKNYmEK	(D)	m:Oxidized methionine	16.79	519.51	2577.36	16.1603	63.8	Q9W4S1	Glutaredoxin domain-containing cysteine-rich protein CG12206
1464	17K03_COLLAB-IT_CTRL_032.3776.3776.0	3	8.01	75.1	5950000	99	2	2	2	0	M149m K153k K155k M158m	141	(R)	SLFAGVPSmGENkPkNFmQLAGR	(I)	m:Oxidized methionine,kUbiquitination-GG	23.47	914.19	2479.26	261.297	445.6	O18405	Surfeit locus protein 4 homolog
1478	17K03_COLLAB-IT_CTRL_033.3548.3548.0	5	7.98	78.1	3060000	99	1	0	0	0	M524m	517	(K)	ELPQLQRmLLSATLTSQVQQLAGLTLK	(N)	m:Oxidized methionine	21.99	600.15	2980.69	16.0345	13.2	Q86B47	Probable ATP-dependent RNA helicase CG8611
1479	17K03_COLLAB-IT_CTRL_031.2742.2742.0	4	7.98	67.6	25800000	99	0	0	0	0	M654m	632	(R)	EQNLASGDTSAASSLSDDVSLAmRNTTAR	(L)	m:Oxidized methionine	16.96	746.89	2968.39	16.1469	50.9	Q9VB70	Lateral signaling target protein 2 homolog
1482	17K03_COLLAB-IT_CTRL_032.1962.1962.0	5	7.98	78.2	9920000	99	2	0	0	0	M107m M108m	94	(K)	YKLDCSEVARLNDmmSDVK	(R)	C:Carbamidomethylation,m:Oxidized methionine	12.01	462.11	2274.06	32.4646	205.8	Q9VTM0	Biogenesis of lysosome-related organelles complex 1 subunit 6
1483	17K03_COLLAB-IT_CTRL_013.1780.1780.0	4	7.97	73.5	3410000	99	2	0	0	0	M1m	1	(-)	mGTETKSNSYTGQISTSGGNPK	(V)	m:Oxidized methionine	10.98	566.07	2245.04	16.2181	98.7	P54352	Ethanolamine kinase
1488	17K03_COLLAB-IT_CTRL_032.3456.3456.0	3	7.97	72.7	23400000	99	1	1	1	0	M540m M546m M553m K554k	533	(R)	TATHDSGmVSDGAmSLSGHSmk	(H)	m:Oxidized methionine,kUbiquitination-GG	21.45	789.99	2206.95	161.003	-432.8	Q9V407	Axin
1492	17K03_COLLAB-IT_CTRL_021.2707.2707.0	4	7.96	61.4	22800000	99	1	0	0	0	M104m M107m M124m M126m	96	(K)	GPRYSLASmVVmGFVAAILSTVTVAGNVmVmISFK	(I)	m:Oxidized methionine	16.56	929.08	3646.92	66.375	645.1	P16395	Muscarinic acetylcholine receptor DM1
1493	17K03_COLLAB-IT_CTRL_021.3959.3959.0	5	7.96	83.8	5090000	99	1	0	0	0	M1m M25m	1	(-)	mPESLIAGIPVHFPFEPYPVQRAYmEKVIHCLR	(D)	C:Carbamidomethylation,m:Oxidized methionine	24.29	792.66	3925.01	34.2595	573.3	Q9W484	Regulator of telomere elongation helicase 1 homolog
1496	17K03_COLLAB-IT_CTRL_033.2571.2571.0	3	7.96	73.4	5780000	99	0	0	0	0	M302m	290	(K)	NVQLRACVRGVQmTGGAHITGQLIWR	(E)	C:Carbamidomethylation,m:Oxidized methionine	15.8	979.1	2921.55	13.7393	-768.4	O77059	Cryptochrome-1
1501	17K03_COLLAB-IT_CTRL_033.3705.3705.0	4	7.95	93.2	9830000	99	1	1	1	0	K259k	247	(K)	SQSRSMSCSSIQk	(I)	C:Carbamidomethylation,k:Ubiquitination-GG	22.98	401.13	1485.68	115.82	1109.5	Q9W3Y5	Putative ATP-dependent RNA helicase CG14443
1507	17K03_COLLAB-IT_CTRL_012.3527.3527.0	5	7.93	70.3	8050000	99	1	0	0	0	M103m M106m M135m	102	(R)	AmTQmREAGVTAFIGPDESCTTEALLASAWNTPmLSFK	(C)	C:Carbamidomethylation,m:Oxidized methionine	22.05	837.14	4132.95	48.7222	176.4	Q07553	Guanylate cyclase 32E
1508	17K03_COLLAB-IT_CTRL_011.2638.2638.0	5	7.93	64.2	8110000	99	0	0	0	0	M401m	396	(K)	FHIYNmGGEPGFELERAR	(F)	m:Oxidized methionine	16.38	428.95	2123.01	17.7082	800.3	P32866	G protein-coupled receptor kinase 2
1512	17K03_COLLAB-IT_CTRL_021.1695.1695.0	5	7.93	73.7	2500000	99	2	0	0	0	M9m	8	(K)	QmVGNQLSAVKGAVGGDGGDDGDDK	(E)	m:Oxidized methionine	10.44	481.57	2390.09	13.732	-941.4	Q8IPM8	Complexin
1516	17K03_COLLAB-IT_CTRL_032.3063.3063.0	4	7.93	82.6	10500000	99	2	2	2	0	K997k M1001m K1004k	986	(R)	FILSLVIQYNLkVHQmDVk	(T)	k:Ubiquitination-GG,mOxidized methionine	18.86	633.39	2288.28	242.255	-721.6	P04146	Copia protein
1521	17K03_COLLAB-IT_CTRL_013.2986.2986.0	4	7.92	73	15400000	99	2	0	0	0	M478m	466	(K)	SCLIENFAVGVSmRPKSSAELGSVQFK	(T)	C:Carbamidomethylation,m:Oxidized methionine	18.6	740.41	2941.49	17.1271	382.7	Q9VIP0	Protein nessun dorma
1526	17K03_COLLAB-IT_CTRL_032.2955.2955.0	5	7.92	64.3	13500000	99	2	2	2	0	K739k K746k	723	(K)	VIVLLQSDTTELQEAVkVRECQEk	(A)	C:Carbamidomethylation,k:Ubiquitination-GG	18.2	609.15	2815.49	226.234	-608.8	Q05192	Nuclear hormone receptor FTZ-F1 beta
1527	17K03_COLLAB-IT_CTRL_032.2350.2350.0	3	7.92	68.8	18800000	99	2	2	2	0	M520m K526k K529k	517	(R)	VQPmITSPIkLNk	(L)	m:Oxidized methionine,kUbiquitination-GG	14.47	571.42	1468.86	243.39	-403.5	A1ZBE8	Protein dopey-1 homolog
1529	17K03_COLLAB-IT_CTRL_012.3134.3134.0	5	7.91	61.9	10700000	99	2	0	0	0	M668m	638	(R)	IETVHQWTKKVIIYRPGGEEGSGCSSGDLQmPVIR	(I)	C:Carbamidomethylation,m:Oxidized methionine	19.47	789.99	3927.98	17.9365	492	Q09147	Fibroblast growth factor receptor homolog 2
1530	17K03_COLLAB-IT_CTRL_022.3012.3012.0	4	7.91	80.4	33500000	99	2	2	2	0	K273k M282m K289k	269	(R)	HTNGkHLVSHSSNmVLALQSk	(L)	k:Ubiquitination-GG,mOxidized methionine	18.39	633.41	2288.19	242.425	-654.2	Q24509	Syntaxin-5
1535	17K03_COLLAB-IT_CTRL_032.3557.3557.0	5	7.91	79.2	9080000	99	1	1	1	0	M446m K472k	431	(R)	ESNRQDLTFQGSGYNmSPLGVSGVPGLGGLVAGGVAGVAVAk	(N)	m:Oxidized methionine,kUbiquitination-GG	22.09	830.64	4017.05	132.121	502.1	P13709	Homeotic protein female sterile
1545	17K03_COLLAB-IT_CTRL_033.2712.2712.0	4	7.9	61.6	10900000	99	3	0	0	0	M220m	213	(K)	HILFLHNmTKTNSNFESKFVK	(F)	m:Oxidized methionine	16.68	638.29	2535.32	14.8205	-460.5	P28466	Protein Wnt-5
1547	17K03_COLLAB-IT_CTRL_032.3725.3725.0	4	7.9	60.2	10100000	99	1	1	1	0	K509k	489	(R)	MLHARYSAYVSDNPECSIQLk	(K)	C:Carbamidomethylation,k:Ubiquitination-GG	23.15	650.31	2482.18	116.033	765.9	Q9VI58	Terminal uridylyltransferase Tailor
1553	17K03_COLLAB-IT_CTRL_022.1680.1724.0	3	7.89	90.8	11500000	99	0	0	0	0	M893m	886	(K)	TIRASLAmQR	(Q)	m:Oxidized methionine	10.25	388.27	1146.64	16.1543	137	Q24418	Glutamate [NMDA] receptor subunit 1
1559	17K03_COLLAB-IT_CTRL_012.1873.1879.0	4	7.88	73.6	5420000	99	2	0	0	0	M1m	1	(-)	mTTSTIKPTGGDEVPPAGVVGNVADVGVAASLTK	(R)	m:Oxidized methionine	11.48	814.96	3239.68	17.1354	350.2	Q0KHU5	Lysophosphatidylcholine acyltransferase
1560	17K03_COLLAB-IT_CTRL_021.2332.2332.0	4	7.88	92.4	16700000	99	3	0	0	0	M345m	340	(R)	KVDKQmALLEADDPVSQLHK	(C)	m:Oxidized methionine	14.42	571.17	2265.19	16.4674	207.1	P28159	Suppressor of hairless protein
1572	17K03_COLLAB-IT_CTRL_033.1657.1663.0	3	7.86	70.5	6730000	99	1	0	0	0	M195m M197m M198m	195	(R)	mAmmHRSSAAAAAEETSHAFKR	(L)	m:Oxidized methionine	10	814.28	2391.11	49.714	708.5	Q01295	Broad-complex core protein isoforms 1/2/3/4/5
1573	17K03_COLLAB-IT_CTRL_022.1965.1965.0	3	7.85	89.2	4750000	99	1	1	1	0	K138k	138	(K)	kGDVGPGAGEVEFR	(G)	k:Ubiquitination-GG	12.04	511.24	1417.71	113.998	-29.1	Q9VWG3	40S ribosomal protein S10b
1574	17K03_COLLAB-IT_CTRL_031.2997.2997.0	5	7.85	61	38200000	99	2	2	2	0	M127m K143k M147m K166k	127	(R)	mGLRAYVCIQLGVPGGkSGCmFTPIPVELTSYEPETFGLk	(L)	C:Carbamidomethylation,m:Oxidized methionine,kUbiquitination-GG	18.56	933.12	4403.19	258.376	-364.6	Q9VN50	Eukaryotic translation initiation factor 3 subunit F-1
1575	17K03_COLLAB-IT_CTRL_013.4482.4500.0	5	7.84	70.6	2460000	99	1	1	1	0	K127k	98	(R)	VAAGATPTTVSRASSNSSLATSTSTSLAPk	(S)	k:Ubiquitination-GG	28.08	587.58	2821.45	112.417	-554.1	Q24523	Protein bunched, class 2/F/G isoform
1576	17K03_COLLAB-IT_CTRL_021.2023.2023.0	5	7.84	68.1	3990000	99	3	0	0	0	M58m M62m	56	(K)	TLmGQVmKEAAFSLAEVKFTTGDINQIVLQNVTK	(A)	m:Oxidized methionine	12.52	752.64	3724.97	34.2057	589.4	Q9NEF6	Probable V-type proton ATPase subunit D 2
1583	17K03_COLLAB-IT_CTRL_012.4394.4394.0	5	7.82	68.1	7200000	99	2	2	2	0	K861k K891k	853	(R)	SEGPPVLCkTDQVGEICVTSGSTSASYFGLDGMTNSTFk	(V)	C:Carbamidomethylation,k:Ubiquitination-GG	27.54	872.18	4127.89	228.983	205.8	Q9W0S9	Disco-interacting protein 2
1590	17K03_COLLAB-IT_CTRL_031.2598.2598.0	4	7.81	73.3	4010000	99	1	1	1	0	K775k	773	(R)	RSkVSGSPVQVR	(N)	k:Ubiquitination-GG	16.04	353.62	1299.75	111.709	-1653.5	P00967	Trifunctional purine biosynthetic protein adenosine-3
1596	17K03_COLLAB-IT_CTRL_023.2564.2564.3	3	7.8	64.6	70400000	99	1	1	1	0	K88k	79	(K)	YGEIESINVkTDPQTGRSR	(G)	k:Ubiquitination-GG	15.78	755.69	2150.08	114.972	410.1	Q08473	RNA-binding protein squid
1597	17K03_COLLAB-IT_CTRL_032.2640.2640.0	5	7.8	72.7	11400000	99	0	0	0	0	M401m	396	(K)	FHIYNmGGEPGFELERAR	(F)	m:Oxidized methionine	16.24	428.92	2123.01	17.5582	730.3	P32866	G protein-coupled receptor kinase 2
1599	17K03_COLLAB-IT_CTRL_011.2554.2554.0	5	7.79	68.6	7370000	99	2	0	0	0	M155m	147	(K)	QLIVGVNKmDSTEPPYSEARYEEIK	(K)	m:Oxidized methionine	15.85	583.29	2896.44	15.9812	-4.7	P05303	Elongation factor 1-alpha 2
1608	17K03_COLLAB-IT_CTRL_033.3110.3110.0	3	7.78	68.2	6400000	99	1	1	1	0	M95m K104k	87	(R)	LSTPQDDAmCGINLDLGk	(V)	C:Carbamidomethylation,m:Oxidized methionine,kUbiquitination-GG	19.17	694.08	1947.91	132.31	1092.5	Q9VH14	Tissue inhibitor of metalloproteinase
1620	17K03_COLLAB-IT_CTRL_023.3690.3690.0	4	7.76	78.1	4990000	99	2	2	2	0	K228k K231k	209	(K)	FLLLLQTLAAATTRLSLSPkNYk	(Q)	k:Ubiquitination-GG	22.79	698.08	2562.5	226.796	-462.3	P09208	Insulin-like receptor
1622	17K03_COLLAB-IT_CTRL_023.3299.3299.0	4	7.76	60.8	19500000	99	2	2	2	0	K11k K24k	1	(-)	MDEILFPTQQkSNSLSDGDDVDLkFFQSASGER	(K)	k:Ubiquitination-GG	20.31	983.52	3704.74	226.32	-449.3	P49906	Transcription initiation factor TFIID subunit 11
1626	17K03_COLLAB-IT_CTRL_023.2356.2356.0	5	7.76	76.5	7730000	99	2	2	2	0	K85k K88k	72	(K)	SWRSYMDELDHQAkQFk	(F)	k:Ubiquitination-GG	14.5	480.57	2169.02	229.803	715.7	P18106	Tyrosine-protein kinase Fer
1629	17K03_COLLAB-IT_CTRL_012.3475.3475.0	5	7.75	67.7	8010000	99	1	1	1	0	K179k	176	(R)	AAVkMANIDSMCNFMFTNPRDPAGQTLVAPDELLYFTDMCAGPGGFSEYVLYR	(K)	C:Carbamidomethylation,k:Ubiquitination-GG	21.72	1214.26	5951.73	115.536	246.2	Q9W4N2	Cap-specific mRNA (nucleoside-2'-O-)-methyltransferase 1
1632	17K03_COLLAB-IT_CTRL_013.3660.3660.0	3	7.75	77.1	4710000	99	1	1	1	0	K369k	345	(K)	VPDPRPGSCHNDSRALPDPTLNFIk	(T)	C:Carbamidomethylation,k:Ubiquitination-GG	22.9	973.49	2803.39	115.061	348.8	Q24322	Semaphorin-1A
1633	17K03_COLLAB-IT_CTRL_021.2888.2888.0	4	7.75	75.2	7660000	99	1	0	0	0	M298m	275	(R)	VKGADAAVSSVLTFLDSHVECNEmWLEPLLERVR	(E)	C:Carbamidomethylation,m:Oxidized methionine	17.56	972.47	3870.95	15.9065	-22.8	Q6WV19	Polypeptide N-acetylgalactosaminyltransferase 2
1640	17K03_COLLAB-IT_CTRL_021.2558.2558.0	4	7.74	62.9	21700000	99	2	2	2	0	M318m K320k K322k M337m	318	(K)	mSkSkHNVVDPLQAAQQYTmEGLR	(Y)	m:Oxidized methionine,kUbiquitination-GG	15.74	748.91	2731.36	261.253	393.3	Q9VFL5	Methionine--tRNA ligase, mitochondrial
1642	17K03_COLLAB-IT_CTRL_012.3695.3695.0	3	7.73	83.9	5140000	99	1	1	1	0	K98k	80	(R)	CNLRCDYCMPAEGVPLQPk	(N)	C:Carbamidomethylation,k:Ubiquitination-GG	23.13	808.31	2308.03	114.881	346	Q8IQF1	Molybdenum cofactor biosynthesis protein 1
1646	17K03_COLLAB-IT_CTRL_023.4305.4305.0	4	7.73	75.5	4270000	99	2	0	0	0	M864m M866m	837	(R)	YIYVGEYQANARSGYGVIEDLVSGDKYmGmFADNK	(R)	m:Oxidized methionine	26.66	990.08	3923.82	33.4727	374.7	Q9VNZ8	Alsin homolog
1650	17K03_COLLAB-IT_CTRL_023.2765.2765.0	5	7.72	71.6	9130000	99	1	1	1	0	M1649m M1665m K1668k M1671m	1649	(K)	mRSIALPPELEQQVATmSSkTAmLTR	(Q)	m:Oxidized methionine,kUbiquitination-GG	16.99	610.92	2889.5	161.071	-313.5	P29993	Inositol 1,4,5-trisphosphate receptor
1651	17K03_COLLAB-IT_CTRL_033.2495.2495.0	4	7.72	73.9	4640000	99	2	2	2	0	M694m K701k K702k	678	(K)	AGGGAAGGGVGGAHALmNARNAAkk	(K)	m:Oxidized methionine,kUbiquitination-GG	15.32	603.12	2164.11	245.343	523.8	P16395	Muscarinic acetylcholine receptor DM1
1653	17K03_COLLAB-IT_CTRL_031.2401.2401.0	4	7.72	92.9	23000000	99	1	0	0	0	M219m M223m	217	(R)	RPmNAFmVWAK	(I)	m:Oxidized methionine	14.84	346.88	1350.68	33.8172	1319.9	P40657	Putative transcription factor SOX-15
1658	17K03_COLLAB-IT_CTRL_032.1863.1863.0	4	7.71	82	12700000	99	0	0	0	0	M2624m	2616	(K)	ERSCDSLVmCIVTTLNQGLR	(N)	C:Carbamidomethylation,m:Oxidized methionine	11.38	592.87	2352.15	16.3113	133.6	P29993	Inositol 1,4,5-trisphosphate receptor
1661	17K03_COLLAB-IT_CTRL_032.5069.5075.0	4	7.71	60.2	3370000	99	1	1	1	0	K2025k	2000	(R)	SQVAGNAGAGAVANVPRRFTDLFYNk	(L)	k:Ubiquitination-GG	31.62	709.9	2723.4	113.177	-305.3	Q70PP2	Serine/threonine-protein kinase Smg1
1665	17K03_COLLAB-IT_CTRL_033.2544.2544.0	5	7.7	68.4	5560000	99	2	2	2	0	K604k K613k	593	(R)	CASEEDAGTIHkEINGWWFDkR	(L)	C:Carbamidomethylation,k:Ubiquitination-GG	15.64	576.62	2649.22	229.856	614.8	Q7JRE4	Inner nuclear membrane protein Man1
1676	17K03_COLLAB-IT_CTRL_012.2778.2778.0	4	7.68	68.8	10600000	99	3	0	0	0	M4056m	4054	(R)	ESmPESGKAESIKGDQSSLASK	(E)	m:Oxidized methionine	17.18	571.3	2266.09	16.0914	42.3	Q9W596	Microtubule-associated protein futsch
1679	17K03_COLLAB-IT_CTRL_022.3514.3514.0	4	7.68	79.7	42800000	99	2	0	0	0	M180m	178	(K)	SKmSAAAAIAAEAGNGKGR	(G)	m:Oxidized methionine	21.55	445.22	1760.91	16.951	537.8	Q9V4Q8	Probable U2 small nuclear ribonucleoprotein A'
1681	17K03_COLLAB-IT_CTRL_031.1796.1796.0	3	7.68	73	16700000	99	1	1	1	0	K244k	219	(R)	SSLFSRSDSSATTTSSSGGGTFTGGk	(R)	k:Ubiquitination-GG	11.03	861.48	2470.13	112.293	-677.8	Q9W4S9	cAMP-specific 3',5'-cyclic phosphodiesterase, isoforms N/G
1684	17K03_COLLAB-IT_CTRL_022.2209.2209.0	4	7.67	85.9	10300000	99	1	1	1	0	K867k M869m	860	(K)	EHLDNLNkGmVSIV	(-)	k:Ubiquitination-GG,mOxidized methionine	13.59	425.85	1568.81	131.568	899.9	Q9W2Q1	Retinal homeobox protein Rx
1688	17K03_COLLAB-IT_CTRL_031.3192.3192.0	5	7.67	64.5	11000000	99	0	0	0	0	M193m M210m	185	(R)	ERQQLFLImHFTAWWIPFIEWTTLSmTFVWNFVDIFLILICR	(G)	C:Carbamidomethylation,m:Oxidized methionine	19.79	1080.01	5361.77	34.2562	420	P83295	Gustatory receptor for sugar taste 64c
1695	17K03_COLLAB-IT_CTRL_013.4813.4813.0	5	7.65	76.2	2340000	99	2	0	0	0	M406m M410m	401	(K)	LEIDKmTLTmNVELPESFSLELK	(N)	m:Oxidized methionine	30.16	543.03	2680.38	30.7385	-461.5	P32865	G protein-coupled receptor kinase 1
1699	17K03_COLLAB-IT_CTRL_011.3044.3044.0	4	7.64	69.4	6890000	99	2	0	0	0	M454m M459m	453	(R)	LmKLDGmEIEEENFLEPPTKR	(S)	m:Oxidized methionine	18.95	638.01	2519.25	29.7661	-872.4	O61267	Ovarian-specific serine/threonine-protein kinase Lok
1703	17K03_COLLAB-IT_CTRL_021.2706.2711.0	4	7.64	92.5	91300000	99	1	0	0	0	M45m M63m	33	(R)	TVPKPRSSISSSmSGTALPPTQAPVTSSTTmR	(T)	m:Oxidized methionine	16.56	823.93	3260.66	32.0368	14.3	Q01083	Protein spitz
1709	17K03_COLLAB-IT_CTRL_011.4291.4291.0	4	7.63	72.1	4320000	99	1	1	1	0	M343m M348m M357m K361k	331	(K)	SNGLLSSLPYLAmWLFSmFISVVADWmISSk	(R)	m:Oxidized methionine,kUbiquitination-GG	26.95	914.36	3493.76	160.657	-375	Q9V7S5	Putative inorganic phosphate cotransporter
1712	17K03_COLLAB-IT_CTRL_022.3182.3182.0	5	7.63	65.3	10900000	99	0	0	0	0	M80m	67	(R)	SRPTWPPSSAGGDmTTIELISSDDEPSVEETEGGNAAGRGRAR	(N)	m:Oxidized methionine	19.45	892.74	4444.07	15.6003	-88.5	Q9W4D2	RNA-binding protein 4F
1718	17K03_COLLAB-IT_CTRL_021.3419.3419.0	5	7.62	67.9	20600000	99	1	0	0	0	M28m M29m M33m	15	(K)	ETHQINVDCNELQmmGQFmCPDPARGQIDPK	(T)	C:Carbamidomethylation,m:Oxidized methionine	20.89	742.54	3659.62	49.0541	288.3	Q9W2H1	TM2 domain-containing protein CG10795
1724	17K03_COLLAB-IT_CTRL_023.2378.2378.0	4	7.61	89.1	11600000	99	1	0	0	0	M138m	120	(K)	SIGIVFIGNFERSAPSAQmLQNAK	(D)	m:Oxidized methionine	14.63	649.18	2578.34	15.3536	-247.3	Q70PY2	Peptidoglycan-recognition protein SB1
1726	17K03_COLLAB-IT_CTRL_031.3088.3088.0	3	7.61	64.3	19800000	99	1	1	1	0	K468k	459	(R)	RPDIYPNPTkFDPDNFLPER	(M)	k:Ubiquitination-GG	19.13	848.99	2431.2	113.751	-114.6	Q9V3S0	Cytochrome P450 4g1
1730	17K03_COLLAB-IT_CTRL_021.3359.3359.0	3	7.6	66.5	36800000	99	2	0	0	0	M116m M118m	106	(K)	KLGSNAYPFVmQmPPSSPASVVLQQK	(A)	m:Oxidized methionine	20.51	946.98	2804.45	34.4781	876.5	P15372	Phosrestin-2
1733	17K03_COLLAB-IT_CTRL_013.2628.2628.0	4	7.59	62.1	7030000	99	1	0	0	0	M306m M311m	290	(R)	AGFLTLSNVADTSPDTmWGAFmFFK	(M)	m:Oxidized methionine	16.33	696.85	2754.29	30.0839	-684.5	Q9VSF2	Mediator of RNA polymerase II transcription subunit 24
1735	17K03_COLLAB-IT_CTRL_011.2925.2925.0	4	7.59	62.5	9300000	99	1	0	0	0	M309m M318m	303	(K)	EQHAQEmADLADNVEmITLDK	(E)	m:Oxidized methionine	18.2	609.1	2401.1	32.2772	118.1	P13496	Dynactin subunit 1
1741	17K03_COLLAB-IT_CTRL_012.1756.1756.0	4	7.59	90.1	1830000	99	1	1	1	0	M1820m K1830k	1808	(K)	TVAIGTQGSGHSmSVASTTTPGk	(Q)	m:Oxidized methionine,kUbiquitination-GG	10.75	576.78	2175.07	129.027	-438.7	Q9VMJ7	Lysine-specific demethylase lid
1744	17K03_COLLAB-IT_CTRL_021.4568.4572.0	4	7.59	89.4	10800000	99	1	0	0	0	M1558m	1557	(R)	QmSLTQSEPDSDK	(D)	m:Oxidized methionine	28.12	371.11	1465.65	15.7707	-151.4	A8DYE2	Transient receptor potential cation channel trpm
1747	17K03_COLLAB-IT_CTRL_013.3013.3013.0	3	7.58	66.2	4100000	99	1	1	1	0	K107k	104	(K)	EMLkLLDFHNIR	(G)	k:Ubiquitination-GG	18.77	548.73	1528.83	115.345	791.9	P17704	40S ribosomal protein S17
1750	17K03_COLLAB-IT_CTRL_011.3064.3064.0	4	7.58	83.3	5540000	99	2	2	2	0	K424k K426k M429m	407	(K)	QLHRVLVSSDGPNDNVIkLkPPmCFNR	(E)	C:Carbamidomethylation,k:Ubiquitination-GG,mOxidized methionine	19.08	845.42	3134.64	244.023	-17	Q9VU95	Alanine--glyoxylate aminotransferase 2-like
1751	17K03_COLLAB-IT_CTRL_013.2167.2167.0	4	7.58	67.5	4320000	99	3	0	0	0	M56m	42	(K)	SESASPETKPKVEPmSVDSEEK	(T)	m:Oxidized methionine	13.42	602.56	2391.12	16.095	41.6	Q9W1H4	DNA ligase 1
1754	17K03_COLLAB-IT_CTRL_011.3558.3558.0	4	7.57	84.6	13700000	99	1	1	1	0	K1261k M1282m	1259	(K)	EAkAAVGSVSDGATSSTADGQSGmREIHER	(C)	k:Ubiquitination-GG,mOxidized methionine	22.34	784.92	3004.4	132.256	707.1	Q9VGI8	Bloom syndrome protein homolog
1755	17K03_COLLAB-IT_CTRL_011.2237.2237.0	4	7.57	87.8	12400000	99	2	0	0	0	M255m	252	(K)	EHSmTRKPLGSRTSQK	(D)	m:Oxidized methionine	13.89	464.89	1842.96	13.5779	-1301.9	Q9NK54	Protein chiffon
1758	17K03_COLLAB-IT_CTRL_023.2923.2923.0	2	7.57	61.2	21700000	99	1	1	1	0	K939k	928	(K)	IQEALEAERAAk	(E)	k:Ubiquitination-GG	17.95	721.94	1328.72	114.156	78.3	Q01989	Myosin heavy chain 95F
1759	17K03_COLLAB-IT_CTRL_023.3402.3402.0	4	7.57	72.3	10700000	99	1	0	0	0	M1231m	1217	(R)	QTEKSNYNQIIDSSmTSLPELNVDSIYPR	(N)	m:Oxidized methionine	20.96	840.9	3342.62	17.9623	585.4	P19538	Transcriptional activator cubitus interruptus
1762	17K03_COLLAB-IT_CTRL_031.2493.2493.0	3	7.57	78.8	3460000	99	1	1	1	0	K36k	16	(K)	NSQTVSPGAITTGNGAPIGIkDASQTVGPR	(G)	k:Ubiquitination-GG	15.39	1003.64	2894.5	114.409	121.6	P17336	Catalase
1763	17K03_COLLAB-IT_CTRL_021.2012.2012.0	5	7.56	73.7	12600000	99	0	0	0	0	M364m	359	(R)	DFAINmGIVSREADLFADDIFHYER	(R)	m:Oxidized methionine	12.45	593.09	2944.39	17.0275	348.7	Q9XZ14	Protein gone early
1768	17K03_COLLAB-IT_CTRL_013.2134.2134.0	5	7.55	93.5	4280000	99	0	0	0	0	M134m	131	(R)	LRDmDANVLPVLLR	(L)	m:Oxidized methionine	13.2	328.51	1624.92	13.6006	-1461.3	Q24169	Origin recognition complex subunit 5
1769	17K03_COLLAB-IT_CTRL_021.2410.2410.0	3	7.55	66.3	16500000	99	1	0	0	0	M89m	84	(K)	DLIQFmYCGEVNVK	(Q)	C:Carbamidomethylation,m:Oxidized methionine	14.89	577.64	1715.81	15.0923	-521.5	Q86B87	Modifier of mdg4
1770	17K03_COLLAB-IT_CTRL_021.3979.3979.0	4	7.55	68.7	5300000	99	1	1	1	0	M901m M911m K917k	894	(R)	EALAPAGmVGLERLYAHmLADELk	(R)	m:Oxidized methionine,kUbiquitination-GG	24.42	686.97	2598.34	146.516	176.2	Q9VUY8	WASH complex subunit homolog 5
1773	17K03_COLLAB-IT_CTRL_031.4841.4841.0	4	7.55	86.2	2040000	99	1	1	1	0	K285k	259	(K)	LRNIAETGFFAYNLGTGVGYSVLDMVk	(A)	k:Ubiquitination-GG	30.21	763.01	2935.5	113.516	-172.8	Q9W0P5	UDP-glucose 4-epimerase
1777	17K03_COLLAB-IT_CTRL_032.4366.4366.0	3	7.54	78.4	4790000	99	1	0	0	0	M339m	328	(R)	TWLPAGEALLQmIAIHLPSPVVAQK	(Y)	m:Oxidized methionine	27.19	901.14	2683.5	17.9051	707.1	P13060	Elongation factor 2
1778	17K03_COLLAB-IT_CTRL_033.2036.2036.0	4	7.54	60.1	5670000	99	1	1	1	0	K372k	354	(K)	VDNILNRLHVAMPAPRDDk	(L)	k:Ubiquitination-GG	12.38	573.01	2174.15	114.868	360.6	Q9V411	Nucleolar GTP-binding protein 1
1779	17K03_COLLAB-IT_CTRL_032.2573.2573.0	4	7.54	61.2	16700000	99	1	1	1	0	K25k M38m	20	(R)	VSTTTkVVLFSLTAGVALmSVLSRFLR	(R)	k:Ubiquitination-GG,mOxidized methionine	15.81	757.47	2896.67	130.189	49.9	Q9W3F7	Mitoguardin
1781	17K03_COLLAB-IT_CTRL_032.2605.2605.0	4	7.53	92	5520000	99	1	0	0	0	M648m	641	(R)	QQRSLSRmDNLCLGHASVGLLLDALEAQK	(T)	C:Carbamidomethylation,m:Oxidized methionine	16.01	810.8	3223.67	16.5107	159.2	P42286	Protein three rows
1784	17K03_COLLAB-IT_CTRL_013.2071.2071.0	3	7.52	65.7	18500000	99	1	0	0	0	M170m	168	(K)	SEmHGTHGSLNGANSK	(R)	m:Oxidized methionine	12.8	548.84	1626.73	17.7766	1083.4	Q94527	Nuclear factor NF-kappa-B p110 subunit
1785	17K03_COLLAB-IT_CTRL_023.3355.3355.0	4	7.52	86.4	15500000	99	0	0	0	0	M229m	217	(K)	AVDSGRASATVDmWTDQYVQR	(N)	m:Oxidized methionine	20.67	594.2	2356.1	17.6795	709.7	P12258	Transposable element Hobo transposase
1789	17K03_COLLAB-IT_CTRL_011.1836.1836.0	4	7.51	66.3	2020000	99	1	0	0	0	M1020m	1000	(K)	SRHRNSLPNVSVNDIFDDLQmK	(L)	m:Oxidized methionine	11.31	651.67	2585.29	18.3693	911.9	Q8IMC6	Tau-tubulin kinase homolog Asator
1790	17K03_COLLAB-IT_CTRL_021.2740.2740.0	3	7.51	79.5	45100000	99	2	0	0	0	M123m	120	(K)	EAKmGATAGGGATGAASK	(F)	m:Oxidized methionine	16.75	518.33	1535.75	17.2272	793.5	A1Z9R4	Zinc finger protein 423 homolog
1791	17K03_COLLAB-IT_CTRL_022.2453.2453.0	3	7.51	74.6	20900000	99	1	0	0	0	M1061m M1064m M1066m	1052	(R)	ILHSQSSLGmTTmEmPLTDSDK	(L)	m:Oxidized methionine	15.08	824.71	2422.13	49.9856	809.4	Q9VX31	Integrator complex subunit 2
1794	17K03_COLLAB-IT_CTRL_012.1349.1349.0	4	7.5	100	4020000	99	1	0	0	0	M671m	669	(R)	DVmRNESDQGSGNAPAASAGAGTSAGASTK	(W)	m:Oxidized methionine	8.21	696.34	2765.24	17.0991	396.8	Q9VLT5	Protein purity of essence
1798	17K03_COLLAB-IT_CTRL_033.3364.3364.0	3	7.5	94.1	8390000	99	1	1	1	0	M2169m K2187k	2166	(R)	GPVmEWYDALSHHIRSSALVRk	(W)	m:Oxidized methionine,kUbiquitination-GG	20.82	895.14	2552.32	131.086	390.7	P55824	Probable ubiquitin carboxyl-terminal hydrolase FAF
1800	17K03_COLLAB-IT_CTRL_013.3565.3565.0	3	7.49	75	8760000	99	1	1	1	0	K598k	592	(R)	SPLFGGkQMSSLTYR	(Q)	k:Ubiquitination-GG	22.31	595.31	1671.85	112.063	-1109.8	O18475	DNA polymerase theta
1804	17K03_COLLAB-IT_CTRL_013.2316.2316.0	5	7.48	75.8	4670000	99	2	0	0	0	M670m	660	(K)	NELPSDEDEQmLVVEEEQQQQTVKK	(I)	m:Oxidized methionine	14.39	598.6	2973.4	15.5715	-141.6	Q9U1H0	Putative transcription factor capicua
1814	17K03_COLLAB-IT_CTRL_021.1769.1769.0	5	7.47	78.5	9250000	99	2	0	0	0	M502m	491	(R)	ALIATQKNIAAmVPGFRFNLGFSGK	(Y)	m:Oxidized methionine	10.92	533.95	2651.45	14.2719	-646.4	Q9V3L1	Bifunctional heparan sulfate N-deacetylase/N-sulfotransferase
1816	17K03_COLLAB-IT_CTRL_031.3123.3123.0	3	7.47	63.8	10900000	99	3	0	0	0	M245m	238	(K)	YKKLALEmQDEVK	(K)	m:Oxidized methionine	19.35	538.36	1594.85	18.2145	1376	Q9W5N0	Cytochrome c oxidase assembly factor 7 homolog
1817	17K03_COLLAB-IT_CTRL_013.1866.1866.0	4	7.46	68.2	19400000	99	3	0	0	0	M345m	339	(K)	KPFKIVmESQFPSELFK	(-)	m:Oxidized methionine	11.52	519.03	2055.1	17.9998	967.1	Q8T4E1	Putative GPI-anchor transamidase
1819	17K03_COLLAB-IT_CTRL_013.3042.3042.0	5	7.46	67.1	8390000	99	1	1	1	0	K94k	89	(K)	YRDCLkIANGEVIDYNADGNVHGER	(R)	C:Carbamidomethylation,k:Ubiquitination-GG	18.95	599.56	2878.35	115.417	459	Q9VM60	Mini-chromosome maintenance complex-binding protein
1822	17K03_COLLAB-IT_CTRL_011.3145.3145.0	4	7.45	74.8	4960000	99	1	1	1	0	M315m K337k	314	(K)	LmRNQSDTIATAAPSFLHSQPTNkAR	(G)	m:Oxidized methionine,kUbiquitination-GG	19.62	746.84	2855.46	128.88	-387.9	P18490	Protein pecanex
1824	17K03_COLLAB-IT_CTRL_033.3343.3343.0	4	7.45	74.2	14900000	99	1	1	1	0	K30k	20	(K)	IGIIGEANLDkPIYLAER	(M)	k:Ubiquitination-GG	20.69	525.99	1985.11	115.832	851.4	Q8IMU4	Purine nucleoside phosphorylase
1825	17K03_COLLAB-IT_CTRL_032.3229.3229.0	5	7.45	64.8	12900000	99	1	1	1	0	K45k	21	(R)	TGQGSGTGSTILGNGNSPGALGAGkVSSSLENHR	(Q)	k:Ubiquitination-GG	20	657.04	3168.56	112.608	-437.3	P12297	Protein suppressor of white apricot
1832	17K03_COLLAB-IT_CTRL_032.2914.2914.0	5	7.44	78.7	6760000	99	1	1	1	0	M334m K351k	331	(R)	QLHmELYPGWSARDNYGYVSk	(K)	m:Oxidized methionine,kUbiquitination-GG	17.94	529.31	2514.19	128.334	-644.8	P91943	Protein pangolin, isoforms A/H/I/S
1834	17K03_COLLAB-IT_CTRL_022.2544.2544.0	5	7.43	60.4	13400000	99	1	0	0	0	M120m	102	(K)	LNCGAAQPESDAEDEQSNmSGSSRRYAK	(S)	C:Carbamidomethylation,m:Oxidized methionine	15.62	615.24	3058.32	13.8484	-698.7	P28166	Zinc finger protein 1
1835	17K03_COLLAB-IT_CTRL_023.3247.3247.0	4	7.43	100	5490000	99	1	1	1	0	K24k	11	(K)	VELHAHLNGSLGIkSLCDLGER	(L)	C:Carbamidomethylation,k:Ubiquitination-GG	19.94	633.3	2418.26	111.922	-838.1	Q9VHH7	Adenosine deaminase-like protein
1836	17K03_COLLAB-IT_CTRL_021.4434.4434.0	3	7.43	62.9	6340000	99	2	0	0	0	M989m M991m	973	(K)	YPLLVDALTDILSITDmSmYSKEK	(D)	m:Oxidized methionine	27.28	926.83	2746.39	32.0825	33.4	Q9VLT5	Protein purity of essence
1840	17K03_COLLAB-IT_CTRL_033.2407.2407.0	3	7.43	89.1	24300000	99	0	0	0	0	M59m	58	(R)	VmHPSFANAGR	(T)	m:Oxidized methionine	14.73	401.44	1186.58	15.7269	-223	Q07171	Gelsolin
1841	17K03_COLLAB-IT_CTRL_013.3017.3024.0	3	7.42	81.8	15400000	99	1	0	0	0	M156m M161m	155	(K)	GmAGRPmTIPLALGK	(I)	m:Oxidized methionine	18.8	516.32	1512.84	34.1065	1368.3	P06002	Opsin Rh1
1844	17K03_COLLAB-IT_CTRL_013.1792.1792.0	4	7.42	76.8	4780000	99	2	0	0	0	M134m	126	(R)	RPDSPQNLmRHGEKALFTFK	(Q)	m:Oxidized methionine	11.06	598.06	2372.23	16.989	416.1	Q9VS59	Akirin
1845	17K03_COLLAB-IT_CTRL_022.4167.4167.0	3	7.42	76.5	10600000	99	1	0	0	0	M813m	810	(R)	HVCmVSDGSFSNWKPVSLNHLLER	(S)	C:Carbamidomethylation,m:Oxidized methionine	25.69	943.65	2812.37	16.5697	203.2	Q9Y103	Septin-interacting protein 1
1850	17K03_COLLAB-IT_CTRL_013.1706.1706.0	4	7.41	77.6	10100000	99	1	0	0	0	M392m	379	(K)	TPLRCNQCEFVTNmLLDLK	(A)	C:Carbamidomethylation,m:Oxidized methionine	10.51	592.73	2352.15	15.7473	-104.6	Q8MSG8	Aprataxin-like protein
1853	17K03_COLLAB-IT_CTRL_022.2993.2993.0	5	7.41	67.2	18400000	99	3	0	0	0	M1m M21m	1	(-)	mASGGDPKWQKDAADQNFDYmFK	(L)	m:Oxidized methionine	18.29	536.93	2650.17	30.4508	-574.1	P25228	Ras-related protein Rab-3
1854	17K03_COLLAB-IT_CTRL_023.1823.1823.0	5	7.41	74.4	22000000	99	0	0	0	0	M88m	81	(R)	QAVIQGCmACQNQRCGRLLTGR	(S)	C:Carbamidomethylation,m:Oxidized methionine	11.13	519.02	2577.24	13.8332	-834.3	Q9W2C3	L-asparaginase-like protein CG4372
1855	17K03_COLLAB-IT_CTRL_021.3101.3101.0	4	7.41	72.2	55500000	99	2	0	0	0	M478m	457	(R)	VGQLSVKTAIVHILSNYQVEQmK	(K)	m:Oxidized methionine	18.85	650.63	2585.41	14.0862	-734.3	Q9VQD2	Probable cytochrome P450 309a1
1856	17K03_COLLAB-IT_CTRL_033.4298.4298.0	3	7.41	71.9	3750000	99	2	2	2	0	K643k M650m K652k	642	(K)	FkTQLGELmEkLEQNGTNFIR	(C)	k:Ubiquitination-GG,mOxidized methionine	26.73	914.44	2496.29	245.014	340.4	Q01989	Myosin heavy chain 95F
1858	17K03_COLLAB-IT_CTRL_011.2484.2484.0	3	7.4	82.4	4540000	99	1	1	1	0	K36k	16	(K)	NSQTVSPGAITTGNGAPIGIkDASQTVGPR	(G)	k:Ubiquitination-GG	15.41	1004.08	2894.5	115.729	560.1	P17336	Catalase
1863	17K03_COLLAB-IT_CTRL_033.3758.3758.0	5	7.4	69	7210000	99	2	0	0	0	M548m	530	(R)	RKQRPNSLESSAESEASGmDVDPSNPGQVDAVSSTANFK	(S)	m:Oxidized methionine	23.32	822.39	4092.92	15.0046	-241.1	M9NEY8	DNA N6-methyl adenine demethylase
1871	17K03_COLLAB-IT_CTRL_021.3855.3855.0	4	7.38	84.3	10100000	99	1	1	1	0	K307k	277	(K)	ARLALLVANGVDVIILDSSQGNSVYQVEMIk	(Y)	k:Ubiquitination-GG	23.63	857.61	3315.8	111.62	-706.9	Q07152	Inosine-5'-monophosphate dehydrogenase
1880	17K03_COLLAB-IT_CTRL_023.2785.2785.2	2	7.37	70.3	11700000	99	1	1	1	0	K72k	60	(R)	ASFLAQNSSQVVk	(T)	k:Ubiquitination-GG	17.11	746.91	1378.73	114.08	25	Q9V3J1	V-type proton ATPase subunit H
1881	17K03_COLLAB-IT_CTRL_021.3729.3729.0	5	7.37	61	12000000	99	1	1	1	0	K166k M172m	142	(R)	GVIVNTASVAAFDGQIGQAAYSASkAAVVGmTLPIARDLSTQGIR	(I)	k:Ubiquitination-GG,mOxidized methionine	22.83	921.69	4475.37	129.049	-214.7	O18404	3-hydroxyacyl-CoA dehydrogenase type-2
1884	17K03_COLLAB-IT_CTRL_023.3591.3591.0	4	7.37	71.7	13600000	99	2	0	0	0	M402m	389	(R)	LRPTTPAIDSAPVmPRKVLILGSGGLSIGQAGEFDYSGSQAIK	(A)	m:Oxidized methionine	22.17	1103.72	4398.35	13.5092	-563.4	P05990	CAD protein
1887	17K03_COLLAB-IT_CTRL_013.2183.2189.2	2	7.36	61	5990000	99	2	0	0	0	M272m	269	(R)	NDFmNLLIELKQK	(G)	m:Oxidized methionine	13.52	811.37	1605.87	15.8658	-79.6	P33270	Cytochrome P450 6a2
1890	17K03_COLLAB-IT_CTRL_022.2212.2212.0	5	7.36	89.7	4010000	99	2	2	2	0	M3059m K3072k K3073k	3043	(K)	QGPNSVISYSLQQPSPmFSIDPATGEVFSkkAVR	(F)	m:Oxidized methionine,kUbiquitination-GG	13.6	782.63	3665.86	243.258	-210.6	P33450	Cadherin-related tumor suppressor
1892	17K03_COLLAB-IT_CTRL_011.1970.1970.0	4	7.35	60.5	5050000	99	1	1	1	0	K6k	1	(-)	MDHAVkATRGRPLNTLR	(F)	k:Ubiquitination-GG	12.15	513.31	1936.07	114.152	53.4	P32870	Ca(2+)/calmodulin-responsive adenylate cyclase
1893	17K03_COLLAB-IT_CTRL_011.3478.3478.0	5	7.35	74.9	7510000	99	1	0	0	0	M1m M4m M11m	1	(-)	mTKmGGNLAVmLLSLFLSALATGNGNSIPTTTTPQGVFETR	(T)	m:Oxidized methionine	21.81	857.95	4240.18	45.5394	-570.6	Q9V3N1	Serine protease inhibitor 27A
1895	17K03_COLLAB-IT_CTRL_013.3034.3034.0	4	7.35	65.1	24500000	99	1	1	1	0	M255m K280k	254	(K)	QmRPGAFLVNTARGGLVDDETLALALk	(Q)	m:Oxidized methionine,kUbiquitination-GG	18.9	747.05	2856.54	128.638	-468.9	O46036	C-terminal-binding protein
1902	17K03_COLLAB-IT_CTRL_012.3385.3385.0	5	7.34	86	10700000	99	2	2	2	0	K33k K38k	1	(-)	MNQILLCSPILLLLFTVASCDSEQQLDSAMHLkSDSTk	(S)	C:Carbamidomethylation,k:Ubiquitination-GG	21.15	908.08	4307.14	229.228	251.7	P10333	Accessory gland-specific peptide 26Aa
1904	17K03_COLLAB-IT_CTRL_033.2722.2722.0	4	7.34	60.8	8800000	99	1	1	1	0	M867m K895k	865	(K)	EHmSHSSSPIDGQSLTESLHSHGINVRYLGk	(V)	m:Oxidized methionine,kUbiquitination-GG	16.74	884.15	3403.64	129.933	-29.6	A1ZAB5	Protein clueless
1905	17K03_COLLAB-IT_CTRL_012.1947.1947.0	5	7.33	100	2640000	99	1	1	1	0	M400m K430k	389	(R)	IARLVRLHSNQmEDVNEVYAGDIFALFGVDCASGDTFTTNPk	(N)	C:Carbamidomethylation,m:Oxidized methionine,kUbiquitination-GG	11.94	961.11	4671.26	130.26	46.3	Q9VM33	Elongation factor G, mitochondrial
1915	17K03_COLLAB-IT_CTRL_032.2601.2601.0	4	7.33	89.3	31800000	99	2	0	0	0	M180m	178	(K)	SKmSAAAAIAAEAGNGKGR	(G)	m:Oxidized methionine	15.99	445.1	1760.91	16.471	267.8	Q9V4Q8	Probable U2 small nuclear ribonucleoprotein A'
1924	17K03_COLLAB-IT_CTRL_031.3828.3828.0	4	7.32	86.8	7920000	99	1	0	0	0	M78m	59	(R)	LGATNPSKFDLEFFVNDLGmPAASAFENLGLLR	(Y)	m:Oxidized methionine	23.81	892.98	3554.8	14.0994	-531.1	Q9W1R5	Protein virilizer
1926	17K03_COLLAB-IT_CTRL_032.3565.3565.0	4	7.32	72.3	15100000	99	0	0	0	0	M395m	372	(K)	NLGGSSSGSIDLGGGGGNGNCNNmSNNGQSNNSSNNTSGFISR	(E)	C:Carbamidomethylation,m:Oxidized methionine	22.14	1045.48	4161.76	17.1416	274.4	Q8MSX1	Protein encore
1927	17K03_COLLAB-IT_CTRL_032.5892.5929.0	4	7.32	91.1	11700000	99	1	1	1	0	K537k	524	(R)	QQLISNYANRDNPk	(Y)	k:Ubiquitination-GG	36.83	445.05	1660.84	116.338	1291.4	Q9W484	Regulator of telomere elongation helicase 1 homolog
1930	17K03_COLLAB-IT_CTRL_022.2919.2919.0	4	7.31	83.8	33000000	99	0	0	0	0	M47m	30	(R)	HQQHQQHYGGSGTTGHTmVAR	(R)	m:Oxidized methionine	17.84	584.34	2318.06	16.279	121.7	Q27368	Transcription factor E2f1
1932	17K03_COLLAB-IT_CTRL_031.4234.4234.0	3	7.31	73	4220000	99	1	1	1	0	K119k M120m M124m M133m	118	(R)	EkmTQImFETFNSPAmYVAIQAVLSLYASGR	(T)	k:Ubiquitination-GG,mOxidized methionine	26.38	1220.92	3496.73	164.014	542.6	P53501	Actin-57B
1934	17K03_COLLAB-IT_CTRL_031.1424.1431.0	3	7.31	70.7	4720000	99	1	1	1	0	K1108k	1106	(R)	QIkELQAR	(I)	k:Ubiquitination-GG	8.7	367.25	985.579	114.156	103.3	P05661	Myosin heavy chain, muscle
1935	17K03_COLLAB-IT_CTRL_032.3993.3993.0	3	7.31	74.8	4310000	99	0	0	0	0	M372m	365	(R)	TAGSFLAmLRTFER	(-)	m:Oxidized methionine	24.84	538.72	1599.83	14.3143	-1041.2	Q9V568	Odorant receptor 45a
1939	17K03_COLLAB-IT_CTRL_023.3575.3575.0	5	7.3	60.7	13100000	99	1	0	0	0	M602m	580	(R)	ASEYLQLSIVASTDVLATVLEEmPSFPERESSILAVLK	(K)	m:Oxidized methionine	22.04	831.53	4136.17	17.4486	350	P91926	AP-2 complex subunit alpha
1941	17K03_COLLAB-IT_CTRL_021.3771.3771.0	5	7.3	62.3	11900000	99	2	2	2	0	K990k K995k	964	(R)	RNSTSSTATSSSSNGIGAPGHSMLDLkQSVNk	(Y)	k:Ubiquitination-GG	23.1	690.31	3219.57	227.955	-37.9	Q24459	Polycomb protein Pcl
1946	17K03_COLLAB-IT_CTRL_023.2825.2892.0	4	7.29	63.9	109000000	99	1	0	0	0	M367m	357	(K)	EISKSNVVDDmVASNR	(L)	m:Oxidized methionine	17.35	445.1	1763.86	13.5189	-1393.1	O97477	Inositol-3-phosphate synthase
1948	17K03_COLLAB-IT_CTRL_023.2650.2650.0	4	7.29	76.8	6350000	99	1	1	1	0	M231m K236k	211	(R)	YRNALLSLYNGDYNQWNIITmAVFPk	(C)	m:Oxidized methionine,kUbiquitination-GG	16.3	808.8	3104.57	127.612	-750.5	Q9VRX6	Innexin inx4
1949	17K03_COLLAB-IT_CTRL_032.2926.2926.0	4	7.29	83.8	7630000	99	2	2	2	0	M631m K648k K649k	604	(R)	ETASHVEFEPNSYYAAFSCELEASAYPmWSIISHLQDGTHAHLAkk	(I)	C:Carbamidomethylation,m:Oxidized methionine,kUbiquitination-GG	18.01	1368	5223.43	245.553	269.2	Q9W3M3	E3 ubiquitin-protein ligase Ubr3
1960	17K03_COLLAB-IT_CTRL_033.1911.1911.0	5	7.27	73.1	4790000	99	1	0	0	0	M1364m	1361	(K)	DVNmGGTTIAATSATQNPDDDVPSCSSAAK	(R)	C:Carbamidomethylation,m:Oxidized methionine	11.59	600.41	2981.31	16.711	238.9	Q9VDY1	Putative DNA helicase Ino80
1961	17K03_COLLAB-IT_CTRL_031.2260.2260.0	5	7.27	66.6	12000000	99	1	1	1	0	K276k	253	(R)	FRSVTHAYYRDAHALLLLYDVTNk	(T)	k:Ubiquitination-GG	14.02	596.93	2866.5	114.121	26.2	Q9VP48	Ras-related protein Rab-26
1965	17K03_COLLAB-IT_CTRL_012.2398.2398.0	4	7.26	60.2	9760000	99	1	0	0	0	M1m	1	(-)	mSKLIEVFLGNLWTQRFTFAR	(M)	m:Oxidized methionine	14.8	644.06	2557.38	15.8434	-58.9	Q9W5G6	Odorant receptor 1a
1968	17K03_COLLAB-IT_CTRL_021.3435.3435.0	3	7.26	74.2	17300000	99	1	0	0	0	M333m M339m	327	(K)	KILTLDmCRYLCmDEADR	(M)	C:Carbamidomethylation,m:Oxidized methionine	20.99	779	2303.07	31.9204	-29.8	Q9V3C0	ATP-dependent RNA helicase abstrakt
1972	17K03_COLLAB-IT_CTRL_031.3631.3631.0	4	7.26	86.2	3790000	99	1	0	0	0	M39m	33	(K)	LNEVLSmVCEEYNPVIPHKR	(A)	C:Carbamidomethylation,m:Oxidized methionine	22.57	611.72	2427.22	16.6423	264.9	Q9VT51	Probable insulin-like peptide 2
1973	17K03_COLLAB-IT_CTRL_033.2484.2490.0	5	7.26	70.1	8030000	99	0	0	0	0	M1m	1	(-)	mYHFVSEQTPEVR	(L)	m:Oxidized methionine	15.25	328.16	1622.76	14.0077	-1214.1	Q9VTE2	Protein suppressor of underreplication
1978	17K03_COLLAB-IT_CTRL_021.4287.4287.0	4	7.25	72.1	4480000	99	1	1	1	0	K96k	69	(K)	GLSPRIEDLLNFDDPSLGGMANGIGGCkLPPR	(F)	C:Carbamidomethylation,k:Ubiquitination-GG	26.36	870.35	3366.69	111.685	-677.9	P20482	Segmentation protein cap'n'collar
1983	17K03_COLLAB-IT_CTRL_033.2265.2288.0	5	7.25	65.6	19200000	99	1	0	0	0	M394m M404m M406m	388	(K)	AIFGDNmLRDCTFADTmEmKYLER	(V)	C:Carbamidomethylation,m:Oxidized methionine	13.87	595.82	2927.32	47.7514	-78.4	Q9V3S0	Cytochrome P450 4g1
1984	17K03_COLLAB-IT_CTRL_033.1456.1535.0	3	7.25	66.9	17500000	99	0	0	0	0	M381m	380	(R)	EmIGVDNCR	(V)	C:Carbamidomethylation,m:Oxidized methionine	8.78	371.01	1093.48	17.539	1389.8	Q9V3U0	Long-chain-fatty-acid--CoA ligase bubblegum-like
1987	17K03_COLLAB-IT_CTRL_011.3407.3407.0	5	7.24	63.6	5580000	99	0	0	0	0	M2224m	2212	(K)	LTEYLRLALTNYmAYCRLDSGFSSAAIYR	(I)	C:Carbamidomethylation,m:Oxidized methionine	21.36	687.94	3418.69	16.9787	286.3	Q5EAK6	Serine/threonine-protein kinase ATM
1989	17K03_COLLAB-IT_CTRL_022.3799.3799.0	5	7.24	65.3	38500000	99	0	0	0	0	M427m M452m	422	(R)	LQQSGmINTAEQPVEFVYITRGLLTNLSDAmAVLRVVADGQR	(R)	m:Oxidized methionine	23.38	927.76	4604.4	30.3746	-348.5	Q5BI42	VWFA and cache domain-containing protein CG16868
1992	17K03_COLLAB-IT_CTRL_033.2220.2220.0	5	7.24	77.5	3930000	99	1	0	0	0	M767m	754	(R)	GHVFEENQVVGTPmFVVKAYLPVNESFGFTADLR	(S)	m:Oxidized methionine	13.56	763.59	3797.9	16.0213	6.9	P13060	Elongation factor 2
1993	17K03_COLLAB-IT_CTRL_013.3493.3493.0	5	7.23	66.5	5740000	99	2	0	0	0	M55m	39	(R)	AELDGKEGLIPSNYIEmKNHDWYYGR	(I)	m:Oxidized methionine	21.85	623.33	3098.47	14.1532	-591.7	Q08012	Protein enhancer of sevenless 2B
2003	17K03_COLLAB-IT_CTRL_031.4505.4505.0	3	7.23	69.9	4730000	99	3	0	0	0	M327m	321	(R)	GGFDWKmLYKQLPVLPEDALDK	(S)	m:Oxidized methionine	28.09	861.13	2563.33	18.0489	795.7	Q8IA42	N-acetylgalactosaminyltransferase 4
2009	17K03_COLLAB-IT_CTRL_011.2021.2021.0	4	7.22	69.8	6350000	99	2	0	0	0	M66m	55	(R)	DRNSGGTEPDFmALDKK	(K)	m:Oxidized methionine	12.47	475.58	1880.88	18.4175	1275.5	Q9VLW2	Kinesin-like protein CG14535
2014	17K03_COLLAB-IT_CTRL_033.2898.2898.0	5	7.22	82.4	6780000	99	1	1	1	0	K137k	115	(K)	DNSNLYMVLEYVPGGEMFSHLRk	(V)	k:Ubiquitination-GG	17.8	562.98	2699.3	111.575	-877.9	P12370	cAMP-dependent protein kinase catalytic subunit
2021	17K03_COLLAB-IT_CTRL_011.1274.1333.0	3	7.21	79.6	25400000	99	2	0	0	0	M755m	750	(R)	TKETTmAGEK	(I)	m:Oxidized methionine	7.82	371.14	1095.54	15.8704	-112	A1Z7Z9	Centrosomal protein of 131 kDa
2022	17K03_COLLAB-IT_CTRL_022.3712.3712.0	5	7.21	65	25300000	99	1	0	0	0	M603m M604m	572	(K)	FHSVFRALAETEEAQICILHNIFELWSSHQQmmVVLIDK	(L)	C:Carbamidomethylation,m:Oxidized methionine	22.83	941.15	4670.34	31.3852	-128.6	Q7K4N3	Nuclear cap-binding protein subunit 1
2023	17K03_COLLAB-IT_CTRL_023.3841.3841.0	3	7.21	66.6	4370000	99	1	0	0	0	M32m	17	(K)	GIINDLQIAGNTSDDmGWK	(S)	m:Oxidized methionine	23.74	688.86	2047.97	16.5901	288.3	P23128	Putative ATP-dependent RNA helicase me31b
2026	17K03_COLLAB-IT_CTRL_031.3345.3345.0	4	7.21	87.3	11800000	99	1	1	1	0	M2715m K2717k	2714	(K)	DmAkQGSGSQSGAGAVAAVAAPTSAAPTAIGVDLSQSGLR	(S)	m:Oxidized methionine,kUbiquitination-GG	20.77	947.6	3655.83	131.544	397.6	Q8MSS1	Protein lava lamp
2028	17K03_COLLAB-IT_CTRL_031.1776.1776.0	4	7.21	61.9	8020000	99	1	1	1	0	K22k	4	(K)	YIAQIIVLGAQAVGRAFTk	(A)	k:Ubiquitination-GG	10.9	533.56	2019.17	112.043	-938.3	Q9VF08	Mitochondrial import inner membrane translocase subunit Tim16
2034	17K03_COLLAB-IT_CTRL_021.4950.4950.0	5	7.2	70.5	6430000	99	0	0	0	0	M270m	269	(R)	NmNTLYPDATPEELRQSDNICIICR	(E)	C:Carbamidomethylation,m:Oxidized methionine	30.53	608.43	3023.4	14.7189	-420	Q95SP2	E3 ubiquitin-protein ligase HRD1
2035	17K03_COLLAB-IT_CTRL_021.3275.3275.0	4	7.2	63.9	18100000	99	1	1	1	0	M127m K137k	116	(R)	QEELDAELDELmSEDFLQQYQkQR	(M)	m:Oxidized methionine,kUbiquitination-GG	19.97	779.38	2985.38	129.12	-294.7	Q9VUR7	Phosducin-like protein
2037	17K03_COLLAB-IT_CTRL_011.3207.3212.3	3	7.19	68.3	16000000	99	1	0	0	0	M92m	88	(K)	LQISmLVQFNEEIFEKSETR	(V)	m:Oxidized methionine	20.02	819.56	2441.24	15.4274	-231	Q9VVR4	Gram-negative bacteria-binding protein 2
2039	17K03_COLLAB-IT_CTRL_022.1991.1991.0	5	7.19	94.8	7210000	99	2	2	2	0	K1601k K1621k	1600	(R)	EkSNSCHSSNSYGLGGVPARNk	(K)	C:Carbamidomethylation,k:Ubiquitination-GG	12.21	516.24	2349.1	228.071	-5.8	Q9VW47	Mediator of RNA polymerase II transcription subunit 12
2042	17K03_COLLAB-IT_CTRL_021.3658.3658.0	4	7.19	92.7	8980000	99	1	0	0	0	M1008m M1011m M1016m	1005	(R)	TEImADmQHALmPAPPVPQNAPLTSASLK	(L)	m:Oxidized methionine	22.38	777.92	3059.54	49.1219	365.8	Q9VCX1	Regulator of G-protein signaling loco
2046	17K03_COLLAB-IT_CTRL_033.2161.2161.0	4	7.19	72.7	3950000	99	0	0	0	0	M6m M10m M14m M17m	3	(R)	SLPmFWRmAEEmARmPR	(L)	m:Oxidized methionine	13.16	551.7	2139.01	64.7663	357	P02515	Heat shock protein 22
2050	17K03_COLLAB-IT_CTRL_022.4973.4973.0	4	7.18	79.8	5710000	99	2	2	2	0	K550k K551k	531	(R)	RTLAYEVACLDITPLDETQkk	(S)	C:Carbamidomethylation,k:Ubiquitination-GG	30.76	674.41	2464.28	230.343	837.6	Q9XYZ5	DNA damage-binding protein 1
2062	17K03_COLLAB-IT_CTRL_022.2384.2384.0	5	7.17	72.7	12800000	99	2	0	0	0	M390m	382	(K)	YRPGYNADmGDEGLLTKTK	(I)	m:Oxidized methionine	14.67	429.43	2129.03	14.0877	-889.9	P91929	NADH dehydrogenase [ubiquinone] 1 alpha subcomplex subunit 10, mitochondrial
2064	17K03_COLLAB-IT_CTRL_033.3338.3338.0	5	7.17	68.8	5110000	99	2	0	0	0	M420m	414	(K)	ERDRLSmLAGYDVSPFAHTANHTSKPK	(T)	m:Oxidized methionine	20.66	610.07	3028.51	17.8151	597.5	Q9VIE6	Protein MCM10 homolog
2065	17K03_COLLAB-IT_CTRL_011.3676.3676.0	4	7.16	84.5	6300000	99	2	2	2	0	K145k K146k M169m	142	(K)	ATLkkAANSTAISTQTSPSVTPISLINmR	(W)	k:Ubiquitination-GG,mOxidized methionine	23.08	812.68	3001.64	246.063	610.4	P25028	Mitosis initiation protein fs(1)Ya
2066	17K03_COLLAB-IT_CTRL_012.4179.4179.0	4	7.16	77.4	2910000	99	0	0	0	0	M626m M628m	620	(K)	FVSDALmLmNDVGDVQTALTVLIALGEAR	(K)	m:Oxidized methionine	26.18	774.29	3062.59	31.5481	-142.8	Q9XZ25	GATOR complex protein WDR24
2067	17K03_COLLAB-IT_CTRL_011.1949.1949.0	3	7.16	76.1	4200000	99	1	1	1	0	K138k	138	(K)	kGDVGPGAGEVEFR	(G)	k:Ubiquitination-GG	12.02	511.57	1417.71	114.988	616.9	Q9VWG3	40S ribosomal protein S10b
2070	17K03_COLLAB-IT_CTRL_022.3841.3841.0	4	7.16	71.9	9640000	99	1	0	0	0	M577m M578m	575	(K)	CRmmDLNGDGKVDLNEFLEAFR	(L)	C:Carbamidomethylation,m:Oxidized methionine	23.64	666.78	2630.22	33.8822	710.3	P40421	Serine/threonine-protein phosphatase rdgC
2075	17K03_COLLAB-IT_CTRL_031.2367.2367.0	4	7.16	77	14100000	99	1	1	1	0	K957k	935	(K)	HEALVSDLEAFGNTIQALQEQAkNCR	(Q)	C:Carbamidomethylation,k:Ubiquitination-GG	14.63	765.5	2942.44	116.536	814.9	P13395	Spectrin alpha chain
2083	17K03_COLLAB-IT_CTRL_032.3533.3533.0	5	7.15	65.2	8770000	99	2	2	2	0	K143k K163k	125	(R)	YALVSAIAASGVPALVQSkGHVIDGVSEFPLVVSDEVQk	(V)	k:Ubiquitination-GG	21.94	842.14	3980.14	226.533	-369.1	P09180	60S ribosomal protein L4
2086	17K03_COLLAB-IT_CTRL_021.3826.3826.0	5	7.14	64.1	11300000	99	1	1	1	0	K222k M228m	206	(R)	ADVWALGITTIELADGkPPFADmHPTR	(A)	k:Ubiquitination-GG,mOxidized methionine	23.44	611.64	2922.48	131.689	540.6	P10676	Neither inactivation nor afterpotential protein C
2088	17K03_COLLAB-IT_CTRL_023.3348.3348.0	3	7.14	85.8	12900000	99	2	0	0	0	M601m	575	(K)	VKAHALPGVAIRVGINSGPVVAGVVGmK	(V)	m:Oxidized methionine	20.63	904.44	2696.58	14.7298	-466.6	Q9VEU5	Soluble guanylate cyclase 89Db
2095	17K03_COLLAB-IT_CTRL_021.4051.4051.0	3	7.13	84.7	5600000	99	1	1	1	0	M331m M335m K336k	317	(R)	LRESQNSLNNARSAmATVmk	(I)	m:Oxidized methionine,kUbiquitination-GG	24.87	790.1	2221.12	147.168	479.3	Q9U6L4	Protein tweety
2096	17K03_COLLAB-IT_CTRL_023.2423.2455.0	3	7.13	71.8	26100000	99	1	1	1	0	K8k	1	(-)	MAAANMEk	(G)	k:Ubiquitination-GG	14.91	326.68	865.391	112.635	-1439.8	Q9VTN3	Mitochondrial import inner membrane translocase subunit Tim13
2099	17K03_COLLAB-IT_CTRL_012.3849.3849.0	4	7.12	88.5	3570000	99	0	0	0	0	M211m M228m M231m	210	(R)	EmVQDLEVLPERNGIPREmGLmQILAAWR	(K)	m:Oxidized methionine	24.1	861.96	3394.74	50.0749	606.8	Q9W2B2	Putative gustatory receptor 58c
2100	17K03_COLLAB-IT_CTRL_011.3981.3981.0	4	7.12	72.4	4190000	99	2	2	2	0	K489k K491k	445	(K)	MDDGAGVVLPLHVGVMQQPVASSSSGSSGSHGGNGNGGSGSGLLkPk	(R)	k:Ubiquitination-GG	25	1151.19	4374.12	227.618	-101.7	Q7YU81	Protein charlatan
2106	17K03_COLLAB-IT_CTRL_031.1852.1852.0	5	7.12	83.4	2910000	99	1	1	1	0	K1577k	1541	(K)	QIVDNSLIYNGPQSAYTLAAQRMFSSCFELLAEREDk	(L)	C:Carbamidomethylation,k:Ubiquitination-GG	11.39	877.12	4265.06	116.507	562.3	P51123	Transcription initiation factor TFIID subunit 1
2109	17K03_COLLAB-IT_CTRL_011.3236.3236.0	3	7.11	83.1	7860000	99	2	0	0	0	M515m	508	(K)	INSQIASmPIELKSHHNSSPK	(E)	m:Oxidized methionine	20.25	778.52	2318.19	15.3533	-274.9	O61643	Inhibin beta chain
2113	17K03_COLLAB-IT_CTRL_021.3648.3648.0	4	7.11	61.3	22200000	99	2	0	0	0	M494m	467	(R)	GEVLALLNLYPFEQYVHWEKCTHEFKQmFCR	(D)	C:Carbamidomethylation,m:Oxidized methionine	22.32	997.41	3972.9	13.7159	-571.7	Q9VKG9	Protein spaetzle 4
2116	17K03_COLLAB-IT_CTRL_012.4065.4065.0	5	7.1	78.6	5790000	99	2	2	2	0	K202k M207m K223k	192	(K)	DDNFENDAILkTYQSmLRLTIINIFVPFVQNk	(I)	k:Ubiquitination-GG,mOxidized methionine	25.46	809.62	3799.97	244.098	4.3	Q9VGB4	Probable cytochrome P450 313a2
2118	17K03_COLLAB-IT_CTRL_012.2685.2685.0	4	7.1	70	4120000	99	1	0	0	0	M52m M67m	42	(R)	KQVEVDGQQCmLEILDTAGTEQFTAmR	(D)	C:Carbamidomethylation,m:Oxidized methionine	16.6	783.32	3098.46	31.799	-61	P08645	Ras-like protein 3
2120	17K03_COLLAB-IT_CTRL_021.2841.2841.0	5	7.1	62	7940000	99	1	1	1	0	K265k	239	(R)	LDGSDSQNDFWRLVDSTEIHAIGHCEkNGGMLQPPLGFR	(M)	C:Carbamidomethylation,k:Ubiquitination-GG	17.29	902.71	4397.08	112.438	-355.8	Q9VHA0	Polycomb protein Scm
2121	17K03_COLLAB-IT_CTRL_022.5851.5851.0	3	7.1	66.4	12200000	99	1	0	0	0	M846m	843	(K)	LELmQCVLDTLKPHSEWNR	(L)	C:Carbamidomethylation,m:Oxidized methionine	36.29	796.55	2369.17	18.4614	1033	O17468	Protein HIRA homolog
2134	17K03_COLLAB-IT_CTRL_021.2533.2533.0	5	7.08	68.9	11100000	99	1	0	0	0	M354m	337	(K)	LQDEQIFVETRLPQLQEmSDFLRK	(N)	m:Oxidized methionine	15.6	596.83	2963.53	16.5914	200.1	P18459	Tyrosine 3-monooxygenase
2136	17K03_COLLAB-IT_CTRL_033.2874.2883.0	5	7.08	64.1	16800000	99	2	2	2	0	K93k K108k	89	(R)	QLLEkECPQLSMYITLESIkQTQYAALSR	(G)	C:Carbamidomethylation,k:Ubiquitination-GG	17.65	734.37	3441.78	226.045	-556.4	P39205	Molybdenum cofactor synthesis protein cinnamon
2140	17K03_COLLAB-IT_CTRL_021.1971.1971.0	4	7.07	70.1	7950000	99	0	0	0	0	M448m	435	(K)	DGLQNNPNALNIHmIADLYAEVIGVLAQSR	(F)	m:Oxidized methionine	12.2	817.54	3249.67	17.4697	451.4	Q9VT28	Protein furry
2156	17K03_COLLAB-IT_CTRL_012.2636.2636.0	5	7.05	88.6	5150000	99	0	0	0	0	M818m M834m	816	(R)	SSmSVGNLYSQGGNGASGmRFAGVEAGGAR	(A)	m:Oxidized methionine	16.29	582.32	2875.32	32.2499	89.4	Q9VZZ9	Protein daughter of sevenless
2170	17K03_COLLAB-IT_CTRL_031.2698.2698.0	4	7.04	60.7	7960000	99	2	0	0	0	M1434m M1452m	1433	(K)	ImSAVIKHNQDGRTLSEPFmK	(L)	m:Oxidized methionine	16.66	609.73	2402.23	33.6663	688.2	P25439	ATP-dependent helicase brm
2174	17K03_COLLAB-IT_CTRL_021.3037.3037.0	5	7.03	71.6	43800000	99	0	0	0	0	M428m	399	(R)	NLLFNRFDNGGAEGGSSEGGASGVDRLGImAYDPESGEVR	(E)	m:Oxidized methionine	18.48	824.59	4100.9	18.0206	491.8	Q9VPN2	Protein amnionless
2176	17K03_COLLAB-IT_CTRL_021.1910.1910.0	5	7.03	87.2	10300000	99	1	0	0	0	M1166m	1162	(R)	SSSDmCDGPRESEVVILKER	(K)	C:Carbamidomethylation,m:Oxidized methionine	11.81	462.51	2294.07	14.4458	-671.1	Q9VB11	Protein unc-80 homolog
2178	17K03_COLLAB-IT_CTRL_032.2915.2915.0	5	7.03	73	7430000	99	1	0	0	0	M847m M862m M878m	847	(K)	mKGDLDLAIGNNESAmRCYVNALVTGTDYCTmPLQR	(N)	C:Carbamidomethylation,m:Oxidized methionine	17.95	825.72	4077.9	46.675	-317.6	A1ZAK1	Integrator complex subunit 8
2184	17K03_COLLAB-IT_CTRL_031.3314.3314.0	5	7.02	63.1	43500000	99	1	1	1	0	K488k	471	(R)	GDEIAFFVAPNGEVSISkNNGPAVVVMHVDQSLQLWAFLDVYGSTQSLR	(M)	k:Ubiquitination-GG	20.58	1084.78	5305.66	114.208	30.5	P29503	Protein neuralized
2186	17K03_COLLAB-IT_CTRL_013.2867.2867.0	5	7.01	83.9	12700000	99	1	1	1	0	M200m K211k	187	(R)	AAPRQLAWHPWGNmLAVALGCNRIk	(I)	C:Carbamidomethylation,m:Oxidized methionine,kUbiquitination-GG	17.86	593.05	2830.49	130.734	235.1	Q9VU65	POC1 centriolar protein homolog
2190	17K03_COLLAB-IT_CTRL_012.3731.3731.0	3	7.01	72.5	8400000	99	1	1	1	0	M129m M133m K148k	127	(K)	QDmDGCmTVAEVHHALGLENLkNR	(T)	C:Carbamidomethylation,m:Oxidized methionine,kUbiquitination-GG	23.36	962.85	2738.28	148.255	769.8	P25160	ADP-ribosylation factor-like protein 1
2193	17K03_COLLAB-IT_CTRL_022.5807.5807.0	3	7.01	88.1	6530000	99	1	0	0	0	M466m	462	(K)	LINFmAPNESSDWTDASK	(S)	m:Oxidized methionine	36.01	680.55	2025.92	13.7132	-1118.7	Q9VM95	Protein Aatf
2202	17K03_COLLAB-IT_CTRL_033.1655.1655.0	5	7.01	83.5	1790000	99	2	0	0	0	M550m M558m	546	(R)	SSLSmETPPASPmKYNAGADQTPQALK	(E)	m:Oxidized methionine	9.99	571.18	2820.35	31.5166	-165.9	Q9VFG8	Protein kibra
5	17K03_COLLAB-IT_CTRL_013.2716.2723.3	3	21.44	98.2	74700000	18.363	2	1	1	0	K11k	7	(K)	TLTGkTITLEVEPSDTIENVK	(A)	k:Ubiquitination-GG	16.89	801.64	2288.22	114.682	266.1	P18101	Ubiquitin-60S ribosomal protein L40
11	17K03_COLLAB-IT_CTRL_033.2742.2746.3	3	20.85	95.6	112000000	17.853	2	1	1	0	K11k	7	(K)	TLTGkTITLEVEPSDTIENVK	(A)	k:Ubiquitination-GG	16.87	801.71	2288.22	114.892	353.4	P18101	Ubiquitin-60S ribosomal protein L40
10	17K03_COLLAB-IT_CTRL_021.2730.2761.0	3	20.88	96.4	224000000	17.73	2	1	1	0	K11k	7	(K)	TLTGkTITLEVEPSDTIENVK	(A)	k:Ubiquitination-GG	16.69	801.35	2288.22	113.812	-96	P18101	Ubiquitin-60S ribosomal protein L40
28	17K03_COLLAB-IT_CTRL_012.3650.3650.0	3	19.66	94.1	21300000	16.24	2	1	1	0	K196k	194	(R)	LAkAAFDDAIAELDTLSEESYK	(D)	k:Ubiquitination-GG	22.85	838.76	2400.18	114.084	16.2	P92177	14-3-3 protein epsilon
57	17K03_COLLAB-IT_CTRL_013.2468.2468.0	3	18.64	95.8	18100000	15.63	2	1	1	0	K101k	98	(R)	LYDkQGNGFIPTTCLK	(E)	C:Carbamidomethylation,k:Ubiquitination-GG	15.32	657.03	1854.94	114.134	46	P47949	Troponin C, isoform 3
253	17K03_COLLAB-IT_CTRL_021.2167.2167.2	2	14.35	70.2	10900000	14.347	2	1	1	0	M314m K316k	314	(R)	mQkEITALAPSTIK	(I)	m:Oxidized methionine,kUbiquitination-GG	13.46	830.88	1530.86	129.897	-85	P02574	Actin, larval muscle
123	17K03_COLLAB-IT_CTRL_023.3147.3147.0	3	17.08	89.8	9940000	14.02	2	1	1	0	K81k	74	(R)	GFTLEELkGAGIGANFAK	(T)	k:Ubiquitination-GG	19.32	646.66	1822.97	114.996	491.6	P41126	60S ribosomal protein L13
132	17K03_COLLAB-IT_CTRL_013.2286.2293.0	2	16.88	92.4	63800000	13.803	2	1	1	0	K316k	314	(R)	MQkEITALAPSTIK	(I)	k:Ubiquitination-GG	14.24	822.91	1530.86	113.957	-52.4	P02574	Actin, larval muscle
26	17K03_COLLAB-IT_CTRL_032.3626.3631.0	3	19.68	93.4	32300000	13.762	2	1	1	0	K196k	194	(R)	LAkAAFDDAIAELDTLSEESYK	(D)	k:Ubiquitination-GG	22.53	839.19	2400.18	115.374	529	P92177	14-3-3 protein epsilon
190	17K03_COLLAB-IT_CTRL_033.2494.2494.0	3	15.53	92.2	15800000	12.486	2	1	1	0	K101k	98	(R)	LYDkQGNGFIPTTCLK	(E)	C:Carbamidomethylation,k:Ubiquitination-GG	15.31	657.35	1854.94	115.094	533.3	P47949	Troponin C, isoform 3
175	17K03_COLLAB-IT_CTRL_023.2324.2333.0	2	15.81	91.3	37200000	11.974	2	1	1	0	K316k	314	(R)	MQkEITALAPSTIK	(I)	k:Ubiquitination-GG	14.32	822.96	1530.86	114.057	8.4	P02574	Actin, larval muscle
200	17K03_COLLAB-IT_CTRL_011.2187.2199.3	3	15.33	92.1	13600000	11.511	2	1	1	0	M314m K316k	314	(R)	mQkEITALAPSTIK	(I)	m:Oxidized methionine,kUbiquitination-GG	13.55	554.26	1530.86	129.91	-77.3	P02574	Actin, larval muscle
449	17K03_COLLAB-IT_CTRL_032.1506.1533.2	2	11.15	68.5	5920000	11.152	2	1	1	0	K1502k	1500	(R)	ENkNLADEVK	(D)	k:Ubiquitination-GG	9.14	637.3	1159.6	113.997	-35.8	P05661	Myosin heavy chain, muscle
276	17K03_COLLAB-IT_CTRL_031.2575.2575.0	4	13.92	73.9	10500000	10.909	2	1	1	0	K579k	574	(K)	CNETIkWLDANQLADKEEYEHR	(Q)	C:Carbamidomethylation,k:Ubiquitination-GG	15.89	720.06	2762.28	114.934	309.8	P11147	Heat shock 70 kDa protein cognate 4
259	17K03_COLLAB-IT_CTRL_021.3697.3697.0	3	14.21	75.9	51800000	9.722	2	1	1	0	K196k	194	(R)	LAkAAFDDAIAELDTLSEESYK	(D)	k:Ubiquitination-GG	22.63	838.79	2400.18	114.174	52	P92177	14-3-3 protein epsilon
351	17K03_COLLAB-IT_CTRL_012.3888.3888.0	3	12.72	79.3	7500000	9.717	2	1	1	0	K196k	191	(K)	ACQLAkQAFDDAIAELDTLNEDSYK	(D)	C:Carbamidomethylation,k:Ubiquitination-GG	24.35	982.06	2829.32	114.841	271	P29310	14-3-3 protein zeta
142	17K03_COLLAB-IT_CTRL_023.2232.2232.2	2	16.62	91.6	12600000	9.649	2	1	1	0	K1790k	1783	(R)	KALEQQIkELQVR	(L)	k:Ubiquitination-GG	13.7	849.44	1582.93	114.945	531.4	P05661	Myosin heavy chain, muscle
346	17K03_COLLAB-IT_CTRL_021.1487.1513.0	3	12.82	85.5	6530000	9.589	2	1	1	0	K1502k	1500	(R)	ENkNLADEVK	(D)	k:Ubiquitination-GG	9.14	425.22	1159.6	114.05	5.6	P05661	Myosin heavy chain, muscle
718	17K03_COLLAB-IT_CTRL_013.3439.3439.0	5	9.57	71.5	9050000	9.565	1	0	0	0	M166m	146	(R)	AALPQHVVTMLNNMPTTLHPmSQFAAAVTALNHDSK	(F)	m:Oxidized methionine	21.51	775.4	3856.93	16.0414	12	Q9W401	Probable citrate synthase, mitochondrial
381	17K03_COLLAB-IT_CTRL_032.2322.2322.0	3	12.14	84.3	17600000	9.138	2	1	1	0	K316k	314	(R)	MQkEITALAPSTIK	(I)	k:Ubiquitination-GG	14.32	549.24	1530.86	114.85	490.1	P02574	Actin, larval muscle
269	17K03_COLLAB-IT_CTRL_033.3083.3083.0	3	14	82.5	7220000	9.092	2	1	1	0	K54k	48	(K)	ENLDDLkQELDIDFHK	(I)	k:Ubiquitination-GG	18.96	696.37	1971.97	115.13	520.7	P13607	Sodium/potassium-transporting ATPase subunit alpha
397	17K03_COLLAB-IT_CTRL_012.2654.2654.0	3	11.92	72	6370000	8.882	2	1	1	0	K185k	184	(R)	IkPLAIEGFGEAK	(L)	k:Ubiquitination-GG	16.4	496.35	1372.78	114.252	140.6	P19351	Troponin T, skeletal muscle
413	17K03_COLLAB-IT_CTRL_032.3491.3491.0	4	11.67	85.1	49200000	8.667	2	1	1	0	M377m K396k	372	(R)	DKITLmVDDEVYGELYDGLPFFNEk	(C)	m:Oxidized methionine,kUbiquitination-GG	21.67	770.96	2950.41	130.411	121.3	Q9VVR4	Gram-negative bacteria-binding protein 2
405	17K03_COLLAB-IT_CTRL_031.3157.3157.0	4	11.79	87.6	6780000	8.514	3	2	2	0	K123k K124k	123	(K)	kkHNEIITDFQEQVEILTK	(N)	k:Ubiquitination-GG	19.57	636.41	2313.24	229.373	506.3	P35415	Paramyosin, long form
1202	17K03_COLLAB-IT_CTRL_032.4122.4122.0	4	8.47	72.3	12100000	8.467	2	1	1	0	M736m K737k	706	(K)	RKLSPSVQADFTNFVQAENIALQPGVNLIEmk	(A)	m:Oxidized methionine,kUbiquitination-GG	25.65	922.35	3557.88	128.5	-417.2	Q9VFB7	Trafficking protein particle complex subunit 10
433	17K03_COLLAB-IT_CTRL_031.3741.3765.0	5	11.47	74.5	35300000	8.465	3	2	2	0	M56m K75k M85m K88k	49	(R)	LSEILNImGKLSADAQGLCHAVTSADkLASDQVVYLmADk	(A)	C:Carbamidomethylation,m:Oxidized methionine,kUbiquitination-GG	23.26	908.48	4276.17	262.205	469.1	Q9W5X9	Alpha-tubulin N-acetyltransferase 2
436	17K03_COLLAB-IT_CTRL_013.2754.2770.0	4	11.41	62.9	37800000	8.368	3	1	1	0	K208k	207	(R)	SkIVGTPAAELLKWANATVTVCHSK	(T)	C:Carbamidomethylation,k:Ubiquitination-GG	17.14	699.69	2681.44	114.294	89.7	O96553	C-1-tetrahydrofolate synthase, cytoplasmic
1394	17K03_COLLAB-IT_CTRL_031.2681.2681.0	4	8.13	67.2	10300000	8.132	3	1	1	0	K273k	269	(R)	HTNGkHLVSHSSNMVLALQSKLASMSTDFK	(Q)	k:Ubiquitination-GG	16.56	846.48	3268.66	114.242	58.7	Q24509	Syntaxin-5
457	17K03_COLLAB-IT_CTRL_021.3026.3026.0	4	11.08	84.5	38300000	8.06	2	1	1	0	K2166k	2143	(R)	KPRGISAPADATAVHVVTPVAPNk	(Q)	k:Ubiquitination-GG	18.41	628.81	2396.34	115.877	730.2	Q9VW15	Histone-lysine N-methyltransferase ash1
474	17K03_COLLAB-IT_CTRL_013.2559.2565.0	5	10.92	64.6	21000000	7.908	1	0	0	0	M706m	689	(R)	NTMENLTCATVKGSSVDmYFR	(R)	C:Carbamidomethylation,m:Oxidized methionine	15.9	488.8	2424.1	15.8717	-50.5	Q24418	Glutamate [NMDA] receptor subunit 1
394	17K03_COLLAB-IT_CTRL_032.3437.3437.0	5	11.95	63.2	18700000	7.894	1	0	0	0	M166m	146	(R)	AALPQHVVTMLNNMPTTLHPmSQFAAAVTALNHDSK	(F)	m:Oxidized methionine	21.33	775.87	3856.93	18.3914	618.4	Q9W401	Probable citrate synthase, mitochondrial
493	17K03_COLLAB-IT_CTRL_022.2998.2998.0	4	10.79	62.7	29500000	7.756	2	0	0	0	M942m M954m	939	(R)	GEHmEARFCDWKGLQmSTMNVIWDAK	(Q)	C:Carbamidomethylation,m:Oxidized methionine	18.31	793.98	3140.42	32.4773	153.6	P24785	Dosage compensation regulator
1634	17K03_COLLAB-IT_CTRL_032.3181.3181.0	5	7.75	69.6	18500000	7.75	2	1	1	0	K175k	169	(K)	FLNVLEkNLDAELELNQVIPPFTLNNICETALGVK	(L)	C:Carbamidomethylation,k:Ubiquitination-GG	19.65	817.41	3969.1	113.917	-30.9	Q9VMS9	Probable cytochrome P450 4ac1
498	17K03_COLLAB-IT_CTRL_031.4288.4329.0	5	10.76	79.2	11200000	7.682	2	1	1	0	M1244m M1258m K1274k	1239	(R)	RKLTTmASGGGGVGGDPGVmEAIAANGTSVLGAELk	(T)	m:Oxidized methionine,kUbiquitination-GG	26.72	705.04	3372.72	148.446	685.3	Q9VMA7	Transport and Golgi organization protein 1
509	17K03_COLLAB-IT_CTRL_021.1764.1779.0	4	10.66	63.7	34600000	7.64	2	1	1	0	K142k M148m	132	(K)	LSTVSSAYSFkEPRGAmEEQK	(A)	k:Ubiquitination-GG,mOxidized methionine	10.88	619.3	2345.14	129.034	-405.7	Q9VU84	Drebrin-like protein
512	17K03_COLLAB-IT_CTRL_022.4650.4650.0	3	10.62	85	5100000	7.611	2	1	1	0	M161m K184k	160	(K)	EmHGQAPVVTYPSKQALTQFESLQk	(T)	m:Oxidized methionine,kUbiquitination-GG	28.73	983.49	2817.42	131.031	337	Q9VSH4	Cleavage and polyadenylation specificity factor subunit CG7185
448	17K03_COLLAB-IT_CTRL_011.3257.3261.0	5	11.2	63	5080000	7.609	2	1	1	0	M338m K355k	333	(K)	EECPPmRKYNPTTYVLETNPEGk	(Y)	C:Carbamidomethylation,m:Oxidized methionine,kUbiquitination-GG	20.39	577.8	2753.29	131.68	569.2	P04412	Epidermal growth factor receptor
513	17K03_COLLAB-IT_CTRL_013.1891.1891.0	4	10.59	61.2	19000000	7.585	2	1	1	0	K91k	79	(K)	LEMIKTYRGQVEk	(E)	k:Ubiquitination-GG	11.67	428.56	1594.86	116.356	1351.7	P92177	14-3-3 protein epsilon
1772	17K03_COLLAB-IT_CTRL_022.2576.2576.0	5	7.55	67.5	12900000	7.549	3	0	0	0	M162m	144	(K)	SEIVCQNTENLVAIKNGDmVHPHIAAMYKLLEK	(N)	C:Carbamidomethylation,m:Oxidized methionine	15.81	757.49	3765.91	17.5084	400	P91875	DNA-directed RNA polymerase I subunit RPA1
489	17K03_COLLAB-IT_CTRL_032.2571.2571.0	5	10.82	68.5	19800000	7.529	0	0	0	0	M419m	412	(R)	NQITNILmDISTMSHNTYNLR	(R)	m:Oxidized methionine	15.8	500.25	2479.21	18.0141	808.6	Q9VW51	RNA polymerase II elongation factor Ell
488	17K03_COLLAB-IT_CTRL_033.2910.2922.0	5	10.84	72.1	14500000	7.525	3	2	2	0	K365k K368k	334	(K)	QGTITTSLVNNKELLHSVQETFAQNLETINSkVAk	(V)	k:Ubiquitination-GG	17.87	818.05	3856.05	230.176	511.5	Q7K2D2	Dynactin subunit 2
345	17K03_COLLAB-IT_CTRL_021.3949.3949.0	3	12.82	80.4	12300000	7.382	2	1	1	0	K196k	191	(K)	ACQLAkQAFDDAIAELDTLNEDSYK	(D)	C:Carbamidomethylation,k:Ubiquitination-GG	24.23	982.08	2829.32	114.901	291.3	P29310	14-3-3 protein zeta
538	17K03_COLLAB-IT_CTRL_011.1998.1998.0	5	10.39	72.5	6910000	7.381	2	2	2	0	M153m K177k K186k	153	(R)	mDGGHSGGVTAADVLANVEEGDLVkILRMYGEEk	(A)	m:Oxidized methionine,kUbiquitination-GG	12.33	762.25	3560.74	246.485	631.5	Q9VGY5	Probable methyltransferase-like protein 15 homolog
545	17K03_COLLAB-IT_CTRL_022.2820.2820.0	5	10.37	68.9	29200000	7.37	3	2	2	0	M730m M741m K754k K759k	728	(K)	LImYGKDTAHCDAmGFVSELLEQHVTkVALGk	(A)	C:Carbamidomethylation,m:Oxidized methionine,kUbiquitination-GG	17.27	765.54	3561.79	261.881	472.1	Q9NB71	E3 ubiquitin-protein ligase highwire
547	17K03_COLLAB-IT_CTRL_033.3187.3187.0	5	10.37	79.7	50000000	7.349	1	0	0	0	M723m	714	(R)	YHAFDDIHLmEQSGGKFGNNSGMGMFNANAHGGSASSILDAHQAFR	(N)	m:Oxidized methionine	19.65	983.22	4895.19	16.8813	180.4	P42283	Longitudinals lacking protein, isoform G
550	17K03_COLLAB-IT_CTRL_023.3599.3599.0	4	10.35	83.1	36900000	7.343	1	1	1	0	M662m K685k	650	(K)	AGSNAEAMRSLAmATLCALAQGAESESVEVLPSLAk	(Y)	C:Carbamidomethylation,m:Oxidized methionine,kUbiquitination-GG	22.22	941.67	3633.79	129.866	-45.6	Q8INF7	Dynein assembly factor 5, axonemal
528	17K03_COLLAB-IT_CTRL_023.2156.2164.0	5	10.47	83.1	69400000	7.305	1	0	0	0	M269m	266	(K)	NGGmLQPPLGFRMNASSWPGYLCK	(I)	C:Carbamidomethylation,m:Oxidized methionine	13.22	540.47	2681.28	17.0424	388.2	Q9VHA0	Polycomb protein Scm
2025	17K03_COLLAB-IT_CTRL_033.2662.2662.0	5	7.21	60.5	14000000	7.213	2	0	0	0	M4871m	4870	(K)	AmSSTGSAGSVIGAGAGAVAAGGKCESSAASIVSSSGPMSPK	(D)	C:Carbamidomethylation,m:Oxidized methionine	16.37	743.73	3697.75	16.8743	236.7	Q9W596	Microtubule-associated protein futsch
1	17K03_COLLAB-IT_CTRL_031.4014.4014.0	3	23.34	98	11400000	7.208	2	1	1	0	K335k	324	(R)	LALLDAMVEMAkNPDIEWNEK	(D)	k:Ubiquitination-GG	25	849.15	2430.2	115.231	466.8	Q9V3S0	Cytochrome P450 4g1
2063	17K03_COLLAB-IT_CTRL_032.2980.2980.0	5	7.17	61.5	12900000	7.171	3	1	1	0	K184k M201m M203m M207m	183	(K)	AkATDENIALAFQDLSVLmAmAKDmVGVSK	(T)	k:Ubiquitination-GG,mOxidized methionine	18.35	666.42	3167.61	160.456	-472.3	Q9VU87	Vacuolar protein-sorting-associated protein 36
501	17K03_COLLAB-IT_CTRL_023.3246.3246.0	4	10.75	73.3	8870000	7.159	2	1	1	0	K390k	386	(K)	VQDCkNGIYAMAAKDVFVTLNMPR	(Y)	C:Carbamidomethylation,k:Ubiquitination-GG	19.93	714.67	2741.36	114.301	90.4	Q960Z0	Kinesin-like protein Klp10A
587	17K03_COLLAB-IT_CTRL_032.2093.2093.0	5	10.15	80.3	7580000	7.143	2	2	2	0	M970m K972k K985k	969	(K)	EmEkQFIQAAFSPNSVkGASGGMGSSAPSTPTR	(Q)	m:Oxidized methionine,kUbiquitination-GG	12.83	720.42	3355.61	242.466	-448.7	P25992	yemanuclein
597	17K03_COLLAB-IT_CTRL_033.3684.3684.0	5	10.08	78.9	14200000	7.067	2	2	2	0	M141m K150k K156k	132	(R)	ALCSITDNTmLQAVERYMkQCIVDk	(N)	C:Carbamidomethylation,m:Oxidized methionine,kUbiquitination-GG	22.85	646.65	2987.45	241.775	-714	Q8I0G5	Coatomer subunit gamma
2162	17K03_COLLAB-IT_CTRL_031.3198.3198.0	5	7.05	67	36500000	7.048	1	1	1	0	M267m K284k	248	(R)	IGEPYSPEMPIFWFRFLPAmCGSLLAPAVYNLLLEAkLSR	(W)	C:Carbamidomethylation,m:Oxidized methionine,kUbiquitination-GG	19.83	946.29	4597.39	130.036	-0.4	Q9VTK2	Protein O-mannosyltransferase 1
558	17K03_COLLAB-IT_CTRL_012.2441.2441.0	4	10.28	78.3	14200000	7.02	2	1	1	0	K152k	152	(R)	kLPTQDTANVNPFTPDSLMAHNK	(K)	k:Ubiquitination-GG	15.07	663.95	2539.26	113.517	-198.2	P54350	Wee1-like protein kinase
2194	17K03_COLLAB-IT_CTRL_021.3448.3448.0	5	7.01	61.5	25500000	7.009	2	1	1	0	K13k	1	(-)	MPRPLKMSYGDQkPPYSYISLTAMAIIHSPQRLLPLSEIYR	(F)	k:Ubiquitination-GG	21.08	976.28	4761.51	115.863	373.1	P32029	Fork head domain-containing protein FD5
610	17K03_COLLAB-IT_CTRL_021.2679.2679.0	3	10.01	74.5	92000000	7.005	3	1	1	0	K128k	118	(R)	NDMVIVILHAkVAQKSYGNEK	(R)	k:Ubiquitination-GG	16.41	825.17	2357.26	116.231	884.6	P28159	Suppressor of hairless protein
608	17K03_COLLAB-IT_CTRL_022.2914.2935.0	5	10.02	78.9	87400000	6.967	1	1	1	0	K237k M241m	234	(R)	QDPkLSEmEHYEQMVACIQDHR	(T)	C:Carbamidomethylation,k:Ubiquitination-GG,mOxidized methionine	17.81	575.86	2744.22	131.048	351.5	Q9W1P7	Putative odorant receptor 59c
582	17K03_COLLAB-IT_CTRL_032.3021.3021.0	4	10.17	60.3	20100000	6.95	3	2	2	0	K183k M194m K197k	173	(R)	FFDNDMSKVPkQALTVGVGTVmDSk	(E)	k:Ubiquitination-GG,mOxidized methionine	18.6	740.21	2714.35	243.465	-208.1	Q9VMP9	Glucosamine-6-phosphate isomerase
445	17K03_COLLAB-IT_CTRL_013.2561.2561.0	4	11.24	76.6	7830000	6.93	2	1	1	0	K579k	574	(K)	CNETIkWLDANQLADKEEYEHR	(Q)	C:Carbamidomethylation,k:Ubiquitination-GG	15.91	720.34	2762.28	116.054	698.8	P11147	Heat shock 70 kDa protein cognate 4
568	17K03_COLLAB-IT_CTRL_032.3024.3024.0	5	10.22	71.7	12700000	6.93	2	1	1	0	K161k	135	(K)	HIKETDPPETVQSWIEYLSGETWNPLk	(L)	k:Ubiquitination-GG	18.62	662.82	3197.58	112.492	-468.6	Q9VQ93	Golgi phosphoprotein 3 homolog sauron
611	17K03_COLLAB-IT_CTRL_011.2095.2095.0	5	10	62.4	15400000	6.902	1	0	0	0	M946m	919	(R)	SQIEHTTSPGVTFVVMLPLLKFGHVSYmEQHTR	(V)	m:Oxidized methionine	12.94	758	3769.92	16.0516	15	A1ZBE8	Protein dopey-1 homolog
481	17K03_COLLAB-IT_CTRL_021.1569.1575.0	4	10.86	65.6	22000000	6.895	2	1	1	0	M1m K10k	1	(-)	mAAAPKDIEkPHVGDSASVHR	(I)	m:Oxidized methionine,kUbiquitination-GG	9.65	587.53	2216.12	130.974	398.9	P55828	40S ribosomal protein S20
590	17K03_COLLAB-IT_CTRL_032.2359.2378.0	4	10.14	64.3	47400000	6.858	2	1	1	0	M287m K288k	259	(K)	IMLGQSDDVNQLVSGKLAITYSGRDIDAmk	(S)	m:Oxidized methionine,kUbiquitination-GG	14.52	842.39	3238.64	127.894	-636.9	Q7KLV9	26S proteasome non-ATPase regulatory subunit 11
599	17K03_COLLAB-IT_CTRL_012.3058.3058.0	2	10.07	79.2	5400000	6.845	0	0	0	0	M784m	783	(K)	ImSWMQAWAR	(G)	m:Oxidized methionine	18.96	648.36	1279.61	16.1053	85.2	P05661	Myosin heavy chain, muscle
648	17K03_COLLAB-IT_CTRL_012.2711.2711.0	4	9.84	74.7	8940000	6.836	2	1	1	0	K44k	25	(K)	SKEQQQQSQPLEIPEQRASk	(C)	k:Ubiquitination-GG	16.76	614.68	2339.2	116.503	1001.9	Q967D7	Protein turtle
650	17K03_COLLAB-IT_CTRL_013.2114.2114.0	5	9.83	67.1	70300000	6.825	3	1	1	0	K90k	64	(K)	NKTKPGACSSSSNSSSSSGSAEISAAk	(S)	C:Carbamidomethylation,k:Ubiquitination-GG	13.07	541.04	2587.19	113.981	-23	Q24423	Zinc finger protein Noc
653	17K03_COLLAB-IT_CTRL_032.2782.2787.0	3	9.83	60.5	369000000	6.81	2	1	1	0	K1133k	1117	(K)	DGKWTTVLVDDLLPCDkR	(G)	C:Carbamidomethylation,k:Ubiquitination-GG	17.13	749.04	2131.09	114.02	-10.1	P27398	Calpain-D
667	17K03_COLLAB-IT_CTRL_012.3218.3226.0	5	9.77	70.5	12500000	6.772	0	0	0	0	M646m	613	(K)	SEVHQQVAAGLPHLMQSAGGAAAAAAAAVAAQRmVCFSNAR	(I)	C:Carbamidomethylation,m:Oxidized methionine	20.01	819.28	4076.01	16.3585	88.9	Q9W539	Hormone receptor 4
657	17K03_COLLAB-IT_CTRL_032.1784.1801.0	3	9.82	69.7	16100000	6.768	2	1	1	0	K1049k M1061m	1046	(K)	VSSkLTIDDLKGLFGm	(-)	k:Ubiquitination-GG,mOxidized methionine	10.87	619.3	1723.93	131.956	1033.3	P34739	Transcription termination factor 2
668	17K03_COLLAB-IT_CTRL_021.2338.2338.0	4	9.77	82.9	42700000	6.747	1	0	0	0	M1402m M1407m	1394	(K)	QRMNTEIPmLNKQmQILDEAR	(K)	m:Oxidized methionine	14.45	648.39	2559.28	31.2542	-284	A1Z8P9	Nucleoprotein TPR
677	17K03_COLLAB-IT_CTRL_022.2196.2196.0	4	9.74	74.4	3230000	6.744	2	1	1	0	K923k	923	(R)	kCNNQTIGNILLK	(I)	C:Carbamidomethylation,k:Ubiquitination-GG	13.5	408.33	1515.83	114.467	260.1	Q9VUQ5	Protein argonaute-2
621	17K03_COLLAB-IT_CTRL_012.3014.3021.0	5	9.96	60.4	7180000	6.743	0	0	0	0	M57m	41	(R)	GSSSGVLSSSSSSSNNmNNGYYSGSSSTAGSSSGYVFTSSSAVNSGSTGYSGPMDSTGFCTR	(R)	C:Carbamidomethylation,m:Oxidized methionine	18.68	1212.47	6042.5	15.8206	-28.8	Q01819	Connectin
681	17K03_COLLAB-IT_CTRL_013.3262.3262.0	4	9.73	79.9	11500000	6.725	3	1	1	0	K384k M386m	381	(K)	FVLkEmESLYVEELKSSINLLMANLESLPVSK	(G)	k:Ubiquitination-GG,mOxidized methionine	20.4	947.05	3653.94	131.236	316.6	Q9NHE5	Calcium-dependent secretion activator
692	17K03_COLLAB-IT_CTRL_021.1976.1976.0	5	9.68	77.4	11000000	6.675	2	1	1	0	K127k	93	(R)	MVNDVITVVTKANGNVSDSVGIPSEGGVIAAIDPkAR	(V)	k:Ubiquitination-GG	12.23	762.01	3693.95	112.073	-517.6	Q9XYZ5	DNA damage-binding protein 1
647	17K03_COLLAB-IT_CTRL_022.2376.2383.0	5	9.85	71.2	64300000	6.66	2	1	1	0	K375k	374	(K)	LkEMENTPLPFGSDLASSIITNHDDLPEPNSLDLLQK	(R)	k:Ubiquitination-GG	14.62	842.36	4092.05	115.723	399.2	P39770	Homeotic protein spalt-major
703	17K03_COLLAB-IT_CTRL_033.3264.3264.0	4	9.63	68	5350000	6.631	0	0	0	0	M1399m	1384	(R)	TLEISHQSIINAAVNmSTSGASFMER	(A)	m:Oxidized methionine	20.17	703.21	2794.35	15.4683	-187.4	Q8INR6	Histone-lysine N-methyltransferase, H3 lysine-79 specific
670	17K03_COLLAB-IT_CTRL_022.3616.3616.0	5	9.76	70.1	21200000	6.62	2	0	0	0	M130m M142m	114	(K)	AEELMTLFKGVAATEDmGTDTSHPQYATmAVFQACRLLK	(K)	C:Carbamidomethylation,m:Oxidized methionine	22.23	873.6	4332.08	31.8901	-22.8	Q9Y1B2	Origin recognition complex subunit 6
549	17K03_COLLAB-IT_CTRL_011.3624.3624.0	4	10.35	71.7	10800000	6.613	3	0	0	0	M1422m	1417	(K)	SFDSTmKLPSLGIEHCTGIKTSSDMASTNIAEK	(K)	C:Carbamidomethylation,m:Oxidized methionine	22.75	894.4	3556.7	17.8814	527.7	Q9V4F9	Mediator of RNA polymerase II transcription subunit 26
685	17K03_COLLAB-IT_CTRL_012.3401.3401.0	4	9.72	64.6	5830000	6.607	2	1	1	0	K205k	183	(R)	EVIRNDVLLLLIELTKGNSNIQk	(I)	k:Ubiquitination-GG	21.26	684.58	2622.52	112.779	-462	Q9W3N6	General vesicular transport factor p115
709	17K03_COLLAB-IT_CTRL_031.4087.4093.0	4	9.6	76.6	3350000	6.594	2	1	1	0	K189k	166	(R)	NAVVVGRSKNVSLPMAILLHADGk	(Y)	k:Ubiquitination-GG	25.46	651.6	2489.4	113.976	-25.7	Q04448	Bifunctional methylenetetrahydrofolate dehydrogenase/cyclohydrolase, mitochondrial
708	17K03_COLLAB-IT_CTRL_013.2811.2811.0	5	9.6	84.1	4920000	6.573	2	1	1	0	K960k M962m M964m	953	(K)	TDRFGASkSmSmTSGGVGSGNGSGSGLGGYK	(I)	k:Ubiquitination-GG,mOxidized methionine	17.51	609.64	2897.32	146.856	270.3	Q24546	Synapsin
660	17K03_COLLAB-IT_CTRL_011.4373.4373.0	5	9.8	63.2	4070000	6.545	1	0	0	0	M152m	146	(R)	LSQSTGmSPRELSENDDLATSLILDPHLGFQTHKMNIR	(F)	m:Oxidized methionine	27.47	854.49	4252.11	16.3084	73.4	Q9W5E0	Histone-lysine N-methyltransferase Suv4-20
729	17K03_COLLAB-IT_CTRL_033.3030.3030.0	4	9.55	74.4	13300000	6.543	2	1	1	0	K733k	714	(R)	YLGWKIHVHDSCDSEAGGLkGAASER	(H)	C:Carbamidomethylation,k:Ubiquitination-GG	18.62	739.88	2843.35	113.145	-303.6	Q9VGY6	Protein Skeletor, isoforms B/C
699	17K03_COLLAB-IT_CTRL_022.2826.2833.0	4	9.65	67	79700000	6.5	2	1	1	0	M588m K613k	587	(R)	AmAAESSAPSPPSSAAANLAKRVTSYk	(L)	m:Oxidized methionine,kUbiquitination-GG	17.31	699.66	2663.35	132.272	799.3	Q8SWR2	Bicaudal D-related protein homolog
745	17K03_COLLAB-IT_CTRL_022.3530.3530.0	5	9.5	67	21500000	6.5	2	1	1	0	M240m K255k	215	(R)	LENVAINECCCLVYTSGTVGMPKGVmLSHDNITFDVRGIVk	(A)	C:Carbamidomethylation,m:Oxidized methionine,kUbiquitination-GG	21.66	946.68	4597.24	132.133	443	Q9V3S9	Very long-chain-fatty-acid--CoA ligase bubblegum
737	17K03_COLLAB-IT_CTRL_021.1865.1865.0	4	9.52	87.2	6750000	6.497	3	1	1	0	K1153k	1135	(K)	GPTATLVPIGSPKTPVSGkDTCTTPK	(S)	C:Carbamidomethylation,k:Ubiquitination-GG	11.53	681.98	2610.38	114.517	174.1	P39769	Polyhomeotic-proximal chromatin protein
750	17K03_COLLAB-IT_CTRL_021.1805.1810.0	5	9.49	73.7	20200000	6.481	1	0	0	0	M63m	42	(K)	IPLGTSQLQNMQQSQQSNVGPmLSSQK	(K)	m:Oxidized methionine	11.16	589.6	2929.45	14.5203	-500.9	P09774	Achaete-scute complex protein T3
752	17K03_COLLAB-IT_CTRL_021.2743.2743.0	4	9.48	78.1	19100000	6.432	2	1	1	0	K259k	230	(K)	EGDKLIGITSFVSAYGCQVGGPAGFTRVTk	(Y)	C:Carbamidomethylation,k:Ubiquitination-GG	16.76	808.04	3115.59	113.55	-152.6	P17207	Serine protease 3
662	17K03_COLLAB-IT_CTRL_011.2351.2428.0	4	9.79	68.5	48800000	6.408	2	1	1	0	M287m K288k	259	(K)	IMLGQSDDVNQLVSGKLAITYSGRDIDAmk	(S)	m:Oxidized methionine,kUbiquitination-GG	14.58	842.35	3238.64	127.734	-684.5	Q7KLV9	26S proteasome non-ATPase regulatory subunit 11
722	17K03_COLLAB-IT_CTRL_022.3322.3322.0	5	9.56	65.6	17100000	6.36	3	2	2	0	K297k K301k M337m	294	(K)	NGVkSMSkDLIAGQLFLFYVAGYETTASTTSFTLYELTQNPEVmEK	(A)	k:Ubiquitination-GG,mOxidized methionine	20.37	1074.43	5122.53	245.589	281	Q9VFP1	Probable cytochrome P450 6d5
796	17K03_COLLAB-IT_CTRL_022.2139.2161.0	5	9.33	76.9	90600000	6.33	1	0	0	0	M1m	1	(-)	mKAFLVICALTLTAVATQARTMDR	(C)	C:Carbamidomethylation,m:Oxidized methionine	13.14	540.57	2681.43	17.3909	517.3	P29615	Lysozyme P
790	17K03_COLLAB-IT_CTRL_031.3760.3760.0	5	9.36	69	9050000	6.308	2	1	1	0	M315m M322m K352k	314	(R)	TmCGTFKYmAPEILCGEPYGHAVDWWALGVIACQMLTQk	(S)	C:Carbamidomethylation,m:Oxidized methionine,kUbiquitination-GG	23.38	936.21	4533.1	143.918	-452.2	Q9VWQ2	Serine/threonine-protein kinase S6KL
753	17K03_COLLAB-IT_CTRL_032.2658.2658.0	3	9.48	64.7	21900000	6.298	2	1	1	0	K967k	952	(K)	DIEDLELNVQKAEQDk	(A)	k:Ubiquitination-GG	16.34	667.59	1886.93	113.821	-110.8	P05661	Myosin heavy chain, muscle
798	17K03_COLLAB-IT_CTRL_023.3617.3636.0	4	9.32	73.4	18600000	6.293	3	2	2	0	M1344m K1359k K1361k	1337	(K)	GSKSSLFmGSTLFGFDHLASAEkDk	(E)	m:Oxidized methionine,kUbiquitination-GG	22.33	726.25	2660.3	241.676	-828.8	A8JQ65	Diacylglycerol kinase eta
51	17K03_COLLAB-IT_CTRL_022.4044.4044.0	3	18.77	91	9510000	6.232	2	1	1	0	K335k	324	(R)	LALLDAMVEMAkNPDIEWNEK	(D)	k:Ubiquitination-GG	24.92	849.39	2430.2	115.951	749.4	Q9V3S0	Cytochrome P450 4g1
831	17K03_COLLAB-IT_CTRL_022.3079.3079.0	3	9.22	65	43900000	6.22	1	0	0	0	M60m M66m	60	(R)	mVRKICmLDDHVVMTFSGLTADAR	(I)	C:Carbamidomethylation,m:Oxidized methionine	18.79	932.72	2766.36	29.7897	-786.9	Q27575	Proteasome subunit alpha type-7-1B
847	17K03_COLLAB-IT_CTRL_033.2847.2847.0	5	9.2	67	7090000	6.187	3	1	1	0	K162k	136	(K)	QEPVKPQEGRAMAEKINAFAYLECSAk	(S)	C:Carbamidomethylation,k:Ubiquitination-GG	17.48	636.57	3065.52	113.303	-232.9	P48148	Ras-like GTP-binding protein Rho1
855	17K03_COLLAB-IT_CTRL_021.3248.3248.0	5	9.18	61.3	47400000	6.18	0	0	0	0	M646m	613	(K)	SEVHQQVAAGLPHLMQSAGGAAAAAAAAVAAQRmVCFSNAR	(I)	C:Carbamidomethylation,m:Oxidized methionine	19.78	819.59	4076.01	17.9085	467.4	Q9W539	Hormone receptor 4
833	17K03_COLLAB-IT_CTRL_032.3248.3248.0	5	9.22	79.2	7680000	6.169	1	0	0	0	M274m	265	(R)	EPVTGWIDNmYGPCGVIVGIGSGVLRVFTGDMDNK	(A)	C:Carbamidomethylation,m:Oxidized methionine	20.11	755.04	3753.81	17.3635	362.9	Q8MS59	Fatty acyl-CoA reductase wat
868	17K03_COLLAB-IT_CTRL_011.3169.3177.0	4	9.14	71.9	5750000	6.139	2	1	1	0	K545k	520	(K)	GNAGAPGDSKLGRPGTPGAAGAPGQk	(G)	k:Ubiquitination-GG	19.77	601.68	2289.17	114.529	202.1	P08120	Collagen alpha-1(IV) chain
769	17K03_COLLAB-IT_CTRL_022.3126.3126.0	5	9.42	68.9	21600000	6.132	2	1	1	0	K313k	312	(R)	FkHLATGHYLAAEAEIDVSAGAMSATSASGHDLHLGDCSK	(D)	C:Carbamidomethylation,k:Ubiquitination-GG	19.11	848.55	4125.94	112.782	-297.6	P29993	Inositol 1,4,5-trisphosphate receptor
875	17K03_COLLAB-IT_CTRL_033.2195.2195.0	4	9.13	80.3	2690000	6.124	2	0	0	0	M82m	77	(K)	MSPDKmAESLCNEIKR	(L)	C:Carbamidomethylation,m:Oxidized methionine	13.4	482.21	1908.9	16.9206	480.6	Q9VS59	Akirin
882	17K03_COLLAB-IT_CTRL_012.3198.3205.0	3	9.1	74.1	10100000	6.097	3	1	1	0	K75k	74	(K)	TkQELEDLMADIKK	(N)	k:Ubiquitination-GG	19.87	593.13	1661.88	115.498	818.4	Q24547	Syntaxin-1A
77	17K03_COLLAB-IT_CTRL_032.3817.3817.0	3	18.09	94.7	73800000	6.091	2	1	1	0	K1502k	1500	(R)	ENkNLADEVKDLLDQIGEGGR	(N)	k:Ubiquitination-GG	23.73	810.18	2313.17	115.357	541.2	P05661	Myosin heavy chain, muscle
838	17K03_COLLAB-IT_CTRL_011.2648.2648.0	4	9.21	69.2	7310000	6.089	2	1	1	0	K2515k M2522m	2513	(K)	MQkALETQEmEIVTLKEQLAIR	(S)	k:Ubiquitination-GG,mOxidized methionine	16.44	684.47	2602.39	132.464	887.1	Q8MSS1	Protein lava lamp
884	17K03_COLLAB-IT_CTRL_013.2504.2510.0	5	9.1	64.7	89400000	6.073	1	1	1	0	M344m K368k	340	(K)	YVQHmYLGFYWLAMSNAMVNPLIYYWMNk	(R)	m:Oxidized methionine,kUbiquitination-GG	15.55	755.98	3646.72	129.153	-234.4	P30974	Tachykinin-like peptides receptor 86C
896	17K03_COLLAB-IT_CTRL_011.2243.2258.0	5	9.07	73.4	17700000	6.06	1	1	1	0	K281k M291m	269	(R)	ISLGISFIGCFMkELPTADALNmCR	(N)	C:Carbamidomethylation,k:Ubiquitination-GG,mOxidized methionine	13.93	595.33	2844.39	128.229	-608.4	Q9VXN9	Peptidoglycan-recognition protein LE
827	17K03_COLLAB-IT_CTRL_033.1807.1814.0	5	9.23	83.4	12000000	6.058	1	1	1	0	M161m K162k	145	(K)	SAITQAPRLLEMLAEGmkTEPDLYQR	(I)	m:Oxidized methionine,kUbiquitination-GG	10.94	619.3	2961.52	130.954	296.1	Q9VZM7	Integrator complex subunit 10
848	17K03_COLLAB-IT_CTRL_011.3672.3672.0	5	9.19	75.4	12200000	6.057	2	2	2	0	M141m K150k K156k	132	(R)	ALCSITDNTmLQAVERYMkQCIVDk	(N)	C:Carbamidomethylation,m:Oxidized methionine,kUbiquitination-GG	23.06	646.64	2987.45	241.725	-729.5	Q8I0G5	Coatomer subunit gamma
870	17K03_COLLAB-IT_CTRL_032.3376.3376.0	3	9.14	70.4	4220000	6.043	2	1	1	0	K920k	914	(R)	FILLSNkAIYVLDGK	(T)	k:Ubiquitination-GG	20.95	603.73	1693.99	115.187	632.2	Q23979	Myosin-IB
821	17K03_COLLAB-IT_CTRL_013.3074.3074.0	3	9.25	70.7	8970000	6.038	2	1	1	0	K518k M521m	515	(K)	LAEkSImGFPSKQR	(L)	k:Ubiquitination-GG,mOxidized methionine	19.17	575.05	1591.86	131.273	716.8	Q9VXH9	WASH complex subunit 4
487	17K03_COLLAB-IT_CTRL_011.1501.1506.2	2	10.84	70.5	4940000	6.037	2	1	1	0	K1502k	1500	(R)	ENkNLADEVK	(D)	k:Ubiquitination-GG	9.22	637.31	1159.6	114.017	-20.1	P05661	Myosin heavy chain, muscle
111	17K03_COLLAB-IT_CTRL_011.2211.2216.3	3	17.31	94.9	176000000	6.036	2	1	1	0	K1790k	1783	(R)	KALEQQIkELQVR	(L)	k:Ubiquitination-GG	13.73	566.49	1582.93	114.528	285.7	P05661	Myosin heavy chain, muscle
793	17K03_COLLAB-IT_CTRL_022.2658.2658.0	5	9.34	66	13100000	6.034	2	1	1	0	M477m K482k	473	(R)	NQSHmGGANkLNGDSNANTNKPLPQRQMR	(Q)	m:Oxidized methionine,kUbiquitination-GG	16.3	662.29	3178.53	128.887	-348	Q8SWR8	Ataxin-2 homolog
823	17K03_COLLAB-IT_CTRL_011.2421.2421.0	4	9.23	71	11800000	6.019	2	1	1	0	K115k	93	(K)	QLRADISKESTAEAIIEFFGGEk	(A)	k:Ubiquitination-GG	15.01	664.33	2539.3	114.994	358.4	Q9VDD9	Putative tRNA (cytidine(32)/guanosine(34)-2'-O)-methyltransferase 2
886	17K03_COLLAB-IT_CTRL_023.3481.3481.0	5	9.09	66	9700000	6.012	1	0	0	0	M738m	711	(R)	AENQNSAMDMDEDDPVPEITSAHFEEAmK	(F)	m:Oxidized methionine	21.45	654.75	3251.34	18.3759	728.2	Q7KN62	Transitional endoplasmic reticulum ATPase TER94
906	17K03_COLLAB-IT_CTRL_013.3737.3744.0	4	9.04	66.3	27600000	6.008	2	1	1	0	K104k	102	(K)	DAkLSVLQHDPDTFALKTLSLHYFEEDDIR	(G)	k:Ubiquitination-GG	23.39	908.5	3516.76	114.214	47	Q9V726	Cleavage and polyadenylation specificity factor subunit 1
922	17K03_COLLAB-IT_CTRL_021.2147.2147.0	3	9.02	68.2	12600000	6.007	2	1	1	0	K205k	199	(K)	VVGNSLkSLEVSEEK	(A)	k:Ubiquitination-GG	13.34	577.75	1617.87	113.366	-391	P09491	Tropomyosin-2
852	17K03_COLLAB-IT_CTRL_013.1878.1878.0	4	9.18	66.7	5860000	5.976	1	0	0	0	M94m	81	(R)	REIEIAESEMPGImTLRK	(R)	m:Oxidized methionine	11.59	529.94	2103.09	13.6445	-1110.4	P50245	Putative adenosylhomocysteinase 2
691	17K03_COLLAB-IT_CTRL_033.3512.3512.0	3	9.7	70.9	9130000	5.957	3	1	1	0	K928k M930m	928	(R)	kKmAADEVSLADDEGAPNGEGEK	(K)	k:Ubiquitination-GG,mOxidized methionine	21.76	830.97	2361.09	129.808	-92.3	P19334	Transient receptor potential protein
951	17K03_COLLAB-IT_CTRL_022.2254.2257.0	4	8.96	61	18400000	5.916	2	1	1	0	K331k	321	(R)	LYGAHLESELkSETSGNFKR	(L)	k:Ubiquitination-GG	13.89	595.3	2266.15	112.032	-845.6	Q9VXG4	Annexin B11
989	17K03_COLLAB-IT_CTRL_033.3037.3037.0	5	8.91	67.7	10400000	5.911	2	1	1	0	K1569k	1556	(R)	RQMSLTQSEPDSDkDAPIAQGSAHPGK	(S)	k:Ubiquitination-GG	18.67	593.39	2851.36	111.557	-839	A8DYE2	Transient receptor potential cation channel trpm
955	17K03_COLLAB-IT_CTRL_021.1993.1993.0	3	8.95	78.6	7210000	5.909	3	2	2	0	K288k K289k	275	(R)	GKLAIAITANFINkk	(T)	k:Ubiquitination-GG	12.33	610.46	1601.97	227.392	-379.4	Q86BA1	[F-actin]-methionine sulfoxide oxidase Mical
967	17K03_COLLAB-IT_CTRL_012.2770.2789.0	4	8.93	65	219000000	5.903	4	2	2	0	K240k K248k	224	(K)	LLLPLVAKVTKDEQDAkPPPDAYDk	(L)	k:Ubiquitination-GG	17.13	749.06	2764.51	228.705	206.9	Q9VEJ2	Nucleolar protein 14 homolog
986	17K03_COLLAB-IT_CTRL_022.1682.1701.0	4	8.91	69.9	4270000	5.899	2	0	0	0	M729m	717	(R)	SVMTKAELEGLPmDVRVK	(E)	m:Oxidized methionine	10.27	505.49	2003.07	15.8718	-61	Q9U1K1	Protein spire
974	17K03_COLLAB-IT_CTRL_012.1802.1802.0	5	8.92	67.5	1650000	5.877	2	1	1	0	K2112k	2100	(R)	AAVDFNLAVLVEkPTFIVQPESQSIHDYRPVSTK	(V)	k:Ubiquitination-GG	11.04	783.4	3799.01	113.964	-20.1	A8DYP0	Obscurin
813	17K03_COLLAB-IT_CTRL_013.2549.2549.0	4	9.27	70.9	6600000	5.87	2	1	1	0	K79k	73	(K)	VCLVTDkNVVQLPSVKVALDSLAR	(N)	C:Carbamidomethylation,k:Ubiquitination-GG	15.83	684.84	2624.48	111.858	-798.6	Q9W265	Probable hydroxyacid-oxoacid transhydrogenase, mitochondrial
995	17K03_COLLAB-IT_CTRL_032.3543.3543.0	5	8.9	62.7	11600000	5.849	2	1	1	0	K743k	721	(R)	VLRPLRLVSGVPSLQVVLNSILkAMVPLFHIALLVLFVIIIYAIIGLELFSGK	(L)	k:Ubiquitination-GG	22.01	1182.78	5795.53	114.342	50.6	Q24270	Voltage-dependent calcium channel type D subunit alpha-1
770	17K03_COLLAB-IT_CTRL_023.3624.3624.0	5	9.42	70.2	15200000	5.842	3	1	1	0	K176k	173	(R)	WTSkENLLAPGPEEDDPQLFVALYDFQAGGENQLSLKK	(G)	k:Ubiquitination-GG	22.37	873.71	4248.11	116.407	541.7	P00522	Tyrosine-protein kinase Abl
898	17K03_COLLAB-IT_CTRL_022.3307.3307.0	5	9.07	76.1	37300000	5.831	2	0	0	0	M289m	277	(K)	MFRDLTKEIPSImSVLNIHENLIETLLEMQAYADCHAILAK	(Y)	C:Carbamidomethylation,m:Oxidized methionine	20.28	958.4	4771.43	16.5379	113.4	Q9VPB1	Protein ST7 homolog
982	17K03_COLLAB-IT_CTRL_012.1801.1805.0	4	8.91	60.6	11300000	5.789	2	1	1	0	K142k M148m	132	(K)	LSTVSSAYSFkEPRGAmEEQK	(A)	k:Ubiquitination-GG,mOxidized methionine	11.03	619.3	2345.14	129.034	-405.7	Q9VU84	Drebrin-like protein
1029	17K03_COLLAB-IT_CTRL_031.2088.2088.0	5	8.81	75.9	2700000	5.778	2	1	1	0	K176k	146	(K)	RAVVSLLQSGIEAEHEVDVFGMCPTHTSTSkVGNANIITK	(A)	C:Carbamidomethylation,k:Ubiquitination-GG	12.87	882.65	4296.18	113.046	-226.2	Q9V496	Apolipophorins
1057	17K03_COLLAB-IT_CTRL_023.3631.3631.0	4	8.75	79.2	12500000	5.748	2	1	1	0	K1693k	1687	(K)	LLNEVEkQRSFSPVPLMGSK	(S)	k:Ubiquitination-GG	22.41	593.63	2259.22	112.282	-742.7	A0A1F4	Protein eyes shut
736	17K03_COLLAB-IT_CTRL_023.3370.3370.0	4	9.52	63.7	7580000	5.727	3	2	2	0	K1054k K1057k	1029	(K)	FSSSKNICPVTESVAAANAAEILNDkTLk	(R)	C:Carbamidomethylation,k:Ubiquitination-GG	20.76	827.14	3078.58	226.961	-340.4	Q9VJJ7	Transient receptor potential-gamma protein
1063	17K03_COLLAB-IT_CTRL_013.3027.3027.0	4	8.73	88.9	4650000	5.726	3	2	2	0	K217k K228k M238m	215	(K)	NPkNYLPLAPIFFkLMTTSTNNWmLIK	(I)	k:Ubiquitination-GG,mOxidized methionine	18.86	860.2	3195.71	242.068	-585.4	P54362	AP-3 complex subunit delta
1067	17K03_COLLAB-IT_CTRL_031.2578.2578.0	5	8.73	66.2	33300000	5.713	1	1	1	0	M1003m K1020k	984	(K)	QQHLNTASSAASSITTSSGmSSITQHTVLNMASDVGk	(K)	m:Oxidized methionine,kUbiquitination-GG	15.91	776.21	3747.79	129.23	-208.5	Q9VT28	Protein furry
1076	17K03_COLLAB-IT_CTRL_012.1854.1854.0	4	8.7	91.6	15400000	5.696	0	0	0	0	M75m	56	(R)	AFMPGGEFQNASITEYTSAmR	(K)	m:Oxidized methionine	11.36	582.21	2308.04	17.7809	767.9	Q7KR10	Probable cytochrome P450 12d1 distal, mitochondrial
604	17K03_COLLAB-IT_CTRL_011.3588.3588.0	5	10.03	69.7	5080000	5.692	2	1	1	0	M415m K416k	394	(K)	DHSDVSNQLYACYAIGKDVQAmk	(A)	C:Carbamidomethylation,m:Oxidized methionine,kUbiquitination-GG	22.53	549.69	2613.21	131.214	428.5	P31409	V-type proton ATPase subunit B
1086	17K03_COLLAB-IT_CTRL_033.2960.2960.0	5	8.68	63.8	13500000	5.677	1	1	1	0	M84m K86k M98m M102m	79	(K)	RSFYTmTkPTPPCQSQEPEmCLLmASVTRAMR	(H)	C:Carbamidomethylation,m:Oxidized methionine,kUbiquitination-GG	18.18	794.47	3804.78	163.539	380.8	Q9VFK3	Male-specific protein scotti
1020	17K03_COLLAB-IT_CTRL_013.2593.2593.0	5	8.83	68.8	19600000	5.676	2	1	1	0	K221k	191	(K)	DGFLQIENSREEDQGKYECVAENSMGTEHSk	(A)	C:Carbamidomethylation,k:Ubiquitination-GG	16.11	741.31	3587.57	114.956	246.6	P16621	Tyrosine-protein phosphatase Lar
1085	17K03_COLLAB-IT_CTRL_031.4119.4119.0	4	8.68	83.8	7630000	5.675	2	1	1	0	M345m K354k	342	(K)	GQDmGCHPEEPGkICAAAPPTLNEYEKQENLR	(A)	C:Carbamidomethylation,m:Oxidized methionine,kUbiquitination-GG	25.66	943.59	3639.66	131.676	434.3	Q9V333	Probable lysine-specific demethylase 4A
963	17K03_COLLAB-IT_CTRL_022.1964.1964.0	2	8.94	65.1	5720000	5.671	2	1	1	0	K41k	38	(K)	EDSkEWVPVTK	(L)	k:Ubiquitination-GG	12.04	716.43	1317.67	114.184	98.7	P31009	40S ribosomal protein S2
1069	17K03_COLLAB-IT_CTRL_022.3483.3483.0	5	8.72	82.6	11100000	5.661	2	1	1	0	M26m K66k	22	(R)	ELQEmETTPPEGIKVLINESDVTDIQALIDGPAGTPYAAGIFRVk	(L)	m:Oxidized methionine,kUbiquitination-GG	21.36	991.82	4826.48	128.59	-292.2	Q9VX25	Ubiquitin-conjugating enzyme E2 S
714	17K03_COLLAB-IT_CTRL_031.2609.2609.0	5	9.59	60.9	40000000	5.66	2	1	1	0	K1258k	1234	(K)	SEESTSPDSKSNVATGAATVHDCAkVDLENAELR	(R)	C:Carbamidomethylation,k:Ubiquitination-GG	16.1	741.52	3588.67	114.899	231.2	P54623	Centrosomin
1088	17K03_COLLAB-IT_CTRL_021.4022.4022.0	5	8.67	70.4	8120000	5.659	1	1	1	0	M1168m K1184k	1159	(R)	LQDMLNTPNmLNWTYRFNAFELFNFkTVR	(E)	m:Oxidized methionine,kUbiquitination-GG	24.69	751.47	3623.79	129.528	-135.8	Q9W1X7	Mediator of RNA polymerase II transcription subunit 23
600	17K03_COLLAB-IT_CTRL_033.2516.2523.0	4	10.07	64.1	14200000	5.658	2	0	0	0	M21m	8	(K)	SPRPLKITIVGDGmVGKTCMLITYTR	(N)	C:Carbamidomethylation,m:Oxidized methionine	15.46	731.88	2907.56	16.9365	322	Q24192	Ras-like GTP-binding protein RhoL
1083	17K03_COLLAB-IT_CTRL_013.2586.2586.0	5	8.68	66.1	5530000	5.637	1	1	1	0	M67m K104k	62	(K)	SQNACmLFLPECCDFVGESRTQTIELSEGLDGELMAQYRELAk	(C)	C:Carbamidomethylation,m:Oxidized methionine,kUbiquitination-GG	16.06	1025.9	4996.29	129.178	-167.8	O76464	Nitrilase and fragile histidine triad fusion protein NitFhit
1104	17K03_COLLAB-IT_CTRL_023.3832.3832.0	5	8.63	74.4	8180000	5.628	2	1	1	0	K140k	140	(K)	kTDGEEELITNLNDVYNLGTFAQIQELQDLGDKLR	(M)	k:Ubiquitination-GG	23.68	822.46	3993.01	115.262	296.8	Q7KUT2	Lon protease homolog, mitochondrial
1106	17K03_COLLAB-IT_CTRL_023.3258.3258.0	5	8.63	75.7	13000000	5.614	2	1	1	0	K396k M416m	394	(R)	TVkAQSLWFAIIEAQVETGNPYmLFKDACNR	(K)	C:Carbamidomethylation,k:Ubiquitination-GG,mOxidized methionine	20	747.37	3600.8	132.023	531.8	P48591	Ribonucleoside-diphosphate reductase large subunit
1113	17K03_COLLAB-IT_CTRL_031.2490.2490.2	2	8.62	72.3	12400000	5.608	2	1	1	0	K263k	255	(R)	ILKFNAAGkLLR	(T)	k:Ubiquitination-GG	15.37	729.84	1343.85	114.821	533.1	Q9W1L5	Peptidyl-alpha-hydroxyglycine alpha-amidating lyase 2
1118	17K03_COLLAB-IT_CTRL_023.2658.2658.0	4	8.61	70.7	8210000	5.607	2	1	1	0	K204k	203	(K)	EkATPTAASTAANILDGIHSLK	(K)	k:Ubiquitination-GG	16.34	581.2	2209.18	112.596	-623.2	Q9VXG1	Zinc finger protein hangover
1123	17K03_COLLAB-IT_CTRL_011.2898.2898.0	5	8.6	75.5	15900000	5.583	3	0	0	0	M421m	406	(R)	KSLFGMLATLVTYELmLLQIDAKSHK	(G)	m:Oxidized methionine	18.03	593.72	2950.61	13.9565	-687.6	Q9W0M2	Gustatory receptor for sugar taste 61a
1082	17K03_COLLAB-IT_CTRL_011.3501.3501.0	4	8.68	61.1	7100000	5.569	0	0	0	0	M798m	777	(R)	LMCELNIMPLALQITNICGNTmTRTLQGGR	(S)	C:Carbamidomethylation,m:Oxidized methionine	21.96	859.94	3419.71	17.0293	301	P26019	DNA polymerase alpha catalytic subunit
1136	17K03_COLLAB-IT_CTRL_013.4129.4129.0	4	8.56	76.5	4760000	5.562	2	1	1	0	M197m K217k	184	(K)	ALQDVTADEFHLCmTILGATKLGSTITGHAELVk	(L)	C:Carbamidomethylation,m:Oxidized methionine,kUbiquitination-GG	25.85	944.08	3640.87	132.427	633.1	Q9V431	Apoptosis inhibitor 5 homolog
1138	17K03_COLLAB-IT_CTRL_022.2978.2978.0	4	8.56	72.8	30000000	5.555	2	1	1	0	K148k M151m	142	(K)	HPESTTkSImPSSSSSGSGASNDK	(E)	k:Ubiquitination-GG,mOxidized methionine	18.19	628.6	2379.07	132.305	902.9	Q9VLT5	Protein purity of essence
915	17K03_COLLAB-IT_CTRL_021.3133.3133.0	5	9.03	69.5	37000000	5.546	1	1	1	0	M39m K45k	6	(R)	QCIVVNMRSAIVLIMIFVLTGIRNSETASGGNQmDLSDSk	(G)	C:Carbamidomethylation,m:Oxidized methionine,kUbiquitination-GG	19.08	900.04	4368.22	127.953	-463.8	Q9U4H5	TM2 domain-containing protein almondex
1147	17K03_COLLAB-IT_CTRL_023.3069.3069.0	3	8.54	65.6	21100000	5.52	2	1	1	0	M1082m K1100k	1082	(K)	mKASTVGAAGEQTAATEAk	(R)	m:Oxidized methionine,kUbiquitination-GG	18.84	650.89	1821.9	128.754	-658	Q3LHL9	Protein winged eye
1171	17K03_COLLAB-IT_CTRL_021.3464.3464.0	4	8.51	72.6	19100000	5.505	2	1	1	0	K827k	801	(K)	VTSNCCFASEGSALILNNRQKDFDGHk	(K)	C:Carbamidomethylation,k:Ubiquitination-GG	21.18	796.99	3068.43	116.507	773.6	Q23989	Villin-like protein quail
333	17K03_COLLAB-IT_CTRL_032.2602.2602.0	3	12.95	70.6	12300000	5.48	2	1	1	0	K1471k	1457	(K)	LKVDDLAAELDASQkECR	(N)	C:Carbamidomethylation,k:Ubiquitination-GG	15.99	725.61	2061.03	113.787	-117.5	P05661	Myosin heavy chain, muscle
1193	17K03_COLLAB-IT_CTRL_032.4299.4299.0	3	8.48	68	6110000	5.472	3	2	2	0	K854k K862k	840	(R)	TSLSKAEFAAALGMkPNDMFVRk	(M)	k:Ubiquitination-GG	26.76	914.08	2512.3	227.92	-60.4	Q9VQH2	Dual oxidase
958	17K03_COLLAB-IT_CTRL_032.3480.3480.0	3	8.95	81.6	9850000	5.46	1	0	0	0	M1m	1	(-)	mTTAALKRDEILLLFDVDGTLTMPR	(S)	m:Oxidized methionine	21.6	946.43	2820.5	16.7756	275.2	Q9VTZ6	Probable phosphomannomutase
1198	17K03_COLLAB-IT_CTRL_023.2801.2801.0	3	8.47	65.8	18600000	5.447	2	0	0	0	M498m	492	(R)	RPMNAFmIFSKKHR	(K)	m:Oxidized methionine	17.21	593.45	1762.94	15.3999	-334.6	Q9U1H0	Putative transcription factor capicua
1157	17K03_COLLAB-IT_CTRL_033.3736.3736.0	5	8.53	69.2	5520000	5.429	2	1	1	0	M1186m K1193k	1184	(R)	DQmMTANVNkALIANMFHDDFRYHLK	(V)	m:Oxidized methionine,kUbiquitination-GG	23.18	651.31	3123.5	129.025	-311.5	Q9VEZ3	Protein mini spindles
1221	17K03_COLLAB-IT_CTRL_013.3446.3446.0	4	8.42	68.4	5640000	5.422	0	0	0	0	M1776m	1760	(R)	SSVRVPTGSNMVFIDPmALRR	(S)	m:Oxidized methionine	21.55	587.75	2333.22	14.7565	-527.4	P51592	E3 ubiquitin-protein ligase hyd
1048	17K03_COLLAB-IT_CTRL_033.4377.4389.0	4	8.77	79.5	4620000	5.414	3	1	1	0	M39m K54k	26	(K)	EALAKLMESAESCmPEVGATDADLQEMVkK	(Q)	C:Carbamidomethylation,m:Oxidized methionine,kUbiquitination-GG	27.23	854.05	3281.54	131.637	468.6	P54195	General odorant-binding protein 28a
1200	17K03_COLLAB-IT_CTRL_031.3372.3372.0	5	8.47	69.1	12300000	5.391	3	2	2	0	M893m K929k K930k	884	(K)	GSFYLVFEYmDHDLMGLLESGMVDFNEENNASIMKQLLDGLNYCHkk	(N)	C:Carbamidomethylation,m:Oxidized methionine,kUbiquitination-GG	20.94	1152.81	5515.55	244.476	68.6	Q9VP22	Cyclin-dependent kinase 12
1235	17K03_COLLAB-IT_CTRL_021.2783.2790.0	4	8.4	72.5	80600000	5.386	2	1	1	0	K1233k	1228	(K)	QHTGLkPGVNSGPASK	(K)	k:Ubiquitination-GG	16.98	423.33	1577.84	112.459	-937.2	Q9VP05	Mediator of RNA polymerase II transcription subunit 1
1252	17K03_COLLAB-IT_CTRL_032.3481.3481.0	5	8.38	66.7	18300000	5.38	2	1	1	0	K50k M65m	42	(R)	YRILISDGkYFNSYAMLASQLNVmQHNGELEEFTIVQLDK	(Y)	k:Ubiquitination-GG,mOxidized methionine	21.6	962.25	4678.33	128.889	-239	Q24492	Replication protein A 70 kDa DNA-binding subunit
1143	17K03_COLLAB-IT_CTRL_022.3431.3431.0	5	8.55	65.8	9630000	5.377	0	0	0	0	M797m	797	(R)	mYATTPVGVVMGLAWTAMGGSSLYIETSRRHIR	(Q)	m:Oxidized methionine	21.04	726.23	3611.83	15.2925	-193.6	Q7KUT2	Lon protease homolog, mitochondrial
1130	17K03_COLLAB-IT_CTRL_031.2336.2336.0	4	8.59	64.1	9880000	5.368	2	1	1	0	M474m K476k M483m	474	(K)	mIkQQGRDTmDISNAALFPEPHSIK	(E)	m:Oxidized methionine,kUbiquitination-GG	14.47	743.91	2827.42	145.195	-281.7	Q9VRH6	Translation factor waclaw, mitochondrial
1161	17K03_COLLAB-IT_CTRL_021.3755.3755.0	4	8.52	67.1	15800000	5.355	2	1	1	0	K1036k	1001	(K)	VAPLNPALTFLNSIHYHTADEANDASKVCMDHDHEk	(L)	C:Carbamidomethylation,k:Ubiquitination-GG	22.99	1044.26	4060.89	113.126	-219.5	Q9VYN8	Teneurin-a
1115	17K03_COLLAB-IT_CTRL_013.3815.3815.0	5	8.61	60.6	6380000	5.35	3	0	0	0	M7m M10m M13m M34m	6	(K)	ImNImNGmKSLEDHCQLISDVKDESPMQmFYK	(D)	C:Carbamidomethylation,m:Oxidized methionine	23.88	779.9	3832.76	62.7164	-324.3	Q8MS59	Fatty acyl-CoA reductase wat
1253	17K03_COLLAB-IT_CTRL_013.2396.2396.0	5	8.37	66.4	9710000	5.35	2	1	1	0	M1m K10k	1	(-)	mSKDIYYSDkYYDEQFEYR	(H)	m:Oxidized methionine,kUbiquitination-GG	14.87	535.93	2543.11	132.514	925.4	Q24152	Cyclin-dependent kinases regulatory subunit
1227	17K03_COLLAB-IT_CTRL_023.2416.2416.0	4	8.41	70.6	8100000	5.349	1	1	1	0	K17k M27m	15	(R)	NEkGNPDSVHSSmRGSMSSTR	(R)	k:Ubiquitination-GG,mOxidized methionine	14.86	599.36	2264.01	130.404	152.9	Q76NQ1	Inactive rhomboid protein 1
1275	17K03_COLLAB-IT_CTRL_023.3658.3658.0	3	8.33	76.1	10700000	5.334	1	1	1	0	K7k M12m	1	(-)	MSDAVDkMLAGmAANRQTMNR	(Q)	k:Ubiquitination-GG,mOxidized methionine	22.58	814.86	2311.08	131.488	593.7	Q9W0G7	Augmin complex subunit msd1
552	17K03_COLLAB-IT_CTRL_013.3243.3248.0	5	10.34	63.1	5810000	5.302	3	2	2	0	K297k K301k M337m	294	(K)	NGVkSMSkDLIAGQLFLFYVAGYETTASTTSFTLYELTQNPEVmEK	(A)	k:Ubiquitination-GG,mOxidized methionine	20.28	1073.98	5122.53	243.339	-138.2	Q9VFP1	Probable cytochrome P450 6d5
1290	17K03_COLLAB-IT_CTRL_022.2730.2734.0	4	8.31	69.7	46000000	5.294	1	0	0	0	M2920m	2919	(R)	TmSHVALLQKMTDGAGAVAR	(L)	m:Oxidized methionine	16.73	519.12	2057.06	16.3951	193	Q70PP2	Serine/threonine-protein kinase Smg1
1293	17K03_COLLAB-IT_CTRL_011.2869.2869.0	5	8.3	75.8	3800000	5.28	1	0	0	0	M341m	337	(K)	TREPmLAGMTNEPMK	(L)	m:Oxidized methionine	17.85	345.41	1705.81	17.2139	707.5	Q8I0P1	Spastin
1305	17K03_COLLAB-IT_CTRL_011.3137.3137.0	3	8.28	71.9	10000000	5.275	2	1	1	0	K583k	574	(R)	IRDMQPPNLkNAHK	(V)	k:Ubiquitination-GG	19.57	593.09	1661.89	115.365	743.9	Q9VXE5	Serine/threonine-protein kinase PAK mbt
1280	17K03_COLLAB-IT_CTRL_023.3293.3293.0	3	8.32	82.5	11100000	5.271	3	2	2	0	K316k K317k	294	(R)	EAQEKIVACEIALSAAATAQNAkk	(V)	C:Carbamidomethylation,k:Ubiquitination-GG	20.27	914.65	2515.32	226.617	-535.7	P91928	MICOS complex subunit Mic60
1247	17K03_COLLAB-IT_CTRL_021.3367.3367.0	5	8.38	71.9	12000000	5.261	3	1	1	0	K682k M683m M694m M698m M705m	676	(K)	LLELQSkmLFQTKSVPNHmYSSmPHEWPLmDK	(G)	k:Ubiquitination-GG,mOxidized methionine	20.57	805.46	3845.89	177.382	-159.1	Q9VTK2	Protein O-mannosyltransferase 1
865	17K03_COLLAB-IT_CTRL_022.3594.3594.0	5	9.16	70.7	9660000	5.251	3	1	1	0	K470k M498m M517m	469	(R)	NkLDSFPGGVPNTLSYTGEQWDAPNVWAPmQYILVEGLNNLNTPEAKNmSLK	(W)	k:Ubiquitination-GG,mOxidized methionine	22.1	1182.86	5761.83	148.44	407.4	Q9W2M2	Trehalase
1322	17K03_COLLAB-IT_CTRL_012.2881.2881.0	4	8.25	69.8	11400000	5.244	2	1	1	0	M213m K218k	206	(R)	DKECGVTmTFDTkNSTFTR	(T)	C:Carbamidomethylation,m:Oxidized methionine,kUbiquitination-GG	17.84	593.18	2238.02	131.682	693.7	P16554	Protein numb
1203	17K03_COLLAB-IT_CTRL_033.2105.2105.0	4	8.47	62.9	8480000	5.242	1	1	1	0	M137m K140k	113	(K)	WISLNTLALVTETSVFHWSMEGDSmPQk	(M)	m:Oxidized methionine,kUbiquitination-GG	12.81	834.94	3207.55	129.189	-254.3	P29742	Clathrin heavy chain
1328	17K03_COLLAB-IT_CTRL_022.1646.1674.0	5	8.25	84.9	10600000	5.241	3	1	1	0	K216k	209	(K)	TTTCAAKkPTAAQATTTTAK	(N)	C:Carbamidomethylation,k:Ubiquitination-GG	10.04	428.3	2023.05	114.422	177.4	P29617	Homeobox protein prospero
1301	17K03_COLLAB-IT_CTRL_011.2571.2571.0	5	8.29	66.3	7490000	5.224	2	1	1	0	K573k M578m	567	(R)	TPGTLQkPTPSmRSISAVDTAAAQRAK	(V)	k:Ubiquitination-GG,mOxidized methionine	15.96	583.15	2783.48	128.238	-618.3	Q9NBD7	CLIP-associating protein
1244	17K03_COLLAB-IT_CTRL_033.2688.2688.0	5	8.39	80.3	3780000	5.221	2	0	0	0	M672m	667	(R)	SQYTSmIEHMKSSAYVPQVQKQIAQEQER	(M)	m:Oxidized methionine	16.53	688.44	3424.66	13.5085	-723.2	Q8INR6	Histone-lysine N-methyltransferase, H3 lysine-79 specific
1184	17K03_COLLAB-IT_CTRL_031.1933.1933.0	4	8.49	65.6	7960000	5.214	3	1	1	0	K46k	27	(K)	ATAVNLEEAKPYADIPGPSkLQLIRAFLPGGLYK	(N)	k:Ubiquitination-GG	11.9	939.96	3641.01	115.808	469.8	Q9VGZ0	Probable cytochrome P450 12e1, mitochondrial
1331	17K03_COLLAB-IT_CTRL_033.3507.3507.0	5	8.25	69.2	5000000	5.21	1	0	0	0	M873m	864	(K)	LAQIVCATVmAGELSLMAALVNSDLVKSHMR	(H)	C:Carbamidomethylation,m:Oxidized methionine	21.73	669.54	3328.72	14.9461	-313.7	P14773	3-hydroxy-3-methylglutaryl-coenzyme A reductase
606	17K03_COLLAB-IT_CTRL_032.2867.2867.0	5	10.03	71.3	12800000	5.202	1	0	0	0	M516m	477	(R)	VETTITRQAATSMAAGPASSSQLSGNVLATATATATATAmATSGRTETK	(T)	m:Oxidized methionine	17.65	952.76	4742.36	17.4138	298.1	Q9W2Q7	Inositol-pentakisphosphate 2-kinase
1359	17K03_COLLAB-IT_CTRL_013.1940.1940.0	4	8.19	86.4	3340000	5.172	3	2	2	0	K187k K191k	176	(K)	QVVDEVKPQEPkIDAk	(S)	k:Ubiquitination-GG	11.98	513.81	1822.99	229.227	556.2	P29746	Protein bangles and beads
1289	17K03_COLLAB-IT_CTRL_023.3254.3254.0	5	8.31	61.8	10700000	5.142	3	2	2	0	K635k M645m K646k	603	(R)	SHVAPCIKVPTNANMIQAESAGGGGGGGTGDYkDGGGSQVEEmk	(K)	C:Carbamidomethylation,k:Ubiquitination-GG,mOxidized methionine	19.98	913.73	4318.98	245.645	342.6	Q24568	Netrin-B
1371	17K03_COLLAB-IT_CTRL_012.3765.3765.0	4	8.16	77	3500000	5.14	3	2	2	0	K567k K575k	554	(K)	KPRYVITMQQGSQkAASQPVQk	(L)	k:Ubiquitination-GG	23.57	676.55	2473.33	229.844	650.3	A1Z9E2	Protein lin-54 homolog
1330	17K03_COLLAB-IT_CTRL_032.3781.3785.0	4	8.25	61.7	12400000	5.128	2	1	1	0	K97k	62	(R)	ITPSYVAFTADGERLIGDAAKNQLTTNPENTVFDAk	(R)	k:Ubiquitination-GG	23.5	995.77	3867.94	112.118	-483.6	P29844	Heat shock 70 kDa protein cognate 3
1395	17K03_COLLAB-IT_CTRL_022.3897.3905.0	3	8.12	68	40900000	5.108	2	1	1	0	M558m M559m K561k	534	(K)	DPGLLISSSSVYLPGVNNKVTHSSmmSk	(K)	m:Oxidized methionine,kUbiquitination-GG	24	1031.94	2948.49	145.32	-230.4	Q9W4S7	Myc protein
1156	17K03_COLLAB-IT_CTRL_011.3250.3250.0	5	8.53	70.1	7160000	5.103	1	1	1	0	M55m K78k	44	(K)	VNDTAQVVIIDmNDATNPTRRPISADSAIMNPASk	(V)	m:Oxidized methionine,kUbiquitination-GG	20.34	772.02	3725.86	130.212	45.3	P29742	Clathrin heavy chain
1382	17K03_COLLAB-IT_CTRL_031.3338.3338.0	5	8.15	78.1	12800000	5.098	1	1	1	0	M730m K759k	720	(R)	SLPARSVAMLmASPSSEEQSVATSTTEPAIISDARLGEFk	(N)	m:Oxidized methionine,kUbiquitination-GG	20.72	859.44	4165.08	128.092	-453.3	Q9XYU1	DNA replication licensing factor Mcm3
122	17K03_COLLAB-IT_CTRL_031.2198.2204.3	3	17.1	90.8	310000000	5.085	2	1	1	0	K1790k	1783	(R)	KALEQQIkELQVR	(L)	k:Ubiquitination-GG	13.61	566.49	1582.93	114.528	285.7	P05661	Myosin heavy chain, muscle
1418	17K03_COLLAB-IT_CTRL_031.3184.3211.0	5	8.07	73	84200000	5.066	3	2	2	0	M137m K160k K164k	136	(R)	YmPQNACVIATKTPSSDVLVFDYTkHPSkPEPSGECQPDLR	(L)	C:Carbamidomethylation,m:Oxidized methionine,kUbiquitination-GG	19.74	982.53	4663.23	245.394	267.6	Q24572	Probable histone-binding protein Caf1
1438	17K03_COLLAB-IT_CTRL_033.4241.4247.0	4	8.04	89.3	2110000	5.041	2	1	1	0	K1961k	1949	(K)	ETSRPESAVGSMkDESMSKEPSR	(R)	k:Ubiquitination-GG	26.38	660.75	2525.16	114.817	293.4	Q9W596	Microtubule-associated protein futsch
920	17K03_COLLAB-IT_CTRL_022.3576.3576.0	5	9.02	62.4	11900000	5.037	2	1	1	0	M72m M87m K100k	68	(K)	DKPCmLGVDEAGRGPVLGPmVYGISYCPLESNk	(A)	C:Carbamidomethylation,m:Oxidized methionine,kUbiquitination-GG	21.96	752.2	3609.72	147.25	324	Q9VPP5	Ribonuclease H2 subunit A
1434	17K03_COLLAB-IT_CTRL_012.2263.2263.0	4	8.04	81.4	12300000	5.037	2	2	2	0	K5k M11m K18k	1	(-)	MHTPkCRRPSmSATLSHk	(D)	C:Carbamidomethylation,k:Ubiquitination-GG,mOxidized methionine	13.97	592.92	2125.06	243.601	-202.7	Q9VQE9	Transmembrane and TPR repeat-containing protein CG31690
1360	17K03_COLLAB-IT_CTRL_013.1779.1786.0	5	8.19	83.4	12400000	5.029	1	1	1	0	M161m K162k	145	(K)	SAITQAPRLLEMLAEGmkTEPDLYQR	(I)	m:Oxidized methionine,kUbiquitination-GG	10.98	619.32	2961.52	131.054	328.5	Q9VZM7	Integrator complex subunit 10
1428	17K03_COLLAB-IT_CTRL_012.2197.2197.0	3	8.05	80.8	6450000	5.024	2	1	1	0	K205k	199	(K)	VVGNSLkSLEVSEEK	(A)	k:Ubiquitination-GG	13.54	577.72	1617.87	113.276	-443	P09491	Tropomyosin-2
614	17K03_COLLAB-IT_CTRL_033.2400.2400.0	3	10	77.2	4210000	5.002	2	1	1	0	K153k	153	(R)	kMIAPTFHQSILK	(S)	k:Ubiquitination-GG	14.68	543.61	1513.86	114.96	562.7	Q9V3S0	Cytochrome P450 4g1
1226	17K03_COLLAB-IT_CTRL_021.1957.1957.0	5	8.41	61	15400000	5.001	2	1	1	0	M1m K8k M20m	1	(-)	mSFHLSTkERLLLLIDDIEmIAK	(E)	m:Oxidized methionine,kUbiquitination-GG	12.11	573.02	2716.48	144.593	-503.1	Q9VS38	Mediator of RNA polymerase II transcription subunit 4
1333	17K03_COLLAB-IT_CTRL_033.2867.2867.0	5	8.24	64	5950000	4.964	3	1	1	0	M401m M420m K427k	395	(R)	QAKYYLmETHYNNLKPDFAQLHARQmADNSGLk	(I)	m:Oxidized methionine,kUbiquitination-GG	17.6	809.14	3895.9	145.77	-65	Q6NP60	MOXD1 homolog 2
1114	17K03_COLLAB-IT_CTRL_013.2537.2537.0	4	8.61	68.5	72000000	4.955	0	0	0	0	M1940m M1945m	1923	(R)	GPMHSGELSAGHIGDSGmDVDQmPTSSQR	(D)	m:Oxidized methionine	15.76	755.42	2984.29	34.365	786.8	A1Z8P9	Nucleoprotein TPR
1485	17K03_COLLAB-IT_CTRL_021.3886.3893.0	4	7.97	63.3	20400000	4.954	2	1	1	0	K377k	352	(K)	EQLTWEPSILTNLTDLGKQVAEPLRk	(S)	k:Ubiquitination-GG	23.84	774.52	2979.61	115.443	452.4	Q9VIF5	Protein deadlock
1390	17K03_COLLAB-IT_CTRL_022.1966.1966.0	4	8.13	64.8	4650000	4.951	2	1	1	0	M206m K217k	191	(K)	ASDLEGKEFEFHVIPmVDDFDYEPFYk	(E)	m:Oxidized methionine,kUbiquitination-GG	12.05	850.52	3267.49	131.571	451.2	Q23976	ATP-dependent DNA helicase 2 subunit 1
529	17K03_COLLAB-IT_CTRL_021.3874.3891.0	4	10.46	72.6	39100000	4.94	4	1	1	0	K198k M218m	195	(R)	VNHkPILMTGPLNLTLVVNSTGSmHCKYLSDLTSKK	(A)	C:Carbamidomethylation,k:Ubiquitination-GG,mOxidized methionine	23.75	1031.97	3997.11	127.751	-554.4	Q07407	Fibroblast growth factor receptor homolog 1
1008	17K03_COLLAB-IT_CTRL_021.2330.2330.0	5	8.86	67.6	15700000	4.926	2	1	1	0	M646m K665k	630	(K)	DDAEARKQNEQNAVATmHHNGSGVGVALASASLGGk	(T)	m:Oxidized methionine,kUbiquitination-GG	14.4	744.55	3590.74	127.984	-552.2	P10041	Neurogenic locus protein delta
1472	17K03_COLLAB-IT_CTRL_023.2925.2931.0	4	7.99	65.9	30100000	4.925	1	0	0	0	M133m	132	(K)	EmRNILTPAFTGSKMR	(I)	m:Oxidized methionine	17.96	467.35	1851.96	14.4214	-843.1	Q9V6H1	Probable cytochrome P450 9h1
1450	17K03_COLLAB-IT_CTRL_031.3124.3124.0	5	8.03	68.5	12300000	4.91	2	1	1	0	K271k	232	(R)	SNSKESAAMHSPSAAAAAAAAAAQIASSNRLQEAALAAAk	(E)	k:Ubiquitination-GG	19.36	777.23	3765.89	116.227	562.7	Q9VJS8	Zinc finger protein Elbow
1548	17K03_COLLAB-IT_CTRL_033.3667.3667.0	3	7.9	90.6	1280000	4.904	1	0	0	0	M42m	42	(R)	mSLLSPLDNTESSMESRK	(E)	m:Oxidized methionine	22.74	681.05	2024.96	16.1727	87.1	Q9VX31	Integrator complex subunit 2
1518	17K03_COLLAB-IT_CTRL_031.2768.2772.0	4	7.93	63.1	55800000	4.903	3	1	1	0	K208k	207	(R)	SkIVGTPAAELLKWANATVTVCHSK	(T)	C:Carbamidomethylation,k:Ubiquitination-GG	17.16	699.81	2681.44	114.774	261.4	O96553	C-1-tetrahydrofolate synthase, cytoplasmic
795	17K03_COLLAB-IT_CTRL_022.3242.3242.0	4	9.33	86.2	23200000	4.901	2	1	1	0	M192m K217k	188	(R)	HFGAmPTLKLGGAGGASGVPSGATGSSRPk	(K)	m:Oxidized methionine,kUbiquitination-GG	19.84	721.49	2753.41	129.523	-178.6	P23803	Protein odd-skipped
1543	17K03_COLLAB-IT_CTRL_023.2783.2804.0	4	7.9	75	49900000	4.9	2	1	1	0	K17335k	17322	(K)	SKRTIPTIDEQSAk	(L)	k:Ubiquitination-GG	17.1	423.28	1573.85	116.244	1302.2	Q9I7U4	Titin
1534	17K03_COLLAB-IT_CTRL_021.3491.3491.0	4	7.91	85	23200000	4.898	2	1	1	0	M357m K359k	342	(R)	VQLASAVEAERYILNmIkSGEIYASINQK	(D)	m:Oxidized methionine,kUbiquitination-GG	21.34	842.63	3238.71	128.784	-372.3	Q8SYG2	COP9 signalosome complex subunit 3
1546	17K03_COLLAB-IT_CTRL_031.2334.2350.0	5	7.9	68.9	23100000	4.898	2	1	1	0	K34k	9	(K)	LIVPNQIGYLILKEDGAVLESGGDLk	(N)	k:Ubiquitination-GG	14.46	574.5	2754.53	113.942	-35.1	Q9VZL6	Ragulator complex protein LAMTOR4 homolog
1556	17K03_COLLAB-IT_CTRL_032.2577.2577.0	5	7.89	60.6	26200000	4.885	2	1	1	0	K762k	730	(K)	SMPTNCVWIDGVDEKVSESFLQSQFTRFGAVTk	(V)	C:Carbamidomethylation,k:Ubiquitination-GG	15.84	776.12	3763.81	112.761	-330.6	Q8SX83	Protein split ends
1447	17K03_COLLAB-IT_CTRL_031.1324.1330.0	5	8.03	81.1	3470000	4.884	3	2	2	0	K71k K97k	69	(K)	EGkHGFHIHEKGDLTNGCISMGAHYNPDk	(V)	C:Carbamidomethylation,k:Ubiquitination-GG	8.09	696.28	3249.49	227.876	-60.5	Q7JR71	Extracellular superoxide dismutase [Cu-Zn]
1563	17K03_COLLAB-IT_CTRL_022.2548.2548.0	4	7.87	70.3	11900000	4.875	3	2	2	0	K825k K830k	810	(R)	SSKSAAPFISNPAPAkSSPVk	(A)	k:Ubiquitination-GG	15.64	575.47	2071.12	227.74	-150.5	P15330	Embryonic polarity protein dorsal
1533	17K03_COLLAB-IT_CTRL_023.4339.4339.0	3	7.91	88.1	2990000	4.874	1	1	1	0	M341m K343k	323	(R)	RMAQDMEGLQRAEQSLQEmQk	(E)	m:Oxidized methionine,kUbiquitination-GG	26.87	879.02	2507.18	127.865	-824.4	P83094	Stromal interaction molecule homolog
1565	17K03_COLLAB-IT_CTRL_032.2768.2768.0	5	7.87	76.2	12000000	4.862	2	1	1	0	M815m K838k	809	(K)	GAYTTTmTYGGQRVPLGEKVVVEQTVDVSk	(I)	m:Oxidized methionine,kUbiquitination-GG	17.01	669.42	3213.65	129.425	-183.4	Q9VEN1	Filamin-A
1495	17K03_COLLAB-IT_CTRL_033.3692.3692.0	5	7.96	63.1	13600000	4.856	0	0	0	0	M1180m	1180	(K)	mEQVQVIMRDTQVPIDLNQPVTMADGQR	(L)	m:Oxidized methionine	22.9	646.44	3212.59	15.5848	-127	Q9VCX1	Regulator of G-protein signaling loco
1209	17K03_COLLAB-IT_CTRL_021.3705.3705.0	3	8.45	65.3	19200000	4.851	1	0	0	0	M173m	163	(K)	RNLTGISYLKmTDLMNFMTYR	(C)	m:Oxidized methionine	22.68	862.41	2568.28	16.9383	364.9	Q9VAJ3	Pickpocket protein 19
1561	17K03_COLLAB-IT_CTRL_012.3641.3641.0	4	7.87	63.6	3910000	4.847	2	1	1	0	K112k	85	(R)	SFKLDDDDDGMSGSGTAPTGTAPTGTIk	(T)	k:Ubiquitination-GG	22.79	714.82	2742.24	114.017	-9	Q9VYA7	RRP12-like protein
1540	17K03_COLLAB-IT_CTRL_022.1959.1959.0	5	7.9	61.4	5900000	4.843	3	1	1	0	M93m K100k	76	(K)	AEVLATLKQLQNEVAPImKATDILk	(N)	m:Oxidized methionine,kUbiquitination-GG	12.01	574.52	2737.55	131.018	341.6	O77410	Eukaryotic translation initiation factor 3 subunit E
1429	17K03_COLLAB-IT_CTRL_021.3043.3047.0	4	8.05	69.8	70700000	4.837	2	1	1	0	K338k M354m	328	(K)	ILRPNGSFVCkVFDLFTPFSVGLVYLmYK	(C)	C:Carbamidomethylation,k:Ubiquitination-GG,mOxidized methionine	18.51	885.41	3410.8	127.814	-628.5	Q9W4N2	Cap-specific mRNA (nucleoside-2'-O-)-methyltransferase 1
1462	17K03_COLLAB-IT_CTRL_022.2520.2524.0	4	8.01	75.8	16900000	4.83	2	0	0	0	M21m	8	(K)	SPRPLKITIVGDGmVGKTCMLITYTR	(N)	C:Carbamidomethylation,m:Oxidized methionine	15.48	731.9	2907.56	17.0165	349.3	Q24192	Ras-like GTP-binding protein RhoL
1585	17K03_COLLAB-IT_CTRL_033.3208.3208.0	3	7.82	70.5	5880000	4.816	2	1	1	0	K659k	658	(K)	SkLEQELSVVASDYEEVSK	(E)	k:Ubiquitination-GG	19.78	752.46	2140.07	115.3	557.3	P35415	Paramyosin, long form
388	17K03_COLLAB-IT_CTRL_023.2668.2668.2	2	12.09	83.1	9920000	4.807	2	1	1	0	K6k	1	(-)	MQIFVkTLTGK	(T)	k:Ubiquitination-GG	16.41	690.84	1265.73	114.944	652.7	P18101	Ubiquitin-60S ribosomal protein L40
632	17K03_COLLAB-IT_CTRL_012.2577.2577.0	5	9.92	74.5	4160000	4.806	3	2	2	0	M139m K142k M145m K162k	136	(K)	GTSmDSkTVmETKANAAAAAAISDPSk	(T)	m:Oxidized methionine,kUbiquitination-GG	15.92	583.32	2653.28	259.29	-269.7	Q9VDM6	Eukaryotic translation initiation factor 3 subunit G-B
1592	17K03_COLLAB-IT_CTRL_013.3448.3448.0	4	7.8	71.1	8770000	4.799	2	1	1	0	M59m K69k	51	(K)	ENGKYSPQmSGNVCTPPPkR	(L)	C:Carbamidomethylation,m:Oxidized methionine,kUbiquitination-GG	21.56	594.86	2247.07	129.354	-287.9	Q9VVR2	Protein aurora borealis
1578	17K03_COLLAB-IT_CTRL_033.3626.3626.0	5	7.84	77.7	9770000	4.792	3	1	1	0	K130k	128	(K)	IQkPILMCFICKLSFGNVKSFSLHANTEHR	(L)	C:Carbamidomethylation,k:Ubiquitination-GG	22.49	739.23	3575.84	116.277	605.2	P28167	Zinc finger protein 2
1551	17K03_COLLAB-IT_CTRL_012.3539.3539.0	4	7.89	83.3	8740000	4.784	2	1	1	0	K111k	104	(K)	FCSGYCFkASEYIKSQVPTSPLWLR	(D)	C:Carbamidomethylation,k:Ubiquitination-GG	22.14	785.95	3024.47	116.303	719.8	A8DYY5	Putative RNA polymerase II subunit B1 CTD phosphatase RPAP2 homolog
1628	17K03_COLLAB-IT_CTRL_031.2876.2876.0	3	7.76	84.2	38100000	4.765	0	0	0	0	M321m	315	(K)	VMQDLVmDVLR	(V)	m:Oxidized methionine	17.81	445.02	1318.69	14.3597	-1226.7	P45437	Coatomer subunit beta
1611	17K03_COLLAB-IT_CTRL_012.3100.3100.0	5	7.77	75.6	8960000	4.759	1	1	1	0	M39m K45k	6	(R)	QCIVVNMRSAIVLIMIFVLTGIRNSETASGGNQmDLSDSk	(G)	C:Carbamidomethylation,m:Oxidized methionine,kUbiquitination-GG	19.25	900.4	4368.22	129.753	-63.4	Q9U4H5	TM2 domain-containing protein almondex
1589	17K03_COLLAB-IT_CTRL_031.3084.3084.0	5	7.81	68.8	15700000	4.758	1	1	1	0	M39m K45k	6	(R)	QCIVVNMRSAIVLIMIFVLTGIRNSETASGGNQmDLSDSk	(G)	C:Carbamidomethylation,m:Oxidized methionine,kUbiquitination-GG	19.11	900.06	4368.22	128.053	-441.5	Q9U4H5	TM2 domain-containing protein almondex
1593	17K03_COLLAB-IT_CTRL_013.2743.2743.0	5	7.8	81.9	10600000	4.745	2	1	1	0	K356k	315	(K)	EVVLSAGAVNSPHILLLSGVGPKDELQQVNVRTVHNLPGVGk	(N)	k:Ubiquitination-GG	17.07	891.45	4341.4	111.817	-499.9	P18173	Glucose dehydrogenase [FAD, quinone]
1636	17K03_COLLAB-IT_CTRL_031.2714.2714.0	4	7.75	71	4440000	4.736	2	1	1	0	K523k M562m	523	(R)	kDPTSTMSALQLAAVTQPGTGGSVTGGGGAAGGGGSAAGmKR	(R)	k:Ubiquitination-GG,mOxidized methionine	16.76	962.67	3717.83	129.83	-54.1	P18490	Protein pecanex
1645	17K03_COLLAB-IT_CTRL_023.2889.2889.0	3	7.73	70	12700000	4.72	2	1	1	0	K137k	135	(R)	NGkHVVVAGCVPQGAPK	(S)	C:Carbamidomethylation,k:Ubiquitination-GG	17.74	610.96	1717.92	112.949	-597.6	Q7K4W1	Threonylcarbamoyladenosine tRNA methylthiotransferase
1399	17K03_COLLAB-IT_CTRL_032.3457.3457.0	4	8.11	71.9	8200000	4.719	2	1	1	0	K167k	137	(R)	ELALQTSQICIELAKHLDIRVMVTTGGTILk	(D)	C:Carbamidomethylation,k:Ubiquitination-GG	21.45	891.82	3451.9	112.357	-473.1	P23128	Putative ATP-dependent RNA helicase me31b
1631	17K03_COLLAB-IT_CTRL_013.2328.2328.0	4	7.75	65.7	9640000	4.716	2	1	1	0	M789m M801m K805k	789	(R)	mLSFGDEPGLGTmAETkRSK	(I)	m:Oxidized methionine,kUbiquitination-GG	14.45	576.11	2155.05	146.366	144.8	Q24472	Retinoblastoma family protein
364	17K03_COLLAB-IT_CTRL_032.2680.2680.0	4	12.53	88.6	8820000	4.703	2	1	1	0	K48k	43	(R)	LIFAGkQLEDGRTLSDYNIQK	(E)	k:Ubiquitination-GG	16.47	631.83	2409.28	115.021	387.4	P18101	Ubiquitin-60S ribosomal protein L40
1682	17K03_COLLAB-IT_CTRL_011.3933.3933.0	4	7.67	71.7	4120000	4.672	2	1	1	0	M362m K371k	348	(R)	ENKPLLRGATGAIWmCAVTDANVk	(V)	C:Carbamidomethylation,m:Oxidized methionine,kUbiquitination-GG	24.7	687.1	2615.34	130.035	-1.1	Q9VM21	Armadillo repeat-containing protein gudu
1614	17K03_COLLAB-IT_CTRL_022.3700.3700.0	4	7.77	73.8	16000000	4.669	2	1	1	0	K86k	65	(K)	KYGVDLIHFTHANNTAIHSSTkVDDTIR	(Y)	k:Ubiquitination-GG	22.76	817.21	3153.61	112.211	-561.1	Q9VLN1	WD repeat-containing protein 82
1612	17K03_COLLAB-IT_CTRL_011.4381.4381.0	3	7.77	68.7	3730000	4.662	0	0	0	0	M936m	924	(R)	SIGYMRPLSIWSmQVALERRR	(A)	m:Oxidized methionine	27.52	855.18	2549.36	14.1663	-713.3	Q7KT91	Non-lysosomal glucosylceramidase
1696	17K03_COLLAB-IT_CTRL_012.1588.1588.0	4	7.65	67.9	7520000	4.647	2	1	1	0	M1m K10k	1	(-)	mAAAPKDIEkPHVGDSASVHR	(I)	m:Oxidized methionine,kUbiquitination-GG	9.7	587.71	2216.12	131.694	705.4	P55828	40S ribosomal protein S20
791	17K03_COLLAB-IT_CTRL_032.2906.2906.0	5	9.35	64.8	15700000	4.642	3	1	1	0	K1242k	1225	(K)	DLIRKLAPTTDGSEAIAkPDDYLQPK	(A)	k:Ubiquitination-GG	17.89	594.25	2855.51	111.706	-787.6	P04412	Epidermal growth factor receptor
840	17K03_COLLAB-IT_CTRL_031.3440.3440.0	5	9.21	67.5	25100000	4.616	2	0	0	0	M1395m	1379	(R)	DTMSLHPTFVLYISGAmGYLTSETDKDNLSIREVK	(A)	m:Oxidized methionine	21.37	789.96	3931.95	13.8253	-549.9	Q9VT28	Protein furry
1737	17K03_COLLAB-IT_CTRL_013.1953.1953.0	4	7.59	66.6	4820000	4.594	2	0	0	0	M312m	303	(R)	LVAMKEHEGmEK	(V)	m:Oxidized methionine	12.06	355.05	1401.69	15.4917	-355.1	P45437	Coatomer subunit beta
1739	17K03_COLLAB-IT_CTRL_012.3064.3064.0	5	7.59	67.9	7680000	4.583	0	0	0	0	M253m	236	(R)	SGPRPGGGAGGAMNSTNmGGGGGGGGGGGPRGGEDFFITQR	(L)	m:Oxidized methionine	19	733.86	3649.64	15.6341	-98.4	Q04047	Protein no-on-transient A
1238	17K03_COLLAB-IT_CTRL_011.3344.3344.0	3	8.39	68.2	6530000	4.572	2	1	1	0	K124k	124	(K)	kHNEIITDFQEQVEILTK	(N)	k:Ubiquitination-GG	20.97	767.36	2185.15	114.915	379.4	P35415	Paramyosin, long form
1756	17K03_COLLAB-IT_CTRL_013.2473.2473.0	5	7.57	78.5	7860000	4.566	1	0	0	0	M11m	1	(-)	MYIDTSASSRmTDNKGSVITINGGESAGNSPPSQR	(K)	m:Oxidized methionine	15.35	729.83	3628.7	16.4243	117.8	Q9VVD9	Adenosine 3'-phospho 5'-phosphosulfate transporter 2
1587	17K03_COLLAB-IT_CTRL_023.3028.3028.0	4	7.81	87.7	24100000	4.556	3	1	1	0	M181m K195k	181	(R)	mVKPRIVLLIFVNGkVVFTGAK	(S)	m:Oxidized methionine,kUbiquitination-GG	18.59	640.6	2429.48	129.895	-55.7	Q27896	TBP-related factor
1295	17K03_COLLAB-IT_CTRL_023.3099.3099.0	3	8.3	66.1	11400000	4.543	3	1	1	0	M816m K836k	816	(K)	mEYKSAAKPSLYAYPAPLEEk	(K)	m:Oxidized methionine,kUbiquitination-GG	19.03	839.14	2386.2	129.206	-330.9	Q9V3P6	26S proteasome non-ATPase regulatory subunit 1
1706	17K03_COLLAB-IT_CTRL_012.3829.3829.0	5	7.63	75.3	5850000	4.54	1	0	0	0	M679m	673	(R)	CIIPNEmKQPGVVDAHLVMHQLTCNGVLEGIRICR	(K)	C:Carbamidomethylation,m:Oxidized methionine	23.98	816.05	4058.04	18.1832	536.8	P05661	Myosin heavy chain, muscle
1736	17K03_COLLAB-IT_CTRL_013.2494.2494.0	4	7.59	63	4380000	4.524	2	1	1	0	K746k	732	(K)	ETSPKTETEAELRSk	(R)	k:Ubiquitination-GG	15.49	455.59	1705.86	113.478	-310.6	O96838	Putative 1-phosphatidylinositol 3-phosphate 5-kinase
1713	17K03_COLLAB-IT_CTRL_032.2246.2246.0	4	7.63	74.1	5990000	4.52	2	1	1	0	K400k	397	(R)	HMGkNFSLSRK	(L)	k:Ubiquitination-GG	13.85	355.14	1304.69	112.849	-842.3	Q24563	Dopamine receptor 2
1701	17K03_COLLAB-IT_CTRL_021.4492.4492.0	5	7.64	73	4120000	4.515	2	1	1	0	K291k	282	(K)	EEQSALVTYkNVPEGSYTQESVGQTQGQK	(A)	k:Ubiquitination-GG	27.65	660.93	3185.52	115.098	319.5	Q9VN12	Probable sodium/potassium/calcium exchanger CG1090
1752	17K03_COLLAB-IT_CTRL_023.2854.2854.0	3	7.58	88.7	20600000	4.506	2	1	1	0	K169k	167	(K)	MFkEGRLGVPAINVNDSVTK	(S)	k:Ubiquitination-GG	17.53	763.4	2175.16	113.026	-444.3	Q27580	Adenosylhomocysteinase
1607	17K03_COLLAB-IT_CTRL_023.1975.1975.0	4	7.78	72.9	3380000	4.504	2	1	1	0	K40k	21	(R)	EETKPPQTPAEGEGDPEFIkR	(Q)	k:Ubiquitination-GG	12.08	618.03	2355.15	113.952	-36.9	P19351	Troponin T, skeletal muscle
1638	17K03_COLLAB-IT_CTRL_011.2841.2841.0	4	7.74	68.7	6700000	4.504	3	2	2	0	K262k K265k	242	(K)	THIFKPVSVQAMWSALQTLHkVSk	(K)	k:Ubiquitination-GG	17.68	741.79	2736.5	227.636	-151.6	Q6NN85	Protein phosphatase Slingshot
1732	17K03_COLLAB-IT_CTRL_021.2518.2518.0	5	7.6	67.3	27200000	4.501	3	2	2	0	K3010k K3026k	2999	(K)	QEMDFFIVSGDkQAQFQIGKSGELFIAkPLDR	(E)	k:Ubiquitination-GG	15.52	775.44	3642.86	230.308	573.8	Q9VW71	Fat-like cadherin-related tumor suppressor homolog
1793	17K03_COLLAB-IT_CTRL_011.4142.4142.0	4	7.5	100	3000000	4.5	1	0	0	0	M1408m	1404	(R)	DICVmLVAAGAHLDTLDSGGNTPMMVAFNK	(N)	C:Carbamidomethylation,m:Oxidized methionine	26.01	792.1	3148.49	16.8848	281.1	Q09103	Eye-specific diacylglycerol kinase
308	17K03_COLLAB-IT_CTRL_031.2632.2637.2	2	13.44	88.1	20100000	4.496	2	1	1	0	K6k	1	(-)	MQIFVkTLTGK	(T)	k:Ubiquitination-GG	16.26	690.35	1265.73	113.964	-57.1	P18101	Ubiquitin-60S ribosomal protein L40
1799	17K03_COLLAB-IT_CTRL_011.1790.1792.0	4	7.49	87.8	19500000	4.485	2	1	1	0	K504k	491	(R)	DKNSQWNVEDNEHk	(L)	k:Ubiquitination-GG	11.02	464.85	1742.77	113.605	-235.7	Q9W5D4	Protein O-mannosyl-transferase 2
1775	17K03_COLLAB-IT_CTRL_032.2106.2106.0	3	7.54	72	2830000	4.466	1	0	0	0	M229m	209	(R)	ESRIRANECAMLIFTSGTVGmPK	(A)	C:Carbamidomethylation,m:Oxidized methionine	12.91	861.59	2568.27	14.4823	-585.6	Q9V3U0	Long-chain-fatty-acid--CoA ligase bubblegum-like
1678	17K03_COLLAB-IT_CTRL_021.3532.3537.2	2	7.68	74.1	29600000	4.463	2	1	1	0	K318k	305	(R)	LVYRSKVAALLLEk	(H)	k:Ubiquitination-GG	21.6	859.47	1602.99	114.939	521.4	Q9VCZ3	Octopamine receptor beta-1R
1490	17K03_COLLAB-IT_CTRL_022.2182.2182.0	5	7.96	64	14500000	4.46	3	1	1	0	M350m K372k	348	(R)	DLmLAGTQQSVELKLALDQEQQKSk	(K)	m:Oxidized methionine,kUbiquitination-GG	13.42	587.41	2801.47	131.55	515.4	Q8INF0	Soluble guanylate cyclase 88E
1663	17K03_COLLAB-IT_CTRL_011.2875.2875.0	2	7.7	68.3	7830000	4.451	0	0	0	0	M787m	783	(K)	IMSWmQAWAR	(G)	m:Oxidized methionine	17.89	648.23	1279.61	15.8453	-115.5	P05661	Myosin heavy chain, muscle
108	17K03_COLLAB-IT_CTRL_023.3860.3882.3	3	17.41	92.3	43700000	4.449	2	1	1	0	K1502k	1500	(R)	ENkNLADEVKDLLDQIGEGGR	(N)	k:Ubiquitination-GG	23.86	809.8	2313.17	114.217	71.9	P05661	Myosin heavy chain, muscle
1761	17K03_COLLAB-IT_CTRL_032.2935.2935.0	3	7.57	64	18700000	4.449	2	1	1	0	K301k	300	(R)	NkVNPSFMLATITPDDYVVSK	(C)	k:Ubiquitination-GG	18.07	818.65	2339.2	114.74	284.2	Q9VLR9	Metallophosphoesterase 1 homolog
1782	17K03_COLLAB-IT_CTRL_032.2384.2384.0	4	7.53	77.9	6820000	4.448	1	0	0	0	M45m	29	(R)	SSSSCISELEMDIDEDmSAQPTITSTPKPR	(F)	C:Carbamidomethylation,m:Oxidized methionine	14.66	833.15	3312.49	17.0866	327.9	P40794	Protein bottleneck
1805	17K03_COLLAB-IT_CTRL_021.3601.3610.0	5	7.48	67.6	17700000	4.433	2	1	1	0	M415m K416k	394	(K)	DHSDVSNQLYACYAIGKDVQAmk	(A)	C:Carbamidomethylation,m:Oxidized methionine,kUbiquitination-GG	22.03	549.32	2613.21	129.364	-245.8	P31409	V-type proton ATPase subunit B
1519	17K03_COLLAB-IT_CTRL_013.1979.1979.0	4	7.92	80.7	2470000	4.424	2	1	1	0	M381m M382m K383k	362	(K)	ANRELNWTPKVTFVELVSDmmk	(A)	m:Oxidized methionine,kUbiquitination-GG	12.22	689.2	2608.33	145.452	-210.9	Q9VMW9	GDP-mannose 4,6 dehydratase
1783	17K03_COLLAB-IT_CTRL_032.3043.3043.0	4	7.53	62.5	17200000	4.423	2	1	1	0	M405m K418k	394	(K)	VYQQLTGDTSLmPRIPWKPISASSk	(S)	m:Oxidized methionine,kUbiquitination-GG	18.74	733.69	2803.48	128.257	-607.4	Q9NIV1	Eukaryotic translation initiation factor 2-alpha kinase
1734	17K03_COLLAB-IT_CTRL_013.2638.2638.0	5	7.59	62.7	7620000	4.411	3	2	2	0	K1386k K1392k	1366	(K)	CTKLQQEAENITNQLEEAELkASAAVk	(S)	C:Carbamidomethylation,k:Ubiquitination-GG	16.4	649.61	3016.53	227.495	-182	Q99323	Myosin heavy chain, non-muscle
1571	17K03_COLLAB-IT_CTRL_031.3275.3275.0	4	7.86	63.8	9900000	4.382	2	2	2	0	K1037k M1054m K1058k	1033	(R)	EDMVkGQERNLPAVPATLANImQAPk	(I)	k:Ubiquitination-GG,mOxidized methionine	20.33	766.67	2821.47	242.188	-617.7	Q6AWG9	Uncharacterized protein CG5098
1685	17K03_COLLAB-IT_CTRL_022.4227.4227.0	4	7.67	88	4940000	4.382	0	0	0	0	M552m	526	(R)	FHLELPSGTEVDMAGESGITLTPTPHmLR	(F)	m:Oxidized methionine	26.07	788.94	3136.54	16.194	63.1	Q9VWR5	Cytochrome P450 306a1
1531	17K03_COLLAB-IT_CTRL_023.2510.2510.0	5	7.91	72.4	17900000	4.377	2	1	1	0	M694m K700k	690	(K)	LLLDmYKGVSkDQR	(D)	m:Oxidized methionine,kUbiquitination-GG	15.46	360.15	1665.9	130.822	436.2	Q9VRP9	E3 ubiquitin-protein ligase Bre1
1431	17K03_COLLAB-IT_CTRL_022.2981.2981.0	5	8.05	72.7	41300000	4.356	2	0	0	0	M314m	300	(R)	VALGVTTVLTMTTLmSSTNAALPKISYVK	(S)	m:Oxidized methionine	18.21	606.3	3010.66	16.8142	270.6	P25123	Gamma-aminobutyric acid receptor subunit beta
1867	17K03_COLLAB-IT_CTRL_033.3322.3322.0	3	7.39	72	5080000	4.356	2	1	1	0	M338m K343k	324	(R)	ALAELHYKIGLTYLmQQLNk	(E)	m:Oxidized methionine,kUbiquitination-GG	20.54	826.22	2347.28	129.361	-273.2	Q9I7K6	Protein NASP homolog
1818	17K03_COLLAB-IT_CTRL_012.3883.3883.0	5	7.46	76.5	2220000	4.349	3	2	2	0	M573m K575k K590k	572	(K)	VmTkLQHPNLVQLYGVCSkHRPIYIVTEYMK	(H)	C:Carbamidomethylation,m:Oxidized methionine,kUbiquitination-GG	24.32	799.23	3745.97	246.147	517.5	P08630	Tyrosine-protein kinase Btk29A
1460	17K03_COLLAB-IT_CTRL_013.3095.3095.0	5	8.01	67.9	7680000	4.328	2	1	1	0	K271k	232	(R)	SNSKESAAMHSPSAAAAAAAAAAQIASSNRLQEAALAAAk	(E)	k:Ubiquitination-GG	19.3	776.99	3765.89	115.027	253.6	Q9VJS8	Zinc finger protein Elbow
1664	17K03_COLLAB-IT_CTRL_023.3755.3755.0	5	7.7	65.3	11300000	4.313	3	1	1	0	M70m K82k	65	(K)	SQAAGmLLAFGDTAATAkDNLETSYDTAAKSTAAPETNK	(I)	m:Oxidized methionine,kUbiquitination-GG	23.19	813.22	3931.89	130.184	36.1	Q9W4S1	Glutaredoxin domain-containing cysteine-rich protein CG12206
1933	17K03_COLLAB-IT_CTRL_033.2642.2642.0	3	7.31	69.5	11300000	4.311	3	1	1	0	K873k	857	(K)	IIKSSSANEEDPCKGEk	(R)	C:Carbamidomethylation,k:Ubiquitination-GG	16.25	669.26	1891.91	113.859	-91.8	Q9W5U2	Probable chitinase 10
1830	17K03_COLLAB-IT_CTRL_033.1648.1669.0	5	7.44	68	8910000	4.307	2	1	1	0	K368k	354	(R)	KPGIFLGWADLLNSkDIR	(N)	k:Ubiquitination-GG	9.95	432.24	2043.14	114.032	-4.9	Q9VVT2	Protein I'm not dead yet
1263	17K03_COLLAB-IT_CTRL_011.2041.2041.0	5	8.35	70.2	4590000	4.289	2	0	0	0	M293m	274	(K)	HLVSHSSNMVLALQSKLASmSTDFKQILEVR	(T)	m:Oxidized methionine	12.6	698.23	3469.83	17.2915	371.8	Q24509	Syntaxin-5
1797	17K03_COLLAB-IT_CTRL_023.3253.3253.0	5	7.5	100	10700000	4.27	1	0	0	0	M943m M945m	937	(K)	TLMSATmAmAPTDVVAAQGPDPAVAKAAARLAEHHR	(R)	m:Oxidized methionine	19.97	738.57	3656.85	31.9751	-4	Q9VW51	RNA polymerase II elongation factor Ell
1813	17K03_COLLAB-IT_CTRL_013.4441.4441.0	4	7.47	86.7	2690000	4.259	3	1	1	0	K261k	244	(K)	EELVQWAQMDYYDEHIMkIQLPYNAVTATNAMLTAEQKQEK	(R)	k:Ubiquitination-GG	27.82	1246.48	4871.34	111.562	-498	Q9VEC3	Actin-related protein 5
1283	17K03_COLLAB-IT_CTRL_031.3024.3024.0	5	8.32	63.7	7610000	4.258	2	1	1	0	M55m K92k	55	(R)	mASVDVGSNNQVTVTVPNSESSGVPHTVYKGNQREYAk	(E)	m:Oxidized methionine,kUbiquitination-GG	18.73	837.01	4049.96	131.059	244.2	Q7JRJ1	Ell-associated factor Eaf
1889	17K03_COLLAB-IT_CTRL_022.3552.3552.0	3	7.36	72.4	19300000	4.254	2	1	1	0	M5088m M5093m K5103k	5080	(K)	DTDSKNVNmTQLAmDRYAYYVCFk	(C)	C:Carbamidomethylation,m:Oxidized methionine,kUbiquitination-GG	21.79	1027.22	2933.33	146.319	92.9	Q9NB71	E3 ubiquitin-protein ligase highwire
1774	17K03_COLLAB-IT_CTRL_021.2924.2924.0	5	7.54	66.8	29500000	4.242	2	1	1	0	K399k M401m	387	(K)	ERLDQNNLEEIVkAmTKPDSGLEIR	(D)	k:Ubiquitination-GG,mOxidized methionine	17.79	606.1	2898.5	127.972	-682.6	P51140	Segment polarity protein dishevelled
1958	17K03_COLLAB-IT_CTRL_012.2933.2933.0	4	7.27	62.8	5240000	4.239	1	0	0	0	M69m	69	(R)	mCQEALQDLKMAIR	(A)	C:Carbamidomethylation,m:Oxidized methionine	18.17	430.96	1706.84	13.9795	-1171.2	P98081	Protein disabled
1966	17K03_COLLAB-IT_CTRL_012.2846.2846.0	4	7.26	75.5	7670000	4.238	2	1	1	0	K137k	112	(R)	VHLLHGQSLADSSASGSMEQLKLAEkNFLR	(S)	k:Ubiquitination-GG	17.62	845.85	3266.7	113.683	-106.4	Q9VSA4	Tonsoku-like protein
1922	17K03_COLLAB-IT_CTRL_022.4800.4811.0	4	7.32	68.2	6420000	4.234	3	1	1	0	K1579k	1554	(R)	IQSVLAMGGNLIDKKQCSGSEDAVQk	(R)	C:Carbamidomethylation,k:Ubiquitination-GG	29.67	723.03	2776.4	112.701	-464.3	P13395	Spectrin alpha chain
1765	17K03_COLLAB-IT_CTRL_023.2559.2559.0	5	7.56	64.8	8090000	4.23	1	0	0	0	M30m	18	(R)	SCLLLSMGGKNImLDCGMHMGYNDER	(R)	C:Carbamidomethylation,m:Oxidized methionine	15.75	604.35	3002.31	15.4089	-194.2	Q9VAH9	Integrator complex subunit 11
1994	17K03_COLLAB-IT_CTRL_013.1787.1789.0	4	7.23	75.3	7160000	4.227	3	0	0	0	M855m	842	(R)	KDCISGPPIEMLQmGIGGGSGGSTKNEK	(S)	C:Carbamidomethylation,m:Oxidized methionine	11.03	717.34	2848.36	17.9744	690.6	P14083	Protein jim lovell
2004	17K03_COLLAB-IT_CTRL_032.3300.3300.0	5	7.23	68.9	5340000	4.223	1	1	1	0	M162m K164k	131	(R)	IMSELNSSLAGIPTLIAQLQNSSQVLNSLEEmGk	(Q)	m:Oxidized methionine,kUbiquitination-GG	20.44	749.66	3615.86	128.41	-434.7	Q9VVT5	Dysbindin protein homolog
54	17K03_COLLAB-IT_CTRL_021.3247.3247.0	3	18.73	95.4	52500000	4.222	2	1	1	0	K92k	86	(R)	ICLDVLkDKWSPALQIR	(T)	C:Carbamidomethylation,k:Ubiquitination-GG	19.78	724.36	2055.14	115.924	866.2	P35128	Ubiquitin-conjugating enzyme E2 N
2015	17K03_COLLAB-IT_CTRL_033.2071.2071.0	5	7.22	75.3	4090000	4.215	2	1	1	0	K783k	765	(K)	FDVVDTLEFNVTGLQPDTkYSIQVAALTRK	(G)	k:Ubiquitination-GG	12.6	697.55	3368.77	114.947	259.6	P16621	Tyrosine-protein phosphatase Lar
1936	17K03_COLLAB-IT_CTRL_032.3958.3958.0	5	7.31	79.3	7640000	4.213	2	2	2	0	K61k M62m K89k	57	(K)	TEAIkmQLPWLERLDMINTLAPLAPELAVQLEk	(H)	k:Ubiquitination-GG,mOxidized methionine	24.62	805.07	3775.05	246.267	543.7	Q9V9Z9	Probable rRNA-processing protein EBP2 homolog
1956	17K03_COLLAB-IT_CTRL_032.1859.1859.0	5	7.28	78.6	2820000	4.208	2	1	1	0	M237m K250k	229	(R)	KTVTPITVmDGRTTTGFGNENk	(F)	m:Oxidized methionine,kUbiquitination-GG	11.36	500.27	2367.2	130.124	34.3	Q9VKA5	Gustatory and pheromone receptor 33a
2029	17K03_COLLAB-IT_CTRL_013.3014.3014.0	5	7.2	75.8	10000000	4.194	2	1	1	0	M228m K236k	215	(K)	EDVCFVAEDFKQAmQVHYSEEkR	(R)	C:Carbamidomethylation,m:Oxidized methionine,kUbiquitination-GG	18.78	596.15	2845.29	131.429	467.3	P45890	Actin-related protein 6
1953	17K03_COLLAB-IT_CTRL_022.2901.2901.0	5	7.28	77.6	40100000	4.191	2	1	1	0	K803k	790	(R)	MVELSTNDICPAEkGVFIALAVVIALTGLLAGFTAALYYK	(F)	C:Carbamidomethylation,k:Ubiquitination-GG	17.73	872.55	4243.28	115.441	320.8	P08953	Protein toll
1842	17K03_COLLAB-IT_CTRL_011.1619.1619.0	5	7.42	68.5	2600000	4.189	3	1	1	0	M385m K397k	375	(R)	LNKMPKPPEGmSQADWLAELQGkR	(E)	m:Oxidized methionine,kUbiquitination-GG	9.95	571.28	2724.4	127.975	-723.2	Q9VEC3	Actin-related protein 5
2041	17K03_COLLAB-IT_CTRL_021.2561.2561.0	5	7.19	66.7	26800000	4.185	2	1	1	0	K91k M111m	90	(K)	GkTDEGVNDPFTDADGRSHCVmK	(Q)	C:Carbamidomethylation,k:Ubiquitination-GG,mOxidized methionine	15.76	533.86	2536.12	129.152	-332.4	Q9VYF2	Putative inositol monophosphatase 3
1899	17K03_COLLAB-IT_CTRL_032.2074.2074.0	4	7.35	78.1	3320000	4.182	3	2	2	0	K381k K396k	379	(R)	SAkNPFITVIVLSYTSGkCVYLIYLSWK	(T)	C:Carbamidomethylation,k:Ubiquitination-GG	12.71	870.79	3250.76	229.38	371.8	Q9VSH2	Gustatory receptor for bitter taste 66a
2027	17K03_COLLAB-IT_CTRL_032.1636.1643.0	4	7.21	63	8830000	4.18	2	1	1	0	K606k	593	(R)	KPSPQLDEDEPQVk	(N)	k:Ubiquitination-GG	9.94	432.26	1609.81	116.211	1256.3	P39770	Homeotic protein spalt-major
2005	17K03_COLLAB-IT_CTRL_032.4811.4811.0	4	7.23	74.7	8090000	4.167	3	1	1	0	K1579k	1554	(R)	IQSVLAMGGNLIDKKQCSGSEDAVQk	(R)	C:Carbamidomethylation,k:Ubiquitination-GG	29.99	723.46	2776.4	114.421	130.9	P13395	Spectrin alpha chain
2036	17K03_COLLAB-IT_CTRL_021.3100.3100.0	5	7.2	73.1	23900000	4.164	0	0	0	0	M253m	236	(R)	SGPRPGGGAGGAMNSTNmGGGGGGGGGGGPRGGEDFFITQR	(L)	m:Oxidized methionine	18.84	733.91	3649.64	15.8841	-30.2	Q04047	Protein no-on-transient A
1386	17K03_COLLAB-IT_CTRL_023.2152.2152.0	5	8.14	63.1	2980000	4.157	2	1	1	0	M29m K30k	29	(K)	mkVGINSPVYFDLRVIVSYPDVMQTVSDLLVEHIK	(D)	m:Oxidized methionine,kUbiquitination-GG	13.19	827.4	4005.12	127.848	-529.8	Q01637	Uridine 5'-monophosphate synthase
1446	17K03_COLLAB-IT_CTRL_023.1969.1969.0	5	8.03	65.5	3400000	4.155	2	1	1	0	K779k	750	(K)	SSIRVSNKNNAASGSGGGGAGGGAGGGGGk	(S)	k:Ubiquitination-GG	12.04	513.28	2446.18	116.193	839.1	Q09103	Eye-specific diacylglycerol kinase
2055	17K03_COLLAB-IT_CTRL_012.2281.2281.0	4	7.17	69.5	6820000	4.151	3	1	1	0	K1060k	1041	(K)	ATTKTTTTSTATTTTNNNIkSGNAAYSK	(T)	k:Ubiquitination-GG	14.08	741.93	2849.41	115.286	419.2	Q9VAW5	La-related protein 1
1980	17K03_COLLAB-IT_CTRL_023.1630.1643.0	4	7.25	62.3	12400000	4.149	2	1	1	0	K606k	593	(R)	KPSPQLDEDEPQVk	(N)	k:Ubiquitination-GG	9.92	432.25	1609.81	116.171	1233.2	P39770	Homeotic protein spalt-major
2048	17K03_COLLAB-IT_CTRL_022.2327.2327.0	4	7.18	63.6	7130000	4.149	2	1	1	0	K129k	126	(R)	ALFkGLGPNLVGVAPSRAIYFCTYSQTK	(N)	C:Carbamidomethylation,k:Ubiquitination-GG	14.35	793.96	3058.62	114.2	49.5	Q9VQ37	Mitochondrial carrier protein Rim2
2076	17K03_COLLAB-IT_CTRL_012.3787.3787.0	5	7.15	74.2	5430000	4.149	2	0	0	0	M113m	101	(K)	GAIRFVLSGANVmCPGLTSPGACMTPADKDTVVAIMAEGK	(E)	C:Carbamidomethylation,m:Oxidized methionine	23.71	823.08	4093.01	18.3661	576.8	Q9W445	Malignant T-cell-amplified sequence 1 homolog
2078	17K03_COLLAB-IT_CTRL_012.1904.1904.0	5	7.15	78.3	5540000	4.147	2	0	0	0	M1268m	1258	(K)	LNLKYFGDKDmHVALSYHLMAR	(T)	m:Oxidized methionine	11.67	528.18	2622.33	14.5389	-552.2	A1ZAB5	Protein clueless
1931	17K03_COLLAB-IT_CTRL_021.3765.3765.0	3	7.31	74.3	15700000	4.132	2	1	1	0	K240k	239	(K)	RkCMSIAQLVEFLNK	(T)	C:Carbamidomethylation,k:Ubiquitination-GG	23.06	650.97	1836.98	113.913	-66.5	P25455	1-phosphatidylinositol 4,5-bisphosphate phosphodiesterase classes I and II
2094	17K03_COLLAB-IT_CTRL_021.4377.4377.0	5	7.13	82.6	5020000	4.12	3	2	2	0	K823k K832k	814	(K)	EQELQQLQSkSAESESALkVVQVQLEQLQQQAAASGEEGSK	(T)	k:Ubiquitination-GG	26.92	934.53	4441.23	227.388	-149.5	Q9VJE5	Restin homolog
2101	17K03_COLLAB-IT_CTRL_012.3119.3119.0	4	7.12	80.1	9000000	4.117	1	0	0	0	M1131m	1131	(R)	mPVNFGSNFNPNIQVKASTPNTIQYMPVR	(A)	m:Oxidized methionine	19.37	820.33	3264.63	13.6689	-709.5	Q961D9	Protein BCL9 homolog
1988	17K03_COLLAB-IT_CTRL_021.3373.3373.0	5	7.24	65.8	24900000	4.113	3	1	1	0	M341m K350k	336	(K)	DPCSTmVLEQFDAYkIANDMDVETLQNHYKK	(V)	C:Carbamidomethylation,m:Oxidized methionine,kUbiquitination-GG	20.61	767.7	3703.71	130.763	189.2	A8DYY6	Schwannomin-interacting protein 1 homolog
1998	17K03_COLLAB-IT_CTRL_022.4139.4139.0	4	7.23	74.4	7010000	4.113	2	1	1	0	K44k M63m M74m	42	(R)	LPkSVEHFQGPAPYVIIHHSYmPAVCYSTPDCmK	(S)	C:Carbamidomethylation,k:Ubiquitination-GG,mOxidized methionine	25.52	1027.57	3959.87	147.384	329	Q8INK6	Peptidoglycan-recognition protein LB
2129	17K03_COLLAB-IT_CTRL_031.4341.4341.0	5	7.09	80.4	1610000	4.081	4	2	2	0	K10k K35k	1	(-)	MAEPLAVETkPLSNGNANGNAVGIAESASAVFQEkLKLQQQEESNEIAAVPK	(Y)	k:Ubiquitination-GG	27.06	1130.9	5420.76	229.707	286.8	Q7KT91	Non-lysosomal glucosylceramidase
2135	17K03_COLLAB-IT_CTRL_031.2424.2424.0	4	7.08	63.1	5370000	4.081	2	1	1	0	M2063m K2086k	2057	(K)	DHGSPAmTGTSTLTVIIGDVNDNKMQPGSk	(D)	m:Oxidized methionine,kUbiquitination-GG	14.98	801.28	3071.48	130.621	182.1	O15943	Neural-cadherin
975	17K03_COLLAB-IT_CTRL_011.3065.3065.0	3	8.92	85.6	4580000	4.077	2	1	1	0	K54k	48	(K)	ENLDDLkQELDIDFHK	(I)	k:Ubiquitination-GG	19.09	696.42	1971.97	115.28	592.5	P13607	Sodium/potassium-transporting ATPase subunit alpha
1432	17K03_COLLAB-IT_CTRL_032.3492.3492.0	2	8.05	69.1	18000000	4.074	2	1	1	0	K318k	305	(R)	LVYRSKVAALLLEk	(H)	k:Ubiquitination-GG	21.67	859.45	1602.99	114.899	498.1	Q9VCZ3	Octopamine receptor beta-1R
2139	17K03_COLLAB-IT_CTRL_012.3778.3778.0	4	7.07	75.3	4850000	4.067	2	0	0	0	M64m M66m	45	(K)	YIKPADRILMLGCGNSKLSmDmYDTGFR	(D)	C:Carbamidomethylation,m:Oxidized methionine	23.65	821.97	3252.57	32.2909	91.7	Q9VIK9	Methyltransferase-like protein 13
1168	17K03_COLLAB-IT_CTRL_011.4396.4409.0	4	8.51	68.6	3780000	4.065	3	2	2	0	K813k K822k	780	(R)	LVSYNQVEKDLIPPEIMSYCATSDVGAVGSCEDkMMVTESGLk	(L)	C:Carbamidomethylation,k:Ubiquitination-GG	27.61	1246.16	4751.23	230.391	462.8	Q6J5K9	Probable RNA helicase armi
1796	17K03_COLLAB-IT_CTRL_011.1669.1669.0	4	7.5	100	8010000	4.062	2	1	1	0	K480k	475	(K)	TGLTVkTLLNTVGIHPTTAEEFTRLSITK	(R)	k:Ubiquitination-GG	10.27	815.18	3141.75	115.946	584.3	Q9VNT5	Thioredoxin reductase 2, mitochondrial
1831	17K03_COLLAB-IT_CTRL_032.1968.1968.0	5	7.44	67.3	4530000	4.056	2	1	1	0	K282k M287m	260	(R)	LGTTLSREEPAAYSAESNPACSkLPQImSPLK	(E)	C:Carbamidomethylation,k:Ubiquitination-GG,mOxidized methionine	12.05	716.38	3446.73	131.142	308.5	Q27934	Protein phyllopod
1870	17K03_COLLAB-IT_CTRL_022.3740.3740.0	5	7.38	62	13800000	4.054	2	0	0	0	M733m	714	(K)	AEIGIAMGSGTAVAKSAAEmVLADDNFSSIVSAVEEGRAIYNNMK	(Q)	m:Oxidized methionine	23.01	921.46	4588.24	15.0341	-208.7	P22700	Calcium-transporting ATPase sarcoplasmic/endoplasmic reticulum type
2168	17K03_COLLAB-IT_CTRL_023.3334.3334.0	4	7.04	84.1	14500000	4.036	3	1	1	0	M559m K566k	530	(K)	APESSGLVSVLVAGAPNSGKTALAAQLAKmSDFPFVk	(V)	m:Oxidized methionine,kUbiquitination-GG	20.52	947.62	3658.95	128.507	-404.2	P46461	Vesicle-fusing ATPase 1
2053	17K03_COLLAB-IT_CTRL_032.2541.2541.0	4	7.18	71.7	7430000	4.034	2	1	1	0	M214m K224k	194	(R)	LKCLLGALAALLAGGFLAWFmTRDTDDSEAk	(K)	C:Carbamidomethylation,m:Oxidized methionine,kUbiquitination-GG	15.62	871.55	3354.72	128.456	-454.2	Q9VQ79	Putative apoptosis-inducing factor 1, mitochondrial
1510	17K03_COLLAB-IT_CTRL_021.2918.2918.0	4	7.93	67.6	12300000	4.032	2	1	1	0	M459m K460k	439	(K)	EASPGQQVEPQPKDETVDVEmk	(M)	m:Oxidized methionine,kUbiquitination-GG	17.75	643.91	2441.15	131.468	556	Q02308	Protein hairless
2092	17K03_COLLAB-IT_CTRL_013.3721.3721.0	5	7.13	69.3	4370000	4.023	1	1	1	0	K941k M944m	915	(R)	RPYSLAMVHHDLFWNELGTPRIYWTHkSNmGPR	(K)	k:Ubiquitination-GG,mOxidized methionine	23.29	828.84	4009.99	130.185	35.7	P98163	Putative vitellogenin receptor
2177	17K03_COLLAB-IT_CTRL_031.3527.3527.0	4	7.03	67.3	7220000	4.023	3	2	2	0	K40k K42k	40	(K)	kAkTAISEDIMYNYLMQFDYLPK	(S)	k:Ubiquitination-GG	21.92	752.78	2782.38	225.715	-788.1	Q8MPP3	Matrix metalloproteinase-2
2181	17K03_COLLAB-IT_CTRL_021.3108.3108.0	5	7.02	92.8	13400000	4.019	3	2	2	0	K364k M366m K370k	334	(R)	QAHIGIKGLVTDASGFPIADANVYVAGLEEkPmRTSk	(R)	k:Ubiquitination-GG,mOxidized methionine	18.89	826	3884.04	241.933	-520.4	P42787	Carboxypeptidase D
1514	17K03_COLLAB-IT_CTRL_022.1574.1597.0	3	7.93	87.8	6290000	4.018	2	0	0	0	M17m	12	(K)	YMDKRmMLK	(L)	m:Oxidized methionine	9.59	410.55	1215.61	14.0308	-1597.3	Q9VXE0	Probable small nuclear ribonucleoprotein G
2114	17K03_COLLAB-IT_CTRL_031.1790.1790.0	4	7.11	64.8	13000000	4.011	1	1	1	0	K281k M299m M303m	281	(R)	kVDQLTQEMSIHNFTVSAmHGDmEQRDR	(E)	k:Ubiquitination-GG,mOxidized methionine	11	862.66	3303.53	144.088	-564.1	Q02748	Eukaryotic initiation factor 4A
2146	17K03_COLLAB-IT_CTRL_011.2114.2114.0	5	7.06	74.5	6410000	4.008	3	2	2	0	K267k K276k	261	(R)	SLSANSkSELIHNEEkDPGTDMDMSGIYSSK	(A)	k:Ubiquitination-GG	13.06	720.67	3370.54	228.78	192.7	Q9VNB5	Odorant receptor coreceptor
2155	17K03_COLLAB-IT_CTRL_012.1859.1862.0	4	7.05	62.4	3260000	4.008	3	2	2	0	M617m K635k M645m K646k	603	(R)	SHVAPCIKVPTNANmIQAESAGGGGGGGTGDYkDGGGSQVEEmk	(K)	C:Carbamidomethylation,m:Oxidized methionine,kUbiquitination-GG	11.39	1145.07	4318.98	258.282	-391.9	Q24568	Netrin-B
2198	17K03_COLLAB-IT_CTRL_033.2581.2581.0	2	7.01	70.6	13200000	4.006	2	1	1	0	K140k	137	(K)	KQEkTAR	(T)	k:Ubiquitination-GG	15.87	488.77	860.495	116.038	2042.9	P29746	Protein bangles and beads
2054	17K03_COLLAB-IT_CTRL_031.3096.3096.0	4	7.18	78.9	5220000	4.005	1	0	0	0	M12m M17m	1	(-)	MVSEENWNSDTmSDSDmIDSKNDVCGGASSSSGSSISPR	(T)	C:Carbamidomethylation,m:Oxidized methionine	19.18	1039.93	4126.69	30.0129	-475.6	P23023	Protein doublesex
2199	17K03_COLLAB-IT_CTRL_032.4502.4502.0	4	7.01	74.9	2750000	4	2	1	1	0	M1m K3k	1	(-)	mLkTLVQLFLVVAGFAPGFGYDK	(Y)	m:Oxidized methionine,kUbiquitination-GG	28.04	661.91	2514.38	130.235	74.7	Q59DY6	C-type lectin 37Da
1916	17K03_COLLAB-IT_CTRL_032.3922.3922.0	4	7.33	86.4	2530000	3.987	2	1	1	0	M724m K737k	719	(K)	SPLVRmGKNHILNEEQDAk	(R)	m:Oxidized methionine,kUbiquitination-GG	24.39	578.52	2179.13	131.929	818.5	P18106	Tyrosine-protein kinase Fer
2098	17K03_COLLAB-IT_CTRL_032.3941.3941.0	4	7.13	68.2	10600000	3.978	2	1	1	0	K125k	110	(K)	VYIYPLQEFVDEQSDkTATTLSSEYFQILEAVLKSR	(Y)	k:Ubiquitination-GG	24.51	1082.48	4211.14	115.755	395.6	Q9Y169	Exostosin-2
1502	17K03_COLLAB-IT_CTRL_011.3493.3493.0	5	7.94	73.4	7560000	3.965	2	0	0	0	M418m	415	(K)	NFTmSAILSDGVKPTLAELERFEESPEEVNLEIMGTVK	(D)	m:Oxidized methionine	21.91	848.74	4224.11	15.5618	-102.1	Q9V460	Transcription elongation factor SPT5
1721	17K03_COLLAB-IT_CTRL_031.2564.2564.0	5	7.62	67.3	6340000	3.965	3	1	1	0	K360k	325	(K)	VLEDKDLEVIGSPIIKYGDTTVIVQHCETSLWLSYk	(S)	C:Carbamidomethylation,k:Ubiquitination-GG	15.83	853.75	4149.15	115.575	359.1	Q24498	Ryanodine receptor
2203	17K03_COLLAB-IT_CTRL_031.3870.3870.0	5	7.01	64.4	11400000	3.956	1	0	0	0	M257m	228	(R)	VHRMFAWLVAIALIYLVFFNTATIYLGYTmFIQK	(H)	m:Oxidized methionine	24.09	815.18	4054.19	17.6819	414.3	Q9VYZ2	Putative gustatory receptor 10b
2175	17K03_COLLAB-IT_CTRL_021.3245.3245.0	4	7.03	66.1	185000000	3.954	2	1	1	0	K1075k M1096m	1068	(R)	SAGVVSMkDVDSHSISLDVMPLSTGFLPmPSIRLSK	(Y)	k:Ubiquitination-GG,mOxidized methionine	19.75	983.22	3801.96	127.899	-544.2	Q9VFB7	Trafficking protein particle complex subunit 10
2188	17K03_COLLAB-IT_CTRL_012.4410.4410.0	4	7.01	67.2	7200000	3.932	3	1	1	0	K1498k M1514m	1493	(K)	HSYVSkIGVFSCGPRPLTKSVmSACDEVNK	(T)	C:Carbamidomethylation,k:Ubiquitination-GG,mOxidized methionine	27.64	871.41	3353.64	128.974	-305.4	Q9VQH2	Dual oxidase
1617	17K03_COLLAB-IT_CTRL_033.3066.3066.2	2	7.77	62.1	5560000	3.927	0	0	0	0	M784m	783	(K)	ImSWMQAWAR	(G)	m:Oxidized methionine	18.86	648.85	1279.61	17.0853	840.9	P05661	Myosin heavy chain, muscle
2122	17K03_COLLAB-IT_CTRL_021.3910.3910.0	5	7.1	70.8	7460000	3.926	4	2	2	0	K262k K272k	255	(R)	VLDTCVIkLEGGTDEDLkVLDEKPK	(D)	C:Carbamidomethylation,k:Ubiquitination-GG	23.98	609.59	2814.48	229.44	445	Q9V9K7	Serrate RNA effector molecule homolog
1876	17K03_COLLAB-IT_CTRL_032.3020.3020.0	4	7.38	68.5	11600000	3.922	2	1	1	0	M198m K220k	193	(R)	NSPYPmLPVQEVLSIIFNTVQKTANLNk	(I)	m:Oxidized methionine,kUbiquitination-GG	18.59	823.15	3158.69	130.886	257.9	P39205	Molybdenum cofactor synthesis protein cinnamon
1907	17K03_COLLAB-IT_CTRL_021.3706.3706.0	4	7.33	100	12000000	3.909	2	1	1	0	M17m M28m K36k	7	(K)	ASLCPRLVDYmAIVGAHTTPPmPKGLQGLk	(A)	C:Carbamidomethylation,m:Oxidized methionine,kUbiquitination-GG	22.68	842.1	3221.7	143.679	-699.5	Q9VXY2	MAP kinase-activating death domain protein
2002	17K03_COLLAB-IT_CTRL_022.4155.4155.0	3	7.23	69	7200000	3.908	0	0	0	0	M528m	518	(R)	YCTVRTMSDGmVVLIGGQSRR	(G)	C:Carbamidomethylation,m:Oxidized methionine	25.62	800.7	2386.18	13.9066	-870.1	P83102	Putative dual specificity tyrosine-phosphorylation-regulated kinase 3 homolog
1026	17K03_COLLAB-IT_CTRL_023.1866.1869.3	3	8.81	69.9	5970000	3.886	2	0	0	0	M33m M34m M37m M40m	30	(K)	DIKmmGImHRmENVEMMK	(K)	m:Oxidized methionine	11.4	763.33	2224.02	63.9517	-12.2	P54398	Fat body protein 2
2133	17K03_COLLAB-IT_CTRL_021.3545.3545.0	4	7.08	80.4	21100000	3.86	3	2	2	0	K464k K469k	451	(K)	APEKSSEVLSPQVkPHQSkEVAEEQSDR	(A)	k:Ubiquitination-GG	21.68	837.07	3119.56	225.698	-713.9	E1JH25	Protein telomere ends associated
1996	17K03_COLLAB-IT_CTRL_013.1738.1738.0	4	7.23	70.6	7420000	3.854	2	1	1	0	M3584m K3586k	3578	(R)	VCSFVDmGkSLFSNANELRLQMK	(T)	C:Carbamidomethylation,m:Oxidized methionine,kUbiquitination-GG	10.71	701.61	2674.32	129.103	-333.4	Q9W332	Cubilin homolog
1669	17K03_COLLAB-IT_CTRL_021.3336.3336.0	3	7.69	75.3	55000000	3.832	1	1	1	0	M678m K698k	670	(K)	GDLVGIVEmITETSRTTTVMAVRDSELAk	(L)	m:Oxidized methionine,kUbiquitination-GG	20.37	1084.55	3122.61	129.028	-310.5	Q9U969	Neuropathy target esterase sws
2143	17K03_COLLAB-IT_CTRL_033.2972.2972.0	5	7.07	61.1	7110000	3.809	3	2	2	0	M485m K489k K512k	478	(K)	NAGVDGAmVVAkVENQAGDYGYDALKGEYGNLIEk	(G)	m:Oxidized methionine,kUbiquitination-GG	18.26	781.05	3658.77	242.452	-417.6	O02649	60 kDa heat shock protein, mitochondrial
153	17K03_COLLAB-IT_CTRL_011.2647.2651.2	2	16.36	91.2	10800000	3.805	2	1	1	0	K962k	952	(K)	DIEDLELNVQkAEQDK	(A)	k:Ubiquitination-GG	16.44	1000.93	1886.93	113.918	-62.2	P05661	Myosin heavy chain, muscle
2019	17K03_COLLAB-IT_CTRL_011.2847.2847.0	4	7.21	83.9	9510000	3.775	3	1	1	0	K258k	250	(K)	NKNVPILLkLSPDLSLDDMK	(D)	k:Ubiquitination-GG	17.72	592.34	2253.25	113.086	-404.4	P32748	Dihydroorotate dehydrogenase (quinone), mitochondrial
1969	17K03_COLLAB-IT_CTRL_021.2120.2120.0	3	7.26	77.4	6820000	3.761	2	1	1	0	K817k	808	(K)	TSQLCVSAPkPIDVLLRK	(Q)	C:Carbamidomethylation,k:Ubiquitination-GG	13.15	713.82	2025.15	114.293	116.9	O61307	Teneurin-m
1974	17K03_COLLAB-IT_CTRL_012.1590.1590.0	4	7.25	61.4	10200000	3.755	3	1	1	0	K3248k	3236	(R)	ESVAESVKPESSkDATSAPPSK	(E)	k:Ubiquitination-GG	9.71	587.63	2231.1	116.394	1001.7	Q9W596	Microtubule-associated protein futsch
2132	17K03_COLLAB-IT_CTRL_011.2365.2365.0	5	7.08	67.1	9840000	3.717	3	1	1	0	M296m M303m M306m M310m K322k	288	(K)	GVSSTGSSmITSSSQmSAmNGQmLKLADLKLDDLk	(S)	m:Oxidized methionine,kUbiquitination-GG	14.66	762.62	3631.77	177.302	-189.1	Q6IDD9	Sterile alpha and TIR motif-containing protein 1
2030	17K03_COLLAB-IT_CTRL_011.3032.3032.0	4	7.2	69	3360000	3.705	1	1	1	0	M274m K286k	266	(K)	EQSIVRPDmIHLLMEAQRQFk	(A)	m:Oxidized methionine,kUbiquitination-GG	18.87	675.93	2569.34	131.36	489.7	Q9W130	Cytochrome P450 9c1
1536	17K03_COLLAB-IT_CTRL_031.3161.3161.0	5	7.91	69.6	14500000	3.661	1	1	1	0	M124m K149k	114	(K)	LLCETVRGECmENAPPELMELWPSFLNCDGLPQPEk	(H)	C:Carbamidomethylation,m:Oxidized methionine,kUbiquitination-GG	19.59	878.32	4259.96	127.613	-552.7	O77438	Frizzled-3
2060	17K03_COLLAB-IT_CTRL_021.5824.5846.0	5	7.17	61.1	5760000	3.637	1	0	0	0	M242m	219	(R)	KHVTLMGGMGSGPGSQQVGPNVHmSPAVAGLHRS	(-)	m:Oxidized methionine	36.04	680.81	3381.67	18.3484	692.2	P91641	Mediator of RNA polymerase II transcription subunit 20
1128	17K03_COLLAB-IT_CTRL_021.5860.5860.0	5	8.59	82.4	3050000	3.629	2	2	2	0	M1660m M1667m K1674k K1681k	1658	(K)	LImNQVATNmQGNYTCkIMNDYGk	(L)	C:Carbamidomethylation,m:Oxidized methionine,kUbiquitination-GG	36.27	614.38	2807.3	260.573	162	A8DYP0	Obscurin
1828	17K03_COLLAB-IT_CTRL_021.3189.3189.0	5	7.44	66.8	43900000	3.592	1	1	1	0	M734m K748k M752m M757m	730	(K)	GHLDmVRFLLQAGADQEHkTDEmHTALmEASMDGHVEVAR	(L)	m:Oxidized methionine,kUbiquitination-GG	19.4	928.48	4476.1	162.276	53.5	Q9VCA8	Ankyrin repeat and KH domain-containing protein mask
1381	17K03_COLLAB-IT_CTRL_032.3660.3660.0	3	8.15	73.7	21800000	3.553	1	0	0	0	M173m	163	(K)	RNLTGISYLKmTDLMNFMTYR	(C)	m:Oxidized methionine	22.74	862.19	2568.28	16.2783	109.7	Q9VAJ3	Pickpocket protein 19
326	17K03_COLLAB-IT_CTRL_013.2616.2621.2	2	13.03	83.1	10200000	3.5	2	1	1	0	K6k	1	(-)	MQIFVkTLTGK	(T)	k:Ubiquitination-GG	16.26	690.38	1265.73	114.024	-13.6	P18101	Ubiquitin-60S ribosomal protein L40
1131	17K03_COLLAB-IT_CTRL_021.3030.3030.0	5	8.58	65.4	30100000	3.447	3	2	2	0	K3054k K3061k	3039	(K)	SLFGHTVGGAAGAVSkITGAMGkGLAALTFDEDYQK	(K)	k:Ubiquitination-GG	18.43	760.31	3568.81	228.71	164.5	A1Z713	Vacuolar protein sorting-associated protein 13
1476	17K03_COLLAB-IT_CTRL_021.2665.2665.0	5	7.99	61.8	23500000	3.44	3	2	2	0	K8k K16k	3	(R)	TVLLSkHDELYLEkCAQENQFSYGIIVGHQADLTK	(S)	C:Carbamidomethylation,k:Ubiquitination-GG	16.34	855.85	4048.05	227.173	-213.7	Q9VTX8	Protein odr-4 homolog
171	17K03_COLLAB-IT_CTRL_013.3831.3831.0	3	15.88	91.5	50800000	3.397	2	1	1	0	K1502k	1500	(R)	ENkNLADEVKDLLDQIGEGGR	(N)	k:Ubiquitination-GG	23.98	810.06	2313.17	114.997	393.1	P05661	Myosin heavy chain, muscle
1914	17K03_COLLAB-IT_CTRL_031.3382.3382.0	4	7.33	73.8	6150000	3.392	2	1	1	0	K443k	426	(R)	SKAGGAVTGDLMADLHNkLMLR	(R)	k:Ubiquitination-GG	21	604.12	2298.21	115.252	501.2	Q7JW27	WASH complex subunit 1
2165	17K03_COLLAB-IT_CTRL_031.1868.1868.0	5	7.05	62	9560000	3.375	2	2	2	0	K600k M602m K634k	586	(R)	RQPDNMVSLIGYNGkPmVYANGTITLAHAAQSGDSEEDGAPLDLIEMDk	(T)	k:Ubiquitination-GG,mOxidized methionine	11.49	1096.47	5232.49	245.829	319.1	Q9V4Z9	Protein lines
1885	17K03_COLLAB-IT_CTRL_031.2497.2504.0	5	7.37	71.3	17500000	3.345	0	0	0	0	M213m M216m	188	(R)	YYRAPEVILGMGYTENVDIWSVGCImGEmIR	(G)	C:Carbamidomethylation,m:Oxidized methionine	15.41	731.8	3622.72	32.2508	71.4	P92208	Stress-activated protein kinase JNK
2183	17K03_COLLAB-IT_CTRL_031.3807.3807.0	5	7.02	61	14300000	3.342	3	2	2	0	K830k M838m K851k	811	(R)	FPYHIKGVVSNDDLYGHDPkFLQEVNNmCAQVVDAILLQLk	(S)	C:Carbamidomethylation,k:Ubiquitination-GG,mOxidized methionine	23.68	995.01	4728.4	242.626	-292.7	Q9VHM2	UPF0505 protein CG8202
1254	17K03_COLLAB-IT_CTRL_013.1908.1908.0	3	8.37	77.4	4440000	3.328	2	1	1	0	K906k	904	(R)	NAkLTAQKNDLENQLR	(D)	k:Ubiquitination-GG	11.78	657.55	1856	114.637	301.5	P05661	Myosin heavy chain, muscle
2145	17K03_COLLAB-IT_CTRL_011.3057.3057.0	3	7.06	62.5	16800000	3.306	2	1	1	0	M1m K20k	1	(-)	mGCFGSPTSKQSDVNSEDSk	(S)	C:Carbamidomethylation,m:Oxidized methionine,kUbiquitination-GG	19.04	764.18	2160.92	129.608	-187.6	P20354	G protein alpha s subunit
78	17K03_COLLAB-IT_CTRL_012.3217.3227.3	3	18.08	93.1	16200000	3.251	2	1	1	0	K92k	86	(R)	ICLDVLkDKWSPALQIR	(T)	C:Carbamidomethylation,k:Ubiquitination-GG	20	723.81	2055.14	114.273	106.3	P35128	Ubiquitin-conjugating enzyme E2 N
2152	17K03_COLLAB-IT_CTRL_032.2659.2659.0	4	7.06	67.7	5720000	3.215	1	1	1	0	K1384k M1386m	1379	(K)	RSINCkSmPPSSGDEGSDVLATTVMV	(-)	C:Carbamidomethylation,k:Ubiquitination-GG,mOxidized methionine	16.35	717.36	2738.28	128.139	-662.5	P18168	Protein serrate
524	17K03_COLLAB-IT_CTRL_031.4367.4367.0	5	10.48	77.1	4260000	3.208	2	1	1	0	M665m K680k	642	(R)	ALLSWFLAQYQKIDADLIVTFDSmDCQLNVITDQIVALk	(I)	C:Carbamidomethylation,m:Oxidized methionine,kUbiquitination-GG	27.22	927.14	4499.32	132.347	498.5	P26019	DNA polymerase alpha catalytic subunit
1942	17K03_COLLAB-IT_CTRL_021.4104.4104.0	5	7.3	77.6	4850000	3.205	2	1	1	0	M919m K933k	881	(R)	SQLHSQAPGPGPPSTQPHHGNNGVVTSAHPITVGALDVmNVKQVVNRYGTLPk	(G)	m:Oxidized methionine,kUbiquitination-GG	25.2	1124.56	5489.82	128.946	-194.3	P00522	Tyrosine-protein kinase Abl
1089	17K03_COLLAB-IT_CTRL_031.1863.1876.2	2	8.67	75.4	5280000	3.197	3	1	1	0	K2634k	2620	(K)	DEYVVLLKVSDGGGkFGFASLK	(V)	k:Ubiquitination-GG	11.46	1221.96	2329.24	113.669	-153.1	Q9VW71	Fat-like cadherin-related tumor suppressor homolog
41	17K03_COLLAB-IT_CTRL_031.2666.2666.0	3	19.14	95.3	16900000	3.08	2	1	1	0	K962k	952	(K)	DIEDLELNVQkAEQDK	(A)	k:Ubiquitination-GG	16.46	668.2	1886.93	115.651	803.1	P05661	Myosin heavy chain, muscle
633	17K03_COLLAB-IT_CTRL_011.2778.2783.0	5	9.92	68.5	15500000	3.061	2	1	1	0	K471k M482m	471	(K)	kVQAIESTLTAmEVDEDAVQKLSEEEFQR	(K)	k:Ubiquitination-GG,mOxidized methionine	17.29	691.34	3323.63	129.04	-289.1	Q8MSU4	Symplekin
1562	17K03_COLLAB-IT_CTRL_022.3541.3541.0	3	7.87	64	32100000	3.02	1	0	0	0	M320m	315	(K)	ILRSLmISTMYHDAVSAYAFMKR	(Y)	m:Oxidized methionine	21.72	907.8	2704.38	17.0083	372.4	Q24087	DNA repair endonuclease XPF
639	17K03_COLLAB-IT_CTRL_012.3714.3714.0	5	9.88	74.2	5640000	3.005	2	0	0	0	M22m M26m	5	(K)	SHMYNAIPAGFESDEENmENLmSNLKIKR	(L)	m:Oxidized methionine	23.25	680.68	3368.57	30.8001	-350	Q9VIF1	Exonuclease mut-7 homolog
969	17K03_COLLAB-IT_CTRL_022.4310.4310.0	4	8.93	76.6	3120000	3.004	3	1	1	0	M88m M114m K117k	87	(K)	ImTLHPAQDEEQSGVGKKPTAQQLQALmDAk	(K)	m:Oxidized methionine,kUbiquitination-GG	26.59	878.46	3363.7	147.115	308.2	Q9I7I0	G2/mitotic-specific cyclin-B3
1134	17K03_COLLAB-IT_CTRL_011.1971.1971.0	4	8.57	67	4480000	2.982	2	1	1	0	K2233k	2215	(K)	LELELNSFVAIKMAEQLRk	(A)	k:Ubiquitination-GG	12.16	587.34	2232.24	114.096	22.7	Q9V5N8	Protocadherin-like wing polarity protein stan
1689	17K03_COLLAB-IT_CTRL_033.2139.2139.0	3	7.67	61.7	7250000	2.942	3	2	2	0	K1329k K1337k	1325	(K)	SISHkEESAKEEk	(E)	k:Ubiquitination-GG	13.03	577.3	1501.75	228.136	29.1	Q9W596	Microtubule-associated protein futsch
368	17K03_COLLAB-IT_CTRL_023.3117.3117.0	3	12.36	71.5	12800000	2.874	2	1	1	0	K9k	1	(-)	MQLFDDFCkSFNK	(E)	C:Carbamidomethylation,k:Ubiquitination-GG	19.14	599.32	1679.76	116.19	1195.4	O44252	Protein rolling stone
1606	17K03_COLLAB-IT_CTRL_012.2558.2563.0	5	7.78	60.2	6620000	2.858	3	1	1	0	K774k	772	(R)	HGkIAKPSTLSPIIGTPNKDSSSAQSPNHR	(S)	k:Ubiquitination-GG	15.8	648.67	3125.64	113.676	-113.3	Q9W2E1	Protein stum
2052	17K03_COLLAB-IT_CTRL_031.2151.2151.0	4	7.18	79	10300000	2.842	1	1	1	0	M357m K367k	351	(R)	DGECTDmIEEIRMNFDk	(K)	C:Carbamidomethylation,m:Oxidized methionine,kUbiquitination-GG	13.29	558.92	2102.88	129.775	-117.5	Q9W3M2	DM7 family protein CG15332
1544	17K03_COLLAB-IT_CTRL_031.3499.3499.0	5	7.9	64	20900000	2.833	3	1	1	0	K1374k	1361	(K)	FMYEDEESMSLVIkNVDTVDAGVYTIEAINELGQDESSINLVVKAPPK	(I)	k:Ubiquitination-GG	21.74	1083.36	5300.61	112.159	-348	A8DYP0	Obscurin
613	17K03_COLLAB-IT_CTRL_021.3875.3875.0	3	10	100	6220000	2.832	0	0	0	0	M436m M449m	424	(R)	NARESYMRCFYHmFTASLGGTYEQLmR	(L)	C:Carbamidomethylation,m:Oxidized methionine	23.75	1117.02	3319.49	29.5551	-727	Q8INF7	Dynein assembly factor 5, axonemal
1566	17K03_COLLAB-IT_CTRL_032.2592.2592.0	4	7.87	65.6	5300000	2.789	0	0	0	0	M850m M851m	850	(R)	mmGHDEMAENDGDMRR	(E)	m:Oxidized methionine	15.93	482.06	1894.73	30.4883	-779.9	Q24174	Protein abrupt
2160	17K03_COLLAB-IT_CTRL_023.2959.2959.0	5	7.05	78.4	5690000	2.781	1	0	0	0	M76m M89m	70	(R)	HTLGGDmLVYGSQHPHAHQmAPQQQRAMDLEMSTRAQK	(N)	m:Oxidized methionine	18.16	864.43	4286.02	32.0986	25.2	Q7KW14	Coiled-coil domain-containing protein CG32809
970	17K03_COLLAB-IT_CTRL_021.3196.3196.0	5	8.93	64.2	14000000	2.769	2	1	1	0	K686k M718m	679	(R)	MAAGDYAkPEMGNLISNGAGNPVLLVEGKQPYTLVSASLmLIR	(M)	k:Ubiquitination-GG,mOxidized methionine	19.45	924.22	4489.33	127.742	-497.3	Q9VLC0	Vacuolar protein sorting-associated protein 54
1808	17K03_COLLAB-IT_CTRL_021.3381.3381.0	3	7.48	72.3	14200000	2.767	2	1	1	0	K585k	583	(K)	VAkGDDLVAAVLESVPKEAQER	(G)	k:Ubiquitination-GG	20.66	813.75	2324.25	114.99	388.2	P91928	MICOS complex subunit Mic60
1410	17K03_COLLAB-IT_CTRL_033.2950.2959.0	3	8.09	78.6	8550000	2.721	3	1	1	0	M146m K149k	136	(R)	CGQGKLLFEWmLEkQGWSAHK	(C)	C:Carbamidomethylation,m:Oxidized methionine,kUbiquitination-GG	18.12	888.35	2533.25	129.788	-94	Q9W5X9	Alpha-tubulin N-acetyltransferase 2
499	17K03_COLLAB-IT_CTRL_012.1817.1819.0	4	10.75	77.5	10400000	2.681	0	0	0	0	M254m M255m	239	(R)	ALVMERLQTFMPPSVmmSPR	(R)	m:Oxidized methionine	11.13	589.6	2321.16	34.2145	944.5	Q7K0L4	WD repeat-containing protein 26 homolog
2093	17K03_COLLAB-IT_CTRL_022.2937.2937.0	4	7.13	62.1	44000000	2.673	2	1	1	0	K542k	522	(R)	ARKSLLSTWSSNHPYNAGSAk	(R)	k:Ubiquitination-GG	17.95	597.56	2275.16	112.06	-830.5	P04197	Myb protein
817	17K03_COLLAB-IT_CTRL_031.3089.3089.2	2	9.27	66.6	7500000	2.656	2	1	1	0	K800k	790	(K)	NLILLQDALDkSTAK	(I)	k:Ubiquitination-GG	19.14	879.42	1642.94	114.895	484.9	P35415	Paramyosin, long form
170	17K03_COLLAB-IT_CTRL_011.2069.2069.0	4	15.92	93	6640000	2.65	3	1	1	0	K276k	258	(K)	AAEQTESPPQAEPTVTAEkAAESEAKPTEPK	(K)	k:Ubiquitination-GG	12.77	834.86	3222.57	113.853	-56.8	P14199	Protein ref(2)P
1162	17K03_COLLAB-IT_CTRL_033.2567.2567.0	4	8.52	61.7	7050000	2.593	3	1	1	0	K1300k M1306m	1292	(R)	LAQLAQNQkLQPGGmPTSLGDPKSSGGHSHK	(E)	k:Ubiquitination-GG,mOxidized methionine	15.78	825.37	3169.62	128.841	-362.8	P51123	Transcription initiation factor TFIID subunit 1
1837	17K03_COLLAB-IT_CTRL_033.4255.4255.0	4	7.43	82.2	1210000	2.586	3	2	2	0	K724k K741k	723	(K)	AkPSSNLQQFLRKAHANMk	(K)	k:Ubiquitination-GG	26.46	600.58	2169.17	230.127	850.8	Q7K3L1	Guanylate kinase-associated protein mars
1343	17K03_COLLAB-IT_CTRL_031.2764.2770.0	4	8.23	62.5	372000000	2.54	2	0	0	0	M2350m M2365m M2366m	2346	(R)	HGSLmLTLFSPFWMINKTGmmLTYK	(S)	m:Oxidized methionine	17.12	749.02	2947.47	45.5841	-802.1	A1Z713	Vacuolar protein sorting-associated protein 13
867	17K03_COLLAB-IT_CTRL_013.2176.2176.0	5	9.15	65.4	6060000	2.53	2	1	1	0	M1m K16k	1	(-)	mLSIGAMANIKHTLQkELFLASGER	(L)	m:Oxidized methionine,kUbiquitination-GG	13.48	578.84	2758.47	131.697	573.9	Q9VVG4	Exocyst complex component 1
1564	17K03_COLLAB-IT_CTRL_022.2749.2749.0	5	7.87	66.7	8790000	2.521	3	1	1	0	M576m M581m K583k	575	(R)	VmDTSImPkVSSGNTHAPAVMIAEKGAYLLK	(R)	m:Oxidized methionine,kUbiquitination-GG	16.85	681.96	3259.69	146.082	14.5	P18173	Glucose dehydrogenase [FAD, quinone]
1810	17K03_COLLAB-IT_CTRL_032.2003.2003.0	4	7.48	91.7	12600000	2.494	2	1	1	0	K97k	91	(R)	GKVGLTkGLHIWEIYWPTR	(Q)	k:Ubiquitination-GG	12.27	593.39	2254.25	116.289	947.3	A1Z6E0	Protein gustavus
1481	17K03_COLLAB-IT_CTRL_032.1717.1724.0	4	7.98	72	3550000	2.49	3	0	0	0	M116m	103	(R)	WTNAKMEISLKTPmNPIK	(Q)	m:Oxidized methionine	10.45	530.28	2102.11	15.9845	-4.9	O77460	Inorganic pyrophosphatase
1217	17K03_COLLAB-IT_CTRL_031.2697.2697.0	5	8.43	96.3	6880000	2.438	3	1	1	0	K64k M72m	27	(R)	GFAPSLGQKSDPSHSEGNQASGGNGGGGDAQVGPSIEkSSLSAVQmHK	(S)	k:Ubiquitination-GG,mOxidized methionine	16.66	956.37	4650.19	127.633	-503.2	O76922	Protein aubergine
1441	17K03_COLLAB-IT_CTRL_032.3813.3813.0	4	8.04	65.2	13200000	2.339	2	1	1	0	K100k M113m M121m	98	(K)	VDkSSQIMSFLDKQNmLFVETADmLAR	(M)	k:Ubiquitination-GG,mOxidized methionine	23.7	816.42	3117.54	145.116	-280.9	Q9W0P8	Mediator of RNA polymerase II transcription subunit 14
1879	17K03_COLLAB-IT_CTRL_013.3062.3062.0	5	7.37	74.5	8920000	2.314	3	1	1	0	K818k	791	(R)	QSIAPNALLKSAILAAAEQNAAKTPPPkPR	(T)	k:Ubiquitination-GG	19.09	636.63	3066.74	112.379	-523.5	Q7K3L1	Guanylate kinase-associated protein mars
1165	17K03_COLLAB-IT_CTRL_033.3056.3062.0	5	8.52	69	10200000	2.307	0	0	0	0	M2493m	2471	(K)	SQVSQNNSNSLNVRANANSQMNmSPTGQPVQQQSPLR	(G)	m:Oxidized methionine	18.78	806.42	4011.91	16.1601	41	Q24270	Voltage-dependent calcium channel type D subunit alpha-1
1347	17K03_COLLAB-IT_CTRL_032.3633.3633.0	4	8.22	65.5	7580000	2.299	4	1	1	0	K186k	184	(R)	VGkQAVVLVATPGKPNTSYKVFGAKPLEDVLR	(N)	k:Ubiquitination-GG	22.57	875.24	3381.93	116.013	563.1	Q24312	DNA-binding protein Ewg
1975	17K03_COLLAB-IT_CTRL_021.3754.3754.0	5	7.25	100	14500000	2.279	2	1	1	0	K187k M201m	178	(K)	DAIMDNDFLkNIDASQVRELVDSmYSK	(S)	k:Ubiquitination-GG,mOxidized methionine	22.98	650	3117.49	128.484	-478.6	Q03042	cGMP-dependent protein kinase, isozyme 1
661	17K03_COLLAB-IT_CTRL_031.3364.3364.0	2	9.8	71.8	11500000	2.278	2	1	1	0	K271k	261	(R)	MMNIILGMTSkVVK	(D)	k:Ubiquitination-GG	20.89	840.82	1564.86	115.77	1027.9	Q9V3S0	Cytochrome P450 4g1
595	17K03_COLLAB-IT_CTRL_032.2968.2968.0	3	10.09	73.1	35800000	2.24	2	0	0	0	M335m	331	(K)	YMEDmVGGQGNVLTHHKTIK	(D)	m:Oxidized methionine	18.28	758.53	2258.11	15.4698	-231	Q04499	Proline dehydrogenase 1, mitochondrial
398	17K03_COLLAB-IT_CTRL_031.4192.4192.0	4	11.91	80.1	6590000	2.225	2	1	1	0	K46k	28	(K)	TVSGVNGPLVILDEVKFPkFAEIVQLR	(L)	k:Ubiquitination-GG	26.12	771.73	2968.69	115.211	378.8	P31409	V-type proton ATPase subunit B
949	17K03_COLLAB-IT_CTRL_012.3382.3430.0	4	8.96	81.2	14200000	2.224	1	0	0	0	M363m M367m	363	(R)	mRDEmAHQLQEYQGLMDIK	(V)	m:Oxidized methionine	21.14	592.98	2336.08	32.815	348.3	Q03427	Lamin-C
937	17K03_COLLAB-IT_CTRL_031.3001.3001.3	3	8.99	70	9300000	2.222	2	1	1	0	K72k	52	(R)	NGPVHAIQEFEVGTHLKLYSk	(K)	k:Ubiquitination-GG	18.59	827.5	2367.25	113.24	-323.7	P16163	Uricase
1857	17K03_COLLAB-IT_CTRL_013.1585.1649.0	4	7.4	92.9	17200000	2.221	2	1	1	0	K1026k M1028m	1013	(K)	ERPSFSQLGAALSkAmQSAEK	(-)	k:Ubiquitination-GG,mOxidized methionine	9.75	592.64	2236.14	131.399	575	Q6AWJ9	Tyrosine-protein kinase-like otk
1292	17K03_COLLAB-IT_CTRL_033.3845.3845.0	4	8.31	87.8	9100000	2.21	2	1	1	0	K358k	351	(K)	SPLEKAQkLAVLLGLPQPPTR	(V)	k:Ubiquitination-GG	23.88	593.07	2256.34	112.914	-476.3	Q9VN25	Eukaryotic translation initiation factor 3 subunit A
1967	17K03_COLLAB-IT_CTRL_022.3425.3425.0	4	7.26	73	8670000	2.193	2	1	1	0	K870k	848	(K)	DYLWRVITTGGEEIASKAIDLLk	(E)	k:Ubiquitination-GG	21	676.8	2591.41	112.77	-470.6	P55824	Probable ubiquitin carboxyl-terminal hydrolase FAF
2059	17K03_COLLAB-IT_CTRL_021.3328.3328.0	5	7.17	64.1	28200000	2.171	1	0	0	0	M532m	492	(K)	HLHKNPSDSGLTTELRSMSQVAGSAISNATQVIAEATTSLmETAR	(S)	m:Oxidized methionine	20.3	946.37	4711.34	16.4795	102.5	Q9GQQ0	Protein spinster
642	17K03_COLLAB-IT_CTRL_011.2499.2499.0	4	9.86	95.5	26700000	2.163	2	0	0	0	M1m M16m	1	(-)	mAYRKPSDLDGFIQQmPKADMR	(V)	m:Oxidized methionine	15.5	658.23	2598.26	31.6356	-134.7	Q9NBD7	CLIP-associating protein
575	17K03_COLLAB-IT_CTRL_031.3424.3424.0	5	10.2	70.7	12800000	2.122	0	0	0	0	M1m	1	(-)	mHPRYSPAPPPQQQQQMGGPPHQQQGGGGGGGVSMRGPSNAQQLPPQIPR	(S)	m:Oxidized methionine	21.27	1044.96	5206.51	14.2579	-332.7	Q8MSV2	Protein alan shepard
695	17K03_COLLAB-IT_CTRL_013.3045.3045.0	5	9.66	66.2	8440000	2.117	3	1	1	0	M5m K14k	1	(-)	MTQDmLLGNEEPSkSKETFLEK	(F)	m:Oxidized methionine,kUbiquitination-GG	18.97	538.32	2555.24	132.334	854.4	Q9V4S8	COP9 signalosome complex subunit 7
816	17K03_COLLAB-IT_CTRL_032.3552.3552.0	5	9.27	74.8	37400000	2.102	1	0	0	0	M285m	257	(R)	ILQLGDQVNDIMNFVFGSSLVGATIAICmSSVSIMLLDLASAFK	(Y)	C:Carbamidomethylation,m:Oxidized methionine	22.06	941.47	4689.4	13.9159	-442	Q9VU27	Putative odorant receptor 69a, isoform A
903	17K03_COLLAB-IT_CTRL_031.3612.3612.0	5	9.06	60.7	9320000	2.095	1	0	0	0	M1491m	1477	(K)	QKLFMQSAAASSSGmGYGPEDEDDEELYEEQPR	(E)	m:Oxidized methionine	22.45	743.4	3694.58	18.3913	645.4	Q9W3M3	E3 ubiquitin-protein ligase Ubr3
1635	17K03_COLLAB-IT_CTRL_032.2456.2456.0	4	7.75	64.9	19500000	2.093	2	1	1	0	K182k	166	(K)	IMTQNYLNFTGESAKFkDSQFLVFSNR	(L)	k:Ubiquitination-GG	15.11	825.2	3185.57	112.206	-557.1	Q9VEI3	Adenosine 3'-phospho 5'-phosphosulfate transporter 1
1654	17K03_COLLAB-IT_CTRL_012.2580.2580.0	4	7.71	72.2	9320000	2.082	2	0	0	0	M1496m	1474	(K)	GTKLDNGTLSTSVVLCNIQMDDmRSNSK	(S)	C:Carbamidomethylation,m:Oxidized methionine	15.94	776.32	3084.48	17.7823	576.2	A1Z713	Vacuolar protein sorting-associated protein 13
2111	17K03_COLLAB-IT_CTRL_021.2177.2177.0	4	7.11	81.6	4260000	2.079	1	1	1	0	M627m K648k	621	(K)	FDEYGRmISLTDNRMNFMEIDEFTYTLk	(T)	m:Oxidized methionine,kUbiquitination-GG	13.52	902.77	3479.6	128.463	-436.6	P11995	Larval serum protein 1 alpha chain
1101	17K03_COLLAB-IT_CTRL_022.2791.2791.0	3	8.64	78.8	31200000	2.058	2	1	1	0	K220k	220	(R)	kQKGEISDDETVR	(F)	k:Ubiquitination-GG	17.1	540.35	1504.76	114.275	143.5	Q9VU87	Vacuolar protein-sorting-associated protein 36
767	17K03_COLLAB-IT_CTRL_033.1894.1894.0	5	9.43	60.9	12200000	2.057	1	1	1	0	M564m K588k	553	(R)	LGSQASSEGSGmLDVLHCVLIDSPEALNMMRDEHIk	(V)	C:Carbamidomethylation,m:Oxidized methionine,kUbiquitination-GG	11.49	815.28	3939.87	132.5	604.6	Q24498	Ryanodine receptor
654	17K03_COLLAB-IT_CTRL_033.2679.2679.0	5	9.83	66.5	19200000	2.036	3	1	1	0	M117m K144k	99	(K)	YRPIEIDPHMPIAEKVQYmIEWWTKSGELTSGFPFDQSEIDQIASk	(Y)	m:Oxidized methionine,kUbiquitination-GG	16.47	1108.66	5410.64	128.627	-254.7	Q9W197	7-methylguanosine phosphate-specific 5'-nucleotidase
581	17K03_COLLAB-IT_CTRL_031.3095.3095.0	5	10.17	81.6	14500000	2.033	2	1	1	0	K163k M173m	142	(K)	AAVGEVEDTEMVESIENLEDTkGHSTKEWVSmLGPR	(T)	k:Ubiquitination-GG,mOxidized methionine	19.18	822.07	3973.88	132.441	585.4	P49735	DNA replication licensing factor Mcm2
1243	17K03_COLLAB-IT_CTRL_032.2610.2610.0	4	8.39	67.9	11900000	2.03	3	1	1	0	K137k M138m	128	(K)	NLFSNAVPKkmDVK	(T)	k:Ubiquitination-GG,mOxidized methionine	16.04	431.16	1590.87	130.751	414.2	P26019	DNA polymerase alpha catalytic subunit
880	17K03_COLLAB-IT_CTRL_021.1803.1808.0	3	9.11	94	21300000	2.005	1	0	0	0	M1m	1	(-)	mANMAVSRIKR	(E)	m:Oxidized methionine	11.14	431.7	1276.7	16.3878	303.8	P52486	Ubiquitin-conjugating enzyme E2-22 kDa
1468	17K03_COLLAB-IT_CTRL_023.2673.2673.0	5	8	65.1	9350000	2	4	2	2	0	K177k M194m K196k	177	(R)	kVATIVEGDNTIYLKIVmHkPDPPPVK	(D)	k:Ubiquitination-GG,mOxidized methionine	16.44	649.95	3002.68	243.046	-318.8	Q9VXA0	GATOR complex protein NPRL2
1970	17K03_COLLAB-IT_CTRL_032.2778.2778.0	5	7.26	65.3	8170000	1.981	0	0	0	0	M440m	420	(R)	DPVYFPNPNGYDPHRFDSNNmNYDQAAYMPFGEGPRHCIALR	(M)	C:Carbamidomethylation,m:Oxidized methionine	17.11	992.34	4943.19	14.4773	-306.1	Q9W223	Probable cytochrome P450 6d2
1408	17K03_COLLAB-IT_CTRL_011.3737.3737.0	5	8.09	72.9	5320000	1.926	3	2	2	0	K386k K401k	371	(K)	VLVSSNFESVALDKSkSVLVEFYAPWCGHCk	(Q)	C:Carbamidomethylation,k:Ubiquitination-GG	23.47	758.14	3556.76	229.911	481.9	P54399	Protein disulfide-isomerase
2038	17K03_COLLAB-IT_CTRL_022.1884.1884.2	2	7.19	72.8	1880000	1.916	3	1	1	0	K2634k	2620	(K)	DEYVVLLKVSDGGGkFGFASLK	(V)	k:Ubiquitination-GG	11.54	1222.7	2329.24	115.149	452.5	Q9VW71	Fat-like cadherin-related tumor suppressor homolog
887	17K03_COLLAB-IT_CTRL_021.3135.3135.0	4	9.09	77.1	31000000	1.877	2	1	1	0	K640k	626	(K)	HTEPVYSVAFSPDGkHLASGSFDK	(C)	k:Ubiquitination-GG	19.09	672.94	2576.24	112.497	-575.1	Q95RJ9	F-box-like/WD repeat-containing protein ebi
189	17K03_COLLAB-IT_CTRL_031.1959.1959.3	3	15.54	89	16300000	1.874	3	1	1	0	K216k	204	(K)	KPLPDNVSVVEPkEEK	(I)	k:Ubiquitination-GG	12.07	641.66	1807.98	114.985	490.1	Q06559	40S ribosomal protein S3
815	17K03_COLLAB-IT_CTRL_021.3547.3547.0	5	9.27	63.3	16300000	1.858	3	2	2	0	M929m K933k K934k M938m	916	(R)	KMSDIGLVLPQGImETMkkPIDmGGLGLGLGPDSSVSGGIVCTR	(V)	C:Carbamidomethylation,m:Oxidized methionine,kUbiquitination-GG	21.69	955.48	4515.31	258.056	-423.2	Q9VWE0	Cytokine receptor
1686	17K03_COLLAB-IT_CTRL_023.3641.3641.0	4	7.67	70.8	6790000	1.852	1	1	1	0	K1400k M1404m	1389	(R)	HLALLCDVMTAkGHLmAITR	(H)	C:Carbamidomethylation,k:Ubiquitination-GG,mOxidized methionine	22.48	595.89	2251.19	129.351	-288.5	P04052	DNA-directed RNA polymerase II subunit RPB1
1259	17K03_COLLAB-IT_CTRL_012.1354.1354.0	5	8.36	69	4050000	1.849	2	1	1	0	K527k	492	(R)	LAGDQTEEQKQQQGSAGGNAAGSAAEGSGSGNASNk	(V)	k:Ubiquitination-GG	8.24	696.28	3362.51	114.863	235.9	P45437	Coatomer subunit beta
802	17K03_COLLAB-IT_CTRL_022.4067.4067.0	5	9.31	70.6	6280000	1.835	1	0	0	0	M77m M96m	63	(R)	ILQDGEPQFIQENTmQHNLSKDVMLVATATVLAmNR	(L)	m:Oxidized methionine	25.06	818.46	4056.03	32.2358	60.2	Q8I8U7	Transcription-associated protein 1
1700	17K03_COLLAB-IT_CTRL_022.4946.4946.0	5	7.64	92.1	7000000	1.832	1	0	0	0	M325m M342m	324	(R)	DmQAKLGENAIPMPSEEFmNLDLDTCVR	(N)	C:Carbamidomethylation,m:Oxidized methionine	30.59	652.41	3224.47	33.5478	478.2	Q86BJ3	Heparan sulfate 2-O-sulfotransferase pipe
697	17K03_COLLAB-IT_CTRL_031.1824.1824.0	4	9.66	72.5	7200000	1.804	2	1	1	0	K694k M698m	685	(K)	AIEITEAMEkRGAmFLAQSK	(A)	k:Ubiquitination-GG,mOxidized methionine	11.22	589.72	2224.15	131.712	710.5	Q9W157	Breast cancer type 2 susceptibility protein homolog
991	17K03_COLLAB-IT_CTRL_022.3006.3006.0	3	8.9	78.5	22300000	1.801	3	1	1	0	M146m K149k	136	(R)	CGQGKLLFEWmLEkQGWSAHK	(C)	C:Carbamidomethylation,m:Oxidized methionine,kUbiquitination-GG	18.36	888.16	2533.25	129.218	-308.1	Q9W5X9	Alpha-tubulin N-acetyltransferase 2
1169	17K03_COLLAB-IT_CTRL_012.1866.1866.0	5	8.51	76.6	4420000	1.772	2	0	0	0	M10m	1	(-)	MVTPQSPTPmFNGLDDDLYSDAKYAHEINDKMR	(V)	m:Oxidized methionine	11.44	763.64	3799.74	14.4308	-410.1	Q961C9	Transport and Golgi organization protein 11
355	17K03_COLLAB-IT_CTRL_033.3577.3577.0	3	12.69	74.7	5930000	1.74	2	1	1	0	M333m K335k	324	(R)	LALLDAMVEmAkNPDIEWNEK	(D)	m:Oxidized methionine,kUbiquitination-GG	22.18	854.76	2430.2	132.061	789.6	Q9V3S0	Cytochrome P450 4g1
1643	17K03_COLLAB-IT_CTRL_021.2770.2817.0	3	7.73	73.3	98100000	1.73	2	1	1	0	M132m K137k	128	(K)	KRQAmLQAMk	(D)	m:Oxidized methionine,kUbiquitination-GG	16.91	445.06	1204.66	128.5	-1153.4	P19351	Troponin T, skeletal muscle
1999	17K03_COLLAB-IT_CTRL_022.5585.5585.0	5	7.23	65.2	2730000	1.722	2	1	1	0	M497m K503k	484	(K)	LTKDQSIDSPNYPmDYMPDkECVWR	(I)	C:Carbamidomethylation,m:Oxidized methionine,kUbiquitination-GG	34.61	644.39	3088.39	129.536	-156	P25723	Dorsal-ventral patterning protein tolloid
1550	17K03_COLLAB-IT_CTRL_032.2102.2102.0	5	7.9	73.2	4830000	1.718	1	1	1	0	K27k M37m	18	(R)	SCLLLSMGGkNIMLDCGMHmGYNDER	(R)	C:Carbamidomethylation,k:Ubiquitination-GG,mOxidized methionine	12.89	627.19	3002.31	129.609	-136.9	Q9VAH9	Integrator complex subunit 11
473	17K03_COLLAB-IT_CTRL_032.3004.3004.0	4	10.93	73.7	12900000	1.708	3	2	2	0	K436k K459k	432	(K)	QAFEkVGEATETALIVLAEKLNSFSVNk	(S)	k:Ubiquitination-GG	18.5	816.44	3036.62	226.113	-604.7	P22700	Calcium-transporting ATPase sarcoplasmic/endoplasmic reticulum type
1528	17K03_COLLAB-IT_CTRL_013.3473.3473.0	5	7.91	72.1	8800000	1.703	1	0	0	0	M450m M452m M477m	444	(K)	GGYQPSmGmPSQYSYQGNSQIMHGSSQYRNQSHmGGANK	(L)	m:Oxidized methionine	21.72	860.3	4250.83	46.6425	-312.3	Q8SWR8	Ataxin-2 homolog
755	17K03_COLLAB-IT_CTRL_023.4253.4253.0	4	9.47	66.5	3540000	1.676	2	1	1	0	K46k	28	(K)	TVSGVNGPLVILDEVKFPkFAEIVQLR	(L)	k:Ubiquitination-GG	26.33	771.76	2968.69	115.331	417.7	P31409	V-type proton ATPase subunit B
1032	17K03_COLLAB-IT_CTRL_013.3709.3709.0	5	8.79	81.4	6680000	1.672	1	0	0	0	M284m	240	(K)	SYELPDGQVITIGNERFRCPEALFQPSFLGMESCGIHETVYNSImK	(C)	C:Carbamidomethylation,m:Oxidized methionine	23.21	1068.15	5320.52	16.1999	38.4	P83967	Actin, indirect flight muscle
1851	17K03_COLLAB-IT_CTRL_021.3711.3711.0	5	7.41	65.4	20500000	1.661	2	1	1	0	K1055k	1026	(R)	GGTRHDGSLSDTQTYAEVKPEYSSYAMWLkHSNTAGSR	(L)	k:Ubiquitination-GG	22.71	861.53	4187.95	115.673	378.8	Q9VIQ9	Protein sickie
2020	17K03_COLLAB-IT_CTRL_011.2917.2937.0	4	7.21	73.6	15900000	1.659	2	1	1	0	K530k	517	(R)	SALINLPNIPLKFkFIDLPN	(-)	k:Ubiquitination-GG	18.15	596.03	2267.32	113.782	-109.6	Q9VE00	Probable cytochrome P450 12a4, mitochondrial
566	17K03_COLLAB-IT_CTRL_013.3893.3893.0	5	10.23	60.7	6450000	1.652	2	1	1	0	M176m M185m K190k	165	(R)	RSNPETIGDGSmLASTSTAVmLQTKkPAVIVEMER	(R)	m:Oxidized methionine,kUbiquitination-GG	24.37	779.71	3747.91	146.613	149	Q9VMA3	Protein cup
698	17K03_COLLAB-IT_CTRL_032.1820.1829.0	4	9.66	73.6	7650000	1.647	0	0	0	0	M254m M255m	239	(R)	ALVMERLQTFMPPSVmmSPR	(R)	m:Oxidized methionine	11.11	589.55	2321.16	34.0145	859.7	Q7K0L4	WD repeat-containing protein 26 homolog
946	17K03_COLLAB-IT_CTRL_011.1943.1943.0	5	8.97	62.7	5070000	1.646	2	1	1	0	K71k	53	(K)	VAVAASGGKDSTVLAHVLkLLNER	(H)	k:Ubiquitination-GG	11.98	513.08	2448.39	112.978	-415.9	Q7JWW5	Cytoplasmic tRNA 2-thiolation protein 1
853	17K03_COLLAB-IT_CTRL_023.1826.1845.0	5	9.18	79.4	9870000	1.643	2	1	1	0	M1m K15k	1	(-)	mSLTITSSVTHPELkDLSTVRNEQK	(E)	m:Oxidized methionine,kUbiquitination-GG	11.15	589.82	2814.47	130.604	192.3	P08761	Peptide methionine sulfoxide reductase
1991	17K03_COLLAB-IT_CTRL_021.3727.3727.0	4	7.24	66.3	14200000	1.604	2	1	1	0	M2195m K2229k	2190	(K)	STEALmATRPEVIIAPNKASVSPATAARSVIVLAGGSCLk	(T)	C:Carbamidomethylation,m:Oxidized methionine,kUbiquitination-GG	22.81	1042.93	4037.19	131.51	353	P51592	E3 ubiquitin-protein ligase hyd
635	17K03_COLLAB-IT_CTRL_031.3528.3528.0	5	9.92	81.8	8830000	1.601	2	2	2	0	K2k M17m K28k	1	(-)	MkTETGSNNNNTTVVNmDFDMYPSISGkQQDPVR	(E)	k:Ubiquitination-GG,mOxidized methionine	21.92	813.44	3818.74	244.429	85.7	Q24522	Protein bunched, class 1/class 3/D/E isoforms
1615	17K03_COLLAB-IT_CTRL_021.2802.2802.0	3	7.77	86.7	90500000	1.583	2	1	1	0	M225m K242k	225	(R)	mQKYMIMALRATLSCDTk	(C)	C:Carbamidomethylation,m:Oxidized methionine,kUbiquitination-GG	17.09	764.67	2161.06	130.932	390	Q70PP2	Serine/threonine-protein kinase Smg1
1079	17K03_COLLAB-IT_CTRL_031.2934.2934.0	5	8.7	80.6	13500000	1.579	0	0	0	0	M911m	905	(K)	DRDEPAmSSVGPTMWLGAQDGWLYVHSSVGRWHECLHR	(V)	C:Carbamidomethylation,m:Oxidized methionine	18.16	889.07	4423.03	18.2867	516	Q9GQF1	JNK-interacting protein 3
725	17K03_COLLAB-IT_CTRL_013.1854.1861.0	5	9.55	72.4	11400000	1.574	3	1	1	0	M175m K178k	169	(R)	EWGGLImNSkYYNYSINLNGQKIK	(H)	m:Oxidized methionine,kUbiquitination-GG	11.44	593.49	2833.43	129.987	-17.2	Q9VEX0	Extracellular sulfatase SULF-1 homolog
804	17K03_COLLAB-IT_CTRL_011.3721.3728.0	5	9.3	91	15300000	1.574	1	0	0	0	M255m	244	(K)	YLQMLTAAFRWmAFTLMICISLKLLISR	(G)	C:Carbamidomethylation,m:Oxidized methionine	23.37	681.94	3390.83	14.8384	-339.6	Q9VPF8	Transmembrane protein 104 homolog
739	17K03_COLLAB-IT_CTRL_031.4753.4753.0	4	9.52	77.3	3720000	1.569	3	1	1	0	M280m M284m K285k	264	(R)	MAVDGKSIDEHNEILGmDLAmkYINASLVQK	(I)	m:Oxidized methionine,kUbiquitination-GG	29.66	895.83	3433.72	146.582	153.3	Q8SWV6	Adenosine monophosphate-protein transferase FICD homolog
130	17K03_COLLAB-IT_CTRL_031.3189.3196.0	3	16.9	89.7	22200000	1.551	2	1	1	0	K92k	86	(R)	ICLDVLkDKWSPALQIR	(T)	C:Carbamidomethylation,k:Ubiquitination-GG	19.77	723.78	2055.14	114.183	64.8	P35128	Ubiquitin-conjugating enzyme E2 N
1602	17K03_COLLAB-IT_CTRL_033.3969.3969.0	3	7.79	71.3	3990000	1.54	1	0	0	0	M322m	318	(K)	CISGmYMGELVRLVITDMIAK	(G)	C:Carbamidomethylation,m:Oxidized methionine	24.66	805.63	2400.22	14.6597	-552.9	Q9NFT7	Hexokinase type 2
1284	17K03_COLLAB-IT_CTRL_033.3756.3756.0	5	8.32	76.1	9710000	1.538	4	2	2	0	K563k K580k	543	(R)	QSQYSTKTTSSSVANLSLHEkPSVEKPLVISSSVDPQkTTIFR	(-)	k:Ubiquitination-GG	23.3	987.3	4705.47	227.003	-219.6	Q9W0R5	Probable G-protein coupled receptor Mth-like 10
2001	17K03_COLLAB-IT_CTRL_021.3622.3622.0	4	7.23	64.1	17300000	1.526	2	1	1	0	M1287m M1300m K1303k	1273	(K)	VDGLQCQVVLNQMHmQTLHLKVSQLPPmPDk	(H)	C:Carbamidomethylation,m:Oxidized methionine,kUbiquitination-GG	22.16	933	3584.82	144.157	-502.9	Q9W0P8	Mediator of RNA polymerase II transcription subunit 14
1393	17K03_COLLAB-IT_CTRL_023.3696.3696.0	4	8.13	71.4	9740000	1.517	2	1	1	0	K262k M269m M274m M285m	262	(K)	kYCQLLSmTLKNmEIDNVCLHGFmR	(Q)	C:Carbamidomethylation,k:Ubiquitination-GG,mOxidized methionine	22.82	816.71	3101.49	162.332	93.2	Q07886	Probable ATP-dependent RNA helicase Dbp45A
2137	17K03_COLLAB-IT_CTRL_031.1882.1882.0	4	7.08	90.8	28000000	1.504	1	0	0	0	M247m	244	(K)	YLQmLTAAFRWMAFTLMICISLKLLISR	(G)	C:Carbamidomethylation,m:Oxidized methionine	11.58	852.84	3390.83	17.5057	443.3	Q9VPF8	Transmembrane protein 104 homolog
1380	17K03_COLLAB-IT_CTRL_032.3430.3430.0	5	8.15	83.9	20100000	1.486	2	1	1	0	K116k M134m	116	(K)	kQQLLMVGQAYKVIVNIDmPESPQNLELGMFMVCAEMR	(D)	C:Carbamidomethylation,k:Ubiquitination-GG,mOxidized methionine	21.28	908.9	4411.18	129.29	-164.8	Q9V3X4	Seipin
1584	17K03_COLLAB-IT_CTRL_031.1785.1785.0	4	7.82	80.9	2050000	1.479	3	2	2	0	K507k K528k	505	(R)	QLkINSQIASMPIELKSHHNSSPk	(E)	k:Ubiquitination-GG	10.96	729.09	2687.43	225.908	-747.4	O61643	Inhibin beta chain
965	17K03_COLLAB-IT_CTRL_011.3798.3798.0	5	8.93	94.9	13100000	1.471	3	1	1	0	M119m K138k	104	(R)	DLEEVVQKGELLLEKmQYSLECIAQAQLDMQITLk	(H)	C:Carbamidomethylation,m:Oxidized methionine,kUbiquitination-GG	23.85	848.15	4107.11	129.615	-99.9	Q9W5P1	Mediator of RNA polymerase II transcription subunit 21
1121	17K03_COLLAB-IT_CTRL_022.3208.3208.0	5	8.61	77.5	12700000	1.471	2	1	1	0	M432m K443k M444m	430	(R)	VVmAEVNNAIVAVkmVKEGHTDDDIASLVR	(E)	m:Oxidized methionine,kUbiquitination-GG	19.61	674.81	3223.68	146.339	91	Q07407	Fibroblast growth factor receptor homolog 1
2074	17K03_COLLAB-IT_CTRL_033.3885.3885.0	4	7.16	69.5	3920000	1.463	3	1	1	0	M92m K96k	88	(K)	FKLTmSDAkLYNLANSMMVK	(S)	m:Oxidized methionine,kUbiquitination-GG	24.13	609.64	2305.18	130.363	133.5	O76879	Circadian clock-controlled protein
1362	17K03_COLLAB-IT_CTRL_012.3046.3052.0	5	8.18	74.6	6000000	1.462	2	1	1	0	M588m K591k	578	(K)	DGNTALHLATmENkPHAISVLMSMGCK	(L)	C:Carbamidomethylation,m:Oxidized methionine,kUbiquitination-GG	18.88	611.7	2926.4	128.067	-645.3	Q7Z020	Transient receptor potential cation channel subfamily A member 1
1206	17K03_COLLAB-IT_CTRL_022.2983.2983.0	4	8.46	70.7	32100000	1.426	2	1	1	0	K863k	842	(K)	SATYFDGEAVPKRSHALLPHAk	(I)	k:Ubiquitination-GG	18.22	628.34	2395.25	115.087	415.7	Q9V3L1	Bifunctional heparan sulfate N-deacetylase/N-sulfotransferase
2010	17K03_COLLAB-IT_CTRL_013.2713.2713.0	4	7.22	63.3	9410000	1.4	2	1	1	0	M233m K243k	230	(R)	HDLmTNLTTEKVSkISLVDLAGSER	(A)	m:Oxidized methionine,kUbiquitination-GG	16.86	723.01	2757.45	131.573	531.4	A1ZAJ2	Kinesin-like protein unc-104
2103	17K03_COLLAB-IT_CTRL_023.3460.3460.0	5	7.12	75.2	7710000	1.388	2	2	2	0	K199k M214m K223k	196	(K)	DPTkQSNLAHMMSLSADImPQYRQEAPk	(T)	k:Ubiquitination-GG,mOxidized methionine	21.32	687.16	3187.53	244.238	45.7	Q02280	Potassium voltage-gated channel protein eag
207	17K03_COLLAB-IT_CTRL_032.3720.3720.0	3	15.16	87.5	10500000	1.383	2	1	1	0	K238k	226	(R)	GVVDAVNALEPIkAWIEK	(R)	k:Ubiquitination-GG	23.12	689.45	1952.09	114.25	100.4	P41043	Glutathione S-transferase S1
1323	17K03_COLLAB-IT_CTRL_013.3669.3669.0	5	8.25	74.8	5440000	1.358	2	1	1	0	K248k M253m	248	(R)	kPAADmVIAMLQPNPESRPAIGQLLNFEFLK	(G)	k:Ubiquitination-GG,mOxidized methionine	22.96	714.57	3438.83	129.993	-12.5	P52304	Serine/threonine-protein kinase polo
1273	17K03_COLLAB-IT_CTRL_023.3418.3418.0	2	8.34	61.5	8120000	1.352	2	1	1	0	K271k	261	(R)	MMNIILGMTSkVVK	(D)	k:Ubiquitination-GG	21.06	839.99	1564.86	114.11	40.2	Q9V3S0	Cytochrome P450 4g1
1944	17K03_COLLAB-IT_CTRL_032.2922.2922.0	4	7.3	61.3	8310000	1.351	2	1	1	0	M1827m K1839k	1823	(K)	DLFTmEQSEQDESSQEkSENK	(D)	m:Oxidized methionine,kUbiquitination-GG	17.99	655.17	2489.06	128.596	-550.8	Q9NDJ2	Helicase domino
1166	17K03_COLLAB-IT_CTRL_013.2235.2235.0	4	8.51	63.9	8910000	1.347	1	0	0	0	M874m	853	(R)	AGILTGFSQLVEMANLGGYLLmK	(G)	m:Oxidized methionine	13.86	610.99	2426.28	14.656	-548.5	Q9VF30	DNA replication licensing factor REC
2153	17K03_COLLAB-IT_CTRL_032.3285.3285.0	4	7.06	79.3	12500000	1.341	3	2	2	0	K108k K119k	88	(R)	VLNQSGAPENQVHLAACNGDkNQIINQKMQLk	(S)	C:Carbamidomethylation,k:Ubiquitination-GG	20.34	947.56	3560.81	226.412	-441.9	Q8T053	Uncharacterized zinc finger protein CG2678
1092	17K03_COLLAB-IT_CTRL_032.2736.2736.0	4	8.67	79.5	12900000	1.33	2	1	1	0	M233m K243k	230	(R)	HDLmTNLTTEKVSkISLVDLAGSER	(A)	m:Oxidized methionine,kUbiquitination-GG	16.82	723.02	2757.45	131.613	545.2	A1ZAJ2	Kinesin-like protein unc-104
2013	17K03_COLLAB-IT_CTRL_033.1915.1915.0	4	7.22	64	9850000	1.302	2	1	1	0	M588m K591k M599m	578	(K)	DGNTALHLATmENkPHAISVLmSMGCK	(L)	C:Carbamidomethylation,m:Oxidized methionine,kUbiquitination-GG	11.62	768.27	2926.4	143.654	-774.8	Q7Z020	Transient receptor potential cation channel subfamily A member 1
892	17K03_COLLAB-IT_CTRL_022.3994.3994.0	5	9.08	62.2	15900000	1.295	2	1	1	0	M108m K132k M152m	107	(K)	SmPDGQPMMVPGLPPTMRQPPPLPRkPASTQSSAQNSAQSSPLAGmK	(F)	m:Oxidized methionine,kUbiquitination-GG	24.6	1006.51	4884.41	144.112	-381.9	Q9VDW3	Dystrophin, isoform B
693	17K03_COLLAB-IT_CTRL_013.1960.2022.0	5	9.67	71.8	11400000	1.25	2	1	1	0	M328m K341k	326	(K)	KPmVMRSDTNTHTSSk	(K)	m:Oxidized methionine,kUbiquitination-GG	12.1	390.75	1819.88	129.842	-100.5	P05130	Protein kinase C, brain isozyme
1498	17K03_COLLAB-IT_CTRL_031.2089.2089.0	4	7.96	76.4	16700000	1.231	2	1	1	0	K1314k	1310	(K)	VMKWkSPILEQTSDAILLAAQSGDLNMLR	(A)	k:Ubiquitination-GG	12.88	836.18	3228.71	112.986	-316.2	Q09103	Eye-specific diacylglycerol kinase
1667	17K03_COLLAB-IT_CTRL_033.1902.1902.0	4	7.7	65.7	2970000	1.224	0	0	0	0	M431m	410	(K)	LASLQQVEETQDQLNQALQMDmPITPFEPCEVAEVIVR	(Q)	C:Carbamidomethylation,m:Oxidized methionine	11.54	1096.73	4370.14	13.7629	-509.1	Q9NBX4	Probable RNA-directed DNA polymerase from transposon X-element
263	17K03_COLLAB-IT_CTRL_013.3067.3067.2	2	14.07	88.1	7230000	1.216	2	1	1	0	K804k	790	(K)	NLILLQDALDKSTAk	(I)	k:Ubiquitination-GG	19.12	879.07	1642.94	114.195	86.7	P35415	Paramyosin, long form
1659	17K03_COLLAB-IT_CTRL_031.2976.2976.0	5	7.71	81.7	11200000	1.206	2	0	0	0	M556m	547	(R)	EWMIVDMNGmALTQKRCTELCLIRPVIK	(V)	C:Carbamidomethylation,m:Oxidized methionine	18.42	684.76	3405.73	14.0373	-572.4	Q9VRA2	Molybdenum cofactor sulfurase
344	17K03_COLLAB-IT_CTRL_012.3563.3563.0	4	12.82	73.4	6710000	1.202	2	1	1	0	K183k	160	(K)	VINDNFEIVEGLMTTVHATTATQkTVDGPSGK	(L)	k:Ubiquitination-GG	22.3	872.92	3373.69	114.964	263.9	P07486	Glyceraldehyde-3-phosphate dehydrogenase 1
2043	17K03_COLLAB-IT_CTRL_021.4464.4464.0	5	7.19	80.6	3370000	1.195	0	0	0	0	M179m M183m M194m	178	(R)	YmVWQmPFWQGSIMLVmNILYYRDIQLYR	(Q)	m:Oxidized methionine	27.47	761.9	3757.86	47.6155	-97	Q9VVV2	Organic solute transporter alpha-like protein
1955	17K03_COLLAB-IT_CTRL_031.3442.3442.0	4	7.28	65.8	7910000	1.194	2	2	2	0	M601m K618k K619k	597	(R)	EDLVmMLNCTDPTQPPSTHELkkETQER	(C)	C:Carbamidomethylation,m:Oxidized methionine,kUbiquitination-GG	21.39	893.3	3327.57	242.613	-411.2	Q9W4M9	tRNA (cytosine(34)-C(5))-methyltransferase
1239	17K03_COLLAB-IT_CTRL_023.2198.2198.0	5	8.39	68.1	6630000	1.181	3	1	1	0	M526m K548k	524	(R)	ADmIVAPLTINPERAEYIEFSKPFkYQGITILEK	(K)	m:Oxidized methionine,kUbiquitination-GG	13.49	811.66	3925.08	129.189	-209.4	Q24418	Glutamate [NMDA] receptor subunit 1
2007	17K03_COLLAB-IT_CTRL_031.4112.4112.0	4	7.23	84	6710000	1.179	0	0	0	0	M376m M403m	376	(R)	mQGEARLEQLLAHALPENQEIIRSGYEmLTDPAQMGTR	(F)	m:Oxidized methionine	25.62	1083.49	4297.12	33.8219	423	Q9VGR2	Protein arginine methyltransferase NDUFAF7 homolog, mitochondrial
441	17K03_COLLAB-IT_CTRL_032.2335.2335.0	4	11.32	80	11100000	1.174	3	1	1	0	K1021k	1005	(K)	TGEELQAAEDKINHLNkVK	(A)	k:Ubiquitination-GG	14.39	563.42	2137.12	113.533	-226.4	P05661	Myosin heavy chain, muscle
2195	17K03_COLLAB-IT_CTRL_021.2951.2951.0	5	7.01	78.3	30000000	1.173	2	1	1	0	K818k	792	(R)	SQSALGPCQMLLQTAGDISEFIKANTk	(D)	C:Carbamidomethylation,k:Ubiquitination-GG	17.95	605.22	2908.45	113.617	-141.1	Q9W3E1	Integrator complex subunit 4
209	17K03_COLLAB-IT_CTRL_031.3566.3566.0	4	15.16	76.1	14200000	1.164	2	1	1	0	K183k	160	(K)	VINDNFEIVEGLMTTVHATTATQkTVDGPSGK	(L)	k:Ubiquitination-GG	22.16	873.24	3373.69	116.244	630.6	P07486	Glyceraldehyde-3-phosphate dehydrogenase 1
2108	17K03_COLLAB-IT_CTRL_011.2053.2053.0	3	7.11	78	6510000	1.164	2	1	1	0	K122k	110	(K)	CEDSGLRVNGKGk	(K)	C:Carbamidomethylation,k:Ubiquitination-GG	12.67	511.78	1419.7	113.625	-272.8	P20009	Homeotic protein distal-less
178	17K03_COLLAB-IT_CTRL_013.3064.3064.2	2	15.75	91.4	7000000	1.162	2	1	1	0	K800k	790	(K)	NLILLQDALDkSTAK	(I)	k:Ubiquitination-GG	19.1	879.02	1642.94	114.095	29.8	P35415	Paramyosin, long form
1040	17K03_COLLAB-IT_CTRL_011.2977.2977.0	5	8.78	92.4	5960000	1.161	3	1	1	0	K693k M699m M704m	689	(R)	KYSHkFGYGLmDAGAmVSLAEQWTSVPPQHICK	(S)	C:Carbamidomethylation,k:Ubiquitination-GG,mOxidized methionine	18.53	777.63	3736.81	147.314	329.8	P30432	Furin-like protease 2
1073	17K03_COLLAB-IT_CTRL_022.2394.2394.0	5	8.71	86.6	8720000	1.159	2	1	1	0	M516m K532k	512	(K)	YVANmHGNEVVGKELLLILTk	(Y)	m:Oxidized methionine,kUbiquitination-GG	14.73	494.92	2341.3	129.276	-308.3	P42787	Carboxypeptidase D
1391	17K03_COLLAB-IT_CTRL_021.3356.3356.0	4	8.13	69.9	15900000	1.159	3	0	0	0	M224m M234m	215	(R)	EGTNLLGGMmYPKVQKYCLmSVK	(N)	C:Carbamidomethylation,m:Oxidized methionine	20.49	670.2	2647.31	30.4667	-568.8	Q9VHH9	JmjC domain-containing histone demethylation protein 1
1554	17K03_COLLAB-IT_CTRL_032.1842.1842.0	5	7.89	70.6	7660000	1.146	1	0	0	0	M334m M346m	323	(K)	ALINDCNCNASmLKTNPAHVMSCmR	(S)	C:Carbamidomethylation,m:Oxidized methionine	11.25	589.14	2908.28	33.3896	475.8	P07140	Acetylcholinesterase
1971	17K03_COLLAB-IT_CTRL_033.2569.2569.0	4	7.26	72.9	7210000	1.146	2	0	0	0	M158m	152	(R)	FRIIMDmIFSCPPNEKK	(H)	C:Carbamidomethylation,m:Oxidized methionine	15.79	536.31	2126.06	16.1586	76.4	Q24472	Retinoblastoma family protein
1196	17K03_COLLAB-IT_CTRL_022.3642.3642.0	5	8.47	60.8	10900000	1.143	2	1	1	0	M166m M175m K185k	149	(R)	NEVPPHIFAISDGAYVDmLTNHVNQSmLITGESGAGkTENTK	(K)	m:Oxidized methionine,kUbiquitination-GG	22.39	927.54	4486.16	147.506	317.8	P05661	Myosin heavy chain, muscle
1581	17K03_COLLAB-IT_CTRL_023.3346.3346.0	4	7.83	70.1	23600000	1.142	3	1	1	0	M488m K504k	470	(K)	FSVPPVGPIETSEQGTVVmHCQAIGDPKPTIQWDkDLK	(Y)	C:Carbamidomethylation,m:Oxidized methionine,kUbiquitination-GG	20.62	1084.48	4205.1	129.794	-56.3	Q6AWJ9	Tyrosine-protein kinase-like otk
1603	17K03_COLLAB-IT_CTRL_032.1905.1905.0	3	7.79	71.9	2810000	1.141	2	1	1	0	K157k	141	(R)	GQGGGFQNRGATGSGPkPPPK	(Q)	k:Ubiquitination-GG	11.65	704.09	1995.02	115.24	567.2	P41073	Zinc finger protein on ecdysone puffs
1647	17K03_COLLAB-IT_CTRL_032.3596.3596.0	3	7.73	60.1	17300000	1.137	2	1	1	0	K682k	656	(K)	NVFGTSSSSAGSTASTFSASTNLKLGk	(E)	k:Ubiquitination-GG	22.34	908.02	2607.29	114.756	261.9	P20659	Histone-lysine N-methyltransferase trithorax
1976	17K03_COLLAB-IT_CTRL_021.3747.3747.0	3	7.25	100	11000000	1.137	2	1	1	0	M49m K60k	44	(R)	ELEEQmSALRKENFNLk	(L)	m:Oxidized methionine,kUbiquitination-GG	22.94	736.41	2079.05	128.161	-850.1	P54623	Centrosomin
134	17K03_COLLAB-IT_CTRL_022.3764.3784.0	3	16.86	92.5	20500000	1.136	2	1	1	0	K238k	226	(R)	GVVDAVNALEPIkAWIEK	(R)	k:Ubiquitination-GG	23.16	689.67	1952.09	114.91	419.6	P41043	Glutathione S-transferase S1
1035	17K03_COLLAB-IT_CTRL_021.1617.1617.0	4	8.79	60.6	14600000	1.136	2	1	1	0	M775m M776m K803k	774	(K)	QmmSGAGTSGSLTPNNNCTLMSNKLGLPVk	(G)	C:Carbamidomethylation,m:Oxidized methionine,kUbiquitination-GG	9.95	814.3	3108.49	145.684	-107.3	Q9V5M6	Longitudinals lacking protein, isoforms J/P/Q/S/Z
1093	17K03_COLLAB-IT_CTRL_012.3503.3503.0	5	8.66	66.4	7610000	1.116	2	1	1	0	M582m M589m K590k	571	(R)	GLVIEMVLGTDmTNHFQQmkAMRQLLTLQEATIDK	(Q)	m:Oxidized methionine,kUbiquitination-GG	21.9	830.78	4004.05	145.823	-50.5	B7YZV4	Calcium/calmodulin-dependent 3',5'-cyclic nucleotide phosphodiesterase 1
505	17K03_COLLAB-IT_CTRL_011.2403.2403.2	2	10.69	73.6	14500000	1.111	2	1	1	0	K92k	86	(R)	ICLDVLkDK	(W)	C:Carbamidomethylation,k:Ubiquitination-GG	14.9	610.09	1103.61	115.56	1244.2	P35128	Ubiquitin-conjugating enzyme E2 N
1929	17K03_COLLAB-IT_CTRL_013.1416.1428.0	5	7.31	67.7	3080000	1.106	1	1	1	0	M1m M10m K12k	1	(-)	mTHVNNGEVmEkEMEPTGERER	(D)	m:Oxidized methionine,kUbiquitination-GG	8.69	550.16	2603.16	143.606	-883.4	Q960V3	Trafficking kinesin-binding protein milt
1705	17K03_COLLAB-IT_CTRL_033.2670.2670.0	4	7.64	66.4	15000000	1.102	3	2	2	0	K379k K402k	378	(K)	LkASEIYSDDSGSSDWDEEEKPAGk	(R)	k:Ubiquitination-GG	16.42	743.68	2743.22	228.476	131.4	Q9W261	RNA polymerase-associated protein Rtf1
2018	17K03_COLLAB-IT_CTRL_011.2632.2632.0	5	7.21	73.4	5530000	1.1	3	2	0	2	K28k K41k	26	(R)	KSkEESDFSEDHDHSk	(K)	k:Ubiquitination-GG	16.34	427.25	1904.83	227.395	-323.9	Q9VDG2	RalA-binding protein 1
1186	17K03_COLLAB-IT_CTRL_013.3632.3632.0	5	8.48	64.4	10900000	1.099	3	1	0	1	K5k	1	(-)	MLKPkALTQVLSQANTGGVENTLLLSQEGALLAYSGYGDKDAR	(I)	k:Ubiquitination-GG	22.73	927.58	4521.37	112.505	-331.9	Q9V8I2	Ragulator complex protein LAMTOR2 homolog
532	17K03_COLLAB-IT_CTRL_021.3023.3023.0	3	10.44	74.7	26300000	1.093	2	1	0	1	K166k	152	(K)	GLSEETTTGVHNLYkMFK	(E)	k:Ubiquitination-GG	18.39	724.35	2055.02	116.014	907.8	Q27580	Adenosylhomocysteinase
1833	17K03_COLLAB-IT_CTRL_013.2610.2672.0	4	7.43	60.6	18200000	1.092	2	1	0	1	K396k	384	(R)	LHDARQIEAKAAk	(I)	k:Ubiquitination-GG	16.22	391.56	1450.81	112.406	-1047.4	Q9W5D0	Uncharacterized protein CG43867
723	17K03_COLLAB-IT_CTRL_033.4064.4064.0	5	9.56	84.4	5010000	1.088	1	0	0	0	M570m M572m	547	(K)	ITAFRDMCQEDQVALLKGGCTEMmImR	(S)	C:Carbamidomethylation,m:Oxidized methionine	25.26	648.23	3204.48	32.6408	201.1	Q24143	Nuclear hormone receptor HR96
2104	17K03_COLLAB-IT_CTRL_021.3579.3579.0	4	7.12	93.5	17800000	1.088	2	2	2	0	K232k M244m M245m K259k	230	(K)	ENkFGQPMQQQPPGmmPQMYGYQAPQQQSkIGYPR	(T)	k:Ubiquitination-GG,mOxidized methionine	21.9	1083.56	4068.9	262.321	518.3	P49762	Serine/threonine-protein kinase Doa
598	17K03_COLLAB-IT_CTRL_012.2134.2134.0	4	10.07	79.8	4580000	1.074	2	1	0	1	K926k	906	(K)	DVGLNITMVNINECLHEGKGk	(C)	C:Carbamidomethylation,k:Ubiquitination-GG	13.12	614.63	2341.16	114.334	118.7	Q9VJB6	Putative neural-cadherin 2
1080	17K03_COLLAB-IT_CTRL_013.1994.1994.0	4	8.69	63.1	6050000	1.073	2	0	0	0	M264m M284m	264	(R)	mAVDGKSIDEHNEILGMDLAmK	(Y)	m:Oxidized methionine	12.32	612.72	2417.15	30.7072	-524	Q8SWV6	Adenosine monophosphate-protein transferase FICD homolog
1977	17K03_COLLAB-IT_CTRL_023.2659.2659.0	4	7.25	71.5	5360000	1.073	1	1	1	0	M421m M441m M442m K447k	415	(R)	GGGPGGmATGPGGVAGGLGGMGMPPNmmSAQQk	(S)	m:Oxidized methionine,kUbiquitination-GG	16.35	770.31	2915.31	162.909	286.4	P21519	Neurogenic protein mastermind
1341	17K03_COLLAB-IT_CTRL_032.2695.2695.0	4	8.23	70	10500000	1.072	3	2	0	2	K551k K560k	529	(R)	AASTPARTHSSSNHSSNGNGSGkPTKTSSGGk	(L)	k:Ubiquitination-GG	16.56	821.5	3055.45	227.525	-171	Q7KQZ4	Longitudinals lacking protein, isoforms A/B/D/L
979	17K03_COLLAB-IT_CTRL_033.1767.1774.0	5	8.92	71.6	3110000	1.069	0	0	0	0	M5m	1	(-)	MNRImLLVAFAAGVVAAGRITTNQDR	(V)	m:Oxidized methionine	10.69	561.38	2788.51	14.3636	-582	Q04691	Fat-body protein 1
1149	17K03_COLLAB-IT_CTRL_031.3370.3370.0	3	8.54	63.4	11800000	1.068	2	2	2	0	M195m M203m K206k K211k	192	(R)	QNSmPSDYLFDmPVkSTMPk	(S)	m:Oxidized methionine,kUbiquitination-GG	20.93	859.67	2316.07	260.925	329.4	P22745	Protein bag-of-marbles
843	17K03_COLLAB-IT_CTRL_021.1767.1778.0	4	9.2	73.2	38100000	1.067	2	1	0	1	K112k	100	(K)	LYLQRYMEWKIAk	(T)	k:Ubiquitination-GG	10.91	464.8	1741.95	114.232	102.1	Q7K3L1	Guanylate kinase-associated protein mars
1377	17K03_COLLAB-IT_CTRL_021.4995.4995.0	5	8.15	80.6	6800000	1.067	3	0	0	0	M885m M905m	882	(K)	STNmKCLTPEKALSGQCGFMAANmYAK	(S)	C:Carbamidomethylation,m:Oxidized methionine	30.81	609.38	3009.38	33.495	494.6	P45437	Coatomer subunit beta
1920	17K03_COLLAB-IT_CTRL_013.1778.1778.0	4	7.32	75.6	15200000	1.067	2	1	0	1	K112k	100	(K)	LYLQRYMEWKIAk	(T)	k:Ubiquitination-GG	10.97	465.08	1741.95	115.352	705	Q7K3L1	Guanylate kinase-associated protein mars
1743	17K03_COLLAB-IT_CTRL_023.3889.3900.0	4	7.59	63.4	12100000	1.066	2	2	2	0	K92k K94k M100m	91	(K)	QkVkGILMLmQPCDHIIEIAFPLR	(R)	C:Carbamidomethylation,k:Ubiquitination-GG,mOxidized methionine	24.04	774.46	2850.55	244.263	58.8	P54385	Glutamate dehydrogenase, mitochondrial
306	17K03_COLLAB-IT_CTRL_033.2600.2600.3	3	13.49	86.3	14200000	1.064	2	1	0	1	K91k	78	(K)	ELTLVSQQVCPPQkQDIQLTK	(M)	C:Carbamidomethylation,k:Ubiquitination-GG	15.98	856.75	2453.31	114.929	344.9	P15372	Phosrestin-2
1216	17K03_COLLAB-IT_CTRL_023.3672.3672.0	4	8.43	61.6	14300000	1.061	1	1	1	0	M561m K575k	551	(R)	IPTAYTEAMGmHLPSSSSSSSSTGkLPPTHIHPAPQR	(V)	m:Oxidized methionine,kUbiquitination-GG	22.67	997.37	3858.89	127.568	-619.6	P54269	Homeobox protein caupolican
787	17K03_COLLAB-IT_CTRL_033.2370.2370.0	5	9.37	65.3	8280000	1.059	2	1	0	1	K163k M176m	161	(K)	QSkDQVYDSDDSDSEmSTKMTGQR	(K)	k:Ubiquitination-GG,mOxidized methionine	14.5	574.14	2738.15	128.519	-529.7	Q9VL72	SWI/SNF-related matrix-associated actin-dependent regulator of chromatin subfamily A containing DEAD/H box 1 homolog
2081	17K03_COLLAB-IT_CTRL_023.3078.3078.0	3	7.15	62.6	24800000	1.053	2	1	0	1	M1m K15k	1	(-)	mEAERDLAEDAQWKk	(I)	m:Oxidized methionine,kUbiquitination-GG	18.89	650.43	1819.86	129.411	-321.5	Q9VEN1	Filamin-A
2012	17K03_COLLAB-IT_CTRL_033.2216.2216.0	3	7.22	76.8	9830000	1.051	3	1	0	1	K109k	108	(K)	AkKLLSEMDK	(R)	k:Ubiquitination-GG	13.54	425.81	1162.65	112.765	-1001.6	Q9VAZ3	Odorant receptor 98a
39	17K03_COLLAB-IT_CTRL_021.2365.2371.0	4	19.18	92.7	18000000	1.05	3	1	0	1	K1193k	1193	(R)	kKHNDAVAEMAEQVDQLNK	(L)	k:Ubiquitination-GG	14.61	571.54	2168.08	115.062	446.2	P05661	Myosin heavy chain, muscle
453	17K03_COLLAB-IT_CTRL_013.3098.3098.0	5	11.1	84.9	12500000	1.046	0	0	0	0	M555m	537	(R)	LPYGPEVDIWSLGIMVIEmVDGEPPFFNEPPLQAMR	(R)	m:Oxidized methionine	19.32	821.35	4087.01	15.7155	-68.1	Q9VXE5	Serine/threonine-protein kinase PAK mbt
954	17K03_COLLAB-IT_CTRL_012.3224.3235.0	4	8.95	78.3	48300000	1.044	4	1	0	1	K35k M38m	20	(R)	NEHGQISKMLKPAQNkSEmEGGKPVAVVYATGSSAR	(N)	k:Ubiquitination-GG,mOxidized methionine	20.08	983.26	3799.92	130.096	14.9	Q24318	Transcription factor Dp
539	17K03_COLLAB-IT_CTRL_012.2557.2557.0	5	10.39	88.5	10400000	1.043	2	1	0	1	M217m M223m K246k	215	(K)	RQmPEEAAmQMIHAMEMMKNGSMWIVSMGQLk	(E)	m:Oxidized methionine,kUbiquitination-GG	15.79	775.3	3724.71	147.762	446.5	P54398	Fat body protein 2
1437	17K03_COLLAB-IT_CTRL_021.2550.2574.0	4	8.04	73.4	46900000	1.04	3	0	0	0	M656m M660m	648	(R)	SFPKLAAMmDEDmDKMVSYSAAIDDK	(T)	m:Oxidized methionine	15.69	736.4	2909.31	33.2706	435.3	O77086	Guanine nucleotide-releasing factor 2
1569	17K03_COLLAB-IT_CTRL_021.4961.4961.0	5	7.86	74.4	4950000	1.04	2	1	1	0	M40m K48k	39	(R)	LmCRNILMEkGTNNSFTVEQLIAEVTPK	(A)	C:Carbamidomethylation,m:Oxidized methionine,kUbiquitination-GG	30.6	674.44	3236.65	131.523	441	Q9VYX1	Enhancer of yellow 2 transcription factor
1096	17K03_COLLAB-IT_CTRL_031.3563.3563.0	4	8.66	86.8	5280000	1.039	0	0	0	0	M416m M429m	416	(R)	mTRFDHEEYTPEEmGHMDR	(Y)	m:Oxidized methionine	22.14	611.96	2410.99	33.8332	754	O46040	Protein msta, isoform A
1552	17K03_COLLAB-IT_CTRL_022.2625.2625.0	5	7.89	74.2	16200000	1.039	2	0	0	0	M852m	842	(R)	KDCISGPPIEmLQMGIGGGSGGSTK	(N)	C:Carbamidomethylation,m:Oxidized methionine	16.1	499.22	2477.18	14.8876	-444.3	P14083	Protein jim lovell
559	17K03_COLLAB-IT_CTRL_012.2945.2945.0	5	10.28	72.1	13400000	1.036	2	1	0	1	K347k	326	(K)	SEGTQAGGGLHQSVGTCTSSSkGTGTRNK	(D)	C:Carbamidomethylation,k:Ubiquitination-GG	18.24	594.16	2850.34	116.431	805.1	P91621	Protein still life, isoform SIF type 1
1711	17K03_COLLAB-IT_CTRL_022.2899.2899.0	5	7.63	61.1	10000000	1.036	1	0	0	0	M130m	112	(K)	ASEEDLNSRDSFGWTALMmAACEGATEAVSWLVQRGVQVETSDK	(S)	C:Carbamidomethylation,m:Oxidized methionine	17.72	970.33	4832.22	15.3972	-123.3	Q9V7A7	G patch domain and ankyrin repeat-containing protein 1 homolog
1361	17K03_COLLAB-IT_CTRL_022.3123.3123.0	4	8.19	69	31800000	1.032	1	0	0	0	M285m	267	(K)	EDWSEDILNAKQCVCNNTmSGAM	(-)	C:Carbamidomethylation,m:Oxidized methionine	19.06	672.42	2673.11	13.5534	-908.8	Q9V813	S-methyl-5'-thioadenosine phosphorylase
792	17K03_COLLAB-IT_CTRL_022.2771.2771.0	4	9.34	78	78100000	1.031	3	1	0	1	M965m K977k	952	(R)	NIEVTVQPEKLICmCKYDNLSAEIWk	(R)	C:Carbamidomethylation,m:Oxidized methionine,kUbiquitination-GG	16.98	828.48	3181.57	129.325	-215.3	Q9VYS4	Poly(A) RNA polymerase gld-2 homolog B
948	17K03_COLLAB-IT_CTRL_012.3196.3196.0	3	8.96	63.6	11800000	1.031	0	0	0	0	M554m M560m M566m M569m M572m M573m	548	(K)	EDGAPAmPGMGGmGGMGGmGGmGGmm	(-)	m:Oxidized methionine	19.86	809.29	2331.85	94.0069	-809	O02649	60 kDa heat shock protein, mitochondrial
432	17K03_COLLAB-IT_CTRL_021.1850.1850.0	4	11.48	62.4	9580000	1.03	1	0	0	0	M234m	211	(K)	YAEVDFVFFNRVPKVGSQSLMELmAR	(L)	m:Oxidized methionine	11.44	763.34	3033.53	16.8057	265.8	Q86BJ3	Heparan sulfate 2-O-sulfotransferase pipe
1803	17K03_COLLAB-IT_CTRL_011.2540.2540.2	2	7.48	64.7	8790000	1.027	3	1	0	1	K280k	271	(K)	CGNKGHYANkCPK	(G)	C:Carbamidomethylation,k:Ubiquitination-GG	15.76	825.15	1533.7	115.588	936.7	Q9VPT8	Cleavage and polyadenylation specificity factor subunit 4
2128	17K03_COLLAB-IT_CTRL_021.3313.3313.0	5	7.09	64.9	12900000	1.022	3	1	0	1	K365k	350	(R)	TFECGPGKGLVQVLEkVNAK	(A)	C:Carbamidomethylation,k:Ubiquitination-GG	20.2	458.3	2174.16	113.307	-321.7	Q8T3L6	Probable malonyl-CoA-acyl carrier protein transacylase, mitochondrial
839	17K03_COLLAB-IT_CTRL_033.2641.2719.0	3	9.21	67.6	36900000	1.01	3	1	0	1	M318m M323m K324k	313	(K)	ALLKDmELSKmk	(D)	m:Oxidized methionine,kUbiquitination-GG	16.24	519.05	1406.78	148.361	1497.1	Q9VH20	TATA box-binding protein-associated factor RNA polymerase I subunit B
1541	17K03_COLLAB-IT_CTRL_022.3623.3623.0	5	7.9	62.2	15800000	1.007	2	1	0	1	M1054m M1061m K1063k	1038	(K)	GQERNLPAVPATLANImQAPKISmHk	(R)	m:Oxidized methionine,kUbiquitination-GG	22.28	593.19	2815.51	146.414	128.7	Q6AWG9	Uncharacterized protein CG5098
1058	17K03_COLLAB-IT_CTRL_022.2280.2280.0	5	8.75	62.4	7430000	1.003	1	0	0	0	M531m	518	(R)	SDIIFTHKYGANImQALIDSMALSDR	(V)	m:Oxidized methionine	14.05	585.6	2910.45	13.5221	-845.7	Q8IGJ0	Protein EFR3 homolog cmp44E
666	17K03_COLLAB-IT_CTRL_032.1995.1995.0	3	9.78	69.6	8600000	1.001	3	1	0	1	K52k	31	(R)	AASEVKLLLLGAGESGKSTIVk	(Q)	k:Ubiquitination-GG	12.22	762.06	2171.26	112.901	-500	P20353	G protein alpha i subunit
98	17K03_COLLAB-IT_CTRL_032.2365.2379.0	3	17.67	96.4	15800000	1	2	1	0	1	K1302k	1289	(R)	QLEEAESQVSQLSkIK	(I)	k:Ubiquitination-GG	14.55	644.5	1816.96	114.52	247.2	P05661	Myosin heavy chain, muscle
985	17K03_COLLAB-IT_CTRL_022.3019.3019.0	3	8.91	60.2	12200000	1	2	1	0	1	M75m K95k	69	(R)	IRLANImIALTAVGCAIMVYSGKQAAk	(K)	C:Carbamidomethylation,m:Oxidized methionine,kUbiquitination-GG	18.43	998.77	2863.57	130.724	229	Q9VW12	UPF0389 protein CG9231
626	17K03_COLLAB-IT_CTRL_013.3647.3647.0	4	9.94	81.9	7740000	0.992	3	1	0	1	K1074k	1054	(R)	EGTKPGNYFNNILLSLPLPQkTSSPLAK	(A)	k:Ubiquitination-GG	22.82	786.79	3027.65	116.487	777.3	Q9VNZ8	Alsin homolog
1443	17K03_COLLAB-IT_CTRL_012.3725.3725.0	4	8.03	66.5	4880000	0.978	3	1	0	1	M475m K483k M488m	460	(R)	GGILADDMGLGKTLTmISSVLACkNGQEmSEGK	(D)	C:Carbamidomethylation,m:Oxidized methionine,kUbiquitination-GG	23.32	890.24	3411.66	146.275	68.2	P34739	Transcription termination factor 2
1385	17K03_COLLAB-IT_CTRL_013.3560.3560.0	5	8.14	70	22700000	0.974	2	1	1	0	M1m M13m K36k	1	(-)	mHHHQNLGDAAAmNGMIPPYEAMAMYEQPKPRFIFkMPR	(V)	m:Oxidized methionine,kUbiquitination-GG	22.28	941.59	4556.15	147.768	368.9	Q24039	Protein brother
845	17K03_COLLAB-IT_CTRL_033.1852.1852.0	4	9.2	67	4380000	0.956	0	0	0	0	M249m M255m	239	(R)	ALVMERLQTFmPPSVMmSPR	(R)	m:Oxidized methionine	11.22	589.55	2321.16	34.0145	859.7	Q7K0L4	WD repeat-containing protein 26 homolog
2068	17K03_COLLAB-IT_CTRL_012.4091.4091.0	4	7.16	94	8840000	0.949	2	1	0	1	K358k	351	(K)	SPLEKAQkLAVLLGLPQPPTR	(V)	k:Ubiquitination-GG	25.63	593.14	2256.34	113.194	-358.1	Q9VN25	Eukaryotic translation initiation factor 3 subunit A
2169	17K03_COLLAB-IT_CTRL_023.3313.3313.2	2	7.04	67.3	9010000	0.946	0	0	0	0	M294m	294	(K)	mQTNLSMARDR	(L)	m:Oxidized methionine	20.39	668.93	1322.63	14.2224	-1325.9	Q8I0P1	Spastin
2171	17K03_COLLAB-IT_CTRL_031.2634.2634.2	2	7.04	75.7	13100000	0.936	3	2	0	2	K918k K923k	917	(K)	QkAIALkGNK	(K)	k:Ubiquitination-GG	16.27	650.06	1070.67	228.445	276.2	Q9V496	Apolipophorins
644	17K03_COLLAB-IT_CTRL_022.2894.2894.0	4	9.86	82.9	13400000	0.932	2	1	0	1	M1122m K1143k	1119	(K)	NVKmLYISYMSQYVVTVSEAQLLDk	(E)	m:Oxidized methionine,kUbiquitination-GG	17.68	764.48	2922.5	132.399	772.9	Q9VUY8	WASH complex subunit homolog 5
164	17K03_COLLAB-IT_CTRL_011.3806.3824.0	4	16.12	86.4	19000000	0.92	2	1	0	1	K1509k	1500	(R)	ENKNLADEVkDLLDQIGEGGR	(N)	k:Ubiquitination-GG	23.9	607.57	2313.17	114.09	19.4	P05661	Myosin heavy chain, muscle
1127	17K03_COLLAB-IT_CTRL_032.2367.2392.0	3	8.6	79.2	27900000	0.906	4	1	0	1	K93k	80	(R)	EGTQAKPKKAVASk	(-)	k:Ubiquitination-GG	14.57	519.1	1442.83	112.453	-1022.3	Q9VXX8	Probable 60S ribosomal protein L37-A
594	17K03_COLLAB-IT_CTRL_032.2942.2942.0	3	10.09	94.4	9110000	0.903	2	1	0	1	K1211k	1195	(K)	HNDAVAEMAEQVDQLNkLK	(A)	k:Ubiquitination-GG	18.11	756.2	2153.07	113.52	-230.8	P05661	Myosin heavy chain, muscle
2124	17K03_COLLAB-IT_CTRL_033.2385.2385.0	5	7.1	100	3950000	0.866	3	1	0	1	M1m M15m K41k	1	(-)	mEASAAKITPMASSmSASGSTNSPSSEKMNYALQVALQTIk	(E)	m:Oxidized methionine,kUbiquitination-GG	14.59	873.34	4219.04	143.632	-550.3	Q9V9Y9	Protein spindle-F
1204	17K03_COLLAB-IT_CTRL_023.1870.1870.0	5	8.46	63.1	11400000	0.86	2	1	0	1	K271k	237	(K)	CIPVVRGIGVYQDAINLCIEKAALGHWIHVFPEGk	(V)	C:Carbamidomethylation,k:Ubiquitination-GG	11.42	815.38	3960.08	112.793	-306.8	Q9V6G5	Tafazzin homolog
330	17K03_COLLAB-IT_CTRL_023.3618.3618.0	4	12.97	68.7	12600000	0.821	2	1	0	1	K183k	160	(K)	VINDNFEIVEGLMTTVHATTATQkTVDGPSGK	(L)	k:Ubiquitination-GG	22.33	873.21	3373.69	116.124	596.3	P07486	Glyceraldehyde-3-phosphate dehydrogenase 1
1059	17K03_COLLAB-IT_CTRL_031.2705.2705.0	3	8.75	69.2	9500000	0.815	3	2	0	2	K1169k K1177k	1159	(K)	AAVTVAVTGDkIAKDEEEk	(L)	k:Ubiquitination-GG	16.71	734.75	1974.04	228.196	50.2	P55824	Probable ubiquitin carboxyl-terminal hydrolase FAF
1141	17K03_COLLAB-IT_CTRL_021.3148.3148.0	4	8.55	77.5	27200000	0.809	2	1	0	1	K398k	386	(K)	LCSLYENDCIFDkFECCWNGK	(D)	C:Carbamidomethylation,k:Ubiquitination-GG	19.17	718.29	2758.14	111.998	-712.6	P36872	Protein phosphatase PP2A 55 kDa regulatory subunit
1070	17K03_COLLAB-IT_CTRL_031.2686.2686.0	5	8.72	64.7	11300000	0.806	3	2	0	2	M199m K206k K225k	194	(R)	FYSGTmSGENAFkLSECLDEHTLNTLTPTIIkGYPNTYTFTK	(V)	C:Carbamidomethylation,m:Oxidized methionine,kUbiquitination-GG	16.59	1007.72	4790.3	244.27	37.7	Q8MS59	Fatty acyl-CoA reductase wat
1766	17K03_COLLAB-IT_CTRL_012.3559.3559.0	4	7.55	76.6	7780000	0.795	3	1	0	1	K37k	12	(R)	LAAPKAWMLDKLGGVFAPRPSTGPHk	(L)	k:Ubiquitination-GG	22.27	715.08	2745.5	111.796	-786.4	P41042	40S ribosomal protein S4
1291	17K03_COLLAB-IT_CTRL_033.1917.1917.0	5	8.31	72.5	3260000	0.789	0	0	0	0	M205m	200	(K)	RLHHLmQDNMSGFEQR	(L)	m:Oxidized methionine	11.63	403.45	1998.94	14.2824	-850.6	O61643	Inhibin beta chain
1509	17K03_COLLAB-IT_CTRL_012.2913.2913.0	5	7.93	83.3	8900000	0.781	4	1	0	1	K950k	933	(K)	KKPSQVMNFDSEEEDTAkPMSYDEK	(R)	k:Ubiquitination-GG	18.04	610.57	2933.32	115.503	478.9	P13709	Homeotic protein female sterile
1474	17K03_COLLAB-IT_CTRL_022.3468.3468.0	5	7.99	67.8	9430000	0.757	3	1	0	1	K120k	97	(R)	ILSLTAANQLILWEPVGATLLPIkTLPFDGKLK	(K)	k:Ubiquitination-GG	21.27	738.24	3574.1	113.069	-264.2	P08111	Lethal(2) giant larvae protein
109	17K03_COLLAB-IT_CTRL_023.1943.1978.0	3	17.36	95.7	17700000	0.75	3	1	0	1	K216k	204	(K)	KPLPDNVSVVEPkEEK	(I)	k:Ubiquitination-GG	11.88	641.37	1807.98	114.115	37.7	Q06559	40S ribosomal protein S3
1505	17K03_COLLAB-IT_CTRL_031.5744.5744.0	5	7.94	81.7	5250000	0.75	1	0	0	0	M435m M437m M442m	415	(R)	GGGPGGMATGPGGVAGGLGGmGmPPNMmSAQQK	(S)	m:Oxidized methionine	35.91	593.21	2915.31	46.712	-429.7	P21519	Neurogenic protein mastermind
987	17K03_COLLAB-IT_CTRL_031.3578.3578.0	4	8.91	85.4	5400000	0.739	3	2	0	2	K66k M77m K84k	51	(K)	AMELRFVGGVYGGNIkPTQFLCLTLKmLQIQPEk	(D)	C:Carbamidomethylation,k:Ubiquitination-GG,mOxidized methionine	22.24	1031.59	3880.07	243.27	-196.7	Q7JVL3	Pre-mRNA-splicing factor 38
1465	17K03_COLLAB-IT_CTRL_011.2360.2360.0	3	8	61	8700000	0.734	4	1	0	1	M310m M315m K316k	306	(R)	KPDTmEIQQmkAQAKEEK	(Q)	m:Oxidized methionine,kUbiquitination-GG	14.63	759.8	2133.07	144.318	-753.1	Q24564	Moesin/ezrin/radixin homolog 2
1925	17K03_COLLAB-IT_CTRL_032.1718.1725.0	5	7.32	63.8	6600000	0.734	3	1	0	1	K1209k	1199	(K)	LTTIDGIDLYkFHAKIDDQIDK	(A)	k:Ubiquitination-GG	10.46	536.16	2562.34	114.426	143.1	Q9NHE5	Calcium-dependent secretion activator
2006	17K03_COLLAB-IT_CTRL_032.2206.2206.0	3	7.23	95.4	6320000	0.728	2	1	0	1	K101k	98	(R)	LYDkQGNGYIPTSCLK	(E)	C:Carbamidomethylation,k:Ubiquitination-GG	13.58	657.88	1856.92	114.704	335.5	P47948	Troponin C, isoform 2
1623	17K03_COLLAB-IT_CTRL_023.3675.3675.0	5	7.76	66.2	21000000	0.71	0	0	0	0	M1094m M1099m M1116m	1086	(R)	QYELASSImRSSVmSPTSMEESTSQIYSPSmTRSCPSMR	(E)	C:Carbamidomethylation,m:Oxidized methionine	22.69	894.66	4419.97	49.3017	294.7	Q9VB25	Kinesin-like protein Klp98A
1859	17K03_COLLAB-IT_CTRL_023.1788.1796.0	4	7.4	74.6	16800000	0.71	3	2	1	1	K476k M483m K484k	472	(R)	EEQEkMKAQETmk	(S)	k:Ubiquitination-GG,mOxidized methionine	10.91	464.73	1609.76	246.142	1110.7	P29555	Homeobox protein abdominal-A
1827	17K03_COLLAB-IT_CTRL_012.2188.2188.0	5	7.44	85	7450000	0.704	2	2	2	0	K257k M269m K279k	257	(K)	kNMANLSDIVEQmRQLDANYASk	(D)	k:Ubiquitination-GG,mOxidized methionine	13.48	577.94	2639.29	246.379	796.5	E1JH25	Protein telomere ends associated
1286	17K03_COLLAB-IT_CTRL_011.1725.1725.0	4	8.31	69.3	2880000	0.702	3	1	0	1	M369m K375k	369	(K)	mRANNQkPYTPKEGK	(M)	m:Oxidized methionine,kUbiquitination-GG	10.62	473.49	1761.91	129.032	-532.1	Q00963	Spectrin beta chain
1624	17K03_COLLAB-IT_CTRL_022.3143.3143.0	5	7.76	73.5	14000000	0.694	2	1	1	0	M217m M223m M225m M231m M232m M237m K246k	215	(K)	RQmPEEAAmQmIHAMEmmKNGSmWIVSMGQLk	(E)	m:Oxidized methionine,kUbiquitination-GG	19.22	788.02	3724.71	211.362	342.8	P54398	Fat body protein 2
1367	17K03_COLLAB-IT_CTRL_021.5034.5034.0	4	8.18	89.3	8610000	0.685	2	1	0	1	K358k	351	(K)	SPLEKAQkLAVLLGLPQPPTR	(V)	k:Ubiquitination-GG	31.06	593.12	2256.34	113.114	-391.9	Q9VN25	Eukaryotic translation initiation factor 3 subunit A
971	17K03_COLLAB-IT_CTRL_021.4670.4670.0	4	8.93	72.7	8710000	0.674	3	1	0	1	M2004m M2017m K2025k	2000	(R)	QTWFmVSLAATSIVIIVmVIAVLCVkSKSYK	(Y)	C:Carbamidomethylation,m:Oxidized methionine,kUbiquitination-GG	28.76	908.36	3485.93	144.484	-426.5	O97394	Protein sidekick
1621	17K03_COLLAB-IT_CTRL_021.3556.3556.0	4	7.76	64.2	16500000	0.667	4	1	0	1	K1229k M1235m	1211	(R)	LKKPPMPAPSEKPPPIPSkPIPSRmSPIPPR	(K)	k:Ubiquitination-GG,mOxidized methionine	21.74	875.32	3367.91	130.347	88.5	Q07436	Protein expanded
1075	17K03_COLLAB-IT_CTRL_031.2526.2526.0	5	8.71	74.6	8950000	0.638	2	1	0	1	M1437m M1447m K1455k	1432	(K)	TEQLEmEEEESASNLmSEISDEAkGDDLVEHNNSK	(G)	m:Oxidized methionine,kUbiquitination-GG	15.6	817.93	3937.71	147.913	460.3	Q3LHL9	Protein winged eye
2117	17K03_COLLAB-IT_CTRL_011.2780.2780.0	5	7.1	78.8	5710000	0.635	1	0	0	0	M138m	128	(K)	FLWNKFEGGLmRMIVMGLNITICTR	(E)	C:Carbamidomethylation,m:Oxidized methionine	17.3	604.03	3000.54	15.5766	-138.7	P27716	Innexin inx1
460	17K03_COLLAB-IT_CTRL_021.2912.2912.0	5	11.06	72.7	26800000	0.625	2	1	0	1	K960k	940	(K)	FAQARAGEFSTLLSPLEPEYkQVLQK	(Y)	k:Ubiquitination-GG	17.72	614	2950.57	115.404	443.8	Q9XZU1	Exportin-2
894	17K03_COLLAB-IT_CTRL_033.2583.2583.0	5	9.08	64.1	7640000	0.621	3	1	0	1	K2617k	2588	(K)	SAVTSEKSVSRPLSVASDHEAAVAIEDDAkSSISPK	(D)	k:Ubiquitination-GG	15.88	757.68	3668.86	115.51	387.5	Q9W596	Microtubule-associated protein futsch
2047	17K03_COLLAB-IT_CTRL_023.4037.4037.0	5	7.18	65.7	9310000	0.608	2	0	0	0	M799m	773	(R)	AEVLKISMIFVGIGLMAGLGNMLQTYmFTTAGVKMTTR	(L)	m:Oxidized methionine	24.97	822.97	4094.14	16.6826	167.3	Q00449	Multidrug resistance protein homolog 49
1901	17K03_COLLAB-IT_CTRL_011.2472.2472.0	5	7.34	90.1	11700000	0.577	1	0	0	0	M421m M441m M442m	415	(R)	GGGPGGmATGPGGVAGGLGGMGMPPNmmSAQQK	(S)	m:Oxidized methionine	15.33	593.1	2915.31	46.162	-615.5	P21519	Neurogenic protein mastermind
972	17K03_COLLAB-IT_CTRL_021.2980.2980.0	5	8.93	62.9	24000000	0.576	1	1	1	0	M84m K86k M98m M102m	79	(K)	RSFYTmTkPTPPCQSQEPEmCLLmASVTRAMR	(H)	C:Carbamidomethylation,m:Oxidized methionine,kUbiquitination-GG	18.12	793.73	3804.78	159.839	-552.1	Q9VFK3	Male-specific protein scotti
1398	17K03_COLLAB-IT_CTRL_021.3523.3523.0	5	8.11	65.2	24000000	0.57	2	1	0	1	M318m K340k	296	(R)	RKSTSGWSIGNILLDFTGGTLSmLQMILNAHNYDDWVSIFGDPTk	(F)	m:Oxidized methionine,kUbiquitination-GG	21.54	1027.04	4999.48	131.695	323	Q9VCR7	Cystinosin homolog
1532	17K03_COLLAB-IT_CTRL_022.5588.5588.0	5	7.91	71.6	4240000	0.558	4	2	1	1	K362k K364k	351	(K)	QFPSNGKDSTLkPkSYEILHDEELPDVK	(D)	k:Ubiquitination-GG	34.63	689.36	3214.63	228.144	17	A1Z7A8	Coilin
1802	17K03_COLLAB-IT_CTRL_033.1967.1967.0	5	7.49	62.7	2270000	0.555	4	1	0	1	K683k M715m	679	(K)	QEDPkTLKSPQKPAPPADQASTSSASTSGSGSGSSSmQPPK	(R)	k:Ubiquitination-GG,mOxidized methionine	11.95	835.58	4041.93	131.94	455.8	Q9NJG9	Polycomb protein Su(z)12
305	17K03_COLLAB-IT_CTRL_031.3651.3651.0	4	13.5	88.6	13400000	0.554	3	1	0	1	K1081k	1054	(R)	EGTKPGNYFNNILLSLPLPQKTSSPLAk	(A)	k:Ubiquitination-GG	22.7	786.79	3027.65	116.487	777.3	Q9VNZ8	Alsin homolog
444	17K03_COLLAB-IT_CTRL_021.3587.3587.0	4	11.27	75.3	15200000	0.553	3	2	0	2	K119k K122k	96	(K)	LLSGVTIAQGGVLPNIQAVLLPKkTEk	(K)	k:Ubiquitination-GG	21.95	754.8	2787.67	228.507	139.8	P84051	Histone H2A
1187	17K03_COLLAB-IT_CTRL_013.2234.2234.0	5	8.48	60.4	7280000	0.551	3	1	0	1	M803m K804k	773	(K)	QPFQELPLQPSYSVSEIGAQQYDQFGKIFTmkLQYIFYK	(E)	m:Oxidized methionine,kUbiquitination-GG	13.86	959.12	4660.35	131.224	247.5	Q24212	Protein stoned-B
759	17K03_COLLAB-IT_CTRL_023.2587.2587.2	2	9.46	75.3	9110000	0.539	2	1	0	1	K251k	238	(K)	VIQFLAYVAASKPk	(G)	k:Ubiquitination-GG	15.92	824.75	1534.9	113.594	-272.6	Q99323	Myosin heavy chain, non-muscle
609	17K03_COLLAB-IT_CTRL_021.3334.3334.0	4	10.01	88.2	18900000	0.537	4	1	0	1	M754m K757k	727	(K)	DDVLDEDDDDDCVEQKTSGSGCLKKPGmDLk	(R)	C:Carbamidomethylation,m:Oxidized methionine,kUbiquitination-GG	20.35	904.07	3484.5	128.755	-355.2	P29617	Homeobox protein prospero
1639	17K03_COLLAB-IT_CTRL_012.2071.2078.3	3	7.74	64.9	11400000	0.536	2	1	0	1	M2893m K2896k	2884	(R)	YDMELLASDmGGkKASVAVR	(V)	m:Oxidized methionine,kUbiquitination-GG	12.72	758.24	2141.07	131.632	701.7	Q24292	Protein dachsous
49	17K03_COLLAB-IT_CTRL_033.2793.2799.0	3	18.85	94.6	43300000	0.535	2	1	0	1	K332k	317	(R)	LLTVNEEALDEVDLEkK	(R)	k:Ubiquitination-GG	17.2	691.64	1958.03	114.873	400.3	C0HK92	Uncharacterized protein CG45076
156	17K03_COLLAB-IT_CTRL_012.2791.2801.0	3	16.28	90.4	25200000	0.53	2	1	0	1	K332k	317	(R)	LLTVNEEALDEVDLEkK	(R)	k:Ubiquitination-GG	17.28	691.3	1958.03	113.853	-91.9	C0HK92	Uncharacterized protein CG45076
1325	17K03_COLLAB-IT_CTRL_023.3242.3242.0	4	8.25	76.1	73200000	0.525	4	1	0	1	K35k M38m	20	(R)	NEHGQISKMLKPAQNkSEmEGGKPVAVVYATGSSAR	(N)	k:Ubiquitination-GG,mOxidized methionine	19.9	983.25	3799.92	130.056	4.7	Q24318	Transcription factor Dp
1370	17K03_COLLAB-IT_CTRL_031.4127.4127.0	5	8.17	66.3	8470000	0.504	1	0	0	0	M246m M256m	220	(R)	SQSASSWITNPDVGHYAQLTLEATAImWSAVAKWLDmGCMTR	(Q)	C:Carbamidomethylation,m:Oxidized methionine	25.71	944.11	4684.21	32.3118	68.3	Q9VXG8	Serine/threonine-protein kinase ATR
495	17K03_COLLAB-IT_CTRL_011.2683.2683.0	3	10.78	71.6	6140000	0.503	1	0	0	0	M141m	117	(K)	GDVPNGCAAYGFVVEGTRMFVFGGmIEYGK	(Y)	C:Carbamidomethylation,m:Oxidized methionine	16.66	1082.71	3228.49	17.6203	500.7	Q9V4C8	Host cell factor
100	17K03_COLLAB-IT_CTRL_011.1962.2001.0	3	17.57	88.2	23100000	0.5	3	1	0	1	K216k	204	(K)	KPLPDNVSVVEPkEEK	(I)	k:Ubiquitination-GG	12.1	641.36	1807.98	114.085	22.1	Q06559	40S ribosomal protein S3
112	17K03_COLLAB-IT_CTRL_012.2838.2852.0	4	17.31	68	11300000	0.5	3	1	0	1	K1615k	1615	(K)	kKLEADINELEIALDHANK	(A)	k:Ubiquitination-GG	17.57	570.31	2164.16	114.057	6.3	P05661	Myosin heavy chain, muscle
705	17K03_COLLAB-IT_CTRL_012.2388.2388.0	3	9.61	66.2	8760000	0.5	2	1	0	1	K212k	198	(R)	GAAQNIIPAATGAAkAVGK	(V)	k:Ubiquitination-GG	14.74	608.53	1708.97	114.605	308.2	P07486	Glyceraldehyde-3-phosphate dehydrogenase 1
742	17K03_COLLAB-IT_CTRL_023.2085.2085.0	5	9.51	64.2	7240000	0.5	3	1	0	1	K522k M527m	506	(K)	HRVNEEQIYCYCGKPGkFDHNmLQCCK	(C)	C:Carbamidomethylation,k:Ubiquitination-GG,mOxidized methionine	12.77	721.16	3471.53	130.244	57.2	Q24459	Polycomb protein Pcl
1369	17K03_COLLAB-IT_CTRL_023.2972.2972.0	3	8.17	67.5	28900000	0.5	2	1	0	1	K1291k	1280	(K)	IETNDLDENGEkAEK	(W)	k:Ubiquitination-GG	18.24	606.37	1704.79	112.303	-957.4	A0A1F4	Protein eyes shut
1655	17K03_COLLAB-IT_CTRL_011.3072.3072.0	4	7.71	65.1	6430000	0.5	3	1	0	1	K1528k	1519	(K)	LQLATEESYkDPANIQSKHQK	(H)	k:Ubiquitination-GG	19.15	636.84	2428.25	116.091	805.1	P13395	Spectrin alpha chain
1787	17K03_COLLAB-IT_CTRL_031.1808.1808.0	4	7.52	71.8	3010000	0.5	1	0	0	0	M1775m	1767	(K)	VILRYLVImSGMAPTELLPYAKR	(V)	m:Oxidized methionine	11.12	662.86	2634.49	13.9308	-779.4	Q9VT28	Protein furry
1812	17K03_COLLAB-IT_CTRL_033.3156.3156.0	5	7.48	76.7	3450000	0.5	1	1	1	0	K2470k M2491m	2459	(R)	VATVTTTNNNNkSQVSQNNSNSLNVRANANSQmNMSPTGQPVQQQSPLR	(G)	k:Ubiquitination-GG,mOxidized methionine	19.46	1081.19	5269.54	132.379	433.4	Q24270	Voltage-dependent calcium channel type D subunit alpha-1
2058	17K03_COLLAB-IT_CTRL_023.5034.5034.0	5	7.17	88.9	2940000	0.5	2	1	0	1	K362k	351	(R)	CITCENVFPHAkMAKYQDFALNTINNR	(I)	C:Carbamidomethylation,k:Ubiquitination-GG	31.25	674.87	3255.55	114.771	216.1	O46040	Protein msta, isoform A
115	17K03_COLLAB-IT_CTRL_011.3711.3730.0	3	17.24	92.1	8160000	0.495	2	1	0	1	K238k	226	(R)	GVVDAVNALEPIkAWIEK	(R)	k:Ubiquitination-GG	23.3	689.69	1952.09	114.97	448.6	P41043	Glutathione S-transferase S1
749	17K03_COLLAB-IT_CTRL_013.2048.2048.0	3	9.49	63.2	13300000	0.478	3	1	0	1	K47k	38	(K)	TDPDASKSEkENLQNQQPK	(V)	k:Ubiquitination-GG	12.66	758.34	2157.04	115.964	845	Q9VUM0	Probable DNA mismatch repair protein Msh6
1707	17K03_COLLAB-IT_CTRL_013.2440.2440.0	5	7.63	83.3	4430000	0.478	2	1	0	1	K469k	447	(R)	FFADNGRRNWIKPENLLTFAGLk	(A)	k:Ubiquitination-GG	15.15	565.3	2707.45	115.024	347.7	Q8MT36	Probable histone-lysine N-methyltransferase Mes-4
933	17K03_COLLAB-IT_CTRL_013.1892.1892.0	5	8.99	74.6	10800000	0.456	1	0	0	0	M421m M435m M442m	415	(R)	GGGPGGmATGPGGVAGGLGGmGMPPNMmSAQQK	(S)	m:Oxidized methionine	11.68	592.99	2915.31	45.612	-801.4	P21519	Neurogenic protein mastermind
1903	17K03_COLLAB-IT_CTRL_023.3022.3022.0	4	7.34	83	25500000	0.45	1	1	1	0	M864m K874k	855	(R)	VLIFSQMVRmLDVLADYLQk	(R)	m:Oxidized methionine,kUbiquitination-GG	18.55	628.82	2382.29	129.966	-28.7	Q7KU24	Chromodomain-helicase-DNA-binding protein 1
1520	17K03_COLLAB-IT_CTRL_013.2680.2680.0	4	7.92	82.5	8160000	0.447	0	0	0	0	M416m M432m	416	(R)	mTRFDHEEYTPEEMGHmDR	(Y)	m:Oxidized methionine	16.66	611.55	2410.99	32.1932	83.3	O46040	Protein msta, isoform A
544	17K03_COLLAB-IT_CTRL_011.2102.2102.0	4	10.38	62.6	14200000	0.403	1	1	1	0	M977m K979k	964	(R)	NVNVFIDEWIWMVmSkATAEMVMR	(T)	m:Oxidized methionine,kUbiquitination-GG	12.98	758.01	2900.4	128.622	-467.6	Q9W1I2	Benign gonial cell neoplasm protein
1068	17K03_COLLAB-IT_CTRL_013.3004.3004.0	5	8.72	63.2	10200000	0.402	4	2	0	2	K210k K219k	185	(R)	TITAFSKGRTALHPNELTKPIPSSEkPAATVATPk	(D)	k:Ubiquitination-GG	18.71	778.71	3660.01	229.509	365.9	Q9W4I5	Protein Flattop homolog
13	17K03_COLLAB-IT_CTRL_032.1980.1980.3	3	20.75	100	14100000	0.385	3	1	0	1	K219k	204	(K)	KPLPDNVSVVEPKEEk	(I)	k:Ubiquitination-GG	12.12	641.37	1807.98	114.115	37.7	Q06559	40S ribosomal protein S3
1489	17K03_COLLAB-IT_CTRL_012.3449.3449.0	5	7.96	65.2	5690000	0.377	0	0	0	0	M692m	676	(R)	QRNIFWSVSLAVFLLSmFDPGMVNIREEYFPTR	(Y)	m:Oxidized methionine	21.56	796.92	3963.01	17.5625	393.8	Q9VWR8	C-mannosyltransferase dpy-19 homolog
1940	17K03_COLLAB-IT_CTRL_023.3235.3235.0	4	7.3	65.3	39100000	0.336	1	0	0	0	M448m	441	(R)	ISRMMMHmPSGGMSSSTMGGSVYAGAGNVPPYK	(R)	m:Oxidized methionine	19.86	848.64	3376.51	15.0308	-284.3	Q960V3	Trafficking kinesin-binding protein milt
1882	17K03_COLLAB-IT_CTRL_021.4058.4058.0	4	7.37	71.9	6500000	0.334	3	2	0	2	K145k K155k	137	(R)	IVDVIDIVkDQLWGGDYVkEEDPK	(H)	k:Ubiquitination-GG	24.91	751.13	2773.43	228.069	-5.7	P43125	Protein retinal degeneration B
537	17K03_COLLAB-IT_CTRL_023.3082.3082.0	5	10.4	63.7	24200000	0.333	1	0	0	0	M104m M107m M124m	96	(K)	GPRYSLASmVVmGFVAAILSTVTVAGNVmVMISFK	(I)	m:Oxidized methionine	18.92	739.67	3646.92	47.3977	-158.9	P16395	Muscarinic acetylcholine receptor DM1
1862	17K03_COLLAB-IT_CTRL_031.4371.4371.0	5	7.4	75.3	3880000	0.325	0	0	0	0	M154m M158m M171m	145	(R)	ITNDAREDEmEENmGQVNTMIGNLRNmALDMGSELENQNR	(Q)	m:Oxidized methionine	27.25	926.89	4583.03	47.3885	-128.8	P36975	Synaptosomal-associated protein 25
176	17K03_COLLAB-IT_CTRL_033.3819.3836.0	4	15.81	88.6	16100000	0.312	2	1	0	1	K1509k	1500	(R)	ENKNLADEVkDLLDQIGEGGR	(N)	k:Ubiquitination-GG	23.7	607.59	2313.17	114.17	52.4	P05661	Myosin heavy chain, muscle
42	17K03_COLLAB-IT_CTRL_022.1949.1988.0	3	19.12	96.4	25000000	0.311	3	1	0	1	K219k	204	(K)	KPLPDNVSVVEPKEEk	(I)	k:Ubiquitination-GG	11.94	641.36	1807.98	114.085	22.1	Q06559	40S ribosomal protein S3
878	17K03_COLLAB-IT_CTRL_011.3873.3879.0	5	9.11	63.1	4140000	0.269	2	2	2	0	M325m K330k K338k	314	(R)	NCNSVCLITMPmHLIAkYDASLVPk	(I)	C:Carbamidomethylation,m:Oxidized methionine,kUbiquitination-GG	24.32	624.24	2875.43	241.737	-751.8	Q9VMQ7	Putative elongator complex protein 4
1365	17K03_COLLAB-IT_CTRL_013.2545.2545.0	5	8.18	76.2	7350000	0.257	3	2	0	2	K283k M292m K297k	274	(R)	VSEAFVTSGkTIEELEKEmLNGQk	(L)	k:Ubiquitination-GG,mOxidized methionine	15.81	582.97	2667.36	243.466	-211.1	P13706	Glycerol-3-phosphate dehydrogenase [NAD(+)], cytoplasmic
1515	17K03_COLLAB-IT_CTRL_032.2440.2440.0	3	7.93	68.9	10400000	0.214	0	0	0	0	M152m M153m M160m M168m	150	(R)	APmmGAPPPGmIPGGMPSmPGNMGR	(G)	m:Oxidized methionine	15.01	835.35	2439.09	64.9422	384.4	Q05856	Small nuclear ribonucleoprotein-associated protein B
1344	17K03_COLLAB-IT_CTRL_022.1435.1440.0	5	8.22	74.1	2940000	0.188	1	1	1	0	M1m M10m K12k	1	(-)	mTHVNNGEVmEkEMEPTGERER	(D)	m:Oxidized methionine,kUbiquitination-GG	8.73	550.31	2603.16	144.356	-610.2	Q960V3	Trafficking kinesin-binding protein milt
1728	17K03_COLLAB-IT_CTRL_021.5010.5010.0	5	7.6	60.3	4770000	0.167	1	0	0	0	M1246m M1255m	1228	(R)	GDCIKPTVSLLPVSSGGAmTVSMTCSGmLGVR	(A)	C:Carbamidomethylation,m:Oxidized methionine	30.9	661.23	3268.59	33.5342	467.7	A8JQ65	Diacylglycerol kinase eta
643	17K03_COLLAB-IT_CTRL_013.4229.4229.0	5	9.86	67.7	12600000	0.148	4	2	0	2	K354k K374k	347	(K)	YTAKPLVkTIFEGGMATCFAYGQTGSGkTHTMGGEFNGK	(V)	C:Carbamidomethylation,k:Ubiquitination-GG	26.48	875.19	4142.98	228.944	196.2	Q960Z0	Kinesin-like protein Klp10A
1917	17K03_COLLAB-IT_CTRL_013.2893.2893.0	5	7.32	66.3	5110000	0.119	0	0	0	0	M245m M256m	238	(K)	GAHLAVRmDVASIGISCLmGISMAPGYAAGLEDGR	(I)	C:Carbamidomethylation,m:Oxidized methionine	18.02	717.03	3546.73	34.3885	669.8	Q9VWE6	Protein ELYS homolog
900	17K03_COLLAB-IT_CTRL_022.4135.4135.0	5	9.06	75.5	11600000	0.093	1	0	0	0	M421m M441m M442m	415	(R)	GGGPGGmATGPGGVAGGLGGMGMPPNmmSAQQK	(S)	m:Oxidized methionine	25.49	593.41	2915.31	47.712	-92.1	P21519	Neurogenic protein mastermind
1155	17K03_COLLAB-IT_CTRL_013.2629.2629.0	4	8.53	73.7	7510000	0.076	2	1	0	1	K133k	120	(K)	NVTINDSSDEEPLkGSKLVLPAR	(K)	k:Ubiquitination-GG	16.34	650.07	2482.32	114.943	346.7	Q9GQN5	Transcriptional regulator ATRX homolog
1346	17K03_COLLAB-IT_CTRL_031.2059.2059.0	4	8.22	79.3	28100000	0.071	3	1	0	1	K276k	258	(K)	AAEQTESPPQAEPTVTAEkAAESEAKPTEPK	(K)	k:Ubiquitination-GG	12.69	835.29	3222.57	115.573	458.5	P14199	Protein ref(2)P
607	17K03_COLLAB-IT_CTRL_021.2525.2525.0	5	10.02	75.2	28700000	0.052	4	1	0	1	M198m K219k	195	(R)	LSVmSQVWTEPVMKFTIPGKAFVPkPQVDVGVVK	(L)	m:Oxidized methionine,kUbiquitination-GG	15.55	775.25	3742.05	130.173	35	Q9VTM5	Dimethyladenosine transferase 1, mitochondrial
1957	17K03_COLLAB-IT_CTRL_031.2987.2987.0	3	7.28	70.4	3970000	0.045	2	1	0	1	K457k M464m	450	(K)	SQDQTLSkEDIVQImAYAYRMANEQMESEK	(G)	k:Ubiquitination-GG,mOxidized methionine	18.49	1223.05	3536.63	130.501	126.4	P18169	Defective chorion-1 protein, FC125 isoform
506	17K03_COLLAB-IT_CTRL_012.2482.2482.0	4	10.68	86.7	20500000	0.031	2	0	0	0	M1m M21m	1	(-)	mAYRKPSDLDGFIQQMPKADmR	(V)	m:Oxidized methionine	15.33	657.9	2598.26	30.3156	-636.9	Q9NBD7	CLIP-associating protein
630	17K03_COLLAB-IT_CTRL_023.2636.2636.0	5	9.93	90.5	20000000	0.022	1	0	0	0	M217m M223m	215	(K)	RQmPEEAAmQMIHAMEMMK	(N)	m:Oxidized methionine	16.22	465.68	2293.01	31.3621	-270.1	P54398	Fat body protein 2
1249	17K03_COLLAB-IT_CTRL_033.3744.3744.0	4	8.38	73.1	4980000	0.019	2	1	0	1	M558m K559k M561m	557	(R)	DmkSmIVPLQKVGASDAGSTAATAPAPAYMY	(-)	m:Oxidized methionine,kUbiquitination-GG	23.23	823.26	3142.53	147.492	443.7	Q9VPY0	Integrator complex subunit 14
2119	17K03_COLLAB-IT_CTRL_011.2557.2557.0	5	7.1	68.8	12700000	0.012	2	1	0	1	K354k	326	(K)	SEGTQAGGGLHQSVGTCTSSSKGTGTRNk	(D)	C:Carbamidomethylation,k:Ubiquitination-GG	15.87	594.07	2850.34	115.981	653.5	P91621	Protein still life, isoform SIF type 1
406	17K03_COLLAB-IT_CTRL_032.2176.2176.0	3	11.76	61.8	7530000	0.007	2	1	0	1	K1278k	1277	(K)	KkLSIENSDLLR	(Q)	k:Ubiquitination-GG	13.39	510.6	1415.82	113.964	-51.7	P05661	Myosin heavy chain, muscle
16	17K03_COLLAB-IT_CTRL_013.1972.1985.0	3	20.37	96.9	21300000	0.001	3	1	0	1	K219k	204	(K)	KPLPDNVSVVEPKEEk	(I)	k:Ubiquitination-GG	12.18	641.64	1807.98	114.925	458.9	Q06559	40S ribosomal protein S3
12	17K03_COLLAB-IT_CTRL_033.3163.3170.0	4	20.83	96.9	9850000	0	3	1	0	1	K123k	123	(K)	kKHNEIITDFQEQVEILTK	(N)	k:Ubiquitination-GG	19.5	607.41	2313.24	113.373	-276	P35415	Paramyosin, long form
24	17K03_COLLAB-IT_CTRL_011.2393.2401.0	4	19.72	94.2	16500000	0	3	1	0	1	K1193k	1193	(R)	kKHNDAVAEMAEQVDQLNK	(L)	k:Ubiquitination-GG	14.83	571.52	2168.08	114.982	411.2	P05661	Myosin heavy chain, muscle
38	17K03_COLLAB-IT_CTRL_033.2417.2417.0	4	19.25	94.8	8760000	0	3	1	0	1	K1194k	1193	(R)	KkHNDAVAEMAEQVDQLNK	(L)	k:Ubiquitination-GG	14.79	571.5	2168.08	114.902	376.2	P05661	Myosin heavy chain, muscle
40	17K03_COLLAB-IT_CTRL_021.3746.3757.0	3	19.15	89.8	56500000	0	2	1	0	1	K118k	96	(K)	LLSGVTIAQGGVLPNIQAVLLPkK	(T)	k:Ubiquitination-GG	22.93	848.82	2429.49	114.96	360.4	P84051	Histone H2A
50	17K03_COLLAB-IT_CTRL_033.2676.2676.0	4	18.79	95.5	11600000	0	2	1	0	1	K333k	317	(R)	LLTVNEEALDEVDLEKkR	(A)	k:Ubiquitination-GG	16.46	557.76	2114.13	113.884	-71.2	C0HK92	Uncharacterized protein CG45076
56	17K03_COLLAB-IT_CTRL_011.3196.3213.0	4	18.66	88.8	11700000	0	2	1	0	1	K94k	86	(R)	ICLDVLKDkWSPALQIR	(T)	C:Carbamidomethylation,k:Ubiquitination-GG	19.94	543.47	2055.14	115.716	770.8	P35128	Ubiquitin-conjugating enzyme E2 N
59	17K03_COLLAB-IT_CTRL_012.3175.3175.0	4	18.58	92.3	7570000	0	3	1	0	1	K123k	123	(K)	kKHNEIITDFQEQVEILTK	(N)	k:Ubiquitination-GG	19.72	607.57	2313.24	114.013	-12.2	P35415	Paramyosin, long form
66	17K03_COLLAB-IT_CTRL_031.2584.2595.0	3	18.47	98.8	19700000	0	2	1	0	1	K27k	12	(K)	TITLEVEPSDTIENVkAK	(I)	k:Ubiquitination-GG	15.95	701.02	1987.06	113.986	-27.1	P18101	Ubiquitin-60S ribosomal protein L40
73	17K03_COLLAB-IT_CTRL_032.3558.3561.0	4	18.18	89.1	24500000	0	3	1	0	1	K119k	96	(K)	LLSGVTIAQGGVLPNIQAVLLPKkTEK	(K)	k:Ubiquitination-GG	22.1	726.71	2787.67	116.147	724.8	P84051	Histone H2A
87	17K03_COLLAB-IT_CTRL_033.3733.3733.0	3	17.92	93.2	15200000	0	2	1	0	1	K118k	96	(K)	LLSGVTIAQGGVLPNIQAVLLPkK	(T)	k:Ubiquitination-GG	23.16	848.87	2429.49	115.11	419.4	P84051	Histone H2A
107	17K03_COLLAB-IT_CTRL_012.3707.3713.0	3	17.43	86.8	16900000	0	2	1	0	1	K118k	96	(K)	LLSGVTIAQGGVLPNIQAVLLPkK	(T)	k:Ubiquitination-GG	23.2	848.68	2429.49	114.54	195.4	P84051	Histone H2A
120	17K03_COLLAB-IT_CTRL_012.2373.2373.0	3	17.2	96.4	11300000	0	2	1	0	1	K1302k	1289	(R)	QLEEAESQVSQLSkIK	(I)	k:Ubiquitination-GG	14.64	644.65	1816.96	114.97	480.1	P05661	Myosin heavy chain, muscle
131	17K03_COLLAB-IT_CTRL_022.2371.2371.0	3	16.89	94.8	13900000	0	2	1	0	1	K1302k	1289	(R)	QLEEAESQVSQLSkIK	(I)	k:Ubiquitination-GG	14.59	644.59	1816.96	114.79	386.9	P05661	Myosin heavy chain, muscle
143	17K03_COLLAB-IT_CTRL_031.3550.3550.0	4	16.6	93.8	5590000	0	3	2	0	2	K119k K122k	96	(K)	LLSGVTIAQGGVLPNIQAVLLPKkTEk	(K)	k:Ubiquitination-GG	22.06	755.04	2787.67	229.468	457.9	P84051	Histone H2A
165	17K03_COLLAB-IT_CTRL_023.2629.2629.0	3	16.12	86.5	11300000	0	2	1	0	1	K27k	12	(K)	TITLEVEPSDTIENVkAK	(I)	k:Ubiquitination-GG	16.18	701.34	1987.06	114.946	429.7	P18101	Ubiquitin-60S ribosomal protein L40
194	17K03_COLLAB-IT_CTRL_032.2214.2214.0	3	15.49	87.7	21000000	0	2	1	0	1	K303k	286	(R)	AIVEEISTPVASTPASKk	(E)	k:Ubiquitination-GG	13.63	647.97	1828.01	113.889	-79.1	Q9V3S0	Cytochrome P450 4g1
213	17K03_COLLAB-IT_CTRL_022.2827.2827.0	3	15.12	85.8	34600000	0	2	1	0	1	K332k	317	(R)	LLTVNEEALDEVDLEkK	(R)	k:Ubiquitination-GG	17.31	691.41	1958.03	114.183	67.4	C0HK92	Uncharacterized protein CG45076
241	17K03_COLLAB-IT_CTRL_013.2218.2218.0	3	14.55	89	12700000	0	2	1	0	1	K302k	286	(R)	AIVEEISTPVASTPASkK	(E)	k:Ubiquitination-GG	13.76	647.99	1828.01	113.949	-48.3	Q9V3S0	Cytochrome P450 4g1
273	17K03_COLLAB-IT_CTRL_011.2695.2695.0	3	13.94	77.3	6650000	0	2	1	0	1	K213k	198	(R)	IINEPTAAAIAYGLDkK	(E)	k:Ubiquitination-GG	16.73	635	1787.99	114.995	500.4	P29844	Heat shock 70 kDa protein cognate 3
283	17K03_COLLAB-IT_CTRL_033.3565.3589.0	4	13.81	92.6	13000000	0	3	1	0	1	K122k	96	(K)	LLSGVTIAQGGVLPNIQAVLLPKKTEk	(K)	k:Ubiquitination-GG	22.1	726.55	2787.67	115.507	504.5	P84051	Histone H2A
340	17K03_COLLAB-IT_CTRL_033.2244.2251.0	3	12.86	84.9	14400000	0	2	1	0	1	K302k	286	(R)	AIVEEISTPVASTPASkK	(E)	k:Ubiquitination-GG	13.74	647.93	1828.01	113.769	-141	Q9V3S0	Cytochrome P450 4g1
380	17K03_COLLAB-IT_CTRL_012.3594.3594.0	4	12.15	70.6	14300000	0	3	1	0	1	K118k	96	(K)	LLSGVTIAQGGVLPNIQAVLLPkKTEK	(K)	k:Ubiquitination-GG	22.49	726.18	2787.67	114.028	-5.3	P84051	Histone H2A
399	17K03_COLLAB-IT_CTRL_023.3604.3604.0	4	11.89	78.3	11700000	0	3	2	0	2	K118k K119k	96	(K)	LLSGVTIAQGGVLPNIQAVLLPkkTEK	(K)	k:Ubiquitination-GG	22.25	755.09	2787.67	229.667	524.2	P84051	Histone H2A
435	17K03_COLLAB-IT_CTRL_013.3594.3594.0	4	11.42	70.8	16700000	0	3	1	0	1	K122k	96	(K)	LLSGVTIAQGGVLPNIQAVLLPKKTEk	(K)	k:Ubiquitination-GG	22.49	726.78	2787.67	116.427	821.1	P84051	Histone H2A
459	17K03_COLLAB-IT_CTRL_033.3727.3747.0	4	11.08	74.2	19200000	0	3	1	0	1	M1435m K1452k	1426	(R)	TGSYSGSPQmPQGLASKMQAASLPMQkMMSELK	(L)	m:Oxidized methionine,kUbiquitination-GG	23.12	908.52	3500.67	130.387	96.1	P10180	Homeobox protein cut
482	17K03_COLLAB-IT_CTRL_021.3876.3876.0	5	10.86	77	14500000	0	2	1	0	1	M357m M381m K386k	353	(K)	YRMEmLYEGPHDDEAAIAVKSCDPDGPLmMYISk	(M)	C:Carbamidomethylation,m:Oxidized methionine,kUbiquitination-GG	23.76	816.88	3932.77	147.604	385	P13060	Elongation factor 2
483	17K03_COLLAB-IT_CTRL_031.2988.2995.0	4	10.86	77.1	13000000	0	0	0	0	0	M1283m M1290m M1292m	1259	(R)	FPNSAAQAAAMRRMTQQPIPPSGPmMRPQHAmYmQQHGGAGGGPR	(T)	m:Oxidized methionine	18.5	1213.02	4803.26	45.7953	-451.5	P21519	Neurogenic protein mastermind
492	17K03_COLLAB-IT_CTRL_031.2369.2369.0	2	10.8	85.8	4910000	0	2	1	0	1	K1304k	1289	(R)	QLEEAESQVSQLSKIk	(I)	k:Ubiquitination-GG	14.65	966.4	1816.96	114.828	406.2	P05661	Myosin heavy chain, muscle
522	17K03_COLLAB-IT_CTRL_023.3274.3274.0	3	10.5	79.9	44400000	0	2	1	0	1	K94k	86	(R)	ICLDVLKDkWSPALQIR	(T)	C:Carbamidomethylation,k:Ubiquitination-GG	20.12	723.76	2055.14	114.124	37.1	P35128	Ubiquitin-conjugating enzyme E2 N
527	17K03_COLLAB-IT_CTRL_022.4042.4042.0	5	10.47	79.1	10200000	0	4	1	0	1	M755m K758k	722	(R)	AITPPSPSVQQSASPKSKGNNLDDSILMKPPSCmPPk	(S)	C:Carbamidomethylation,m:Oxidized methionine,kUbiquitination-GG	24.91	808.1	3904.96	131.51	364.8	P35820	Polycomb group protein Psc
541	17K03_COLLAB-IT_CTRL_032.3997.4003.0	5	10.39	79.3	9290000	0	4	1	0	1	K750k M755m	722	(R)	AITPPSPSVQQSASPKSKGNNLDDSILMkPPSCmPPK	(S)	C:Carbamidomethylation,k:Ubiquitination-GG,mOxidized methionine	24.86	808	3904.96	131.01	241	P35820	Polycomb group protein Psc
603	17K03_COLLAB-IT_CTRL_031.3995.3995.0	3	10.04	70.2	11200000	0	2	1	0	1	K3196k	3176	(R)	VSVPEDAQLNTLITKVHAMDk	(D)	k:Ubiquitination-GG	24.88	808.17	2309.22	113.278	-315.6	Q9VW71	Fat-like cadherin-related tumor suppressor homolog
658	17K03_COLLAB-IT_CTRL_032.2569.2569.0	5	9.81	72.8	17100000	0	1	0	0	0	M779m	777	(R)	NEmMCVNAEMPTRMVELSTNDICPAEK	(G)	C:Carbamidomethylation,m:Oxidized methionine	15.79	638.01	3170.38	15.6455	-109.7	P08953	Protein toll
665	17K03_COLLAB-IT_CTRL_012.2988.2988.0	3	9.78	70.2	6100000	0	2	1	0	1	K166k	152	(K)	GLSEETTTGVHNLYkMFK	(E)	k:Ubiquitination-GG	18.51	723.79	2055.02	114.334	134.1	Q27580	Adenosylhomocysteinase
704	17K03_COLLAB-IT_CTRL_011.1752.1752.0	4	9.62	83.9	2890000	0	3	1	0	1	K1194k M1202m	1193	(R)	KkHNDAVAEmAEQVDQLNK	(L)	k:Ubiquitination-GG,mOxidized methionine	10.79	575.48	2168.08	130.822	341	P05661	Myosin heavy chain, muscle
717	17K03_COLLAB-IT_CTRL_033.2711.2711.0	5	9.58	73.9	19500000	0	4	1	0	1	K395k	390	(R)	HITSTkGFLVMESDKPTPPAGAYSVESYEEASEDGCIAKVTK	(E)	C:Carbamidomethylation,k:Ubiquitination-GG	16.67	929.72	4530.17	114.402	77.3	Q9W3M2	DM7 family protein CG15332
721	17K03_COLLAB-IT_CTRL_013.2652.2652.0	3	9.56	63.4	12800000	0	2	1	0	1	K332k	317	(R)	LLTVNEEALDEVDLEkKR	(A)	k:Ubiquitination-GG	16.48	743.74	2114.13	115.072	461.4	C0HK92	Uncharacterized protein CG45076
732	17K03_COLLAB-IT_CTRL_012.2256.2277.0	5	9.53	75.1	15800000	0	3	2	0	2	K393k K409k	387	(K)	TNAVHSkIPDVESESDFFLTSAkPK	(T)	k:Ubiquitination-GG	13.93	595.84	2747.39	227.782	-102	Q8IMA8	Protein pangolin, isoform J
734	17K03_COLLAB-IT_CTRL_023.4127.4149.0	5	9.53	76.8	5140000	0	2	1	0	1	K79k	57	(K)	CFLTCVLLDLGLIDERGNVQIDkYMK	(S)	C:Carbamidomethylation,k:Ubiquitination-GG	25.54	646.82	3113.58	116.488	756.9	Q9V938	General odorant-binding protein 57e
777	17K03_COLLAB-IT_CTRL_032.3013.3013.0	4	9.4	71.7	47600000	0	2	0	0	0	M169m M179m M190m	164	(R)	SMGDKmIYQKTGVMFmAMCPGLTNSEmIMNLR	(D)	C:Carbamidomethylation,m:Oxidized methionine	18.55	933.78	3685.69	46.4112	-421.6	P54398	Fat body protein 2
779	17K03_COLLAB-IT_CTRL_032.3118.3118.0	3	9.39	65	9390000	0	0	0	0	0	M2m M3m	1	(-)	MmmNAFIEPAQHHLASYGLR	(M)	m:Oxidized methionine	19.26	782.87	2317.1	29.4916	-1064.6	P39768	Pair-rule protein odd-paired
797	17K03_COLLAB-IT_CTRL_021.3028.3028.0	5	9.33	85.6	23400000	0	0	0	0	0	M232m M241m	213	(R)	QVIAELIPVGLGRVPGGELmLVGSSAGGmGVMLNLDR	(I)	m:Oxidized methionine	18.42	747.99	3705.99	29.9356	-549.8	Q9VUX3	Palmitoleoyl-protein carboxylesterase NOTUM
809	17K03_COLLAB-IT_CTRL_032.2823.2823.0	4	9.29	76.5	4160000	0	2	1	0	1	K1235k	1207	(R)	DGEELDESLLGIVEMFPPNPLVNFLDTHkDK	(F)	k:Ubiquitination-GG	17.38	907.78	3511.73	116.368	640.9	Q9VGP1	Zinc finger FYVE domain-containing protein 26 homolog
830	17K03_COLLAB-IT_CTRL_011.2427.2427.0	4	9.22	73.8	39200000	0	1	1	1	0	M498m K505k	496	(R)	MVmLSNRLTkPSNR	(G)	m:Oxidized methionine,kUbiquitination-GG	15.04	445.05	1646.88	130.295	144.9	Q9VAD6	Conserved oligomeric Golgi complex subunit 7
834	17K03_COLLAB-IT_CTRL_032.4562.4562.0	4	9.22	77.4	2670000	0	2	1	0	1	M114m K132k	114	(R)	mYPTYTFDDVLNNIERLGkK	(K)	m:Oxidized methionine,kUbiquitination-GG	28.42	638.09	2417.22	132.121	817.2	Q8INX3	Protein TIPIN homolog
858	17K03_COLLAB-IT_CTRL_033.3482.3482.0	4	9.17	68.7	15900000	0	1	0	0	0	M374m M385m	358	(K)	AKLEPGLHLSHSLAHSmNPMAAMNIPAmR	(L)	m:Oxidized methionine	21.57	789.9	3125.56	31.0154	-308.7	P09085	Homeotic protein caudal
859	17K03_COLLAB-IT_CTRL_031.3363.3363.0	5	9.17	65.7	13700000	0	1	0	0	0	M1941m	1939	(K)	GMmQDFTVSYHILMPSTAYTFRVIAYNRYGISFPVYSK	(D)	m:Oxidized methionine	20.88	894.81	4454.18	15.8398	-34.7	O97394	Protein sidekick
874	17K03_COLLAB-IT_CTRL_032.2707.2707.0	3	9.13	74.1	25200000	0	3	2	1	1	K4k M6m M21m K22k	1	(-)	MELkSmDPVEMPIFGSTLKLmk	(F)	k:Ubiquitination-GG,mOxidized methionine	16.63	929.41	2525.29	260.927	305.5	Q9VLE5	Odorant receptor 30a
890	17K03_COLLAB-IT_CTRL_013.2761.2767.0	5	9.08	68.8	30100000	0	3	0	0	0	M164m	143	(R)	DLKPENLLLDEHDNVKISDFGmATMFRCK	(G)	C:Carbamidomethylation,m:Oxidized methionine	17.2	691.37	3436.67	16.1511	45.2	O61661	Serine/threonine-protein kinase grp
899	17K03_COLLAB-IT_CTRL_021.2622.2622.0	5	9.07	79.2	19600000	0	2	0	0	0	M839m	832	(K)	QIMINKEmPAVTSMNPLQGQSAQVPYTAVPISYK	(G)	m:Oxidized methionine	16.09	750.91	3734.89	15.6255	-98.5	P25167	DNA-directed RNA polymerase III subunit RPC2
925	17K03_COLLAB-IT_CTRL_023.3074.3074.0	5	9.01	64.9	34200000	0	4	1	0	1	K1260k M1270m	1235	(K)	YGIPDPLSKTTLAANNMFMTPSALFkIQQESLSAMmMKPPK	(S)	k:Ubiquitination-GG,mOxidized methionine	18.87	932.73	4528.28	131.339	279.2	Q9VKJ1	MPN domain-containing protein CG4751
932	17K03_COLLAB-IT_CTRL_011.1872.1872.0	4	8.99	63.6	6490000	0	3	1	0	1	K1694k	1692	(K)	EKkMQEEPPILK	(F)	k:Ubiquitination-GG	11.54	396.92	1469.8	114.855	512.4	Q9VB11	Protein unc-80 homolog
940	17K03_COLLAB-IT_CTRL_012.2885.2887.0	4	8.98	71.3	16600000	0	2	1	0	1	K3k	1	(-)	MFkVKDLLLSPTTFEDPIFGTHLR	(Y)	k:Ubiquitination-GG	17.87	730.36	2805.5	112.917	-385.7	Q9V8Y7	Odorant receptor 56a
980	17K03_COLLAB-IT_CTRL_011.2982.2982.0	5	8.91	74.9	4660000	0	3	2	0	2	K595k M606m K616k	584	(R)	ETLLRPVSLVAkDSGHCLPIAEmGNYQEYLKNk	(D)	C:Carbamidomethylation,k:Ubiquitination-GG,mOxidized methionine	18.56	804.36	3773.93	243.836	-61	Q9W485	Integrator complex subunit 6
1003	17K03_COLLAB-IT_CTRL_013.2816.2816.0	5	8.87	72.5	7970000	0	3	1	0	1	M194m K209k M211m	190	(K)	MQQPmRSDAVEGKELGQLMkPmHSLVDLVK	(L)	m:Oxidized methionine,kUbiquitination-GG	17.54	709.02	3395.73	145.34	-195.6	Q9VN97	Probable mitochondrial import inner membrane translocase subunit Tim17 4
1038	17K03_COLLAB-IT_CTRL_032.2706.2706.0	4	8.79	72.3	12600000	0	3	1	0	1	K400k	382	(K)	VKDALGNVGYIPSNYVKPkALLGLER	(Y)	k:Ubiquitination-GG	16.63	733.2	2814.59	115.191	391.7	P08630	Tyrosine-protein kinase Btk29A
1039	17K03_COLLAB-IT_CTRL_012.4084.4084.0	5	8.78	86	7350000	0	1	0	0	0	M605m	582	(K)	ARGGNVGDAGGAADRVINQILTEmDGMGAK	(K)	m:Oxidized methionine	25.58	592.63	2944.44	14.6845	-442.8	Q7KN62	Transitional endoplasmic reticulum ATPase TER94
1043	17K03_COLLAB-IT_CTRL_032.3646.3646.0	5	8.78	71.8	9160000	0	1	0	0	0	M877m	856	(R)	RYLAEGAEVLAKDSNSMDQLMmYLESSLATLYDTLNEINFQR	(I)	m:Oxidized methionine	22.66	973.14	4843.33	18.3446	483.3	Q9VBY8	Protein unc-13 homolog 4B
1065	17K03_COLLAB-IT_CTRL_023.2061.2061.0	5	8.73	84.1	7930000	0	2	1	0	1	M1m M3m M12m K13k	1	(-)	mTmSMYSTTDKmkMSAPSCFPGR	(Y)	C:Carbamidomethylation,m:Oxidized methionine,kUbiquitination-GG	12.62	562.6	2645.14	163.835	643.4	P24350	Inhibitory POU protein
1078	17K03_COLLAB-IT_CTRL_021.2910.2930.0	4	8.7	70.3	45900000	0	2	1	0	1	K5k	1	(-)	MFKVkDLLLSPTTFEDPIFGTHLR	(Y)	k:Ubiquitination-GG	17.7	730.36	2805.5	112.917	-385.7	Q9V8Y7	Odorant receptor 56a
1100	17K03_COLLAB-IT_CTRL_021.3676.3676.0	5	8.64	60.9	9710000	0	1	0	0	0	M200m	184	(R)	ATAMQAACDQAAGAMAmTLYGPDTNLGEACARAQQWCLDK	(G)	C:Carbamidomethylation,m:Oxidized methionine	22.49	868.05	4317.89	18.3296	538.4	Q8T3L6	Probable malonyl-CoA-acyl carrier protein transacylase, mitochondrial
1102	17K03_COLLAB-IT_CTRL_031.1794.1799.0	5	8.64	70.8	9990000	0	3	1	0	1	M664m K685k	654	(R)	LCALQGNAGSmKTEIFPMIDAPYDLSIGSKTk	(H)	C:Carbamidomethylation,m:Oxidized methionine,kUbiquitination-GG	11.02	717.94	3456.72	128.95	-303.5	Q8IMA8	Protein pangolin, isoform J
1125	17K03_COLLAB-IT_CTRL_023.2222.2222.0	3	8.6	88.6	13700000	0	0	0	0	0	M249m M254m	245	(R)	LQTFmPPSVmMSPRR	(L)	m:Oxidized methionine	13.64	604.38	1777.89	33.2344	687.2	Q7K0L4	WD repeat-containing protein 26 homolog
1129	17K03_COLLAB-IT_CTRL_022.3228.3228.0	4	8.59	76.3	15800000	0	2	1	0	1	M1451m M1454m K1456k	1437	(R)	LLGVCSRGQPALVVmELmKk	(G)	C:Carbamidomethylation,m:Oxidized methionine,kUbiquitination-GG	19.74	594.41	2229.23	145.39	-270.6	P09208	Insulin-like receptor
1139	17K03_COLLAB-IT_CTRL_033.3420.3420.0	5	8.56	77.2	7740000	0	2	1	0	1	K211k	178	(R)	SLHDHLTADLGFSRQNSMPSDYLFDMPVKSTMPk	(S)	k:Ubiquitination-GG	21.18	796.5	3865.84	112.636	-353.6	P22745	Protein bag-of-marbles
1154	17K03_COLLAB-IT_CTRL_013.2380.2380.0	4	8.53	82.6	11400000	0	2	1	0	1	K744k	726	(R)	MGAIVAVTGDGVNDSPALkK	(A)	k:Ubiquitination-GG	14.77	514.75	1943.03	112.951	-530.8	P13607	Sodium/potassium-transporting ATPase subunit alpha
1159	17K03_COLLAB-IT_CTRL_031.3819.3819.0	5	8.53	92.3	15000000	0	2	1	1	0	M355m M381m K386k	353	(K)	YRmEMLYEGPHDDEAAIAVKSCDPDGPLmMYISk	(M)	C:Carbamidomethylation,m:Oxidized methionine,kUbiquitination-GG	23.75	816.47	3932.77	145.554	-117.5	P13060	Elongation factor 2
1172	17K03_COLLAB-IT_CTRL_033.2610.2610.0	5	8.51	77.5	8940000	0	1	1	1	0	M1m K26k	1	(-)	mIMILYWSLPMILFILGLFCFVSNRk	(H)	C:Carbamidomethylation,m:Oxidized methionine,kUbiquitination-GG	16.05	667.85	3205.72	129.501	-161	P18934	NADH-ubiquinone oxidoreductase chain 4L
1179	17K03_COLLAB-IT_CTRL_011.2688.2688.0	5	8.49	69	6230000	0	2	1	0	1	M170m M173m M200m K211k	164	(R)	ISGGLVmPPmPPVPPMIVGQGDGAEQDFVAMLTAWYmSGYYTGLYQGkK	(E)	m:Oxidized methionine,kUbiquitination-GG	16.69	1082.78	5248.54	161.334	-128.1	Q9VV74	Survival motor neuron protein
1190	17K03_COLLAB-IT_CTRL_032.3180.3180.0	5	8.48	64.5	9870000	0	0	0	0	0	M407m M412m	396	(K)	EQQPLLLYTTQmTIMGmHLREDNVR	(N)	m:Oxidized methionine	19.64	611.17	3017.5	34.3204	763.6	P98163	Putative vitellogenin receptor
1207	17K03_COLLAB-IT_CTRL_011.2960.2960.0	4	8.45	72.4	3730000	0	2	1	0	1	M274m K286k	271	(R)	NDFmGALSFGISEIIkNPTNGWFK	(L)	m:Oxidized methionine,kUbiquitination-GG	18.42	704.71	2686.33	129.485	-196.4	P05130	Protein kinase C, brain isozyme
1232	17K03_COLLAB-IT_CTRL_013.3022.3022.2	2	8.4	66.4	6310000	0	0	0	0	0	M157m	146	(K)	VLGGTSVLNGMmYVR	(G)	m:Oxidized methionine	18.83	806.77	1596.82	15.7091	-177.3	P18173	Glucose dehydrogenase [FAD, quinone]
1234	17K03_COLLAB-IT_CTRL_023.3333.3375.0	5	8.4	79.1	40200000	0	2	0	0	0	M728m	726	(K)	HKmMLTHLVVRPGMGGMTTNFSK	(D)	m:Oxidized methionine	20.52	519.07	2573.3	18.0237	782.9	O16102	Chromodomain-helicase-DNA-binding protein 3
1241	17K03_COLLAB-IT_CTRL_021.2141.2141.0	5	8.39	68.5	6930000	0	0	0	0	0	M251m	242	(R)	REVGQMGILmLMELLDR	(Y)	m:Oxidized methionine	13.3	404.83	2004.04	16.077	40.6	Q8INF7	Dynein assembly factor 5, axonemal
1288	17K03_COLLAB-IT_CTRL_021.2322.2329.0	4	8.31	62.7	19000000	0	1	0	0	0	M1m M19m	1	(-)	mSGIMRVPSILAKNAVASmQR	(A)	m:Oxidized methionine	14.36	574.38	2260.21	34.2895	1002.3	Q94523	Succinate dehydrogenase [ubiquinone] flavoprotein subunit, mitochondrial
1297	17K03_COLLAB-IT_CTRL_032.3200.3200.0	5	8.3	62.7	8710000	0	3	1	0	1	M227m M251m K256k M261m	215	(R)	VDYEIINEEDKPmDELEQSDIKPYNDADDDLQDESTmHASEkTIMEmSSQR	(H)	m:Oxidized methionine,kUbiquitination-GG	19.77	1228.99	5977.6	163.317	209.9	Q9VHY5	Transcription initiation factor TFIID subunit 7
1303	17K03_COLLAB-IT_CTRL_023.1836.1863.0	4	8.29	84.5	19000000	0	2	1	0	1	K305k	291	(R)	TNQAIVSGTLQKLLk	(A)	k:Ubiquitination-GG	11.21	432.26	1613.96	112.06	-1149	Q7K5N4	Ubiquitin carboxyl-terminal hydrolase calypso
1324	17K03_COLLAB-IT_CTRL_013.3144.3144.0	5	8.25	62.3	8500000	0	2	0	0	0	M437m	437	(K)	mGAHMNNINYDSQSLSFAYIGSFKTIQPSAK	(Q)	m:Oxidized methionine	19.61	687.67	3420.64	13.6858	-672.4	Q9GNK5	Peptidoglycan-recognition protein LC
1339	17K03_COLLAB-IT_CTRL_023.2547.2547.0	4	8.23	74.6	4230000	0	4	2	0	2	K535k K561k	531	(K)	VPKPkVLTLDPNDENIILGIPDDIDPSKINk	(S)	k:Ubiquitination-GG	15.68	910.05	3410.88	226.3	-491	P51123	Transcription initiation factor TFIID subunit 1
1358	17K03_COLLAB-IT_CTRL_032.2401.2401.0	5	8.2	70.7	8120000	0	4	2	0	2	K753k K765k M772m	752	(R)	TkPAANAIQFTVNkKQGAVSmNGQNGTAEGSPQK	(Y)	k:Ubiquitination-GG,mOxidized methionine	14.76	743.96	3472.76	243.011	-288	P48591	Ribonucleoside-diphosphate reductase large subunit
1375	17K03_COLLAB-IT_CTRL_012.2419.2419.0	3	8.15	86.7	6920000	0	2	1	0	1	K94k	86	(R)	ICLDVLKDk	(W)	C:Carbamidomethylation,k:Ubiquitination-GG	14.93	406.65	1103.61	114.323	229.6	P35128	Ubiquitin-conjugating enzyme E2 N
1387	17K03_COLLAB-IT_CTRL_033.2496.2496.0	4	8.14	79.5	5000000	0	1	0	0	0	M61m M69m M73m	61	(K)	mGETTIDMmYGGmRGIKALVTETSVLDADEGIR	(F)	m:Oxidized methionine	15.32	902.54	3560.71	46.4278	-431.6	Q9W401	Probable citrate synthase, mitochondrial
1416	17K03_COLLAB-IT_CTRL_023.2389.2389.0	5	8.07	70.4	4310000	0	0	0	0	0	M1269m M1292m	1259	(R)	FPNSAAQAAAmRRMTQQPIPPSGPMMRPQHAMYmQQHGGAGGGPR	(T)	m:Oxidized methionine	14.69	967.91	4803.26	32.258	55.5	P21519	Neurogenic protein mastermind
1421	17K03_COLLAB-IT_CTRL_023.3763.3763.0	4	8.06	68.5	12300000	0	2	1	0	1	K1869k	1828	(R)	QPTIMSSSMPDDVIGGSSLQPSTASAGSSNASSHTGRPSLKk	(T)	k:Ubiquitination-GG	23.24	1068.46	4159	111.815	-521.6	P09208	Insulin-like receptor
1423	17K03_COLLAB-IT_CTRL_032.2564.2570.0	4	8.06	61.4	25500000	0	3	1	0	1	M106m K118k	92	(R)	GLPGPLGPTGLKGEmGFPGMEGPSGDkGQK	(G)	m:Oxidized methionine,kUbiquitination-GG	15.76	757.76	2896.43	131.585	510.9	P08120	Collagen alpha-1(IV) chain
1427	17K03_COLLAB-IT_CTRL_013.3573.3573.0	5	8.05	66	10300000	0	3	2	0	2	K76k M93m K99k M105m	75	(R)	FkTFSAGEFLSSIQIGVNmYGSSFkSYLTMmGYK	(K)	k:Ubiquitination-GG,mOxidized methionine	22.36	816.79	3819.85	260.074	-0.5	P81910	Odorant receptor 22b
1542	17K03_COLLAB-IT_CTRL_023.3156.3156.0	3	7.9	86.8	7150000	0	2	1	0	1	K804k	790	(K)	NLILLQDALDKSTAk	(I)	k:Ubiquitination-GG	19.38	586.11	1642.94	113.378	-378.6	P35415	Paramyosin, long form
1549	17K03_COLLAB-IT_CTRL_031.2022.2022.0	4	7.9	60.3	4310000	0	2	2	2	0	M141m K143k M170m K171k	141	(K)	mVkELMGYEGFLSSCRFLDDGHLITGSGDmk	(I)	C:Carbamidomethylation,m:Oxidized methionine,kUbiquitination-GG	12.46	939.48	3493.63	261.272	318.7	P29829	Guanine nucleotide-binding protein subunit beta-2
1568	17K03_COLLAB-IT_CTRL_011.2361.2361.0	5	7.86	60.3	9660000	0	2	1	0	1	M702m K718k	694	(R)	QILRSVFLmNMSTAQEEIDIPEKTk	(E)	m:Oxidized methionine,kUbiquitination-GG	14.64	611.2	2921.51	130.46	138.3	Q9VB70	Lateral signaling target protein 2 homolog
1580	17K03_COLLAB-IT_CTRL_022.5814.5814.0	4	7.83	91.2	6740000	0	4	1	0	1	K1245k	1236	(K)	DKKPAAAPLkPAIKVGQSSAAAGGER	(G)	k:Ubiquitination-GG	36.06	658.49	2518.41	112.528	-575.7	P19334	Transient receptor potential protein
1604	17K03_COLLAB-IT_CTRL_032.4145.4145.0	5	7.79	68.3	8370000	0	1	1	1	0	M191m M194m K235k	187	(K)	LMDNmGGmPSAVPSVSATRLLLPSNVPLPLAQCENYNAYLGSTVHTPVkR	(Y)	C:Carbamidomethylation,m:Oxidized methionine,kUbiquitination-GG	25.79	1103.08	5366.72	144.655	-249.9	Q76NQ1	Inactive rhomboid protein 1
1610	17K03_COLLAB-IT_CTRL_011.2048.2048.0	4	7.77	88	5810000	0	1	1	1	0	M457m K460k	448	(R)	MCIGYRYAQmLMkLLLAR	(I)	C:Carbamidomethylation,m:Oxidized methionine,kUbiquitination-GG	12.64	591.32	2231.17	131.09	445.3	Q9VHP4	Probable cytochrome P450 313b1
1630	17K03_COLLAB-IT_CTRL_013.3172.3172.0	4	7.75	63.7	7630000	0	3	1	0	1	M796m K813k M814m M815m	780	(R)	LVSYNQVEKDLIPPEImSYCATSDVGAVGSCEDkmmVTESGLK	(L)	C:Carbamidomethylation,m:Oxidized methionine,kUbiquitination-GG	19.78	1229.14	4751.23	162.311	57.7	Q6J5K9	Probable RNA helicase armi
1637	17K03_COLLAB-IT_CTRL_033.3616.3616.0	4	7.75	100	3500000	0	2	0	0	0	M557m	545	(K)	QLLMTDDYGKHLmGVEDLLQKHSLVEADINILGER	(V)	m:Oxidized methionine	22.42	1003.87	3994.04	18.4169	603.6	Q00963	Spectrin beta chain
1649	17K03_COLLAB-IT_CTRL_021.3782.3782.0	5	7.72	86.9	32500000	0	4	1	0	1	K770k M771m	765	(K)	ISMVPkmHHVKPAGVGPNNGNINKPRWNGK	(T)	k:Ubiquitination-GG,mOxidized methionine	23.16	682.18	3277.73	129.14	-263.6	Q23972	Protein Smaug
1657	17K03_COLLAB-IT_CTRL_023.2988.2988.0	5	7.71	63.5	53900000	0	1	0	0	0	M316m	312	(K)	LAVVmAMDMLMGGVDTTSTAISGILLNLAK	(N)	m:Oxidized methionine	18.34	611.3	3036.59	15.8857	-35.8	Q9VVR9	Probable cytochrome P450 12c1, mitochondrial
1698	17K03_COLLAB-IT_CTRL_031.3489.3489.0	5	7.65	66.5	19700000	0	0	0	0	0	M196m M202m	196	(K)	mGHTISmVMLLGMMLSFAEHILSMVSAINYASFCNRTADPIQNYFLR	(T)	C:Carbamidomethylation,m:Oxidized methionine	21.68	1083.53	5381.59	32.0276	7	P83297	Gustatory receptor for sugar taste 64f
1710	17K03_COLLAB-IT_CTRL_022.2239.2239.2	2	7.63	73.8	8070000	0	2	1	0	1	K302k	286	(R)	AIVEEISTPVASTPASkK	(E)	k:Ubiquitination-GG	13.79	972.12	1828.01	115.227	609.1	Q9V3S0	Cytochrome P450 4g1
1714	17K03_COLLAB-IT_CTRL_032.3467.3467.0	4	7.63	61.5	9200000	0	4	2	0	2	K929k M930m K959k	929	(K)	kmAADEVSLADDEGAPNGEGEKKPLDASGSk	(K)	k:Ubiquitination-GG,mOxidized methionine	21.52	841.42	3116.47	246.189	627.1	P19334	Transient receptor potential protein
1717	17K03_COLLAB-IT_CTRL_023.3049.3049.0	4	7.62	63.7	23100000	0	1	0	0	0	M1186m	1184	(R)	DQmMTANVNKALIANMFHDDFR	(Y)	m:Oxidized methionine	18.72	650.53	2582.2	16.9033	349.5	Q9VEZ3	Protein mini spindles
1725	17K03_COLLAB-IT_CTRL_031.2743.2743.0	4	7.61	67.7	2600000	0	2	1	0	1	M112m K119k	112	(K)	mTAGSDTkKPPYSYNALIMMAIQDSPEQRLTLNGIYQYLINR	(F)	m:Oxidized methionine,kUbiquitination-GG	16.96	1235.09	4805.41	131.928	382.9	P32030	Fork head domain transcription factor slp1
1729	17K03_COLLAB-IT_CTRL_023.1856.1856.0	5	7.6	73.6	2560000	0	3	1	0	1	K274k M276m	274	(R)	kKmAFLDTLLSSTIDGRPLNSK	(E)	k:Ubiquitination-GG,mOxidized methionine	11.33	513.5	2435.33	128.138	-741	Q27606	Cytochrome P450 4e2
1738	17K03_COLLAB-IT_CTRL_013.3169.3169.0	4	7.59	79.7	4380000	0	2	0	0	0	M585m	583	(K)	MTmRALVSNSFIVGGEKVMQPK	(K)	m:Oxidized methionine	19.76	610.76	2423.26	16.7574	312.5	Q9VX91	E3 ubiquitin-protein ligase UBR1
1742	17K03_COLLAB-IT_CTRL_022.2740.2740.0	4	7.59	75.4	37500000	0	3	1	0	1	M4373m K4399k	4369	(R)	KGMEmVTSATSSTPLPTPIPTSSVLTAAEKk	(A)	m:Oxidized methionine,kUbiquitination-GG	16.79	823.94	3160.65	132.09	623.3	Q8SX83	Protein split ends
1771	17K03_COLLAB-IT_CTRL_021.4162.4162.0	4	7.55	81.9	6330000	0	0	0	0	0	M1028m M1047m	1023	(R)	NVMPAmVRFVETFPILADDCVNILmTTGR	(I)	C:Carbamidomethylation,m:Oxidized methionine	25.57	836.8	3310.65	33.5327	461.4	Q9VX31	Integrator complex subunit 2
1843	17K03_COLLAB-IT_CTRL_013.2924.2924.0	5	7.42	67.7	5140000	0	1	1	1	0	M286m M288m K293k	261	(K)	QIAVAVTQAVQPAGVAVVVEGVHMCmVmRGVQk	(I)	C:Carbamidomethylation,m:Oxidized methionine,kUbiquitination-GG	18.21	722.87	3462.82	147.5	406.5	P48596	GTP cyclohydrolase 1
1861	17K03_COLLAB-IT_CTRL_033.3533.3533.0	3	7.4	67.5	7760000	0	0	0	0	0	M160m M161m	144	(K)	FRLEQLDHFDDGSMRHmmDLTQQEYIQR	(F)	m:Oxidized methionine	21.9	1190.75	3539.62	30.6101	-386.4	Q9VHM2	UPF0505 protein CG8202
1873	17K03_COLLAB-IT_CTRL_032.2873.2877.0	5	7.38	71	33600000	0	1	1	1	0	M553m K563k M570m	552	(R)	DmCQEDQVALLkGGCTEMmIMRSVMIYDDDR	(A)	C:Carbamidomethylation,m:Oxidized methionine,kUbiquitination-GG	17.69	771.91	3710.61	144.909	-291.5	Q24143	Nuclear hormone receptor HR96
1896	17K03_COLLAB-IT_CTRL_013.3272.3275.0	5	7.35	68.8	21100000	0	2	1	0	1	M117m K120k	76	(R)	TNDDGNVECQHGVMECELNAWHACILEHHDIAQSLKLIACMmRGk	(K)	C:Carbamidomethylation,m:Oxidized methionine,kUbiquitination-GG	20.46	1084.82	5291.38	128.688	-249	Q9VCK1	GILT-like protein 2
1918	17K03_COLLAB-IT_CTRL_012.4567.4567.0	3	7.32	65.8	7050000	0	3	1	0	1	M247m K261k	241	(R)	GYSIIPmSDSKLPEPTMMIPkMK	(A)	m:Oxidized methionine,kUbiquitination-GG	28.63	908.51	2594.31	129.205	-305.7	O77475	Ceramide phosphoethanolamine synthase
1937	17K03_COLLAB-IT_CTRL_011.3220.3220.0	5	7.3	65.7	5230000	0	1	1	1	0	K617k M631m M641m	616	(R)	IkIFNGSHSFEPSGVmAVPPHSTVLmDCMYPR	(V)	C:Carbamidomethylation,k:Ubiquitination-GG,mOxidized methionine	20.15	751.45	3604.72	148.5	657.4	Q09101	Locomotion-related protein Hikaru genki
1952	17K03_COLLAB-IT_CTRL_021.3791.3791.0	4	7.28	61	12300000	0	3	1	0	1	K895k	866	(K)	DPQWFDLPPVKSITMSTISLPAMLSGVNLkSK	(V)	k:Ubiquitination-GG	23.22	904.6	3500.85	114.525	133.3	P51592	E3 ubiquitin-protein ligase hyd
1982	17K03_COLLAB-IT_CTRL_023.3680.3680.0	3	7.25	100	14500000	0	1	1	1	0	K81k M97m	80	(K)	VkEIQVETIVDSLCANMmSNTEQLR	(D)	C:Carbamidomethylation,k:Ubiquitination-GG,mOxidized methionine	22.72	1013.11	2908.42	128.894	-376.5	Q9VKY2	Cullin-associated NEDD8-dissociated protein 1
1985	17K03_COLLAB-IT_CTRL_031.2109.2109.0	5	7.25	100	6270000	0	0	0	0	0	M1317m M1341m	1316	(R)	FmSTHTAGADDLRGSTINIPGEMQRmR	(T)	m:Oxidized methionine	13.01	605.31	2992.42	30.1023	-624.5	A8DYE2	Transient receptor potential cation channel trpm
1986	17K03_COLLAB-IT_CTRL_013.3347.3347.0	5	7.24	70.8	7820000	0	3	2	1	1	M336m K352k K364k	332	(K)	GMNVmLQSENGILGLGPFPTkDKVDPDLINAGk	(E)	m:Oxidized methionine,kUbiquitination-GG	20.93	743.27	3468.79	243.534	-147.2	Q9W058	Succinyl-CoA:3-ketoacid-coenzyme A transferase, mitochondrial
1990	17K03_COLLAB-IT_CTRL_022.5804.5804.0	5	7.24	64.3	6640000	0	3	1	0	1	M182m M209m K212k	182	(R)	mGLEAGKSFDVHDYMSQTTVDILLSTAmGVkK	(L)	m:Oxidized methionine,kUbiquitination-GG	35.99	724.48	3472.72	145.655	-104.4	Q9V3S0	Cytochrome P450 4g1
1995	17K03_COLLAB-IT_CTRL_011.2696.2696.0	5	7.23	74.1	6340000	0	2	1	0	1	K341k M346m M350m M367m	337	(R)	KDHAkCAVEmGLDmIDAIATVVEATDVILNmR	(V)	C:Carbamidomethylation,k:Ubiquitination-GG,mOxidized methionine	16.74	739.53	3529.75	163.869	498.4	P32870	Ca(2+)/calmodulin-responsive adenylate cyclase
2011	17K03_COLLAB-IT_CTRL_011.3548.3548.0	3	7.22	92.2	6210000	0	3	2	0	2	K118k K119k	96	(K)	LLSGVTIAQGGVLPNIQAVLLPkkTEK	(K)	k:Ubiquitination-GG	22.28	1005.9	2787.67	228.015	-23.6	P84051	Histone H2A
2040	17K03_COLLAB-IT_CTRL_021.2842.2842.0	5	7.19	71.3	43800000	0	1	0	0	0	M738m M749m	734	(K)	GEMLmMVQELAPLGSmLQYILDHGHEITANAELK	(V)	m:Oxidized methionine	17.3	763.85	3782.86	32.3585	96.6	Q24145	Tyrosine-protein kinase shark
2049	17K03_COLLAB-IT_CTRL_022.2971.2971.0	3	7.18	62.4	24200000	0	2	1	0	1	K404k	390	(K)	RLGVANGDIYHTPTkK	(S)	k:Ubiquitination-GG	18.15	628.44	1769.97	113.34	-373.4	O16810	Origin recognition complex subunit 1
2061	17K03_COLLAB-IT_CTRL_023.3121.3123.0	5	7.17	63.2	55900000	0	1	1	1	0	M115m K119k	88	(K)	QQDVDALTMSIEAIEDASRDYATLLEDmMTTk	(H)	m:Oxidized methionine,kUbiquitination-GG	19.16	747.68	3604.67	129.701	-90.3	Q9W2P0	Augmin complex subunit dgt3
2072	17K03_COLLAB-IT_CTRL_023.1896.1896.0	5	7.16	68.4	11500000	0	2	1	0	1	M1169m M1177m K1184k M1193m	1166	(K)	TFPmQIDGEPWmQMPCTIkVTHKNQVPmLMAPR	(S)	C:Carbamidomethylation,m:Oxidized methionine,kUbiquitination-GG	11.58	815.51	3912.89	160.63	-343.2	Q01583	Diacylglycerol kinase 1
2073	17K03_COLLAB-IT_CTRL_032.3908.3908.0	5	7.16	76.7	6200000	0	3	1	0	1	M32m M33m M37m M46m M50m K52k	18	(K)	APKNQGQSGGANEDmmPDYmNILGMIFSmCGLmMkLK	(W)	C:Carbamidomethylation,m:Oxidized methionine,kUbiquitination-GG	24.3	861.68	4108.86	195.508	346.4	Q9VRJ8	Protein Asterix
2085	17K03_COLLAB-IT_CTRL_012.3009.3009.0	5	7.14	77.9	6050000	0	2	1	0	1	M288m M289m K300k	269	(K)	EEFRDITQLTEAQLPLLDHmmDLANQIIEKQk	(H)	m:Oxidized methionine,kUbiquitination-GG	18.65	792.11	3810.94	145.58	-114.3	Q8MSG8	Aprataxin-like protein
2125	17K03_COLLAB-IT_CTRL_031.3047.3047.0	4	7.1	79.9	10500000	0	3	1	0	1	M1075m K1108k	1070	(R)	SLNTPmSTQSASHAPPHPVSILSGASSSSPMSGEPAKKk	(G)	m:Oxidized methionine,kUbiquitination-GG	18.87	1005.26	3888.92	129.096	-234.3	A1Z6W3	Protein prickle
2138	17K03_COLLAB-IT_CTRL_013.4132.4132.0	4	7.07	73.6	4760000	0	2	2	2	0	M493m M506m K519k K525k	492	(R)	GmGMHCRLIVNLQPmPLRPAASDLIPIkLRPDDk	(N)	C:Carbamidomethylation,m:Oxidized methionine,kUbiquitination-GG	25.87	1028.88	3853.06	259.44	-154.6	Q24595	DNA repair protein complementing XP-C cells homolog
2141	17K03_COLLAB-IT_CTRL_023.3544.3544.0	4	7.07	69.1	12900000	0	1	0	0	0	M329m	321	(K)	DSNNNNIMmNSGNIMGGNNNDFNTIMNDKEDNNR	(H)	m:Oxidized methionine	21.85	962.69	3831.58	16.1572	42.2	Q9VCR3	Proteoglycan Cow
2147	17K03_COLLAB-IT_CTRL_023.2687.2687.0	3	7.06	66.9	24500000	0	3	2	1	1	K30k K39k	29	(K)	AkENNNTAGGkK	(N)	k:Ubiquitination-GG	16.52	487.84	1231.64	229.867	1218.4	A1ZAB5	Protein clueless
2158	17K03_COLLAB-IT_CTRL_011.2515.2515.0	4	7.05	72.8	3600000	0	2	1	0	1	M147m K159k	132	(K)	VLILPISGTGQSNMTmVNVRAIVSFSGkPLVK	(N)	m:Oxidized methionine,kUbiquitination-GG	15.61	872.35	3356.88	129.499	-154.7	Q9VBV3	Protein takeout
2173	17K03_COLLAB-IT_CTRL_013.5551.5551.0	5	7.03	81.3	4150000	0	0	0	0	0	M973m	955	(K)	APQNMGMPMGMPMQQEDMmAPQSICFIGDEEDVDELER	(N)	C:Carbamidomethylation,m:Oxidized methionine	34.81	875.46	4357.8	15.4692	-120.2	A1ZAU8	Patronin
2189	17K03_COLLAB-IT_CTRL_011.2991.2991.0	5	7.01	69.5	4400000	0	3	1	0	1	K146k	117	(R)	KQAEHPNNQSHHINHHNHQHPTSNPNELPkPKR	(V)	k:Ubiquitination-GG	18.62	804.2	3902.92	114.055	3.1	Q9VRP5	Ubiquitin carboxyl-terminal hydrolase 36
2196	17K03_COLLAB-IT_CTRL_022.3749.3749.0	5	7.01	63.4	15600000	0	3	1	0	1	M396m K404k	358	(R)	VTNALYKGNVEGLAELNLSEIQQTFQGATMVNLLTEPGmSILELAMkAK	(C)	m:Oxidized methionine,kUbiquitination-GG	23.07	1082.76	5278.74	131.03	183.3	Q9W107	Tyrosine--tRNA ligase, mitochondrial
2197	17K03_COLLAB-IT_CTRL_033.2545.2545.0	5	7.01	60.7	17800000	0	3	1	0	1	K613k	582	(R)	ICGLIEKEMLSFWLVIVDDVLAGHNCEEKLPk	(V)	C:Carbamidomethylation,k:Ubiquitination-GG	15.64	774.55	3755.92	112.8	-321.3	Q9VGC3	Conserved oligomeric Golgi complex subunit 1
3	17K03_COLLAB-IT_CTRL_023.3277.3283.2	2	22	100	39300000	-1	1	0	0	0		281	(R)	SYHIFYQIMSGSVPGVK	(D)		20.13	956.94	1912.96	-0.0899	-47	P05661	Myosin heavy chain, muscle
4	17K03_COLLAB-IT_CTRL_013.3205.3213.2	2	21.5	100	27200000	-1	1	0	0	0		281	(R)	SYHIFYQIMSGSVPGVK	(D)		20.03	956.96	1912.96	-0.0499	-26.1	P05661	Myosin heavy chain, muscle
6	17K03_COLLAB-IT_CTRL_033.3225.3229.2	2	21.43	89.7	35100000	-1	1	0	0	0		281	(R)	SYHIFYQIMSGSVPGVK	(D)		19.92	956.97	1912.96	-0.0299	-15.6	P05661	Myosin heavy chain, muscle
7	17K03_COLLAB-IT_CTRL_011.3289.3301.0	3	21.37	97.6	20000000	-1	0	0	0	0		149	(R)	TTGIVLDSGDGVSHTVPIYEGYALPHAILR	(L)		20.59	1051.51	3151.64	0.8732	277	P10987	Actin-5C
8	17K03_COLLAB-IT_CTRL_022.3582.3587.0	3	21.27	95.6	29500000	-1	0	0	0	0		149	(R)	TTGIVLDSGDGVSHTVPIYEGFALPHAILR	(L)		22.02	1046.03	3135.65	0.4281	136.5	P83967	Actin, indirect flight muscle
9	17K03_COLLAB-IT_CTRL_031.3226.3232.0	4	21	95.8	21600000	-1	1	0	0	0		131	(R)	YFKPWFGDGLLISNGHHWR	(H)		20.03	583.47	2330.16	0.6964	298.8	Q9V3S0	Cytochrome P450 4g1
14	17K03_COLLAB-IT_CTRL_031.2511.2518.0	3	20.41	98.1	26600000	-1	1	0	0	0		89	(R)	GGSTWRPHVTPTGNVPQPNSPYLQTVTK	(T)		15.5	1007.19	3019.54	0.017	5.6	A1ZA47	PDZ and LIM domain protein Zasp
15	17K03_COLLAB-IT_CTRL_013.4020.4031.0	2	20.38	98.5	12700000	-1	1	0	0	0		190	(K)	TVLIMELINNVAK	(A)		25.17	729.42	1457.84	-0.0069	-4.7	Q05825	ATP synthase subunit beta, mitochondrial
17	17K03_COLLAB-IT_CTRL_032.2685.2685.0	3	20.16	92.8	19700000	-1	1	0	0	0		6	(K)	IHINIVVIGHVDSGK	(S)		16.5	534.66	1600.92	1.0485	654.5	P08736	Elongation factor 1-alpha 1
18	17K03_COLLAB-IT_CTRL_013.2650.2657.0	3	20.04	92.4	15800000	-1	1	0	0	0		6	(K)	IHINIVVIGHVDSGK	(S)		16.47	534.32	1600.92	0.0285	17.8	P08736	Elongation factor 1-alpha 1
20	17K03_COLLAB-IT_CTRL_021.2483.2513.0	4	19.94	98.6	129000000	-1	1	0	0	0		89	(R)	GGSTWRPHVTPTGNVPQPNSPYLQTVTK	(T)		15.31	755.68	3019.54	0.1597	52.9	A1ZA47	PDZ and LIM domain protein Zasp
21	17K03_COLLAB-IT_CTRL_011.2500.2504.0	4	19.93	98.2	95300000	-1	1	0	0	0		89	(R)	GGSTWRPHVTPTGNVPQPNSPYLQTVTK	(T)		15.51	755.79	3019.54	0.5997	198.6	A1ZA47	PDZ and LIM domain protein Zasp
22	17K03_COLLAB-IT_CTRL_023.2489.2505.0	3	19.81	97	14100000	-1	0	0	0	0		402	(K)	GIRPAINVGLSVSR	(V)		15.33	480.29	1438.85	0.0066	4.6	P35381	ATP synthase subunit alpha, mitochondrial
23	17K03_COLLAB-IT_CTRL_031.3531.3538.0	3	19.76	95.4	21400000	-1	0	0	0	0		149	(R)	TTGIVLDSGDGVSHTVPIYEGFALPHAILR	(L)		21.94	1045.92	3135.65	0.0981	31.3	P83967	Actin, indirect flight muscle
25	17K03_COLLAB-IT_CTRL_023.4080.4091.2	2	19.69	96.3	21300000	-1	1	0	0	0		190	(K)	TVLIMELINNVAK	(A)		25.24	729.42	1457.84	-0.0069	-4.7	Q05825	ATP synthase subunit beta, mitochondrial
27	17K03_COLLAB-IT_CTRL_033.4022.4041.2	2	19.67	95.8	13900000	-1	1	0	0	0		190	(K)	TVLIMELINNVAK	(A)		24.99	729.4	1457.84	-0.0469	-32.2	Q05825	ATP synthase subunit beta, mitochondrial
31	17K03_COLLAB-IT_CTRL_011.2800.2818.0	2	19.52	96.1	18800000	-1	1	0	0	0		241	(K)	LYCIYVAIGQK	(R)	C:Carbamidomethylation,	17.43	664.33	1327.71	-0.0551	-41.5	P35381	ATP synthase subunit alpha, mitochondrial
32	17K03_COLLAB-IT_CTRL_011.3234.3234.0	4	19.46	95.3	6020000	-1	1	0	0	0		131	(R)	YFKPWFGDGLLISNGHHWR	(H)		20.24	583.59	2330.16	1.1764	504.6	Q9V3S0	Cytochrome P450 4g1
33	17K03_COLLAB-IT_CTRL_032.3102.3102.0	3	19.4	98.7	21400000	-1	0	0	0	0		64	(R)	HYYWYLTNEGIEELR	(S)		19.16	662.69	1985.94	0.1162	58.5	Q9VWG3	40S ribosomal protein S10b
34	17K03_COLLAB-IT_CTRL_031.2871.2895.0	2	19.39	97.3	86100000	-1	0	0	0	0		240	(K)	SYELPDGQVITIGNER	(F)		17.78	895.92	1790.89	-0.0592	-33.1	P10987	Actin-5C
35	17K03_COLLAB-IT_CTRL_031.2832.2839.0	2	19.36	97.7	23500000	-1	1	0	0	0		218	(K)	TALAIDTIINQK	(R)		17.54	650.81	1300.75	-0.1344	-103.3	P35381	ATP synthase subunit alpha, mitochondrial
36	17K03_COLLAB-IT_CTRL_021.2662.2662.0	3	19.29	96.1	24600000	-1	1	0	0	0		6	(K)	IHINIVVIGHVDSGK	(S)		16.32	534.59	1600.92	0.8385	523.5	P08736	Elongation factor 1-alpha 1
37	17K03_COLLAB-IT_CTRL_031.2450.2469.0	3	19.25	96.2	24500000	-1	0	0	0	0		402	(K)	GIRPAINVGLSVSR	(V)		15.13	480.57	1438.85	0.8466	588	P35381	ATP synthase subunit alpha, mitochondrial
44	17K03_COLLAB-IT_CTRL_022.3150.3150.0	3	19.09	97.9	51000000	-1	0	0	0	0		64	(R)	HYYWYLTNEGIEELR	(S)		19.26	663	1985.94	1.0462	526.5	Q9VWG3	40S ribosomal protein S10b
45	17K03_COLLAB-IT_CTRL_011.2445.2456.0	3	18.92	98.8	16200000	-1	0	0	0	0		402	(K)	GIRPAINVGLSVSR	(V)		15.17	480.34	1438.85	0.1566	108.8	P35381	ATP synthase subunit alpha, mitochondrial
47	17K03_COLLAB-IT_CTRL_032.3960.3971.0	3	18.86	92.9	7690000	-1	0	0	0	0		210	(K)	SAHSIGLMWWLLAR	(E)		24.63	547.83	1640.87	0.6025	367	P38979	40S ribosomal protein SA
48	17K03_COLLAB-IT_CTRL_012.3293.3300.0	2	18.85	97	10400000	-1	1	0	0	0		340	(R)	TIQFVDWCPTGFK	(V)	C:Carbamidomethylation,	20.55	799.82	1598.77	-0.1345	-84.1	P06603	Tubulin alpha-1 chain
52	17K03_COLLAB-IT_CTRL_021.2872.2881.0	2	18.75	95.7	30400000	-1	1	0	0	0		218	(K)	TALAIDTIINQK	(R)		17.47	650.89	1300.75	0.0256	19.7	P35381	ATP synthase subunit alpha, mitochondrial
53	17K03_COLLAB-IT_CTRL_023.3623.3623.0	3	18.74	94.9	20200000	-1	2	0	0	0		128	(R)	KGGPGGIICNIGSVTGFNAIYQVPVYSGTK	(A)	C:Carbamidomethylation,	22.36	1018.86	3054.57	-0.0063	-2.1	P00334	Alcohol dehydrogenase
55	17K03_COLLAB-IT_CTRL_031.3307.3307.0	3	18.67	94.2	37000000	-1	0	0	0	0		149	(R)	TTGIVLDSGDGVSHTVPIYEGYALPHAILR	(L)		20.53	1051.21	3151.64	-0.0268	-8.5	P10987	Actin-5C
58	17K03_COLLAB-IT_CTRL_031.3930.3930.0	4	18.61	94.5	11600000	-1	0	0	0	0		621	(K)	GGQVFQFFYMVYPYHQPEVAQFTGYDPVVSCGVGHGSR	(Y)	C:Carbamidomethylation,	24.47	1078.1	4310.98	-1.607	-372.9	Q24388	Larval serum protein 2
60	17K03_COLLAB-IT_CTRL_033.2511.2529.0	2	18.53	87.2	21100000	-1	1	0	0	0		305	(K)	HALIIYDDLSK	(Q)		15.43	644.36	1287.69	0.0184	14.3	P35381	ATP synthase subunit alpha, mitochondrial
62	17K03_COLLAB-IT_CTRL_033.2844.2851.0	2	18.51	96	23100000	-1	1	0	0	0		241	(K)	LYCIYVAIGQK	(R)	C:Carbamidomethylation,	17.46	664.34	1327.71	-0.0351	-26.5	P35381	ATP synthase subunit alpha, mitochondrial
64	17K03_COLLAB-IT_CTRL_012.3986.3993.0	3	18.48	91.1	5820000	-1	1	0	0	0		86	(K)	NADILIFVVPHQFIPNFCK	(Q)	C:Carbamidomethylation,	24.97	758.15	2272.2	0.2407	105.9	P13706	Glycerol-3-phosphate dehydrogenase [NAD(+)], cytoplasmic
65	17K03_COLLAB-IT_CTRL_011.4412.4435.0	3	18.48	97.7	9820000	-1	1	0	0	0		105	(R)	TIAVNYTGLVNTTTAILDFWDKR	(K)		27.71	871.54	2612.37	0.2336	89.4	P00334	Alcohol dehydrogenase
67	17K03_COLLAB-IT_CTRL_011.2868.2888.2	2	18.36	96.5	49700000	-1	0	0	0	0		240	(K)	SYELPDGQVITIGNER	(F)		17.85	895.93	1790.89	-0.0392	-21.9	P10987	Actin-5C
68	17K03_COLLAB-IT_CTRL_022.2873.2891.0	2	18.36	96.2	27200000	-1	1	0	0	0		241	(K)	LYCIYVAIGQK	(R)	C:Carbamidomethylation,	17.56	664.34	1327.71	-0.0351	-26.5	P35381	ATP synthase subunit alpha, mitochondrial
69	17K03_COLLAB-IT_CTRL_012.3545.3545.0	3	18.32	96.3	11900000	-1	0	0	0	0		149	(R)	TTGIVLDSGDGVSHTVPIYEGFALPHAILR	(L)		22.18	1046.3	3135.65	1.2381	394.7	P83967	Actin, indirect flight muscle
70	17K03_COLLAB-IT_CTRL_023.3344.3344.0	4	18.31	94.9	35700000	-1	0	0	0	0		149	(R)	TTGIVLDSGDGVSHTVPIYEGYALPHAILR	(L)		20.6	789.21	3151.64	2.1759	689.9	P10987	Actin-5C
71	17K03_COLLAB-IT_CTRL_032.3744.3752.2	2	18.28	95.4	14500000	-1	0	0	0	0		230	(R)	LIGQIVSSITASLR	(F)		23.27	729.55	1457.87	0.2241	153.7	P06603	Tubulin alpha-1 chain
74	17K03_COLLAB-IT_CTRL_031.3336.3350.0	3	18.17	91.1	38800000	-1	0	0	0	0		977	(K)	FHLSRPFNFAVYLTTER	(K)		20.71	700.33	2098.09	0.8886	423.3	Q9V496	Apolipophorins
75	17K03_COLLAB-IT_CTRL_032.3771.3771.0	5	18.16	91.8	15600000	-1	1	0	0	0		146	(R)	AALPQHVVTMLNNMPTTLHPMSQFAAAVTALNHDSK	(F)		23.44	772.57	3856.93	1.8914	490.1	Q9W401	Probable citrate synthase, mitochondrial
79	17K03_COLLAB-IT_CTRL_032.2468.2489.0	2	18.08	95.7	22500000	-1	1	0	0	0		884	(K)	TALLDSLSGEK	(G)		15.18	567.28	1133.61	-0.0521	-46	P05661	Myosin heavy chain, muscle
80	17K03_COLLAB-IT_CTRL_022.2701.2707.2	2	18.07	93.1	25400000	-1	1	0	0	0		516	(K)	TSEQALLDTIAK	(D)		16.56	645.38	1289.69	0.058	45	P35381	ATP synthase subunit alpha, mitochondrial
81	17K03_COLLAB-IT_CTRL_031.3421.3427.2	2	18.07	94.9	42700000	-1	1	0	0	0		96	(R)	YFPTQALNFAFK	(D)		21.25	723.93	1446.74	0.1111	76.8	Q26365	ADP,ATP carrier protein
82	17K03_COLLAB-IT_CTRL_022.2474.2483.0	2	18.06	95.3	18700000	-1	1	0	0	0		884	(K)	TALLDSLSGEK	(G)		15.2	567.24	1133.61	-0.1321	-116.6	P05661	Myosin heavy chain, muscle
83	17K03_COLLAB-IT_CTRL_013.2448.2475.0	2	17.95	92.5	14900000	-1	1	0	0	0		884	(K)	TALLDSLSGEK	(G)		15.2	567.25	1133.61	-0.1121	-98.9	P05661	Myosin heavy chain, muscle
86	17K03_COLLAB-IT_CTRL_033.3580.3580.0	3	17.92	98.2	15000000	-1	1	0	0	0		76	(K)	HDLTPSFVPSPSNVPVWIIK	(S)		22.2	745.45	2233.2	1.1339	507.5	P06607	Vitellogenin-3
88	17K03_COLLAB-IT_CTRL_013.2843.2849.2	2	17.87	96.6	15100000	-1	0	0	0	0		217	(K)	TFLVWCNEEDHLR	(I)	C:Carbamidomethylation,	17.71	859.85	1718.8	-0.1028	-59.8	P48610	Arginine kinase
89	17K03_COLLAB-IT_CTRL_023.3385.3395.2	2	17.86	95.9	15700000	-1	0	0	0	0		783	(K)	IMSWMQAWAR	(G)		20.86	640.02	1279.61	-0.5747	-449.3	P05661	Myosin heavy chain, muscle
91	17K03_COLLAB-IT_CTRL_021.3776.3781.0	3	17.77	96.2	16100000	-1	1	0	0	0		227	(K)	TLIDALDAILPPARPTDK	(A)		23.13	640.71	1920.08	0.0354	18.4	P08736	Elongation factor 1-alpha 1
92	17K03_COLLAB-IT_CTRL_013.3755.3765.2	2	17.75	94.6	14200000	-1	0	0	0	0		230	(R)	LIGQIVSSITASLR	(F)		23.5	729.46	1457.87	0.0441	30.3	P06603	Tubulin alpha-1 chain
93	17K03_COLLAB-IT_CTRL_023.3799.3805.2	2	17.74	94.8	18100000	-1	0	0	0	0		230	(R)	LIGQIVSSITASLR	(F)		23.47	729.48	1457.87	0.0841	57.7	P06603	Tubulin alpha-1 chain
94	17K03_COLLAB-IT_CTRL_031.3276.3286.0	2	17.73	94.7	20200000	-1	1	0	0	0		340	(R)	TIQFVDWCPTGFK	(V)	C:Carbamidomethylation,	20.34	800.36	1598.77	0.9455	591.1	P06603	Tubulin alpha-1 chain
96	17K03_COLLAB-IT_CTRL_021.3769.3790.0	3	17.7	82.7	43400000	-1	1	0	0	0		233	(K)	GVPQEIIHLIGQGISAHVAGAAGNK	(Y)		23.08	813.17	2437.33	0.1644	67.5	P06607	Vitellogenin-3
97	17K03_COLLAB-IT_CTRL_023.2924.2932.2	2	17.69	96	18800000	-1	0	0	0	0		217	(K)	TFLVWCNEEDHLR	(I)	C:Carbamidomethylation,	17.95	859.95	1718.8	0.0972	56.6	P48610	Arginine kinase
102	17K03_COLLAB-IT_CTRL_023.3486.3493.0	2	17.56	94	36000000	-1	1	0	0	0		96	(R)	YFPTQALNFAFK	(D)		21.48	723.85	1446.74	-0.0489	-33.8	Q26365	ADP,ATP carrier protein
103	17K03_COLLAB-IT_CTRL_033.2221.2227.0	3	17.53	95.4	54600000	-1	0	0	0	0		86	(K)	IWHHTFYNELR	(V)		13.58	505.94	1515.75	0.0563	37.1	P10987	Actin-5C
104	17K03_COLLAB-IT_CTRL_023.3592.3592.0	3	17.52	90.1	26900000	-1	1	0	0	0		78	(R)	SGPFGQIFRPDNFVFGQSGAGNNWAK	(G)		22.17	933.86	2798.34	1.2221	436.5	Q24560	Tubulin beta-1 chain
106	17K03_COLLAB-IT_CTRL_022.2950.2967.2	2	17.46	96.3	69400000	-1	0	0	0	0		240	(K)	SYELPDGQVITIGNER	(F)		18.03	895.92	1790.89	-0.0592	-33.1	P10987	Actin-5C
110	17K03_COLLAB-IT_CTRL_011.2826.2832.0	2	17.35	97.4	14600000	-1	1	0	0	0		218	(K)	TALAIDTIINQK	(R)		17.59	650.88	1300.75	0.0056	4.3	P35381	ATP synthase subunit alpha, mitochondrial
114	17K03_COLLAB-IT_CTRL_033.2628.2648.2	2	17.28	91.7	26800000	-1	2	0	0	0		240	(K)	KLYCIYVAIGQK	(R)	C:Carbamidomethylation,	16.16	728.36	1455.8	-0.0901	-61.9	P35381	ATP synthase subunit alpha, mitochondrial
117	17K03_COLLAB-IT_CTRL_012.3272.3272.0	5	17.21	82.2	8440000	-1	2	0	0	0		66	(R)	GAELLQQVYHLSQIHHNVEPNYVPSGIQVYVPKPNGDK	(T)		20.41	854.7	4268.19	1.2822	300.3	P02843	Vitellogenin-1
118	17K03_COLLAB-IT_CTRL_023.2664.2671.2	2	17.21	88.3	16500000	-1	2	0	0	0		240	(K)	KLYCIYVAIGQK	(R)	C:Carbamidomethylation,	16.38	728.4	1455.8	-0.0101	-6.9	P35381	ATP synthase subunit alpha, mitochondrial
119	17K03_COLLAB-IT_CTRL_032.3325.3331.0	2	17.21	91.2	24100000	-1	0	0	0	0		783	(K)	IMSWMQAWAR	(G)		20.62	640.35	1279.61	0.0853	66.6	P05661	Myosin heavy chain, muscle
121	17K03_COLLAB-IT_CTRL_012.3370.3377.0	3	17.12	90.8	10700000	-1	0	0	0	0		977	(K)	FHLSRPFNFAVYLTTER	(K)		21.06	700.04	2098.09	0.0186	8.9	Q9V496	Apolipophorins
124	17K03_COLLAB-IT_CTRL_023.3354.3354.2	2	17.05	81.2	11500000	-1	1	0	0	0		213	(K)	GSVGFGSGLHGWAFTLK	(Q)		20.67	861.44	1720.88	0.9922	576.2	P13060	Elongation factor 2
125	17K03_COLLAB-IT_CTRL_033.2971.2984.2	2	17.05	94.3	16500000	-1	0	0	0	0		8	(K)	TVEQSLNFFGTDPER	(G)		18.25	870.33	1739.82	-0.1708	-98.2	P22700	Calcium-transporting ATPase sarcoplasmic/endoplasmic reticulum type
127	17K03_COLLAB-IT_CTRL_013.2658.2663.2	2	17	91.7	13300000	-1	1	0	0	0		516	(K)	TSEQALLDTIAK	(D)		16.52	645.37	1289.69	0.038	29.5	P35381	ATP synthase subunit alpha, mitochondrial
128	17K03_COLLAB-IT_CTRL_013.3415.3422.2	2	17	92.8	26900000	-1	1	0	0	0		96	(R)	YFPTQALNFAFK	(D)		21.35	723.94	1446.74	0.1311	90.6	Q26365	ADP,ATP carrier protein
135	17K03_COLLAB-IT_CTRL_033.2768.2774.2	2	16.85	93.5	15100000	-1	1	0	0	0		130	(R)	SMQGYPFNPCLTEAQYK	(E)	C:Carbamidomethylation,	17.04	1017.45	2033.91	-0.0168	-8.3	P48610	Arginine kinase
136	17K03_COLLAB-IT_CTRL_031.2829.2836.0	2	16.83	90	10200000	-1	0	0	0	0		210	(K)	LPVVAATIYCNTYR	(G)	C:Carbamidomethylation,	17.52	821.64	1640.85	1.4262	868.5	Q9W401	Probable citrate synthase, mitochondrial
137	17K03_COLLAB-IT_CTRL_033.3579.3586.0	3	16.79	91.1	16700000	-1	2	0	0	0		128	(R)	KGGPGGIICNIGSVTGFNAIYQVPVYSGTK	(A)	C:Carbamidomethylation,	22.19	1019.17	3054.57	0.9237	302.3	P00334	Alcohol dehydrogenase
138	17K03_COLLAB-IT_CTRL_011.3963.3966.0	3	16.75	95	4280000	-1	0	0	0	0		57	(R)	FFDMVEYFFHR	(G)		24.89	513.57	1537.69	1.0022	651.3	P54385	Glutamate dehydrogenase, mitochondrial
139	17K03_COLLAB-IT_CTRL_011.3330.3336.0	2	16.73	92.1	13700000	-1	0	0	0	0		783	(K)	IMSWMQAWAR	(G)		20.88	640.37	1279.61	0.1253	97.9	P05661	Myosin heavy chain, muscle
140	17K03_COLLAB-IT_CTRL_013.3508.3520.0	3	16.68	90.3	12700000	-1	0	0	0	0		263	(R)	LHFFMPGFAPLTSR	(G)		21.94	541.35	1620.84	1.1999	739.8	Q24560	Tubulin beta-1 chain
141	17K03_COLLAB-IT_CTRL_032.2872.2885.2	2	16.67	91.6	20200000	-1	0	0	0	0		217	(K)	TFLVWCNEEDHLR	(I)	C:Carbamidomethylation,	17.68	859.86	1718.8	-0.0828	-48.2	P48610	Arginine kinase
144	17K03_COLLAB-IT_CTRL_032.3097.3106.0	3	16.53	90.8	15400000	-1	2	0	0	0		440	(R)	KHFPSINWLISYSK	(Y)		19.13	573.97	1719.92	-0.0263	-15.3	P48602	V-type proton ATPase catalytic subunit A isoform 1
145	17K03_COLLAB-IT_CTRL_011.2703.2703.0	3	16.52	82.3	8010000	-1	2	0	0	0		105	(K)	HFCPNVPIILVGNKK	(D)	C:Carbamidomethylation,	16.78	579.98	1735.97	1.9578	1126.5	P48148	Ras-like GTP-binding protein Rho1
146	17K03_COLLAB-IT_CTRL_012.2964.2972.2	2	16.52	93.6	12500000	-1	0	0	0	0		8	(K)	TVEQSLNFFGTDPER	(G)		18.36	870.9	1739.82	0.9692	556.8	P22700	Calcium-transporting ATPase sarcoplasmic/endoplasmic reticulum type
147	17K03_COLLAB-IT_CTRL_033.3285.3293.2	2	16.47	93.7	7820000	-1	0	0	0	0		310	(R)	YLTVAAIFR	(G)		20.3	527.22	1053.61	-0.1764	-167.5	Q24560	Tubulin beta-1 chain
148	17K03_COLLAB-IT_CTRL_012.3303.3309.2	2	16.45	93.1	5760000	-1	0	0	0	0		310	(R)	YLTVAAIFR	(G)		20.61	527.3	1053.61	-0.0164	-15.6	Q24560	Tubulin beta-1 chain
149	17K03_COLLAB-IT_CTRL_022.4043.4063.0	3	16.45	91.1	16200000	-1	1	0	0	0		86	(K)	NADILIFVVPHQFIPNFCK	(Q)	C:Carbamidomethylation,	24.91	758.41	2272.2	1.0207	449	P13706	Glycerol-3-phosphate dehydrogenase [NAD(+)], cytoplasmic
150	17K03_COLLAB-IT_CTRL_023.2214.2223.0	3	16.42	95.2	52100000	-1	0	0	0	0		86	(K)	IWHHTFYNELR	(V)		13.59	505.97	1515.75	0.1463	96.5	P10987	Actin-5C
151	17K03_COLLAB-IT_CTRL_012.2514.2520.0	2	16.39	83.3	14000000	-1	1	0	0	0		305	(K)	HALIIYDDLSK	(Q)		15.52	644.36	1287.69	0.0184	14.3	P35381	ATP synthase subunit alpha, mitochondrial
152	17K03_COLLAB-IT_CTRL_033.3097.3103.2	2	16.37	90.2	86900000	-1	1	0	0	0		48	(K)	HSYTLFYFNVK	(A)		19.09	709.86	1418.71	0.0024	1.7	P41043	Glutathione S-transferase S1
154	17K03_COLLAB-IT_CTRL_021.3816.3816.0	4	16.33	84.1	29700000	-1	1	0	0	0		146	(R)	AALPQHVVTMLNNMPTTLHPMSQFAAAVTALNHDSK	(F)		23.38	965.3	3856.93	1.2486	323.6	Q9W401	Probable citrate synthase, mitochondrial
155	17K03_COLLAB-IT_CTRL_033.3971.3978.0	3	16.3	97.5	7840000	-1	0	0	0	0		57	(R)	FFDMVEYFFHR	(G)		24.67	513.27	1537.69	0.1022	66.4	P54385	Glutamate dehydrogenase, mitochondrial
157	17K03_COLLAB-IT_CTRL_021.3318.3320.2	2	16.26	95.2	22700000	-1	1	0	0	0		340	(R)	TIQFVDWCPTGFK	(V)	C:Carbamidomethylation,	20.24	799.88	1598.77	-0.0145	-9	P06603	Tubulin alpha-1 chain
158	17K03_COLLAB-IT_CTRL_011.2192.2197.0	3	16.25	92.9	58500000	-1	0	0	0	0		86	(K)	IWHHTFYNELR	(V)		13.6	505.93	1515.75	0.0263	17.3	P10987	Actin-5C
159	17K03_COLLAB-IT_CTRL_021.4502.4509.0	3	16.25	94	14300000	-1	1	0	0	0		105	(R)	TIAVNYTGLVNTTTAILDFWDKR	(K)		27.71	871.5	2612.37	0.1136	43.5	P00334	Alcohol dehydrogenase
160	17K03_COLLAB-IT_CTRL_033.3434.3434.0	2	16.23	83.3	8070000	-1	1	0	0	0		9	(K)	NVIFVAGLGGIGLDTSK	(E)		21.27	832.02	1660.93	2.1059	1266.3	P00334	Alcohol dehydrogenase
161	17K03_COLLAB-IT_CTRL_032.3527.3527.0	3	16.17	89.3	19300000	-1	0	0	0	0		263	(R)	LHFFMPGFAPLTSR	(G)		21.9	541.32	1620.84	1.1099	684.3	Q24560	Tubulin beta-1 chain
162	17K03_COLLAB-IT_CTRL_022.3395.3411.0	3	16.14	89.4	23000000	-1	0	0	0	0		977	(K)	FHLSRPFNFAVYLTTER	(K)		20.81	700.4	2098.09	1.0986	523.3	Q9V496	Apolipophorins
163	17K03_COLLAB-IT_CTRL_022.3656.3663.2	2	16.13	90.8	25100000	-1	0	0	0	0		265	(R)	LGFLTFCPTNLGTTIR	(A)	C:Carbamidomethylation,	22.48	905.99	1810.95	0.0207	11.4	P48610	Arginine kinase
168	17K03_COLLAB-IT_CTRL_031.4010.4021.0	3	15.94	90.3	12000000	-1	1	0	0	0		86	(K)	NADILIFVVPHQFIPNFCK	(Q)	C:Carbamidomethylation,	24.97	758.67	2272.2	1.8007	791.9	P13706	Glycerol-3-phosphate dehydrogenase [NAD(+)], cytoplasmic
169	17K03_COLLAB-IT_CTRL_031.3240.3240.2	2	15.94	89	9250000	-1	1	0	0	0		271	(K)	TFYLIPLAANNK	(D)		20.11	683.06	1364.76	0.3555	260.4	P19107	Phosrestin-1
172	17K03_COLLAB-IT_CTRL_033.2831.2831.0	2	15.88	89.1	7190000	-1	0	0	0	0		151	(K)	TLYDDVDVVTIR	(E)		17.38	705.53	1408.73	1.3209	936.8	Q9VWH4	Probable isocitrate dehydrogenase [NAD] subunit alpha, mitochondrial
173	17K03_COLLAB-IT_CTRL_031.3261.3261.0	2	15.87	88.6	10700000	-1	0	0	0	0		365	(R)	AIAELGIYPAVDPLDSTSR	(I)		20.24	995.3	1988.03	1.5592	783.7	Q05825	ATP synthase subunit beta, mitochondrial
174	17K03_COLLAB-IT_CTRL_031.2984.3008.0	3	15.83	94.3	15400000	-1	0	0	0	0		483	(R)	HYYSFIPFSAGPR	(S)		18.47	514.59	1541.75	0.0019	1.2	Q9V3S0	Cytochrome P450 4g1
177	17K03_COLLAB-IT_CTRL_023.3131.3131.0	4	15.8	87.9	11600000	-1	1	0	0	0		336	(K)	GAADFTAQVIVLNHPGQIANGYTPVLDCHTAHIACK	(F)	C:Carbamidomethylation,	19.22	966.26	3859.9	2.1175	548.3	P08736	Elongation factor 1-alpha 1
180	17K03_COLLAB-IT_CTRL_011.3912.3912.0	4	15.69	85.3	7060000	-1	0	0	0	0		621	(K)	GGQVFQFFYMVYPYHQPEVAQFTGYDPVVSCGVGHGSR	(Y)	C:Carbamidomethylation,	24.56	1079	4310.98	1.993	462.1	Q24388	Larval serum protein 2
181	17K03_COLLAB-IT_CTRL_011.3436.3444.2	2	15.63	88.2	6650000	-1	1	0	0	0		9	(K)	NVIFVAGLGGIGLDTSK	(E)		21.55	831.01	1660.93	0.0859	51.7	P00334	Alcohol dehydrogenase
182	17K03_COLLAB-IT_CTRL_013.3066.3075.2	2	15.62	93.2	8550000	-1	1	0	0	0		135	(R)	EHALLAFTLGVK	(Q)		19.11	649.96	1298.75	0.166	127.8	P08736	Elongation factor 1-alpha 1
183	17K03_COLLAB-IT_CTRL_032.3696.3705.2	2	15.62	90.2	9130000	-1	1	0	0	0		386	(K)	LLAILSLNIVK	(S)		22.97	599.45	1196.8	1.0951	914.1	Q9V496	Apolipophorins
185	17K03_COLLAB-IT_CTRL_011.3240.3240.0	2	15.61	94.6	5070000	-1	1	0	0	0		271	(K)	TFYLIPLAANNK	(D)		20.28	683.9	1364.76	2.0355	1489.2	P19107	Phosrestin-1
186	17K03_COLLAB-IT_CTRL_031.3405.3419.2	2	15.61	88.8	12900000	-1	1	0	0	0		57	(K)	VTVTFYPYDVTVPIAETTK	(L)		21.15	1072.56	2144.12	-0.0034	-1.6	P00334	Alcohol dehydrogenase
188	17K03_COLLAB-IT_CTRL_013.2738.2748.0	2	15.58	92.9	8150000	-1	1	0	0	0		130	(R)	SMQGYPFNPCLTEAQYK	(E)	C:Carbamidomethylation,	17.03	1017.43	2033.91	-0.0568	-27.9	P48610	Arginine kinase
192	17K03_COLLAB-IT_CTRL_031.2928.2928.0	4	15.52	79.8	14800000	-1	1	0	0	0		440	(R)	INMAHLSIVGSHAVNGVAAIHSQILK	(D)		18.12	670.75	2680.47	-0.4934	-184.1	Q9XTL9	Glycogen phosphorylase
193	17K03_COLLAB-IT_CTRL_013.3534.3534.0	3	15.51	88	21000000	-1	1	0	0	0		78	(R)	SGPFGQIFRPDNFVFGQSGAGNNWAK	(G)		22.11	934.05	2798.34	1.7921	640	Q24560	Tubulin beta-1 chain
195	17K03_COLLAB-IT_CTRL_033.4092.4092.0	4	15.49	90.2	5900000	-1	0	0	0	0		236	(R)	LVELTNTVNVPQEIIHLIGSGPAAHVAGVAGR	(Q)		25.44	809.19	3232.78	0.9581	296.3	P02844	Vitellogenin-2
196	17K03_COLLAB-IT_CTRL_021.2217.2230.2	2	15.42	92.1	20900000	-1	1	0	0	0		8	(R)	TFIMVKPDGVQR	(G)		13.77	695.86	1390.75	-0.0384	-27.6	P08879	Nucleoside diphosphate kinase
197	17K03_COLLAB-IT_CTRL_011.3610.3616.2	2	15.4	91.7	11600000	-1	0	0	0	0		265	(R)	LGFLTFCPTNLGTTIR	(A)	C:Carbamidomethylation,	22.67	906.02	1810.95	0.0807	44.6	P48610	Arginine kinase
198	17K03_COLLAB-IT_CTRL_031.2576.2582.2	2	15.36	84.8	12300000	-1	1	0	0	0		192	(K)	VIAYFATVGASK	(K)		15.9	613.78	1226.68	-0.1252	-102.1	P05661	Myosin heavy chain, muscle
199	17K03_COLLAB-IT_CTRL_012.3312.3312.0	3	15.35	95.7	3270000	-1	1	0	0	0		213	(K)	GSVGFGSGLHGWAFTLK	(Q)		20.67	574.57	1720.88	0.8149	473.3	P13060	Elongation factor 2
201	17K03_COLLAB-IT_CTRL_023.2532.2532.0	2	15.26	85.9	20500000	-1	1	0	0	0		305	(K)	HALIIYDDLSK	(Q)		15.59	644.29	1287.69	-0.1216	-94.4	P35381	ATP synthase subunit alpha, mitochondrial
202	17K03_COLLAB-IT_CTRL_013.2322.2331.0	2	15.25	88.3	16500000	-1	0	0	0	0		87	(R)	TIAMDGTEGLVR	(G)		14.42	632.33	1262.64	1.0118	800.7	Q05825	ATP synthase subunit beta, mitochondrial
204	17K03_COLLAB-IT_CTRL_033.2678.2697.2	2	15.2	95.3	21900000	-1	1	0	0	0		516	(K)	TSEQALLDTIAK	(D)		16.47	645.34	1289.69	-0.022	-17.1	P35381	ATP synthase subunit alpha, mitochondrial
206	17K03_COLLAB-IT_CTRL_021.2421.2450.3	3	15.17	91.2	52000000	-1	1	0	0	0		158	(K)	TFDNDGLIDGDKFR	(E)		14.95	538.54	1612.76	0.8453	523.8	P18432	Myosin regulatory light chain 2
208	17K03_COLLAB-IT_CTRL_032.4653.4667.0	2	15.16	96.6	8470000	-1	1	0	0	0		46	(R)	LGFLPEEWFQFFYNK	(T)		28.99	982.94	1964.96	-0.0854	-43.5	Q94516	ATP synthase subunit b, mitochondrial
210	17K03_COLLAB-IT_CTRL_011.2623.2623.0	3	15.13	90.1	11600000	-1	2	0	0	0		240	(K)	KLYCIYVAIGQK	(R)	C:Carbamidomethylation,	16.28	485.85	1455.8	-0.2674	-183.7	P35381	ATP synthase subunit alpha, mitochondrial
211	17K03_COLLAB-IT_CTRL_033.3119.3119.2	2	15.13	87.4	7140000	-1	1	0	0	0		230	(R)	SIDSSLDWSANFVK	(M)		19.23	785.22	1568.76	0.6736	429.2	Q9W401	Probable citrate synthase, mitochondrial
214	17K03_COLLAB-IT_CTRL_032.3760.3767.2	2	15.11	84.4	14100000	-1	1	0	0	0		108	(R)	GLFNFFYYAK	(D)		23.37	635.34	1269.63	0.0425	33.4	P11995	Larval serum protein 1 alpha chain
215	17K03_COLLAB-IT_CTRL_023.3578.3578.0	3	15.03	81.9	13200000	-1	0	0	0	0		263	(R)	LHFFMPGFAPLTSR	(G)		22.08	541.01	1620.84	0.1799	111	Q24560	Tubulin beta-1 chain
216	17K03_COLLAB-IT_CTRL_022.3486.3486.2	2	15.02	83.6	21100000	-1	1	0	0	0		9	(K)	NVIFVAGLGGIGLDTSK	(E)		21.38	831.44	1660.93	0.9459	569.2	P00334	Alcohol dehydrogenase
217	17K03_COLLAB-IT_CTRL_031.3149.3149.2	2	15.01	95.5	12500000	-1	1	0	0	0		230	(K)	TYAYLTPDLWK	(E)		19.52	685.79	1370.7	-0.1264	-92.2	P31009	40S ribosomal protein S2
218	17K03_COLLAB-IT_CTRL_031.3121.3121.2	2	14.99	85.5	5760000	-1	1	0	0	0		261	(R)	MMNIILGMTSK	(V)		19.34	620.4	1238.63	1.1622	937.4	Q9V3S0	Cytochrome P450 4g1
221	17K03_COLLAB-IT_CTRL_032.2461.2461.2	2	14.87	88.5	22800000	-1	1	0	0	0		158	(K)	TFDNDGLIDGDKFR	(E)		15.14	806.89	1612.76	0.0125	7.8	P18432	Myosin regulatory light chain 2
222	17K03_COLLAB-IT_CTRL_033.3383.3383.0	4	14.85	93.4	6790000	-1	0	0	0	0		200	(R)	EDLGINLHHWHWHLVYPFEASDR	(S)		20.94	718.88	2871.38	1.1232	391	Q9V521	Phenoloxidase 2
223	17K03_COLLAB-IT_CTRL_012.3098.3104.2	2	14.83	83	48400000	-1	1	0	0	0		48	(K)	HSYTLFYFNVK	(A)		19.24	709.93	1418.71	0.1424	100.4	P41043	Glutathione S-transferase S1
224	17K03_COLLAB-IT_CTRL_013.1681.1685.0	3	14.8	77	6410000	-1	1	0	0	0		35	(R)	HLHYTLVK	(D)		10.35	337.55	1010.58	0.0573	56.7	Q9XTL9	Glycogen phosphorylase
226	17K03_COLLAB-IT_CTRL_033.4438.4451.0	3	14.79	95.9	6300000	-1	1	0	0	0		105	(R)	TIAVNYTGLVNTTTAILDFWDKR	(K)		27.62	871.48	2612.37	0.0536	20.5	P00334	Alcohol dehydrogenase
227	17K03_COLLAB-IT_CTRL_013.3136.3136.2	2	14.77	91.9	9510000	-1	1	0	0	0		230	(K)	TYAYLTPDLWK	(E)		19.55	685.85	1370.7	-0.0064	-4.6	P31009	40S ribosomal protein S2
228	17K03_COLLAB-IT_CTRL_032.2917.2921.2	2	14.73	83.6	8380000	-1	0	0	0	0		255	(K)	SHLLFFVSR	(E)		17.96	553.26	1105.62	-0.1026	-92.8	P54399	Protein disulfide-isomerase
229	17K03_COLLAB-IT_CTRL_033.1713.1716.0	3	14.72	78.1	5670000	-1	1	0	0	0		35	(R)	HLHYTLVK	(D)		10.35	337.48	1010.58	-0.1527	-151.2	Q9XTL9	Glycogen phosphorylase
231	17K03_COLLAB-IT_CTRL_032.3123.3123.0	3	14.7	86.1	11700000	-1	2	0	0	0		101	(R)	TNYYDDVIDYIDKK	(Q)		19.29	588.83	1764.83	-0.3572	-202.5	P35554	Flightin
232	17K03_COLLAB-IT_CTRL_031.1593.1600.0	2	14.68	76.6	17100000	-1	1	0	0	0		41	(R)	HQGVMVGMGQK	(D)		9.75	586.31	1171.57	0.0417	35.6	P10987	Actin-5C
233	17K03_COLLAB-IT_CTRL_032.3601.3619.0	2	14.68	91.8	21600000	-1	0	0	0	0		265	(R)	LGFLTFCPTNLGTTIR	(A)	C:Carbamidomethylation,	22.37	905.84	1810.95	-0.2793	-154.2	P48610	Arginine kinase
234	17K03_COLLAB-IT_CTRL_023.1690.1697.0	3	14.67	74.3	6090000	-1	1	0	0	0		35	(R)	HLHYTLVK	(D)		10.3	337.51	1010.58	-0.0627	-62.1	Q9XTL9	Glycogen phosphorylase
235	17K03_COLLAB-IT_CTRL_022.1605.1609.0	3	14.63	60.8	8800000	-1	1	0	0	0		41	(R)	HQGVMVGMGQK	(D)		9.79	391.3	1171.57	0.3144	268.3	P10987	Actin-5C
236	17K03_COLLAB-IT_CTRL_022.1751.1751.0	3	14.62	84.8	2140000	-1	1	0	0	0		2099	(K)	HFHPECFTCGQCGK	(I)	C:Carbamidomethylation,	10.7	589.49	1764.7	1.7515	991.5	A1ZA47	PDZ and LIM domain protein Zasp
238	17K03_COLLAB-IT_CTRL_012.3122.3125.2	2	14.57	92.1	13000000	-1	0	0	0	0		133	(R)	TGAIVDVPVGDELLGR	(V)		19.39	805.88	1610.88	-0.1221	-75.8	P35381	ATP synthase subunit alpha, mitochondrial
239	17K03_COLLAB-IT_CTRL_031.1887.1889.2	2	14.57	85.7	4660000	-1	0	0	0	0		198	(R)	GYSFTTTAER	(E)		11.61	566.77	1132.53	0.0058	5.1	P10987	Actin-5C
240	17K03_COLLAB-IT_CTRL_013.2262.2262.0	3	14.56	80.9	6730000	-1	0	0	0	0		203	(K)	AHGGYSVFAGVGER	(T)		14.03	470.08	1406.68	1.5443	1096.6	Q05825	ATP synthase subunit beta, mitochondrial
242	17K03_COLLAB-IT_CTRL_021.3149.3161.2	2	14.53	91.6	35800000	-1	1	0	0	0		247	(R)	YWLCVAYGPSIK	(I)	C:Carbamidomethylation,	19.18	728.85	1456.73	-0.0366	-25.1	O18640	Guanine nucleotide-binding protein subunit beta-like protein
243	17K03_COLLAB-IT_CTRL_033.3077.3077.0	4	14.52	82.8	5970000	-1	2	0	0	0		395	(K)	VKNPWPNVDAHSGVLLQYYGMK	(E)		18.92	629.91	2516.28	0.3427	136.2	Q9W401	Probable citrate synthase, mitochondrial
244	17K03_COLLAB-IT_CTRL_033.3369.3369.0	2	14.49	87.9	7530000	-1	0	0	0	0		83	(R)	VYYLSLEYYMGR	(S)		20.85	779.32	1556.74	0.8873	569.7	Q9XTL9	Glycogen phosphorylase
245	17K03_COLLAB-IT_CTRL_031.3094.3098.2	2	14.47	90.5	22200000	-1	1	0	0	0		247	(R)	YWLCVAYGPSIK	(I)	C:Carbamidomethylation,	19.17	728.87	1456.73	0.0034	2.3	O18640	Guanine nucleotide-binding protein subunit beta-like protein
246	17K03_COLLAB-IT_CTRL_033.3406.3411.2	2	14.45	80.8	6410000	-1	1	0	0	0		103	(K)	GMALNLEPDNVGVVVFGNDK	(L)		21.09	1044.47	2088.04	-0.1103	-52.8	P35381	ATP synthase subunit alpha, mitochondrial
247	17K03_COLLAB-IT_CTRL_033.2764.2764.0	2	14.43	87.6	7210000	-1	1	0	0	0		335	(R)	SLPSVETLGCTSVICSDK	(T)	C:Carbamidomethylation,	17.02	977.16	1952.93	0.3824	195.8	P22700	Calcium-transporting ATPase sarcoplasmic/endoplasmic reticulum type
250	17K03_COLLAB-IT_CTRL_013.1592.1615.0	2	14.36	81.4	9920000	-1	1	0	0	0		41	(R)	HQGVMVGMGQK	(D)		9.79	586.28	1171.57	-0.0183	-15.7	P10987	Actin-5C
251	17K03_COLLAB-IT_CTRL_013.2181.2181.0	2	14.35	85.8	5340000	-1	1	0	0	0		351	(R)	ITAAVMHMGGMK	(F)		13.51	624.78	1246.61	1.9422	1555.6	P05661	Myosin heavy chain, muscle
252	17K03_COLLAB-IT_CTRL_022.4021.4021.2	2	14.35	89	7000000	-1	1	0	0	0		96	(K)	LLSGVTIAQGGVLPNIQAVLLPK	(K)		24.77	1151.63	2301.39	0.8623	374.5	P84051	Histone H2A
254	17K03_COLLAB-IT_CTRL_022.3129.3135.2	2	14.34	83.6	102000000	-1	1	0	0	0		48	(K)	HSYTLFYFNVK	(A)		19.14	709.9	1418.71	0.0824	58.1	P41043	Glutathione S-transferase S1
255	17K03_COLLAB-IT_CTRL_011.3735.3735.0	5	14.32	93.5	5370000	-1	1	0	0	0		620	(K)	KGGQVFQFFYMVYPYHQPEVAQFTGYDPVVSCGVGHGSR	(Y)	C:Carbamidomethylation,	23.45	888.94	4439.08	1.5908	358.2	Q24388	Larval serum protein 2
256	17K03_COLLAB-IT_CTRL_032.3870.3876.0	3	14.24	81.2	13400000	-1	0	0	0	0		217	(K)	LTTPTYGDLNHLVSLTMSGVTTCLR	(F)	C:Carbamidomethylation,	24.06	917.43	2750.39	-0.1097	-39.9	Q24560	Tubulin beta-1 chain
258	17K03_COLLAB-IT_CTRL_023.1904.1912.2	2	14.21	84.3	3620000	-1	0	0	0	0		198	(R)	GYSFTTTAER	(E)		11.63	566.71	1132.53	-0.1142	-100.9	P10987	Actin-5C
260	17K03_COLLAB-IT_CTRL_012.2458.2458.2	2	14.2	85.1	15800000	-1	1	0	0	0		158	(K)	TFDNDGLIDGDKFR	(E)		15.18	806.89	1612.76	0.0125	7.8	P18432	Myosin regulatory light chain 2
261	17K03_COLLAB-IT_CTRL_012.2244.2249.0	2	14.17	88.3	7380000	-1	0	0	0	0		39	(K)	TFTAWCNSHLR	(K)	C:Carbamidomethylation,	13.85	696.8	1392.65	-0.055	-39.5	P18091	Alpha-actinin, sarcomeric
262	17K03_COLLAB-IT_CTRL_022.2546.2546.2	2	14.15	90.4	16300000	-1	0	0	0	0		104	(K)	TVAPLNEMIQR	(L)		15.63	636.86	1271.68	1.0351	813.3	P02843	Vitellogenin-1
264	17K03_COLLAB-IT_CTRL_023.3500.3500.0	2	14.07	85.7	15000000	-1	0	0	0	0		417	(K)	EMNYYTVLFGVSR	(A)		21.57	789.88	1578.76	-0.0094	-5.9	Q9W401	Probable citrate synthase, mitochondrial
265	17K03_COLLAB-IT_CTRL_021.2771.2775.0	2	14.07	88.4	33900000	-1	1	0	0	0		130	(R)	SMQGYPFNPCLTEAQYK	(E)	C:Carbamidomethylation,	16.91	1017.39	2033.91	-0.1368	-67.3	P48610	Arginine kinase
266	17K03_COLLAB-IT_CTRL_032.2566.2566.0	2	14.02	89.2	25200000	-1	1	0	0	0		364	(R)	SFPAVPANSLQQYK	(Q)		15.77	776.33	1549.8	1.8518	1193.4	P02843	Vitellogenin-1
267	17K03_COLLAB-IT_CTRL_021.3954.3954.0	4	14.01	80	7730000	-1	0	0	0	0		621	(K)	GGQVFQFFYMVYPYHQPEVAQFTGYDPVVSCGVGHGSR	(Y)	C:Carbamidomethylation,	24.26	1079.11	4310.98	2.433	564.1	Q24388	Larval serum protein 2
268	17K03_COLLAB-IT_CTRL_022.3506.3513.3	3	14	88.6	42700000	-1	1	0	0	0		204	(K)	HMVNWITTNVLASISPQQEK	(E)		21.51	766.07	2296.18	0.02	8.7	Q94516	ATP synthase subunit b, mitochondrial
272	17K03_COLLAB-IT_CTRL_011.2560.2583.0	2	13.95	72.7	12100000	-1	1	0	0	0		192	(K)	VIAYFATVGASK	(K)		15.89	613.86	1226.68	0.0348	28.3	P05661	Myosin heavy chain, muscle
274	17K03_COLLAB-IT_CTRL_011.3710.3710.2	2	13.93	83.7	4380000	-1	1	0	0	0		386	(K)	LLAILSLNIVK	(S)		23.3	598.97	1196.8	0.1351	112.8	Q9V496	Apolipophorins
275	17K03_COLLAB-IT_CTRL_031.3451.3468.0	3	13.93	87.5	37700000	-1	1	0	0	0		204	(K)	HMVNWITTNVLASISPQQEK	(E)		21.44	766.15	2296.18	0.26	113.2	Q94516	ATP synthase subunit b, mitochondrial
277	17K03_COLLAB-IT_CTRL_032.3753.3753.0	4	13.92	75.6	11600000	-1	1	0	0	0		233	(K)	GVPQEIIHLIGQGISAHVAGAAGNK	(Y)		23.33	610.62	2437.33	2.1272	872	P06607	Vitellogenin-3
278	17K03_COLLAB-IT_CTRL_032.3531.3531.0	3	13.85	84.2	27700000	-1	1	0	0	0		78	(R)	SGPFGQIFRPDNFVFGQSGAGNNWAK	(G)		21.93	933.85	2798.34	1.1921	425.8	Q24560	Tubulin beta-1 chain
279	17K03_COLLAB-IT_CTRL_032.3104.3122.2	2	13.85	93.3	30100000	-1	0	0	0	0		133	(R)	TGAIVDVPVGDELLGR	(V)		19.17	805.9	1610.88	-0.0821	-51	P35381	ATP synthase subunit alpha, mitochondrial
280	17K03_COLLAB-IT_CTRL_031.4527.4527.0	4	13.84	82.5	2560000	-1	2	0	0	0		92	(R)	KDPFILEILQYVYNISPEVHK	(N)		28.23	637.37	2545.37	1.0881	427.3	Q9XZH6	V-type proton ATPase subunit G
281	17K03_COLLAB-IT_CTRL_013.3123.3130.2	2	13.82	91.5	5880000	-1	1	0	0	0		122	(K)	LLTIAFNTLK	(K)		19.47	567.3	1133.69	-0.1001	-88.3	P55841	60S ribosomal protein L14
282	17K03_COLLAB-IT_CTRL_011.2245.2245.2	2	13.82	85.8	9130000	-1	1	0	0	0		8	(R)	TFIMVKPDGVQR	(G)		13.94	696.54	1390.75	1.3216	949.4	P08879	Nucleoside diphosphate kinase
284	17K03_COLLAB-IT_CTRL_031.2542.2547.0	2	13.8	87.2	19200000	-1	0	0	0	0		104	(K)	TVAPLNEMIQR	(L)		15.69	636.55	1271.68	0.4151	326.3	P02843	Vitellogenin-1
286	17K03_COLLAB-IT_CTRL_013.2520.2523.2	2	13.75	91.5	14800000	-1	0	0	0	0		104	(K)	TVAPLNEMIQR	(L)		15.65	636.32	1271.68	-0.0449	-35.3	P02843	Vitellogenin-1
287	17K03_COLLAB-IT_CTRL_032.2152.2152.0	3	13.75	91.9	22900000	-1	0	0	0	0		86	(K)	VWHHTFYNELR	(V)		13.23	501.39	1501.73	0.4219	280.9	P02574	Actin, larval muscle
290	17K03_COLLAB-IT_CTRL_011.3094.3098.2	2	13.66	93.5	13900000	-1	1	0	0	0		247	(R)	YWLCVAYGPSIK	(I)	C:Carbamidomethylation,	19.3	728.88	1456.73	0.0234	16.1	O18640	Guanine nucleotide-binding protein subunit beta-like protein
292	17K03_COLLAB-IT_CTRL_021.1717.1730.2	2	13.65	92.2	6520000	-1	0	0	0	0		1689	(R)	TLLEQADR	(G)		10.58	473.23	945.5	-0.0473	-50	P05661	Myosin heavy chain, muscle
293	17K03_COLLAB-IT_CTRL_021.2565.2565.0	2	13.63	87.6	15900000	-1	1	0	0	0		192	(K)	VIAYFATVGASK	(K)		15.78	614.16	1226.68	0.6348	517.2	P05661	Myosin heavy chain, muscle
294	17K03_COLLAB-IT_CTRL_011.3091.3091.0	3	13.62	81.7	8160000	-1	2	0	0	0		440	(R)	KHFPSINWLISYSK	(Y)		19.28	574.3	1719.92	0.9637	560	P48602	V-type proton ATPase catalytic subunit A isoform 1
295	17K03_COLLAB-IT_CTRL_022.3130.3130.0	3	13.61	83.9	26400000	-1	2	0	0	0		440	(R)	KHFPSINWLISYSK	(Y)		19.14	574.03	1719.92	0.1537	89.4	P48602	V-type proton ATPase catalytic subunit A isoform 1
296	17K03_COLLAB-IT_CTRL_031.2712.2712.2	2	13.61	84.5	8150000	-1	1	0	0	0		805	(K)	SCLVSLGYSIGK	(D)	C:Carbamidomethylation,	16.75	643.4	1283.67	2.1263	1653.7	P18091	Alpha-actinin, sarcomeric
298	17K03_COLLAB-IT_CTRL_033.3412.3412.0	2	13.56	91.8	7660000	-1	0	0	0	0		259	(R)	VALTGLTVAEYFR	(D)		21.12	720.39	1439.79	-0.0166	-11.5	Q05825	ATP synthase subunit beta, mitochondrial
299	17K03_COLLAB-IT_CTRL_021.4145.4145.0	4	13.55	78.1	9790000	-1	0	0	0	0		236	(R)	LVELTNTVNVPQEIIHLIGSGPAAHVAGVAGR	(Q)		25.46	809.05	3232.78	0.3981	123.1	P02844	Vitellogenin-2
300	17K03_COLLAB-IT_CTRL_032.3145.3145.2	2	13.55	95	9880000	-1	1	0	0	0		122	(K)	LLTIAFNTLK	(K)		19.42	567.86	1133.69	1.0199	898.8	P55841	60S ribosomal protein L14
301	17K03_COLLAB-IT_CTRL_031.2790.2790.0	4	13.55	81.3	15300000	-1	1	0	0	0		96	(K)	TDKHPASNFGDVSTFGNVDPTNEYVISTR	(V)		17.28	793.14	3168.49	1.0513	331.7	P48610	Arginine kinase
302	17K03_COLLAB-IT_CTRL_021.3748.3748.2	2	13.53	84.5	16200000	-1	1	0	0	0		145	(K)	TYGFDGLDLGWQFPK	(N)		22.95	873.06	1743.84	1.275	730.6	Q9W303	Chitinase-like protein Idgf4
303	17K03_COLLAB-IT_CTRL_031.3808.3808.2	2	13.52	79.1	4210000	-1	1	0	0	0		217	(K)	LCYVALDFEQEMATAAASTSLEK	(S)	C:Carbamidomethylation,	23.68	1274.97	2548.2	0.7382	289.6	P53501	Actin-57B
304	17K03_COLLAB-IT_CTRL_033.3043.3043.0	4	13.51	85.4	8930000	-1	1	0	0	0		128	(K)	AYHAGMCFMNSNLQLVQHSVKV	(-)	C:Carbamidomethylation,	18.7	634.86	2534.21	2.2081	870.5	Q9VAI6	General odorant-binding protein 99b
307	17K03_COLLAB-IT_CTRL_022.3762.3762.2	2	13.44	84.9	11200000	-1	1	0	0	0		386	(K)	LLAILSLNIVK	(S)		23.15	598.89	1196.8	-0.0249	-20.8	Q9V496	Apolipophorins
309	17K03_COLLAB-IT_CTRL_011.3435.3456.0	2	13.4	85.2	13800000	-1	0	0	0	0		417	(K)	EMNYYTVLFGVSR	(A)		21.54	789.92	1578.76	0.0706	44.7	Q9W401	Probable citrate synthase, mitochondrial
310	17K03_COLLAB-IT_CTRL_013.3105.3105.0	2	13.4	79.3	8220000	-1	2	0	0	0		101	(R)	TNYYDDVIDYIDKK	(Q)		19.36	883.64	1764.83	1.4401	815.3	P35554	Flightin
311	17K03_COLLAB-IT_CTRL_022.3466.3466.2	2	13.39	82.3	10700000	-1	1	0	0	0		57	(K)	VTVTFYPYDVTVPIAETTK	(L)		21.26	1073.02	2144.12	0.9166	427.3	P00334	Alcohol dehydrogenase
312	17K03_COLLAB-IT_CTRL_011.3459.3459.0	3	13.33	84.6	13600000	-1	1	0	0	0		204	(K)	HMVNWITTNVLASISPQQEK	(E)		21.69	766.47	2296.18	1.22	531	Q94516	ATP synthase subunit b, mitochondrial
313	17K03_COLLAB-IT_CTRL_012.2284.2284.2	2	13.31	90.1	11700000	-1	0	0	0	0		301	(R)	TYYGVPQWHR	(E)		14.1	653.81	1306.63	-0.02	-15.3	Q24388	Larval serum protein 2
314	17K03_COLLAB-IT_CTRL_033.2901.2901.0	2	13.31	85.8	19700000	-1	1	0	0	0		199	(K)	TQSGDIIVIDLGSK	(L)		17.81	723.36	1445.79	-0.0719	-49.7	P02843	Vitellogenin-1
315	17K03_COLLAB-IT_CTRL_011.3589.3589.0	3	13.3	81.4	6580000	-1	1	0	0	0		76	(K)	HDLTPSFVPSPSNVPVWIIK	(S)		22.53	745.24	2233.2	0.5039	225.6	P06607	Vitellogenin-3
317	17K03_COLLAB-IT_CTRL_033.3098.3098.0	2	13.26	89.5	9220000	-1	1	0	0	0		191	(K)	SVVSYQCSTLPIFSGSTVEK	(S)	C:Carbamidomethylation,	19.1	1095.95	2189.08	1.8133	827.6	O01666	ATP synthase subunit gamma, mitochondrial
318	17K03_COLLAB-IT_CTRL_033.3418.3418.2	2	13.12	79.7	7410000	-1	0	0	0	0		3174	(K)	AFQLALDYPFR	(A)		21.16	670.87	1340.7	0.033	24.6	Q9V496	Apolipophorins
319	17K03_COLLAB-IT_CTRL_031.2721.2721.2	2	13.12	88.3	14100000	-1	1	0	0	0		12	(K)	TITLEVEPSDTIENVK	(A)		16.81	894.92	1787.93	0.9054	506.2	P18101	Ubiquitin-60S ribosomal protein L40
320	17K03_COLLAB-IT_CTRL_023.2692.2702.2	2	13.11	78.2	17100000	-1	0	0	0	0		856	(R)	TFVTTSTVPGSQVYIQETTR	(T)		16.55	1108.46	2215.12	0.7886	355.9	P35415	Paramyosin, long form
321	17K03_COLLAB-IT_CTRL_032.3302.3302.0	2	13.11	75.2	7570000	-1	1	0	0	0		213	(K)	GSVGFGSGLHGWAFTLK	(Q)		20.45	862.03	1720.88	2.1722	1260.6	P13060	Elongation factor 2
322	17K03_COLLAB-IT_CTRL_031.2602.2602.0	2	13.1	79.3	8240000	-1	0	0	0	0		342	(K)	YVAGSAGAGSGSLFVANHAY	(-)		16.06	950.4	1898.9	0.8896	468.2	P07764	Fructose-bisphosphate aldolase
323	17K03_COLLAB-IT_CTRL_032.3232.3232.0	5	13.09	77.1	37000000	-1	2	0	0	0		66	(R)	GAELLQQVYHLSQIHHNVEPNYVPSGIQVYVPKPNGDK	(T)		20.01	854.69	4268.19	1.2322	288.6	P02843	Vitellogenin-1
325	17K03_COLLAB-IT_CTRL_011.2561.2561.2	2	13.07	80.6	7900000	-1	0	0	0	0		47	(R)	SAEISNILEER	(I)		15.89	630.76	1260.64	-0.1303	-103.4	P35381	ATP synthase subunit alpha, mitochondrial
327	17K03_COLLAB-IT_CTRL_013.3746.3746.0	3	13.02	70.7	21000000	-1	1	0	0	0		233	(K)	GVPQEIIHLIGQGISAHVAGAAGNK	(Y)		23.44	813.13	2437.33	0.0444	18.2	P06607	Vitellogenin-3
328	17K03_COLLAB-IT_CTRL_031.2218.2224.0	2	13.01	78	15900000	-1	0	0	0	0		39	(K)	TFTAWCNSHLR	(K)	C:Carbamidomethylation,	13.74	696.77	1392.65	-0.115	-82.6	P18091	Alpha-actinin, sarcomeric
329	17K03_COLLAB-IT_CTRL_032.3825.3825.0	3	13.01	82.1	4660000	-1	2	0	0	0		194	(K)	YFSQALDKPPNPFLAILGGAK	(V)		23.78	750.53	2247.22	2.3582	1048.3	Q01604	Phosphoglycerate kinase
331	17K03_COLLAB-IT_CTRL_033.3022.3022.0	2	12.97	73.3	6580000	-1	1	0	0	0		50	(K)	FVQVEIDLVTAK	(E)		18.57	682.28	1361.77	1.7852	1309.2	P09491	Tropomyosin-2
332	17K03_COLLAB-IT_CTRL_023.3030.3030.2	2	12.95	75.9	16400000	-1	0	0	0	0		8	(K)	TVEQSLNFFGTDPER	(G)		18.6	870.39	1739.82	-0.0508	-29.2	P22700	Calcium-transporting ATPase sarcoplasmic/endoplasmic reticulum type
334	17K03_COLLAB-IT_CTRL_021.1783.1783.0	3	12.94	70.2	5470000	-1	0	0	0	0		113	(R)	GLAFCHSHNVLHR	(D)	C:Carbamidomethylation,	11.02	516.86	1547.77	0.8006	517	P48609	Cyclin-dependent kinase 5 homolog
335	17K03_COLLAB-IT_CTRL_031.2904.2904.0	3	12.94	87.2	10600000	-1	0	0	0	0		294	(K)	TFIVQGFGNVGLHTTR	(Y)		17.97	582.92	1746.93	-0.1831	-104.8	P54385	Glutamate dehydrogenase, mitochondrial
336	17K03_COLLAB-IT_CTRL_013.3388.3388.2	2	12.92	78.3	6900000	-1	1	0	0	0		103	(K)	GMALNLEPDNVGVVVFGNDK	(L)		21.18	1044.95	2088.04	0.8497	406.8	P35381	ATP synthase subunit alpha, mitochondrial
337	17K03_COLLAB-IT_CTRL_023.3146.3146.2	2	12.91	90.6	14000000	-1	1	0	0	0		135	(R)	EHALLAFTLGVK	(Q)		19.31	649.87	1298.75	-0.014	-10.8	P08736	Elongation factor 1-alpha 1
338	17K03_COLLAB-IT_CTRL_031.2333.2333.0	2	12.87	83.4	18800000	-1	0	0	0	0		87	(R)	TIAMDGTEGLVR	(G)		14.45	632.27	1262.64	0.8918	705.8	Q05825	ATP synthase subunit beta, mitochondrial
339	17K03_COLLAB-IT_CTRL_021.3812.3812.0	3	12.86	73	11700000	-1	2	0	0	0		80	(R)	TGKPLSVELGPGIMGSIFDGIQRPLK	(D)		23.36	904.9	2710.5	2.1894	807.1	Q27331	V-type proton ATPase catalytic subunit A isoform 2
341	17K03_COLLAB-IT_CTRL_021.2887.2887.0	4	12.85	76.2	20100000	-1	1	0	0	0		109	(R)	APARPGAIAPLHVIIPAQNTGLGPEK	(T)		17.56	648.36	2588.47	1.9511	753.2	P19889	60S acidic ribosomal protein P0
343	17K03_COLLAB-IT_CTRL_013.2889.2907.2	2	12.82	83.7	8590000	-1	0	0	0	0		255	(K)	SHLLFFVSR	(E)		17.99	553.91	1105.62	1.1974	1081.9	P54399	Protein disulfide-isomerase
347	17K03_COLLAB-IT_CTRL_031.4022.4022.0	4	12.82	85.7	3910000	-1	0	0	0	0		47	(K)	ENVVGEGTHFFIPWVQRPIIFDIR	(S)		25.05	718.56	2869.51	1.7034	593.3	P24156	Protein l(2)37Cc
348	17K03_COLLAB-IT_CTRL_012.2155.2155.0	3	12.79	86.3	15900000	-1	0	0	0	0		86	(K)	VWHHTFYNELR	(V)		13.25	501.32	1501.73	0.2119	141.1	P02574	Actin, larval muscle
349	17K03_COLLAB-IT_CTRL_031.2854.2854.0	4	12.79	74	18500000	-1	2	0	0	0		400	(R)	HLQIIYHINFLHMENVKK	(K)		17.67	570.29	2277.23	0.9057	397.6	Q9XTL9	Glycogen phosphorylase
350	17K03_COLLAB-IT_CTRL_012.3776.3776.0	5	12.78	78.5	8750000	-1	1	0	0	0		146	(R)	AALPQHVVTMLNNMPTTLHPMSQFAAAVTALNHDSK	(F)		23.64	772.36	3856.93	0.8414	218.1	Q9W401	Probable citrate synthase, mitochondrial
356	17K03_COLLAB-IT_CTRL_033.2852.2852.0	3	12.68	82.1	8410000	-1	0	0	0	0		109	(R)	GAIHTAPLAGHIQSVASINAAPAPGTL	(-)		17.51	846.35	2535.37	1.6677	657.3	Q26416	Adult cuticle protein 1
357	17K03_COLLAB-IT_CTRL_032.2654.2671.0	2	12.63	78.6	23000000	-1	0	0	0	0		856	(R)	TFVTTSTVPGSQVYIQETTR	(T)		16.32	1107.97	2215.12	-0.1914	-86.4	P35415	Paramyosin, long form
358	17K03_COLLAB-IT_CTRL_033.3751.3751.0	3	12.63	94.3	5950000	-1	1	0	0	0		227	(K)	TLIDALDAILPPARPTDK	(A)		23.27	641.17	1920.08	1.4154	736.6	P08736	Elongation factor 1-alpha 1
360	17K03_COLLAB-IT_CTRL_032.3178.3178.0	3	12.61	79.7	24600000	-1	1	0	0	0		767	(K)	SYSNYGHFDYTFFNDYYTK	(Y)		19.63	811.66	2432.01	0.9512	391	P11996	Larval serum protein 1 beta chain
361	17K03_COLLAB-IT_CTRL_023.3465.3465.2	2	12.6	85.3	10700000	-1	0	0	0	0		3174	(K)	AFQLALDYPFR	(A)		21.35	671.34	1340.7	0.973	725.2	Q9V496	Apolipophorins
362	17K03_COLLAB-IT_CTRL_023.2973.2973.2	2	12.59	72	11800000	-1	0	0	0	0		294	(K)	TFIVQGFGNVGLHTTR	(Y)		18.25	874.45	1746.93	0.9641	551.6	P54385	Glutamate dehydrogenase, mitochondrial
363	17K03_COLLAB-IT_CTRL_033.2713.2720.2	2	12.56	83.4	23800000	-1	1	0	0	0		2323	(K)	HIIYIVGDFSK	(Q)		16.69	646.26	1291.7	-0.1918	-148.5	Q9V496	Apolipophorins
365	17K03_COLLAB-IT_CTRL_013.3752.3752.0	4	12.46	81.7	5880000	-1	2	0	0	0		623	(K)	VSPAHPDPPTTAAVAAPPATESPKK	(S)		23.48	610.44	2437.27	1.466	601.1	Q6AWG9	Uncharacterized protein CG5098
366	17K03_COLLAB-IT_CTRL_033.3889.3889.0	3	12.43	85.5	5210000	-1	0	0	0	0		95	(K)	GILMLMQPCDHIIEIAFPLRR	(D)	C:Carbamidomethylation,	24.15	842.35	2523.34	1.6958	671.6	P54385	Glutamate dehydrogenase, mitochondrial
367	17K03_COLLAB-IT_CTRL_032.3834.3848.0	4	12.38	63.9	20200000	-1	3	0	0	0		825	(R)	TWPWYKLWQKVKPLLNVSR	(I)		23.84	611.56	2442.38	0.8373	342.7	P05661	Myosin heavy chain, muscle
369	17K03_COLLAB-IT_CTRL_033.2107.2112.0	2	12.34	82.2	14100000	-1	0	0	0	0		281	(K)	RPQILGGLSR	(G)		12.83	548.84	1096.66	0.0142	12.9	P06607	Vitellogenin-3
371	17K03_COLLAB-IT_CTRL_033.3337.3337.2	2	12.33	82.1	8760000	-1	1	0	0	0		89	(K)	LFLMSWCPDTAK	(V)	C:Carbamidomethylation,	20.65	734.85	1468.7	-0.0036	-2.4	P45594	Cofilin/actin-depolymerizing factor homolog
374	17K03_COLLAB-IT_CTRL_032.1949.1949.0	3	12.26	86.2	3710000	-1	1	0	0	0		835	(K)	VKPLLNVSR	(I)		11.93	343.09	1025.65	1.6089	1566.2	P05661	Myosin heavy chain, muscle
375	17K03_COLLAB-IT_CTRL_031.2250.2253.0	2	12.25	88	7680000	-1	0	0	0	0		301	(R)	TYYGVPQWHR	(E)		13.93	653.76	1306.63	-0.12	-91.9	Q24388	Larval serum protein 2
376	17K03_COLLAB-IT_CTRL_022.4071.4071.0	4	12.24	74.4	7510000	-1	0	0	0	0		47	(K)	ENVVGEGTHFFIPWVQRPIIFDIR	(S)		25.09	718.36	2869.51	0.9034	314.7	P24156	Protein l(2)37Cc
378	17K03_COLLAB-IT_CTRL_011.3872.3872.0	3	12.22	88	5690000	-1	0	0	0	0		95	(K)	GILMLMQPCDHIIEIAFPLRR	(D)	C:Carbamidomethylation,	24.31	842.42	2523.34	1.9058	754.7	P54385	Glutamate dehydrogenase, mitochondrial
379	17K03_COLLAB-IT_CTRL_023.3931.3931.0	3	12.21	71.8	7650000	-1	0	0	0	0		217	(K)	LTTPTYGDLNHLVSLTMSGVTTCLR	(F)	C:Carbamidomethylation,	24.31	918.14	2750.39	2.0203	734	Q24560	Tubulin beta-1 chain
382	17K03_COLLAB-IT_CTRL_011.2396.2400.0	2	12.12	80.7	16300000	-1	0	0	0	0		30	(R)	AVFPSIVGRPR	(H)		14.85	599.84	1198.71	-0.0328	-27.3	P10987	Actin-5C
384	17K03_COLLAB-IT_CTRL_023.3472.3472.0	3	12.1	79.2	9650000	-1	1	0	0	0		440	(R)	FLSQPFQVAEVFTGHAGK	(L)		21.4	655.02	1963.01	0.0382	19.5	Q05825	ATP synthase subunit beta, mitochondrial
385	17K03_COLLAB-IT_CTRL_031.3079.3079.0	3	12.1	100	13100000	-1	0	0	0	0		86	(K)	TVDVLINGAGILDDHQIER	(T)		19.08	693.63	2078.09	0.7878	378.9	P00334	Alcohol dehydrogenase
386	17K03_COLLAB-IT_CTRL_012.2092.2092.0	3	12.09	82.8	4170000	-1	0	0	0	0		339	(K)	SGQVVPGYGHAVLR	(K)		12.85	480.94	1439.78	1.0301	714.9	Q9W401	Probable citrate synthase, mitochondrial
387	17K03_COLLAB-IT_CTRL_013.2636.2643.0	2	12.09	76.7	9830000	-1	0	0	0	0		856	(R)	TFVTTSTVPGSQVYIQETTR	(T)		16.38	1108.02	2215.12	-0.0914	-41.3	P35415	Paramyosin, long form
389	17K03_COLLAB-IT_CTRL_033.3826.3826.0	3	12.08	83.5	3440000	-1	0	0	0	0		152	(R)	HLQYLLAFSYWPQIASR	(T)		23.74	698.79	2093.1	1.2587	601	Q9VXK0	Protein NipSnap
390	17K03_COLLAB-IT_CTRL_022.2418.2418.0	2	12.04	71.9	17000000	-1	0	0	0	0		30	(R)	AVFPSIVGRPR	(H)		14.87	599.85	1198.71	-0.0128	-10.7	P10987	Actin-5C
391	17K03_COLLAB-IT_CTRL_033.2160.2160.0	4	12.04	76.8	3020000	-1	1	0	0	0		304	(R)	TSNSTHKSIEELR	(S)		13.16	376.24	1501.76	0.1777	118.3	P08928	Lamin Dm0
392	17K03_COLLAB-IT_CTRL_021.2560.2560.2	2	12.01	84.3	8340000	-1	0	0	0	0		47	(R)	SAEISNILEER	(I)		15.75	630.84	1260.64	0.0297	23.6	P35381	ATP synthase subunit alpha, mitochondrial
395	17K03_COLLAB-IT_CTRL_031.2178.2178.0	2	11.95	77.6	6520000	-1	1	0	0	0		351	(R)	ITAAVMHMGGMK	(F)		13.46	624.14	1246.61	0.6622	531	P05661	Myosin heavy chain, muscle
403	17K03_COLLAB-IT_CTRL_033.2422.2425.0	2	11.83	75.7	9000000	-1	0	0	0	0		30	(R)	AVFPSIVGRPR	(H)		14.82	599.83	1198.71	-0.0528	-44	P10987	Actin-5C
404	17K03_COLLAB-IT_CTRL_032.3689.3689.2	2	11.8	84.6	4570000	-1	0	0	0	0		552	(K)	FVWDMSLFAR	(Q)		22.93	636.35	1271.62	0.0686	53.9	P11996	Larval serum protein 1 beta chain
408	17K03_COLLAB-IT_CTRL_011.2546.2546.2	2	11.71	85.6	13700000	-1	1	0	0	0		364	(R)	SFPAVPANSLQQYK	(Q)		15.8	775.4	1549.8	-0.0082	-5.3	P02843	Vitellogenin-1
412	17K03_COLLAB-IT_CTRL_022.1951.1951.0	3	11.68	86.3	3620000	-1	0	0	0	0		12	(R)	TYSSRPVTTSYAVTTPR	(L)		11.95	629.65	1886.96	-0.0252	-13.4	C0HK95	Protein anoxia up-regulated
415	17K03_COLLAB-IT_CTRL_031.2941.2941.0	2	11.67	81.6	11000000	-1	0	0	0	0		124	(K)	SLLPYDQMTMEDYR	(D)		18.2	881.92	1761.78	1.0505	595.9	Q24251	ATP synthase subunit d, mitochondrial
416	17K03_COLLAB-IT_CTRL_023.2588.2588.0	2	11.65	83	13100000	-1	1	0	0	0		364	(R)	SFPAVPANSLQQYK	(Q)		15.93	775.95	1549.8	1.0918	704	P02843	Vitellogenin-1
417	17K03_COLLAB-IT_CTRL_031.4145.4145.2	2	11.64	81.3	4250000	-1	1	0	0	0		190	(K)	AASGDLIIIDLGSTLTNFK	(R)		25.82	975.34	1949.06	0.6137	314.8	P06607	Vitellogenin-3
418	17K03_COLLAB-IT_CTRL_032.2702.2702.0	3	11.62	75	13800000	-1	1	0	0	0		1195	(K)	HNDAVAEMAEQVDQLNK	(L)		16.6	638.07	1911.89	0.3089	161.6	P05661	Myosin heavy chain, muscle
419	17K03_COLLAB-IT_CTRL_021.2791.2799.0	4	11.6	66.6	544000000	-1	3	0	0	0		388	(K)	EGEAADGEAKKEGAGDGEGAEGDEAEGEEAK	(E)		17.02	749.09	2992.24	1.0972	366.5	P41073	Zinc finger protein on ecdysone puffs
420	17K03_COLLAB-IT_CTRL_021.3614.3614.0	3	11.6	77.5	22600000	-1	1	0	0	0		76	(K)	HDLTPSFVPSPSNVPVWIIK	(S)		22.11	745.35	2233.2	0.8339	373.3	P06607	Vitellogenin-3
423	17K03_COLLAB-IT_CTRL_032.2363.2363.0	4	11.55	75.4	6780000	-1	1	0	0	0		131	(R)	ANGQSKGFSVISLGSESSLR	(A)		14.54	506.62	2024.04	-0.5825	-287.9	Q9VSH4	Cleavage and polyadenylation specificity factor subunit CG7185
424	17K03_COLLAB-IT_CTRL_012.3758.3758.0	5	11.54	81	2830000	-1	1	0	0	0		809	(K)	YEAKEFLTPLGNGSSAHPSPSPGQQLIEAVIR	(A)		23.53	679.1	3393.74	-2.2729	-670.2	Q9NGC3	Centaurin-gamma-1A
425	17K03_COLLAB-IT_CTRL_023.3288.3288.0	3	11.54	71.8	13200000	-1	2	0	0	0		211	(K)	SKGSLEDQVVQTNPVLEAFGNAK	(T)		20.24	811.33	2431.25	0.7291	299.8	P05661	Myosin heavy chain, muscle
426	17K03_COLLAB-IT_CTRL_013.3161.3161.2	2	11.52	81.5	4240000	-1	0	0	0	0		364	(K)	GIAEYLCGLYSR	(K)	C:Carbamidomethylation,	19.71	701.9	1401.68	1.1096	791	Q24325	Transcription initiation factor TFIID subunit 2
427	17K03_COLLAB-IT_CTRL_021.4159.4167.2	2	11.51	89	10600000	-1	0	0	0	0		95	(R)	LVSAGIPVSVPLPLILAAR	(N)		25.55	943.61	1886.18	0.029	15.4	Q9VV36	Retinin
428	17K03_COLLAB-IT_CTRL_013.4800.4800.0	3	11.5	100	6190000	-1	1	0	0	0		328	(R)	TWLPAGEALLQMIAIHLPSPVVAQK	(Y)		30.08	895.62	2683.5	1.3451	501	P13060	Elongation factor 2
429	17K03_COLLAB-IT_CTRL_023.2566.2566.0	5	11.5	82.2	12300000	-1	1	0	0	0		370	(R)	LLKYVNSLLDLHPPTFFNAMTVHPYPR	(Y)		15.8	637.64	3183.68	0.4897	153.8	Q9VH20	TATA box-binding protein-associated factor RNA polymerase I subunit B
431	17K03_COLLAB-IT_CTRL_011.2553.2553.0	3	11.48	71.2	11800000	-1	2	0	0	0		89	(K)	HWPFEVVSADGKPK	(I)		15.84	533.2	1596.82	0.7685	481.1	P11147	Heat shock 70 kDa protein cognate 4
438	17K03_COLLAB-IT_CTRL_011.1335.1348.2	2	11.39	80.9	5570000	-1	0	0	0	0		931	(R)	GGAGNQGGGGGGYINR	(Q)		8.19	696.28	1391.64	-0.0883	-63.5	Q9I7D3	Caprin homolog
440	17K03_COLLAB-IT_CTRL_022.3080.3080.0	3	11.33	73.3	14000000	-1	1	0	0	0		210	(R)	ITAAGINARVEQLVK	(G)		18.8	528.64	1582.93	0.9779	617.4	P29349	Tyrosine-protein phosphatase corkscrew
442	17K03_COLLAB-IT_CTRL_031.3130.3130.2	2	11.3	73.3	5040000	-1	0	0	0	0		178	(K)	ISPALQLQLLR	(Y)		19.4	626.22	1251.78	-0.3456	-276.2	Q9V3R1	Accessory gland protein Acp36DE
443	17K03_COLLAB-IT_CTRL_023.1340.1358.2	2	11.28	78.4	8220000	-1	0	0	0	0		931	(R)	GGAGNQGGGGGGYINR	(Q)		8.14	696.32	1391.64	-0.0083	-6	Q9I7D3	Caprin homolog
447	17K03_COLLAB-IT_CTRL_033.1801.1801.0	4	11.21	71.7	4860000	-1	0	0	0	0		77	(R)	MNFSHGSHEYHAATVANVR	(Q)		10.9	533.09	2127.98	1.3604	638.9	O62619	Pyruvate kinase
451	17K03_COLLAB-IT_CTRL_031.3035.3035.0	4	11.11	77.1	36700000	-1	1	0	0	0		800	(R)	DLGYNGKLVFAISDGDYDSVFRIDPDR	(G)		18.8	763.12	3047.47	1.9837	650.5	Q9VW71	Fat-like cadherin-related tumor suppressor homolog
455	17K03_COLLAB-IT_CTRL_011.3413.3413.2	2	11.09	74.9	6080000	-1	0	0	0	0		3174	(K)	AFQLALDYPFR	(A)		21.4	670.94	1340.7	0.173	129	Q9V496	Apolipophorins
456	17K03_COLLAB-IT_CTRL_011.4247.4247.0	3	11.08	89.5	2970000	-1	1	0	0	0		297	(K)	LRPNLGTLNAVLQCISTFGNFK	(V)	C:Carbamidomethylation,	26.67	822.01	2463.32	0.6978	283.2	A1Z9A8	Protein PTCD3 homolog, mitochondrial
461	17K03_COLLAB-IT_CTRL_021.1918.1928.0	3	11.06	84.5	7920000	-1	1	0	0	0		835	(K)	VKPLLNVSR	(I)		11.86	342.58	1025.65	0.0789	76.9	P05661	Myosin heavy chain, muscle
462	17K03_COLLAB-IT_CTRL_031.2571.2571.0	2	11.06	90.4	8700000	-1	0	0	0	0		47	(R)	SAEISNILEER	(I)		15.87	630.59	1260.64	-0.4703	-373.2	P35381	ATP synthase subunit alpha, mitochondrial
463	17K03_COLLAB-IT_CTRL_012.3030.3030.0	3	11	100	5820000	-1	0	0	0	0		483	(R)	HYYSFIPFSAGPR	(S)		18.78	514.87	1541.75	0.8419	545.8	Q9V3S0	Cytochrome P450 4g1
464	17K03_COLLAB-IT_CTRL_022.3195.3195.0	2	11	95.3	23300000	-1	1	0	0	0		122	(K)	LLTIAFNTLK	(K)		19.53	567.88	1133.69	1.0599	934	P55841	60S ribosomal protein L14
465	17K03_COLLAB-IT_CTRL_033.3439.3446.2	2	11	69.1	19500000	-1	0	0	0	0		417	(K)	EMNYYTVLFGVSR	(A)		21.3	789.91	1578.76	0.0506	32.1	Q9W401	Probable citrate synthase, mitochondrial
466	17K03_COLLAB-IT_CTRL_032.4115.4121.2	2	10.98	87.4	7990000	-1	0	0	0	0		95	(R)	LVSAGIPVSVPLPLILAAR	(N)		25.61	943.56	1886.18	-0.071	-37.6	Q9VV36	Retinin
467	17K03_COLLAB-IT_CTRL_022.3086.3107.0	4	10.97	76.7	51100000	-1	1	0	0	0		800	(R)	DLGYNGKLVFAISDGDYDSVFRIDPDR	(G)		18.84	763.07	3047.47	1.7837	585	Q9VW71	Fat-like cadherin-related tumor suppressor homolog
468	17K03_COLLAB-IT_CTRL_032.2686.2686.0	5	10.97	73.5	8820000	-1	1	0	0	0		511	(K)	ESPFLVPYVIPQQQGQTPEQYLKTIGYR	(L)		16.51	656.96	3279.7	1.0661	324.9	Q9V4W1	Nucleoporin GLE1
469	17K03_COLLAB-IT_CTRL_023.4023.4023.0	2	10.95	83.2	5990000	-1	0	0	0	0		57	(R)	FFDMVEYFFHR	(G)		24.88	769.87	1537.69	1.0394	675.5	P54385	Glutamate dehydrogenase, mitochondrial
470	17K03_COLLAB-IT_CTRL_032.3348.3348.0	5	10.94	76	7450000	-1	3	0	0	0		4	(K)	KLNTSVGGTPTNTLLNYFSKSPAFDK	(K)		20.77	561.21	2800.45	1.5693	560.1	Q9VUM0	Probable DNA mismatch repair protein Msh6
479	17K03_COLLAB-IT_CTRL_023.3070.3070.2	2	10.86	85.9	12300000	-1	0	0	0	0		483	(R)	HYYSFIPFSAGPR	(S)		18.85	771.31	1541.75	-0.1409	-91.4	Q9V3S0	Cytochrome P450 4g1
484	17K03_COLLAB-IT_CTRL_023.3414.3414.0	4	10.85	65.5	8770000	-1	1	0	0	0		970	(R)	GLSVSEKFHLSRPFNFAVYLTTER	(K)		21.03	700.93	2798.46	2.2357	798.3	Q9V496	Apolipophorins
485	17K03_COLLAB-IT_CTRL_033.2281.2281.2	2	10.85	75.3	8970000	-1	1	0	0	0		8	(R)	TFIMVKPDGVQR	(G)		13.97	696.05	1390.75	0.3416	245.6	P08879	Nucleoside diphosphate kinase
490	17K03_COLLAB-IT_CTRL_021.2490.2490.0	5	10.81	72.5	28400000	-1	0	0	0	0		661	(R)	NHDVILQLLEQTTGNILVVAHATTLDTCSR	(Q)	C:Carbamidomethylation,	15.36	666.96	3332.73	-1.9558	-587.2	Q9VCE9	Protein UBASH3A homolog
491	17K03_COLLAB-IT_CTRL_031.1719.1732.2	2	10.81	84.3	3650000	-1	0	0	0	0		1689	(R)	TLLEQADR	(G)		10.54	473.22	945.5	-0.0673	-71.1	P05661	Myosin heavy chain, muscle
494	17K03_COLLAB-IT_CTRL_032.3152.3152.0	5	10.79	70.8	25900000	-1	0	0	0	0		630	(R)	RNAGVVAHDGLLYVVGGDDGTSNLASVEVYCPDSDSWR	(I)	C:Carbamidomethylation,	19.46	810.53	4050.89	-2.2678	-560.1	Q04652	Ring canal kelch protein
496	17K03_COLLAB-IT_CTRL_023.3170.3180.2	2	10.77	80.1	19000000	-1	0	0	0	0		133	(R)	TGAIVDVPVGDELLGR	(V)		19.46	805.93	1610.88	-0.0221	-13.7	P35381	ATP synthase subunit alpha, mitochondrial
502	17K03_COLLAB-IT_CTRL_021.1845.1845.0	3	10.73	79.7	6070000	-1	1	0	0	0		118	(R)	HLYHDLYMK	(C)		11.41	407.42	1219.59	0.6526	534.8	P36241	60S ribosomal protein L19
503	17K03_COLLAB-IT_CTRL_033.3100.3100.0	3	10.73	90.1	5720000	-1	2	0	0	0		37	(K)	SCWIPDEKEGYLLGEIK	(A)	C:Carbamidomethylation,	19.11	680.12	2037	1.3457	660.2	P05661	Myosin heavy chain, muscle
504	17K03_COLLAB-IT_CTRL_011.1738.1747.0	4	10.7	82	7310000	-1	0	0	0	0		213	(K)	LPYHMRLEHALMSFAIRR	(S)		10.7	561.24	2241.19	0.7486	333.9	Q01083	Protein spitz
508	17K03_COLLAB-IT_CTRL_033.2727.2727.0	3	10.67	72.1	7260000	-1	2	0	0	0		105	(K)	HFCPNVPIILVGNKK	(D)	C:Carbamidomethylation,	16.77	579.94	1735.97	1.8378	1057.6	P48148	Ras-like GTP-binding protein Rho1
510	17K03_COLLAB-IT_CTRL_031.3969.3969.0	3	10.65	87.4	9060000	-1	2	0	0	0		251	(R)	TIITYPWFQNSSVILFLNKK	(D)		24.71	804.78	2412.33	-0.0071	-3	P23625	G protein alpha q subunit
511	17K03_COLLAB-IT_CTRL_032.2682.2682.0	5	10.63	68.6	24500000	-1	1	0	0	0		168	(K)	ANEVLATQYGSLAVNGVDTTTALAERLLEYYFPK	(C)		16.48	744.78	3717.9	1.9699	529.6	Q9VXY7	Lipid storage droplets surface-binding protein 2
515	17K03_COLLAB-IT_CTRL_032.3136.3136.0	3	10.59	75.2	26400000	-1	1	0	0	0		155	(K)	HTGSGILSMANAGANTNGSQFFICTVK	(T)	C:Carbamidomethylation,	19.36	928.74	2783.32	0.8815	316.6	P25007	Peptidyl-prolyl cis-trans isomerase
516	17K03_COLLAB-IT_CTRL_013.2839.2839.0	4	10.58	76.4	14400000	-1	2	0	0	0		400	(R)	HLQIIYHINFLHMENVKK	(K)		17.68	570.41	2277.23	1.3857	608.1	Q9XTL9	Glycogen phosphorylase
517	17K03_COLLAB-IT_CTRL_011.2848.2860.0	5	10.58	71.9	22600000	-1	0	0	0	0		5	(K)	RRPLRPNLGGTAGSPSSSGSNMNFRPGGPDITRSEAR	(G)		17.72	771.86	3852.94	2.3326	605	Q9VRJ2	FIT family protein CG10671
518	17K03_COLLAB-IT_CTRL_022.2925.2934.0	5	10.58	72.8	39900000	-1	0	0	0	0		5	(K)	RRPLRPNLGGTAGSPSSSGSNMNFRPGGPDITRSEAR	(G)		17.88	771.87	3852.94	2.3826	618	Q9VRJ2	FIT family protein CG10671
520	17K03_COLLAB-IT_CTRL_031.2822.2822.0	4	10.52	76.5	7770000	-1	1	0	0	0		532	(K)	SCSNVDGDATATAATALSSTVGGGIGGIGGSIK	(M)	C:Carbamidomethylation,	17.48	739.09	2952.42	0.9167	310.4	Q9I7S6	High affinity cGMP-specific 3',5'-cyclic phosphodiesterase 9A
521	17K03_COLLAB-IT_CTRL_012.2847.2847.2	2	10.51	74.5	5390000	-1	0	0	0	0		210	(K)	LPVVAATIYCNTYR	(G)	C:Carbamidomethylation,	17.63	820.77	1640.85	-0.3138	-191.3	Q9W401	Probable citrate synthase, mitochondrial
526	17K03_COLLAB-IT_CTRL_013.3585.3585.0	3	10.47	72.4	14400000	-1	2	0	0	0		128	(R)	KGGPGGIICNIGSVTGFNAIYQVPVYSGTK	(A)	C:Carbamidomethylation,	22.43	1019.63	3054.57	2.3037	753.6	P00334	Alcohol dehydrogenase
530	17K03_COLLAB-IT_CTRL_023.1988.1994.0	4	10.45	71.4	9210000	-1	1	0	0	0		421	(K)	ENPATNWRSK	(D)		12.16	300.95	1202.59	-1.8131	-1509.9	Q9XZU1	Exportin-2
531	17K03_COLLAB-IT_CTRL_011.3127.3127.2	2	10.44	87.4	4650000	-1	1	0	0	0		99	(K)	LYTYVTYVPVSTFK	(N)		19.51	840.92	1680.89	-0.0556	-33.1	Q9V597	60S ribosomal protein L31
534	17K03_COLLAB-IT_CTRL_032.1354.1354.0	2	10.41	82.8	2700000	-1	0	0	0	0		931	(R)	GGAGNQGGGGGGYINR	(Q)		8.2	696.3	1391.64	-0.0483	-34.7	Q9I7D3	Caprin homolog
540	17K03_COLLAB-IT_CTRL_023.3306.3371.0	4	10.39	77.6	18400000	-1	2	0	0	0		447	(R)	KSCAAVQDQLAELKR	(L)	C:Carbamidomethylation,	20.35	429.98	1716.91	-0.008	-4.6	Q9W2P0	Augmin complex subunit dgt3
542	17K03_COLLAB-IT_CTRL_011.1978.2015.0	4	10.38	73.1	14100000	-1	1	0	0	0		421	(K)	ENPATNWRSK	(D)		12.2	301.09	1202.59	-1.2531	-1043.1	Q9XZU1	Exportin-2
546	17K03_COLLAB-IT_CTRL_031.1747.1747.0	3	10.37	76.6	3270000	-1	1	0	0	0		2099	(K)	HFHPECFTCGQCGK	(I)	C:Carbamidomethylation,	10.72	589.23	1764.7	0.9715	550.2	A1ZA47	PDZ and LIM domain protein Zasp
551	17K03_COLLAB-IT_CTRL_012.2932.2939.2	2	10.34	85.9	4070000	-1	1	0	0	0		20	(K)	GYNFGLWK	(L)		18.16	492.81	984.494	0.1189	120.8	Q94920	Voltage-dependent anion-selective channel
554	17K03_COLLAB-IT_CTRL_012.2158.2163.0	4	10.33	74.9	53200000	-1	0	0	0	0		282	(K)	AAESQAGSAGSSGSCSNPAAVHR	(Q)	C:Carbamidomethylation,	13.28	540.58	2158.95	0.3451	159.8	B7YZV4	Calcium/calmodulin-dependent 3',5'-cyclic nucleotide phosphodiesterase 1
556	17K03_COLLAB-IT_CTRL_031.3224.3224.0	3	10.32	68.7	15300000	-1	2	0	0	0		211	(K)	SKGSLEDQVVQTNPVLEAFGNAK	(T)		20.02	811.76	2431.25	2.0191	829.8	P05661	Myosin heavy chain, muscle
557	17K03_COLLAB-IT_CTRL_011.2590.2609.0	5	10.3	72.5	21600000	-1	3	0	0	0		382	(K)	EQWYLNGGAKDGLDMNVGPAWQKGYTGK	(G)		16.07	617.94	3083.47	2.2029	713.9	P30432	Furin-like protease 2
560	17K03_COLLAB-IT_CTRL_021.6553.6625.0	3	10.28	84.2	16000000	-1	0	0	0	0		595	(R)	QRDTGTSGR	(S)		40.6	326.98	977.476	1.4496	1480.8	Q9V461	DNA replication licensing factor Mcm6
567	17K03_COLLAB-IT_CTRL_022.2344.2344.0	2	10.22	75.9	31100000	-1	0	0	0	0		87	(R)	TIAMDGTEGLVR	(G)		14.44	632.27	1262.64	0.8918	705.8	Q05825	ATP synthase subunit beta, mitochondrial
569	17K03_COLLAB-IT_CTRL_021.3082.3090.0	5	10.21	80.7	56300000	-1	2	0	0	0		437	(K)	GEISPFAYTPFSAGPRNCIGQKFAMLEMK	(S)	C:Carbamidomethylation,	18.74	650.42	3247.57	0.4972	153.1	O46051	Probable cytochrome P450 4d14
572	17K03_COLLAB-IT_CTRL_011.2906.2906.0	2	10.2	85.1	5830000	-1	0	0	0	0		294	(K)	TFIVQGFGNVGLHTTR	(Y)		18.08	874.14	1746.93	0.3441	197	P54385	Glutamate dehydrogenase, mitochondrial
573	17K03_COLLAB-IT_CTRL_022.3207.3207.2	2	10.2	78.5	37400000	-1	1	0	0	0		230	(K)	TYAYLTPDLWK	(E)		19.61	685.81	1370.7	-0.0864	-63	P31009	40S ribosomal protein S2
576	17K03_COLLAB-IT_CTRL_013.2990.2990.0	5	10.19	76.1	10100000	-1	3	0	0	0		12	(R)	GVKYGKDESAGCGFLVNVIK	(S)	C:Carbamidomethylation,	18.63	429.29	2141.11	1.3149	613.8	Q9VNH6	Exocyst complex component 4
577	17K03_COLLAB-IT_CTRL_023.1754.1756.0	4	10.19	80.7	4910000	-1	0	0	0	0		213	(K)	LPYHMRLEHALMSFAIRR	(S)		10.7	561.04	2241.19	-0.0514	-22.9	Q01083	Protein spitz
578	17K03_COLLAB-IT_CTRL_022.2824.2831.0	3	10.18	66.1	526000000	-1	2	0	0	0		173	(R)	SQWHVTFQAGSGTAELKGVLK	(V)		17.29	749.02	2244.18	0.8683	386.8	Q9W2N0	F-actin-capping protein subunit alpha
579	17K03_COLLAB-IT_CTRL_031.2261.2305.0	4	10.18	81.6	53500000	-1	1	0	0	0		466	(K)	APSAMKPLYHESGPGAVANSR	(Q)		14.03	535.93	2140.06	0.6378	297.9	P22814	Segmentation protein Runt
580	17K03_COLLAB-IT_CTRL_032.2141.2149.0	5	10.18	76.5	88800000	-1	1	0	0	0		2014	(K)	FLGLGLEAGHLKLASNLLGSTNDTVR	(A)		13.13	540.43	2696.47	1.6479	610.8	A0A1F4	Protein eyes shut
583	17K03_COLLAB-IT_CTRL_032.3049.3067.2	2	10.16	95.9	11400000	-1	0	0	0	0		26	(R)	YVIFYIR	(D)		18.77	487.25	973.551	-0.0578	-59.4	P45594	Cofilin/actin-depolymerizing factor homolog
584	17K03_COLLAB-IT_CTRL_021.2287.2295.0	4	10.15	80.1	73100000	-1	1	0	0	0		466	(K)	APSAMKPLYHESGPGAVANSR	(Q)		14.18	535.92	2140.06	0.5978	279.2	P22814	Segmentation protein Runt
586	17K03_COLLAB-IT_CTRL_021.4691.4691.0	2	10.15	77	5910000	-1	1	0	0	0		46	(R)	LGFLPEEWFQFFYNK	(T)		28.9	983.47	1964.96	0.9746	495.7	Q94516	ATP synthase subunit b, mitochondrial
589	17K03_COLLAB-IT_CTRL_023.2890.2890.0	5	10.14	93.6	7880000	-1	2	0	0	0		132	(R)	TIKWSTALHGQYGHPVLHKLIAHVFWTEGNIESAR	(H)		17.75	800.49	3997.1	1.3225	330.8	Q9VN19	Golgi to ER traffic protein 4 homolog
591	17K03_COLLAB-IT_CTRL_021.2119.2124.0	4	10.13	78.9	132000000	-1	1	0	0	0		1412	(K)	RKIPLAESVSDAEDSPSLSR	(T)		13.15	540.56	2157.11	2.1036	974.2	O96838	Putative 1-phosphatidylinositol 3-phosphate 5-kinase
601	17K03_COLLAB-IT_CTRL_031.2890.2916.0	5	10.06	79.5	27200000	-1	2	0	0	0		1066	(R)	AKLFNLSQTLDEIARTPVTNDDEFEAK	(L)		17.89	613.95	3065.54	0.1783	58.2	P15215	Laminin subunit gamma-1
605	17K03_COLLAB-IT_CTRL_021.3110.3110.0	4	10.03	63.4	23800000	-1	1	0	0	0		178	(K)	IFKSDGIVGLYRGFGVSVQGIIIYR	(A)		18.9	689.71	2757.55	-1.7269	-626.6	Q26365	ADP,ATP carrier protein
612	17K03_COLLAB-IT_CTRL_021.1796.1804.0	5	10	67.1	27000000	-1	1	0	0	0		697	(K)	LSGNFHANVHNDGITGEFDGQK	(F)		11.1	472.02	2357.09	-1.0196	-432.8	Q9VGI8	Bloom syndrome protein homolog
620	17K03_COLLAB-IT_CTRL_031.3410.3410.0	4	9.97	72.2	14600000	-1	1	0	0	0		457	(R)	LVFRAHLYLQSDIQNFNPSSGDLAYPEK	(L)		21.18	806.96	3222.62	2.1963	681.1	Q961G1	Conserved oligomeric Golgi complex subunit 3
622	17K03_COLLAB-IT_CTRL_011.3484.3484.0	3	9.96	72.2	7340000	-1	1	0	0	0		2028	(R)	LAIEGMVEDLITADADINAADNSGK	(T)		21.85	848.62	2546.23	-2.3836	-937	P07207	Neurogenic locus Notch protein
623	17K03_COLLAB-IT_CTRL_012.2212.2212.0	5	9.96	76.3	4440000	-1	1	0	0	0		7	(K)	QTHSATAVEFSIACRFFNNLDENLVVAGANVLKVYR	(I)	C:Carbamidomethylation,	13.63	812.07	4054.06	2.2605	557.3	Q9V726	Cleavage and polyadenylation specificity factor subunit 1
624	17K03_COLLAB-IT_CTRL_023.3268.3268.0	2	9.96	72.2	11600000	-1	1	0	0	0		387	(K)	SVLVEFYAPWCGHCK	(Q)	C:Carbamidomethylation,	20.07	926.91	1852.85	-0.0382	-20.6	P54399	Protein disulfide-isomerase
625	17K03_COLLAB-IT_CTRL_021.1573.1585.0	5	9.95	75.7	10500000	-1	1	0	0	0		4	(K)	NAVSLVTGGASGLGRATAERLAK	(Q)		9.68	441.05	2199.22	2.0005	908.8	O18404	3-hydroxyacyl-CoA dehydrogenase type-2
628	17K03_COLLAB-IT_CTRL_013.3793.3793.2	2	9.94	89.2	2530000	-1	1	0	0	0		217	(K)	LCYVALDFEQEMATAAASTSLEK	(S)	C:Carbamidomethylation,	23.74	1275.03	2548.2	0.8582	336.7	P53501	Actin-57B
631	17K03_COLLAB-IT_CTRL_022.3672.3672.2	2	9.93	72.4	8130000	-1	1	0	0	0		154	(K)	TYGFDGLDVAWQFPK	(N)		22.58	872.5	1743.84	0.155	88.9	Q23997	Chitinase-like protein CG5210
637	17K03_COLLAB-IT_CTRL_022.2995.3004.0	5	9.9	72.4	101000000	-1	0	0	0	0		508	(K)	YFSNLFTPSNRPTERVADGLGGGPMFR	(H)		18.3	597.85	2986.46	-1.2419	-416	Q9GQF1	JNK-interacting protein 3
638	17K03_COLLAB-IT_CTRL_033.3749.3749.0	5	9.89	72.1	7810000	-1	1	0	0	0		620	(K)	KGGQVFQFFYMVYPYHQPEVAQFTGYDPVVSCGVGHGSR	(Y)	C:Carbamidomethylation,	23.26	888.92	4439.08	1.4908	335.7	Q24388	Larval serum protein 2
640	17K03_COLLAB-IT_CTRL_013.3174.3174.0	2	9.87	83.5	4860000	-1	1	0	0	0		186	(R)	WFVTILNQK	(Q)		19.79	575.1	1148.65	0.5465	475.5	Q9NJH0	Elongation factor 1-gamma
646	17K03_COLLAB-IT_CTRL_032.1794.1794.2	2	9.86	86.9	2260000	-1	0	0	0	0		353	(K)	TGTLTTNQMSVSR	(M)		10.93	698.37	1395.69	0.0431	30.9	P22700	Calcium-transporting ATPase sarcoplasmic/endoplasmic reticulum type
651	17K03_COLLAB-IT_CTRL_013.1931.1931.0	3	9.83	75.6	4060000	-1	1	0	0	0		835	(K)	VKPLLNVSR	(I)		11.92	342.57	1025.65	0.0489	47.6	P05661	Myosin heavy chain, muscle
652	17K03_COLLAB-IT_CTRL_022.3374.3374.0	3	9.83	76.3	20000000	-1	1	0	0	0		2795	(K)	HIFTFDGLNFAYPGNCK	(Y)	C:Carbamidomethylation,	20.68	667.7	2000.93	0.1531	76.5	Q9V496	Apolipophorins
655	17K03_COLLAB-IT_CTRL_011.3497.3497.0	4	9.82	68.9	9990000	-1	1	0	0	0		1745	(K)	KIGFVSLSLQGGVVEFRISGPSNHVTVVR	(S)		21.93	771.21	3082.72	-0.8978	-291.3	A0A1F4	Protein eyes shut
659	17K03_COLLAB-IT_CTRL_013.3532.3532.0	3	9.8	70.1	3940000	-1	0	0	0	0		218	(R)	GGGRGDGVGGGNYLNNER	(D)		22.1	583.48	1748.81	-0.3805	-217.6	Q94535	Splicing factor U2af 38 kDa subunit
669	17K03_COLLAB-IT_CTRL_032.3099.3099.0	3	9.77	77	12200000	-1	0	0	0	0		48	(R)	VVNLTFSNIQERVMLTGR	(H)		19.14	693.66	2077.12	1.8432	886.6	Q9XZF0	Protein yippee
673	17K03_COLLAB-IT_CTRL_031.2011.2011.0	3	9.75	64.8	4590000	-1	0	0	0	0		185	(R)	YSQQAGSGLGGGPTGGALRPRR	(A)		12.39	714.27	2143.11	-2.3161	-1081.9	Q8MMC4	Protein CDV3 homolog
674	17K03_COLLAB-IT_CTRL_013.3122.3122.0	3	9.74	75.6	16200000	-1	1	0	0	0		155	(K)	HTGSGILSMANAGANTNGSQFFICTVK	(T)	C:Carbamidomethylation,	19.47	928.51	2783.32	0.1915	68.8	P25007	Peptidyl-prolyl cis-trans isomerase
675	17K03_COLLAB-IT_CTRL_022.1734.1741.2	2	9.74	61.8	13400000	-1	1	0	0	0		313	(R)	ELQLQKR	(E)		10.59	457.74	914.542	-0.0691	-75.5	Q9VKN7	Aurora kinase B
676	17K03_COLLAB-IT_CTRL_021.3507.3507.0	4	9.74	74.8	8250000	-1	2	0	0	0		139	(K)	IHRPDVFKGVGGLASDQGQEWADIRNK	(V)		21.44	749.6	2993.53	1.8441	615.7	Q9V8M2	Probable cytochrome P450 12b2, mitochondrial
680	17K03_COLLAB-IT_CTRL_012.2762.2834.0	5	9.73	76.9	26700000	-1	2	0	0	0		289	(K)	DEKLAAEEKLAAEEEEQNRPVSLLTR	(L)		17.08	594.22	2968.52	-1.4513	-489.1	P23654	Neurotactin
682	17K03_COLLAB-IT_CTRL_013.2979.2979.0	2	9.73	68.2	11300000	-1	0	0	0	0		307	(K)	LISWYDNEFGYSNR	(V)		18.56	883.37	1763.8	1.9303	1093.2	P07486	Glyceraldehyde-3-phosphate dehydrogenase 1
688	17K03_COLLAB-IT_CTRL_011.2528.2528.0	3	9.71	81.7	9800000	-1	1	0	0	0		261	(K)	AKPVVSFIAGVSAPPGRR	(M)		15.69	604.5	1809.05	2.4361	1344.8	Q94522	Succinate--CoA ligase [ADP/GDP-forming] subunit alpha, mitochondrial
689	17K03_COLLAB-IT_CTRL_013.2865.2865.0	5	9.71	62.6	11700000	-1	1	0	0	0		510	(R)	RQVSVDNVPTVSSHNLSNAGSPLPVARHK	(Q)		17.84	614.05	3066.62	-0.3983	-129.9	A1ZAU8	Patronin
702	17K03_COLLAB-IT_CTRL_013.2598.2598.2	2	9.63	86.8	6130000	-1	0	0	0	0		342	(K)	YVAGSAGAGSGSLFVANHAY	(-)		16.14	950.13	1898.9	0.3496	184.1	P07764	Fructose-bisphosphate aldolase
706	17K03_COLLAB-IT_CTRL_021.4140.4140.0	2	9.61	75.1	4930000	-1	0	0	0	0		450	(R)	LGANSLLDLVVFGR	(A)		25.43	737.94	1473.84	1.0303	698.6	Q94523	Succinate dehydrogenase [ubiquinone] flavoprotein subunit, mitochondrial
712	17K03_COLLAB-IT_CTRL_012.2192.2192.0	4	9.59	63.6	5660000	-1	2	0	0	0		2211	(K)	LQESADGGGAGGLGVGDLKYHK	(K)		13.51	532.5	2129.06	-2.084	-979.8	Q70PP2	Serine/threonine-protein kinase Smg1
716	17K03_COLLAB-IT_CTRL_023.2883.2883.0	4	9.58	84	20500000	-1	1	0	0	0		205	(K)	SSSSSSDSDSDSEGEYLTVLRK	(K)		17.7	584.2	2336.04	-2.259	-968	Q9VJ62	H/ACA ribonucleoprotein complex non-core subunit NAF1
720	17K03_COLLAB-IT_CTRL_013.3235.3235.0	2	9.56	77.9	7840000	-1	0	0	0	0		365	(R)	AIAELGIYPAVDPLDSTSR	(I)		20.23	995.53	1988.03	2.0192	1014.7	Q05825	ATP synthase subunit beta, mitochondrial
724	17K03_COLLAB-IT_CTRL_032.2364.2364.0	2	9.56	64.4	7860000	-1	1	0	0	0		118	(R)	TVLTIQEPAVAK	(V)		14.55	635.65	1269.74	0.5514	434.1	Q9VV36	Retinin
726	17K03_COLLAB-IT_CTRL_011.2408.2408.0	3	9.55	74.2	8310000	-1	0	0	0	0		39	(R)	NNQSNNNNCNNNPR	(A)	C:Carbamidomethylation,	14.93	558.75	1673.68	0.5561	332.2	P13468	DNA-binding protein K10
727	17K03_COLLAB-IT_CTRL_011.2584.2584.0	3	9.55	86.3	14200000	-1	0	0	0	0		329	(K)	SVIHDIVLVGGSTR	(I)		16.04	485.58	1452.82	1.9085	1312	P11147	Heat shock 70 kDa protein cognate 4
728	17K03_COLLAB-IT_CTRL_011.2920.2920.0	5	9.55	85.2	9500000	-1	0	0	0	0		820	(K)	TSSSSSHSNSQNSQSSSSQSSQASQSEAQR	(Q)		18.17	615.16	3073.29	-1.5212	-495.2	Q9V3R1	Accessory gland protein Acp36DE
735	17K03_COLLAB-IT_CTRL_013.2166.2166.0	5	9.52	64.7	8260000	-1	1	0	0	0		94	(K)	ATLQIGNVMPLSQMPEGTIICNLEEK	(T)	C:Carbamidomethylation,	13.42	577.94	2886.44	-0.7701	-266.9	Q9V3G1	60S ribosomal protein L8
740	17K03_COLLAB-IT_CTRL_011.2273.2273.0	3	9.51	85.4	23600000	-1	1	0	0	0		722	(K)	IWVFQLSTSINITEK	(G)		14.16	594.27	1778.97	1.8267	1025.8	O61643	Inhibin beta chain
746	17K03_COLLAB-IT_CTRL_032.2433.2433.0	3	9.5	87	32100000	-1	3	0	0	0		287	(K)	ATAKLYAIKILK	(K)		14.97	445.18	1332.86	0.6641	498	Q8INB9	RAC serine/threonine-protein kinase
748	17K03_COLLAB-IT_CTRL_033.3166.3166.0	5	9.5	76.6	15200000	-1	2	0	0	0		188	(R)	TPQTSRASSAQQQPQISTTPNSVAAFFGNMIPPKVEVK	(L)		19.52	809.19	4043.07	-1.1446	-283.2	Q9VVI2	Enhancer of mRNA-decapping protein 3
754	17K03_COLLAB-IT_CTRL_021.1729.1729.0	4	9.47	61.9	13900000	-1	1	0	0	0		854	(K)	RLAKAAACLQYAQR	(L)	C:Carbamidomethylation,	10.65	405.33	1619.88	-1.5817	-977.4	Q7K4B6	Transmembrane and TPR repeat-containing protein CG4050
756	17K03_COLLAB-IT_CTRL_032.2909.2909.0	4	9.47	71.2	16700000	-1	0	0	0	0		41	(K)	LRSNPENNVGLMTLSNTVEVLATLTSDAGR	(I)		17.91	793.45	3172.63	-1.8485	-583	P55035	26S proteasome non-ATPase regulatory subunit 4
758	17K03_COLLAB-IT_CTRL_022.3728.3728.0	4	9.46	73.7	28800000	-1	2	0	0	0		311	(R)	SSVTQSIKNIPSAGILKSLAYSYR	(K)		22.93	646.76	2583.41	0.6041	233.8	Q8INF2	Phosphatidate cytidylyltransferase, mitochondrial
760	17K03_COLLAB-IT_CTRL_031.1940.1940.0	3	9.46	84.1	3020000	-1	0	0	0	0		12	(R)	TYSSRPVTTSYAVTTPR	(L)		11.95	630.16	1886.96	1.5048	796.8	C0HK95	Protein anoxia up-regulated
762	17K03_COLLAB-IT_CTRL_032.2044.2051.0	3	9.45	62.2	4990000	-1	2	0	0	0		143	(K)	KVHVIFSYK	(G)		12.52	374.35	1120.65	0.3841	342.6	P29413	Calreticulin
766	17K03_COLLAB-IT_CTRL_012.1936.1936.0	3	9.43	67.2	20400000	-1	1	0	0	0		97	(K)	IQSRGQTFIEIQTGK	(Y)		11.87	569.66	1705.92	1.0423	610.6	P10394	Retrovirus-related Pol polyprotein from transposon 412
768	17K03_COLLAB-IT_CTRL_032.2381.2381.0	5	9.43	71.5	9360000	-1	1	0	0	0		426	(R)	SADEAHERWQHKQPLLFTYTDDGR	(H)		14.64	580.43	2900.37	-2.2501	-776.4	P07713	Protein decapentaplegic
774	17K03_COLLAB-IT_CTRL_021.3097.3097.0	5	9.41	77.8	16200000	-1	1	0	0	0		72	(K)	LLHSLPAEHGGGAMAPPSSGGTVCAGADMVK	(L)	C:Carbamidomethylation,	18.83	596.29	2975.42	2.0037	673	P50535	Protein male-specific lethal-1
775	17K03_COLLAB-IT_CTRL_021.2551.2557.0	2	9.4	74.3	43300000	-1	0	0	0	0		1197	(R)	EVASSVVER	(G)		15.7	488.77	975.511	1.0222	1046.7	P25455	1-phosphatidylinositol 4,5-bisphosphate phosphodiesterase classes I and II
776	17K03_COLLAB-IT_CTRL_033.4097.4097.0	2	9.4	70.6	2330000	-1	0	0	0	0		450	(R)	LGANSLLDLVVFGR	(A)		25.47	737.44	1473.84	0.0303	20.6	Q94523	Succinate dehydrogenase [ubiquinone] flavoprotein subunit, mitochondrial
778	17K03_COLLAB-IT_CTRL_032.3587.3587.0	4	9.39	60.9	10300000	-1	0	0	0	0		1	(-)	MLNNYNSLAQPMWQNGPAPGEFYNFTGGQTPVQQLPR	(E)		22.28	1042.45	4165.97	0.8134	195.2	Q9VNA5	Proteasome subunit beta type-4
781	17K03_COLLAB-IT_CTRL_031.2172.2172.0	5	9.38	62	13100000	-1	1	0	0	0		2649	(R)	QLGQEIENLKAQVEAAR	(Q)		13.42	380.11	1897.01	-0.4929	-259.9	Q00174	Laminin subunit alpha
782	17K03_COLLAB-IT_CTRL_011.2870.2876.0	4	9.37	68.7	10900000	-1	1	0	0	0		577	(R)	CVDATKVWYEWQVVNSPDDWEHHNTR	(G)	C:Carbamidomethylation,	17.86	818.52	3271.47	-0.4069	-124.4	Q9U6Y9	Protein arginine N-methyltransferase 5
783	17K03_COLLAB-IT_CTRL_012.2710.2710.0	2	9.37	69.3	13500000	-1	1	0	0	0		2323	(K)	HIIYIVGDFSK	(Q)		16.76	646.39	1291.7	0.0682	52.8	Q9V496	Apolipophorins
784	17K03_COLLAB-IT_CTRL_013.2330.2330.0	4	9.37	68.1	7420000	-1	0	0	0	0		855	(R)	IIENVVNTRYHTNPQVRAR	(L)		14.46	571.36	2280.23	2.1862	957.8	P42787	Carboxypeptidase D
785	17K03_COLLAB-IT_CTRL_012.2625.2625.0	5	9.37	76.2	12000000	-1	1	0	0	0		571	(R)	QRCSSQISDGETDTDTTASSLLESQDK	(G)	C:Carbamidomethylation,	16.22	593.07	2959.31	2.014	680.1	Q24558	Exonuclease 1
786	17K03_COLLAB-IT_CTRL_021.3194.3194.0	3	9.37	65.6	43500000	-1	1	0	0	0		155	(K)	HTGSGILSMANAGANTNGSQFFICTVK	(T)	C:Carbamidomethylation,	19.43	929.03	2783.32	1.7515	628.9	P25007	Peptidyl-prolyl cis-trans isomerase
788	17K03_COLLAB-IT_CTRL_032.2560.2560.0	2	9.37	71.2	10200000	-1	0	0	0	0		31	(R)	SNSLDNVEQPSNWVNPR	(E)		15.73	978.4	1955.92	-0.1279	-65.4	P02844	Vitellogenin-2
799	17K03_COLLAB-IT_CTRL_021.2778.2778.0	4	9.32	73.8	17800000	-1	0	0	0	0		455	(R)	LPRYFPLTTSSSILFHLQR	(H)		16.95	569.72	2276.26	-0.3968	-174.4	Q9VEX5	Protein asunder
803	17K03_COLLAB-IT_CTRL_021.3599.3599.0	4	9.31	73.6	22000000	-1	2	0	0	0		1804	(R)	ITDDQLKILRAHFDINNSPSEESIMEMSQK	(A)		22.02	872.96	3489.7	-0.8807	-252.4	P28167	Zinc finger protein 2
807	17K03_COLLAB-IT_CTRL_011.4072.4072.0	4	9.29	76.6	3810000	-1	2	0	0	0		6538	(R)	ITEKLRPRQCVPEEPTVLECK	(V)	C:Carbamidomethylation,	25.57	646.86	2582.34	2.0753	803	Q9I7U4	Titin
810	17K03_COLLAB-IT_CTRL_021.1965.1965.0	3	9.28	77.4	10500000	-1	2	0	0	0		305	(R)	LVYRSKVAALLLEK	(H)		12.16	535.71	1602.99	2.1213	1321.6	Q9VCZ3	Octopamine receptor beta-1R
814	17K03_COLLAB-IT_CTRL_023.4075.4075.0	5	9.27	86.3	9780000	-1	1	0	0	0		68	(K)	HTGSPVYGIYALRDAVFFVRDPELIK	(L)		25.21	593.79	2963.58	1.3431	453	Q9V6H1	Probable cytochrome P450 9h1
819	17K03_COLLAB-IT_CTRL_022.2758.2758.0	2	9.26	74.6	13300000	-1	1	0	0	0		12	(K)	TITLEVEPSDTIENVK	(A)		16.9	894.53	1787.93	0.1254	70.1	P18101	Ubiquitin-60S ribosomal protein L40
820	17K03_COLLAB-IT_CTRL_033.3076.3076.0	4	9.26	65.1	8830000	-1	2	0	0	0		220	(R)	GGGGGGSQDLPMRPVDFSNLAPFKK	(N)		18.92	634.07	2532.27	0.9918	391.5	P19109	ATP-dependent RNA helicase p62
822	17K03_COLLAB-IT_CTRL_011.3367.3367.0	2	9.25	71.7	6550000	-1	0	0	0	0		83	(R)	VYYLSLEYYMGR	(S)		21.11	778.84	1556.74	-0.0727	-46.7	Q9XTL9	Glycogen phosphorylase
824	17K03_COLLAB-IT_CTRL_022.2972.2972.0	4	9.23	77.5	35300000	-1	0	0	0	0		3898	(R)	EGLLANPTPVEGLSAEQIESVNR	(L)		18.16	606.92	2423.24	1.4169	584.4	P37276	Dynein heavy chain, cytoplasmic
825	17K03_COLLAB-IT_CTRL_022.2322.2359.0	4	9.23	80.2	34200000	-1	3	0	0	0		1210	(R)	KVKSMGGGAGAGDVFPDPDGEPVEFK	(I)		14.33	648.48	2591.24	-0.3465	-133.7	P15348	DNA topoisomerase 2
826	17K03_COLLAB-IT_CTRL_023.2289.2289.0	2	9.23	76.6	7630000	-1	0	0	0	0		301	(R)	TYYGVPQWHR	(E)		14.06	654.81	1306.63	1.98	1513	Q24388	Larval serum protein 2
835	17K03_COLLAB-IT_CTRL_033.1614.1628.0	4	9.22	70.2	4510000	-1	2	0	0	0		1303	(K)	QDQKFLSILTAPGGGTK	(D)		9.74	440.97	1760.95	-0.096	-54.5	P98081	Protein disabled
841	17K03_COLLAB-IT_CTRL_032.3022.3022.0	2	9.21	68.8	19800000	-1	0	0	0	0		307	(K)	LISWYDNEFGYSNR	(V)		18.61	882.99	1763.8	1.1703	663.1	P07486	Glyceraldehyde-3-phosphate dehydrogenase 1
846	17K03_COLLAB-IT_CTRL_032.1757.1757.0	4	9.2	80.3	4980000	-1	0	0	0	0		213	(K)	LPYHMRLEHALMSFAIRR	(S)		10.7	561.35	2241.19	1.1886	530.1	Q01083	Protein spitz
849	17K03_COLLAB-IT_CTRL_013.2575.2575.0	4	9.19	77.4	4500000	-1	1	0	0	0		76	(K)	HEEPGAEAGGGGQGRAAAGATSTSK	(S)		16	564.62	2254.04	1.4139	626.9	Q7YZH1	PHD finger protein rhinoceros
851	17K03_COLLAB-IT_CTRL_013.2747.2757.0	5	9.19	69.7	210000000	-1	2	0	0	0		16	(R)	LPPQQIEKNLIDLIDLAPDLCEDLLSSVDQPLK	(I)	C:Carbamidomethylation,	17.09	749.05	3742.98	-1.7614	-470.8	P48603	F-actin-capping protein subunit beta
857	17K03_COLLAB-IT_CTRL_012.3060.3060.2	2	9.17	96.4	2970000	-1	0	0	0	0		26	(R)	YVIFYIR	(D)		18.97	487.85	973.551	1.1422	1171.8	P45594	Cofilin/actin-depolymerizing factor homolog
861	17K03_COLLAB-IT_CTRL_031.1777.1783.0	4	9.17	64.2	30000000	-1	1	0	0	0		341	(R)	SADIQIDIAYYTVLTEVMMLGK	(D)		10.91	619.39	2474.26	0.2825	114.1	Q9VCU7	Protein vreteno
864	17K03_COLLAB-IT_CTRL_011.3133.3133.0	5	9.16	68.2	13500000	-1	1	0	0	0		174	(K)	VDMQGQIVEQGTTNFGGNKSHFVLHSVVHAARPDIR	(C)		19.55	789.42	3944.99	-1.9228	-487.6	Q02645	Protein hu-li tai shao
866	17K03_COLLAB-IT_CTRL_032.2017.2017.0	4	9.16	83.8	5020000	-1	1	0	0	0		484	(K)	YFTPAPETNGYTDPFQGEARPFSHK	(S)		12.36	714.63	2857.32	-1.8235	-638.6	Q95RR8	PAN2-PAN3 deadenylation complex subunit PAN3
871	17K03_COLLAB-IT_CTRL_033.3050.3050.0	3	9.14	68.4	6930000	-1	1	0	0	0		519	(K)	SFDQGWSEYFGGQHLYQK	(L)		18.75	726.98	2176.97	1.9532	896.4	P18932	NADH-ubiquinone oxidoreductase chain 5
872	17K03_COLLAB-IT_CTRL_032.1541.1559.0	2	9.14	71.7	14900000	-1	0	0	0	0		39	(K)	TAVAPIER	(V)		9.35	428.83	856.489	0.164	191.5	Q26365	ADP,ATP carrier protein
873	17K03_COLLAB-IT_CTRL_022.4177.4177.0	3	9.13	66.6	4170000	-1	1	0	0	0		532	(R)	VYGLHYIGPVAGEVIQGFAAALK	(S)		25.76	792.46	2373.3	2.0689	871	P91938	Thioredoxin reductase 1, mitochondrial
877	17K03_COLLAB-IT_CTRL_032.3505.3513.0	5	9.12	61.2	20700000	-1	1	0	0	0		948	(R)	VPSLSDGEWGEGSDSAQDYHQGKYGGPYDFSYNNNSR	(L)		21.75	817.43	4083.73	-0.6079	-148.9	P20482	Segmentation protein cap'n'collar
879	17K03_COLLAB-IT_CTRL_011.4353.4353.0	3	9.11	81.8	2310000	-1	1	0	0	0		62	(R)	RPLILQLINGVTEYGEFLHIK	(G)		27.34	818.9	2453.39	1.294	527.1	P27619	Dynamin
883	17K03_COLLAB-IT_CTRL_011.3726.3726.0	3	9.1	93.2	6950000	-1	1	0	0	0		227	(K)	TLIDALDAILPPARPTDK	(A)		23.4	641.4	1920.08	2.1054	1095.3	P08736	Elongation factor 1-alpha 1
885	17K03_COLLAB-IT_CTRL_022.2019.2019.0	5	9.1	69.3	6540000	-1	1	0	0	0		39	(K)	YLRHTNRFTLSIGDQNSPLFHNEALK	(R)		12.38	615.12	3071.58	-0.0101	-3.3	Q7JXV9	Vacuolar protein-sorting-associated protein 25
891	17K03_COLLAB-IT_CTRL_021.2838.2838.0	5	9.08	89.1	20000000	-1	0	0	0	0		2483	(R)	AMDQFLAFLSETETLCENAESDIER	(N)	C:Carbamidomethylation,	17.28	584.32	2919.3	-1.7314	-593.4	Q9VDW6	Dystrophin, isoforms A/C/F/G/H
893	17K03_COLLAB-IT_CTRL_022.1685.1696.0	5	9.08	81.8	2800000	-1	1	0	0	0		547	(R)	TITAQLLSGSSSGLRPEEK	(R)		10.29	395.95	1974.05	1.6707	845.6	Q24167	Protein similar
904	17K03_COLLAB-IT_CTRL_012.2100.2100.0	5	9.05	67.4	5980000	-1	3	0	0	0		328	(K)	DAIASIKINGKCDQVMAQLMHLLHIPVPVYTK	(E)	C:Carbamidomethylation,	12.9	721.35	3603.92	-1.2003	-333.2	Q9VAQ1	NAD-dependent protein deacetylase Sirt7
905	17K03_COLLAB-IT_CTRL_021.4404.4404.0	5	9.05	76.8	10400000	-1	1	0	0	0		1461	(R)	QAWLSVDGKFNITGRSPGSGSR	(M)		27.09	464.55	2320.18	-1.4584	-629	A0A1F4	Protein eyes shut
907	17K03_COLLAB-IT_CTRL_011.3773.3773.0	2	9.04	84.1	5590000	-1	1	0	0	0		108	(R)	GLFNFFYYAK	(D)		23.69	635.88	1269.63	1.1225	883.3	P11995	Larval serum protein 1 alpha chain
908	17K03_COLLAB-IT_CTRL_022.2586.2596.0	5	9.04	66.7	34800000	-1	0	0	0	0		882	(K)	NSFGIDIVNAPPLHSSSNGQVER	(F)		15.87	488.8	2438.21	1.765	723.4	P10401	Retrovirus-related Pol polyprotein from transposon gypsy
911	17K03_COLLAB-IT_CTRL_012.2487.2487.0	5	9.03	63.5	5820000	-1	1	0	0	0		526	(R)	QLTCQVNENDTAADLTSELVRLGFVHLDDQDK	(I)	C:Carbamidomethylation,	15.36	729.38	3644.75	-1.8788	-515.7	Q9Y0Y6	Nuclear receptor-binding protein homolog
913	17K03_COLLAB-IT_CTRL_022.3660.3660.0	5	9.03	79.9	15600000	-1	2	0	0	0		426	(R)	ISMCHTSTELSEAIWFEILAESARKAAPHFEK	(I)	C:Carbamidomethylation,	22.51	739.09	3689.81	1.6118	436.6	O46080	Protein SMG9
914	17K03_COLLAB-IT_CTRL_023.2806.2806.0	4	9.03	77	18400000	-1	1	0	0	0		366	(R)	LATSASNSACSSSSSSTSSSSNSSK	(S)	C:Carbamidomethylation,	17.24	593.48	2369	1.8977	800.4	Q9U3V5	Protein tiptop
916	17K03_COLLAB-IT_CTRL_023.3488.3488.0	4	9.03	78.1	10400000	-1	1	0	0	0		1446	(K)	VRPSEASKFRTHVDAVGNITSLLLSLSER	(L)		21.5	796.91	3182.73	1.8901	593.5	A1Z9P3	Protein Shroom
917	17K03_COLLAB-IT_CTRL_013.2685.2685.0	5	9.02	70	13600000	-1	1	0	0	0		3	(R)	LELLVVLLVGLAALAPSGSTCCKTEPPR	(C)	C:Carbamidomethylation,	16.69	593.71	2964.63	-0.1052	-35.5	Q00725	Salivary glue protein Sgs-4
919	17K03_COLLAB-IT_CTRL_013.1815.1821.0	4	9.02	71.1	10300000	-1	0	0	0	0		263	(K)	NAAILAAGGNPNALNYSPR	(S)		11.2	471.97	1883.97	0.8859	470	A1Z9R4	Zinc finger protein 423 homolog
924	17K03_COLLAB-IT_CTRL_023.2093.2093.2	2	9.01	72.3	8350000	-1	0	0	0	0		339	(K)	SGQVVPGYGHAVLR	(K)		12.82	720.39	1439.78	-0.0026	-1.8	Q9W401	Probable citrate synthase, mitochondrial
926	17K03_COLLAB-IT_CTRL_033.3099.3105.0	4	9.01	76	11100000	-1	3	0	0	0		43	(R)	KHEAIEVVETPILEKETSDVK	(E)		19.1	599.35	2394.28	0.1019	42.6	P26802	Probable ATP-dependent RNA helicase Dbp73D
930	17K03_COLLAB-IT_CTRL_033.4007.4013.0	4	9	66.1	6630000	-1	1	0	0	0		257	(R)	IQRPGSGTDELDANAELLDYQPQNLQFAK	(V)		24.9	808.03	3231.59	-2.4935	-772.2	Q9VHN9	Hermansky-Pudlak syndrome 5 protein homolog
934	17K03_COLLAB-IT_CTRL_022.1771.1771.0	5	8.99	64.2	2560000	-1	0	0	0	0		266	(R)	LETSPTAARSLGATSSVGAGVPAGASSNSGGR	(H)		10.82	575.48	2873.43	-0.0639	-22.2	Q9U3V5	Protein tiptop
935	17K03_COLLAB-IT_CTRL_023.1824.1829.0	4	8.99	73.4	9510000	-1	0	0	0	0		263	(K)	NAAILAAGGNPNALNYSPR	(S)		11.14	471.94	1883.97	0.7659	406.4	A1Z9R4	Zinc finger protein 423 homolog
938	17K03_COLLAB-IT_CTRL_031.3716.3716.0	4	8.99	75.7	17700000	-1	1	0	0	0		1337	(K)	SSMLSILSGKFWELFQSLLALNEFNDVVSNCQEAVHR	(I)	C:Carbamidomethylation,	23.11	1068.13	4269.11	0.3874	90.7	Q9W1R5	Protein virilizer
939	17K03_COLLAB-IT_CTRL_011.3842.3842.0	2	8.98	61.6	5220000	-1	1	0	0	0		146	(K)	FSAENSKPFLTYSYCWPF	(-)	C:Carbamidomethylation,	24.12	1122.78	2244.01	0.5421	241.5	P07701	Salivary glue protein Sgs-5
943	17K03_COLLAB-IT_CTRL_031.1934.1934.3	3	8.98	63.8	8160000	-1	0	0	0	0		1712	(K)	LCRSCGNVVHATGLRVPR	(H)	C:Carbamidomethylation,	11.91	684.98	2052.07	0.8553	416.6	Q8IRW8	Histone-lysine N-methyltransferase trr
945	17K03_COLLAB-IT_CTRL_011.4108.4108.0	5	8.97	67.2	10400000	-1	2	0	0	0		5	(K)	QKISVEPLLLVAILIGVLVAATHAQDQK	(S)		25.8	594.1	2967.76	-1.2896	-434.7	P49415	Syndecan
950	17K03_COLLAB-IT_CTRL_022.3465.3465.0	2	8.96	77.7	15000000	-1	1	0	0	0		103	(K)	GMALNLEPDNVGVVVFGNDK	(L)		21.25	1045.01	2088.04	0.9697	464.2	P35381	ATP synthase subunit alpha, mitochondrial
957	17K03_COLLAB-IT_CTRL_032.4300.4300.0	4	8.95	78.7	3960000	-1	1	0	0	0		52	(K)	HYADLSARPFFPGLVNYMNSGPVVPMVWEGLNVVK	(T)		26.77	977.22	3903.97	1.8869	483.1	P08879	Nucleoside diphosphate kinase
959	17K03_COLLAB-IT_CTRL_032.3089.3089.0	3	8.95	61.4	14700000	-1	1	0	0	0		362	(R)	RSHGGSSSSSATGTNESSALLDCNTSK	(G)	C:Carbamidomethylation,	19.08	900.07	2698.2	-0.0015	-0.5	Q03445	Glutamate receptor 1
[truncated: 380 more rows]

## Sheet: USP8_peptide liste
#	filename	z	score	SPI (%)	total Intensity	score VML	# Possible VM sites_K	# Actual VM Sites_k	# Localized VM sites_k	# Ambiguous VM sites_k	variable Sites	Start AA	previous aa	sequence	next aa	modifications	RT (Min)	parent m/z	matched parent mass	delta parent mass	delta parent mass ppm	# accession	entry_name
[truncated: 1,892 more rows]
