# Supplementary material for: USP8 Down-Regulation Promotes Parkin-Independent Mitophagy in the Drosophila Brain and in Human Neurons
Source: Cells. 2023 Apr 13;12(8):1143. doi: 10.3390/cells12081143 (PMC10136645; doi:10.3390/cells12081143)
Supplement: Supplementary file 1 [file cells-12-01143-s001.zip › Supplementary excel file S3.xlsx]

## Sheet: Sheet1
accession number	Protein name	Species	Gene Name
Q9VF30	rec	Drosophila melanogaster	recombination-defective
P22807	slou	Drosophila melanogaster	slouch
P49846	Taf5	Drosophila melanogaster	TBP-associated factor 5
P27398	sol	Drosophila melanogaster	small optic lobes
Q9VCU9	Dcr-1	Drosophila melanogaster	Dicer-1
Q9VRX6	zpg	Drosophila melanogaster	zero population growth
P25123	Rdl	Drosophila melanogaster	Resistant to dieldrin
Q9VFI9	Pde6	Drosophila melanogaster	Phosphodiesterase 6
Q9VMJ7	lid	Drosophila melanogaster	little imaginal discs
Q9VLT5	poe	Drosophila melanogaster	purity of essence
Q9W1B0	gek	Drosophila melanogaster	genghis khan
Q9VTL1	PCID2	Drosophila melanogaster	PCI domain-containing protein 2
E1JH25	tea	Drosophila melanogaster	telomere ends associated
Q9XYP7	Grip84	Drosophila melanogaster	Gamma-tubulin ring protein 84
O46037	Vinc	Drosophila melanogaster	Vinculin
Q8T4F7	ena	Drosophila melanogaster	enabled
P29746	bnb	Drosophila melanogaster	bangles and beads
F0JAI6	Kebab	Drosophila melanogaster	Kinetochore and EB1 associated basic protein
P22769	Prosalpha4	Drosophila melanogaster	Proteasome alpha4 subunit
P29310	14-3-3zeta	Drosophila melanogaster	14-3-3zeta
Q94890	H15	Drosophila melanogaster	H15
Q24498	RyR	Drosophila melanogaster	Ryanodine receptor
P54351	Nsf2	Drosophila melanogaster	N-ethylmaleimide-sensitive factor 2
Q9VVI3	Nedd4	Drosophila melanogaster	Nedd4
P40421	rdgC	Drosophila melanogaster	retinal degeneration C
Q9Y103	sip1	Drosophila melanogaster	septin interacting protein 1
P29845	Hsc70-5	Drosophila melanogaster	Heat shock protein cognate 5
Q9VGP6	mgr	Drosophila melanogaster	merry-go-round
P61849	Ms	Drosophila melanogaster	Myosuppressin
Q9VWE6	Elys	Drosophila melanogaster	None
P91927	Letm1	Drosophila melanogaster	Leucine zipper and EF-hand containing transmembrane protein 1
Q9VL32	Sur	Drosophila melanogaster	Sulfonylurea receptor
Q9V784	CG7639	Drosophila melanogaster	None
Q9VZF4	ago	Drosophila melanogaster	archipelago
Q8SY41	rudhira	Drosophila melanogaster	rudhira
Q9VG17	Cyp304a1	Drosophila melanogaster	Cyp304a1
O77086	C3G	Drosophila melanogaster	C3G guanyl-nucleotide exchange factor
Q9VD44	Gld2	Drosophila melanogaster	GLD2 poly(A) polymerase
P26686	B52	Drosophila melanogaster	B52
P45843	st	Drosophila melanogaster	scarlet
Q9V9S7	RhoGAP100F	Drosophila melanogaster	Rho GTPase activating protein at 100F
Q9VZX1	spz5	Drosophila melanogaster	spatzle 5
Q24167	sima	Drosophila melanogaster	similar
P32870	rut	Drosophila melanogaster	rutabaga
Q9VCX1	loco	Drosophila melanogaster	locomotion defects
Q9V4P1	scra	Drosophila melanogaster	scraps
Q9V877	sub	Drosophila melanogaster	subito
Q8MRC9	Pgant9	Drosophila melanogaster	Polypeptide N-Acetylgalactosaminyltransferase 9
Q9VI25	Neurochondrin	Drosophila melanogaster	Neurochondrin
Q94526	Ork1	Drosophila melanogaster	Open rectifier K[+] channel 1
Q9VIL0	brun	Drosophila melanogaster	brunelleschi
P45884	AttA	Drosophila melanogaster	Attacin-A
Q9VZ08	Gapvd1	Drosophila melanogaster	GTPase activating protein and VPS9 domains 1
P08761	MsrA	Drosophila melanogaster	Methionine sulfoxide reductase A
A1Z7Z9	dila	Drosophila melanogaster	dilatory
Q0KIC3	smash	Drosophila melanogaster	smallish
O46080	CG3857	Drosophila melanogaster	None
P81928	140up	Drosophila melanogaster	upstream of RpII140
Q05337	Galphaf	Drosophila melanogaster	G protein alpha f subunit
P35820	Psc	Drosophila melanogaster	Posterior sex combs
Q9VE00	Cyp12a4	Drosophila melanogaster	Cyp12a4
P20028	RpI135	Drosophila melanogaster	RNA polymerase I 135kD subunit
Q9W1X4	Nup214	Drosophila melanogaster	Nucleoporin 214kD
Q9W1V1	Art7	Drosophila melanogaster	Arginine methyltransferase 7
Q9W062	Mfap1	Drosophila melanogaster	Microfibril-associated protein 1
Q8MT36	NSD	Drosophila melanogaster	Nuclear receptor binding SET domain protein
P52029	Pgi	Drosophila melanogaster	Phosphoglucose isomerase
P27619	shi	Drosophila melanogaster	shibire
O18405	Surf4	Drosophila melanogaster	Surfeit 4
Q9V407	Axn	Drosophila melanogaster	Axin
Q9W3Y5	CG14443	Drosophila melanogaster	None
P04146	None	Drosophila melanogaster	None
Q05192	Hr39	Drosophila melanogaster	Hormone receptor-like in 39
Q24509	Syx5	Drosophila melanogaster	Syntaxin 5
Q9VI58	Tailor	Drosophila melanogaster	Tailor
Q9VN50	eIF3f1	Drosophila melanogaster	eukaryotic translation initiation factor 3 subunit f1
Q24523	bun	Drosophila melanogaster	bunched
Q9W0S9	DIP2	Drosophila melanogaster	DISCO Interacting Protein 2
P00967	Gart	Drosophila melanogaster	GART trifunctional enzyme
Q08473	sqd	Drosophila melanogaster	squid
Q9VH14	Timp	Drosophila melanogaster	Tissue inhibitor of metalloproteases
P49906	Taf11	Drosophila melanogaster	TBP-associated factor 11
Q9W4N2	CG6379	Drosophila melanogaster	None
Q24322	Sema1a	Drosophila melanogaster	Semaphorin 1a
Q9VFL5	MetRS-m	Drosophila melanogaster	Methionyl-tRNA synthetase, mitochondrial
Q70PP2	nonC	Drosophila melanogaster	no-on-and-no-off transient C
Q9W4S9	dnc	Drosophila melanogaster	dunce
Q9W2Q1	Rx	Drosophila melanogaster	Retinal Homeobox
Q9V7S5	Picot	Drosophila melanogaster	Picot
Q9VU95	CG8745	Drosophila melanogaster	None
Q9VGI8	Blm	Drosophila melanogaster	Bloom syndrome helicase
Q01989	jar	Drosophila melanogaster	jaguar
Q9VUY8	Strump	Drosophila melanogaster	Strumpellin
Q9W0P5	Gale	Drosophila melanogaster	UDP-galactose 4'-epimerase
Q9V411	Non1	Drosophila melanogaster	Novel nucleolar protein 1
Q9W3F7	Miga	Drosophila melanogaster	Mitoguardin
O18475	DNApol-theta	Drosophila melanogaster	DNA polymerase theta
Q9VM60	CG3430	Drosophila melanogaster	None
Q8IMU4	CG31115	Drosophila melanogaster	None
P12297	su(w[a])	Drosophila melanogaster	suppressor of white-apricot
P91943	pan	Drosophila melanogaster	pangolin
Q9VHH7	Ada	Drosophila melanogaster	Adenosine deaminase
Q07152	ras	Drosophila melanogaster	raspberry
Q9V3J1	VhaSFD	Drosophila melanogaster	Vacuolar H[+]-ATPase SFD subunit
O18404	scu	Drosophila melanogaster	scully
P33450	ft	Drosophila melanogaster	fat
O46036	CtBP	Drosophila melanogaster	C-terminal Binding Protein
P10333	Acp26Aa	Drosophila melanogaster	Accessory gland protein 26Aa
Q9VM33	mEFG1	Drosophila melanogaster	mitochondrial translation elongation factor G 1
Q9W484	CG4078	Drosophila melanogaster	None
P53501	Act57B	Drosophila melanogaster	Actin 57B
Q24459	Pcl	Drosophila melanogaster	Polycomblike
Q9W3M3	Ubr3	Drosophila melanogaster	Ubr3 ubiquitin ligase
Q9VP48	Rab26	Drosophila melanogaster	Rab26
P20482	cnc	Drosophila melanogaster	cap-n-collar
P12370	Pka-C1	Drosophila melanogaster	Protein kinase, cAMP-dependent, catalytic subunit 1
Q9VF08	blp	Drosophila melanogaster	black pearl
Q9VUR7	CG7650	Drosophila melanogaster	None
Q9XYZ5	pic	Drosophila melanogaster	piccolo
P25028	fs(1)Ya	Drosophila melanogaster	female sterile (1) Young arrest
P13395	alpha-Spec	Drosophila melanogaster	alpha Spectrin
P09180	RpL4	Drosophila melanogaster	Ribosomal protein L4
P10676	ninaC	Drosophila melanogaster	neither inactivation nor afterpotential C
Q9U6L4	tty	Drosophila melanogaster	tweety
Q9VTN3	Tim13	Drosophila melanogaster	Tim13
Q7YU81	chn	Drosophila melanogaster	charlatan
Q9VGB4	Cyp313a2	Drosophila melanogaster	Cyp313a2
Q9VHA0	Scm	Drosophila melanogaster	Sex comb on midleg
P39205	cin	Drosophila melanogaster	cinnamon
P29503	neur	Drosophila melanogaster	neuralized
Q9VU65	Poc1	Drosophila melanogaster	Proteome of centrioles 1
P25160	Arl1	Drosophila melanogaster	ADP ribosylation factor-like 1
P41126	RpL13	Drosophila melanogaster	Ribosomal protein L13
Q9VFB7	SIDL	Drosophila melanogaster	Shal Interactor of Di-Leucine Motif
Q9VMA7	Tango1	Drosophila melanogaster	Transport and Golgi organization 1
Q9VU84	Abp1	Drosophila melanogaster	Actin binding protein 1
Q9VSH4	Cpsf6	Drosophila melanogaster	Cleavage and polyadenylation specific factor 6
P04412	Egfr	Drosophila melanogaster	Epidermal growth factor receptor
Q7K2D2	DCTN2-p50	Drosophila melanogaster	Dynactin 2, p50 subunit
Q9VGY5	CG14683	Drosophila melanogaster	None
Q9NB71	hiw	Drosophila melanogaster	highwire
Q9VU87	Vps36	Drosophila melanogaster	Vacuolar protein sorting 36
P25992	yem	Drosophila melanogaster	yemanuclein
Q9VTK2	rt	Drosophila melanogaster	rotated abdomen
P54350	Wee1	Drosophila melanogaster	Wee1 kinase
P32029	fd96Cb	Drosophila melanogaster	forkhead domain 96Cb
Q9W1P7	Or59c	Drosophila melanogaster	Odorant receptor 59c
Q9VQ93	sau	Drosophila melanogaster	sauron
Q967D7	tutl	Drosophila melanogaster	turtle
Q24423	noc	Drosophila melanogaster	no ocelli
P34739	lds	Drosophila melanogaster	lodestar
Q9VUQ5		Drosophila melanogaster	Argonaute 2
Q9NHE5	Cadps	Drosophila melanogaster	Calcium-dependent secretion activator
Q04448	Nmdmc	Drosophila melanogaster	NAD-dependent methylenetetrahydrofolate dehydrogenase
Q24546	Syn	Drosophila melanogaster	Synapsin
Q9VGY6	Skeletor	Drosophila melanogaster	Skeletor
Q9V3S9	bgm	Drosophila melanogaster	bubblegum
P39769	ph-p	Drosophila melanogaster	polyhomeotic proximal
P17207	Jon99Ci	Drosophila melanogaster	Jonah 99Ci
Q9VFP1	Cyp6d5	Drosophila melanogaster	Cyp6d5
Q9VWQ2	S6KL	Drosophila melanogaster	S6 Kinase Like
A8JQ65	CG34384	Drosophila melanogaster	None
P48148	Rho1	Drosophila melanogaster	Rho1
Q24547	Syx1A	Drosophila melanogaster	Syntaxin 1A
P30974	TkR86C	Drosophila melanogaster	Tachykinin-like receptor at 86C
Q9VXN9	PGRP-LE	Drosophila melanogaster	Peptidoglycan recognition protein LE
Q23979	Myo61F	Drosophila melanogaster	Myosin 61F
Q9VXH9	SWIP	Drosophila melanogaster	Strumpellin and WASH-interacting protein
Q8SWR8	Atx2	Drosophila melanogaster	Ataxin-2
Q9VDD9	CG7009	Drosophila melanogaster	None
P09491	Tm2	Drosophila melanogaster	Tropomyosin 2
P19334	trp	Drosophila melanogaster	transient receptor potential
Q9VXG4	AnxB11	Drosophila melanogaster	Annexin B11
Q9VEJ2	l(3)07882	Drosophila melanogaster	lethal (3) 07882
Q9W265	T3dh	Drosophila melanogaster	Type III alcohol dehydrogenase
Q24270	Ca-alpha1D	Drosophila melanogaster	Ca[2+]-channel protein alpha[[1]] subunit D
P00522	Abl	Drosophila melanogaster	Abl tyrosine kinase
Q9V496	apolpp	Drosophila melanogaster	apolipophorin
Q9VJJ7	Trpgamma	Drosophila melanogaster	Transient receptor potential cation channel gamma
Q9V333	Kdm4A	Drosophila melanogaster	Lysine (K)-specific demethylase 4A
Q9VX25	CG8188	Drosophila melanogaster	None
O76464	NitFhit	Drosophila melanogaster	Nitrilase and fragile histidine triad fusion protein
Q7KUT2	Lon	Drosophila melanogaster	Lon protease
P48591	RnrL	Drosophila melanogaster	Ribonucleoside diphosphate reductase large subunit
Q9W1L5	Pal2	Drosophila melanogaster	Peptidyl-alpha-hydroxyglycine-alpha-amidating lyase 2
Q9V431	cass	Drosophila melanogaster	cassowary
Q9U4H5	amx	Drosophila melanogaster	almondex
Q23989	qua	Drosophila melanogaster	quail
Q9VP05	MED1	Drosophila melanogaster	Mediator complex subunit 1
Q24492	RpA-70	Drosophila melanogaster	Replication Protein A 70
Q9VRH6	waw	Drosophila melanogaster	waclaw
Q24152	Cks30A	Drosophila melanogaster	Cyclin-dependent kinase subunit 30A
Q76NQ1	rho-5	Drosophila melanogaster	rhomboid-5
Q9W0G7	msd1	Drosophila melanogaster	mitotic spindle density 1
Q9VXE5	mbt	Drosophila melanogaster	mushroom bodies tiny
P91928	Mitofilin	Drosophila melanogaster	Mitofilin
Q9W2M2	Treh	Drosophila melanogaster	Trehalase
P29742	Chc	Drosophila melanogaster	Clathrin heavy chain
Q9NBD7	chb	Drosophila melanogaster	chromosome bows
Q9VGZ0	Cyp12e1	Drosophila melanogaster	Cyp12e1
Q24568	NetB	Drosophila melanogaster	Netrin-B
A1Z9E2	mip120	Drosophila melanogaster	Myb-interacting protein 120
Q9XYU1	Mcm3	Drosophila melanogaster	Minichromosome maintenance 3
Q24572	Caf1-55	Drosophila melanogaster	Chromatin assembly factor 1, p55 subunit
Q9VS38	MED4	Drosophila melanogaster	Mediator complex subunit 4
Q6NP60	olf413	Drosophila melanogaster	olf413
Q23976	Irbp	Drosophila melanogaster	Inverted repeat-binding protein
Q07407	htl	Drosophila melanogaster	heartless
P10041	Dl	Drosophila melanogaster	Delta
Q9VJS8	elB	Drosophila melanogaster	elbow B
P23803	odd	Drosophila melanogaster	odd skipped
Q7JR71	Sod3	Drosophila melanogaster	Superoxide dismutase 3
P15330	dl	Drosophila melanogaster	dorsal
P83094	Stim	Drosophila melanogaster	Stromal interaction molecule
Q9VYA7	CG2691	Drosophila melanogaster	None
O77410	eIF3e	Drosophila melanogaster	eukaryotic translation initiation factor 3 subunit e
Q9VVR2	bora	Drosophila melanogaster	aurora borealis
P28167	zfh2	Drosophila melanogaster	Zn finger homeodomain 2
A8DYY5	CG34183	Drosophila melanogaster	None
P18173	Gld	Drosophila melanogaster	Glucose dehydrogenase
Q7K4W1	CG6550	Drosophila melanogaster	None
Q24472	Rbf	Drosophila melanogaster	Retinoblastoma-family protein
Q9VM21	gudu	Drosophila melanogaster	gudu
Q9VLN1	Wdr82	Drosophila melanogaster	WD repeat domain 82
Q27896	Trf	Drosophila melanogaster	TBP-related factor
Q9V3P6	Rpn2	Drosophila melanogaster	Regulatory particle non-ATPase 2
Q24563	Dop1R2	Drosophila melanogaster	Dopamine 1-like receptor 2
Q9VN12	CG1090	Drosophila melanogaster	None
Q6NN85	ssh	Drosophila melanogaster	slingshot
Q9W5D4	tw	Drosophila melanogaster	twisted
Q9VLR9	PGAP5	Drosophila melanogaster	Post-GPI attachment to proteins 5
Q9VMW9	Gmd	Drosophila melanogaster	GDP-mannose 4,6-dehydratase
Q9NIV1	PEK	Drosophila melanogaster	pancreatic eIF-2alpha kinase
Q6AWG9	CG5098	Drosophila melanogaster	None
Q9VRP9	Bre1	Drosophila melanogaster	Bre1
Q9I7K6	CG8223	Drosophila melanogaster	None
Q9W4S1	CG12206	Drosophila melanogaster	None
Q9W5U2	Cht10	Drosophila melanogaster	Chitinase 10
Q9VEC3	Arp5	Drosophila melanogaster	Actin-related protein 5
Q7JRJ1	Eaf	Drosophila melanogaster	ELL-associated factor
P51140	dsh	Drosophila melanogaster	dishevelled
Q9VSA4	CG7457	Drosophila melanogaster	None
Q9VVT5	Dysb	Drosophila melanogaster	Dysbindin
Q9V9Z9	CG1542	Drosophila melanogaster	None
Q9VKA5	Gr33a	Drosophila melanogaster	Gustatory receptor 33a
P08953	Tl	Drosophila melanogaster	Toll
Q9VYF2	CG15743	Drosophila melanogaster	None
Q9VSH2	Gr66a	Drosophila melanogaster	Gustatory receptor 66a
Q01637	r-l	Drosophila melanogaster	rudimentary-like
Q09103	rdgA	Drosophila melanogaster	retinal degeneration A
Q9VAW5	larp	Drosophila melanogaster	La related protein
Q9VQ37	Rim2	Drosophila melanogaster	Replication in mitochondria 2
P25455	Plc21C	Drosophila melanogaster	Phospholipase C at 21C
A8DYY6	Schip1	Drosophila melanogaster	Schwannomin interacting protein 1
Q8INK6	PGRP-LB	Drosophila melanogaster	Peptidoglycan recognition protein LB
Q7KT91	CG33090	Drosophila melanogaster	None
O15943	CadN	Drosophila melanogaster	Cadherin-N
Q6J5K9	armi	Drosophila melanogaster	armitage
Q9VNT5	Trxr-2	Drosophila melanogaster	thioredoxin reductase 2
Q27934	phyl	Drosophila melanogaster	phyllopod
P46461	comt	Drosophila melanogaster	comatose
Q9VQ79	AIF	Drosophila melanogaster	Apoptosis inducing factor
P98163	yl	Drosophila melanogaster	yolkless
Q8MPP3	Mmp2	Drosophila melanogaster	Matrix metalloproteinase 2
P42787	svr	Drosophila melanogaster	silver
Q02748	eIF4A	Drosophila melanogaster	eukaryotic translation initiation factor 4A
Q9VNB5	Orco	Drosophila melanogaster	Odorant receptor co-receptor
Q59DY6	lectin-37Da	Drosophila melanogaster	lectin-37Da
Q9Y169	sotv	Drosophila melanogaster	sister of tout-velu
Q9V9K7	Ars2	Drosophila melanogaster	Arsenic resistance protein 2
Q9U969	sws	Drosophila melanogaster	swiss cheese
O61307	Ten-m	Drosophila melanogaster	Tenascin major
Q9W130	Cyp9c1	Drosophila melanogaster	Cytochrome P450-9c1
A1Z713	Vps13	Drosophila melanogaster	Vacuolar protein sorting 13
Q9VTX8	CG10616	Drosophila melanogaster	None
Q7JW27	wash	Drosophila melanogaster	washout
Q9V4Z9	lin	Drosophila melanogaster	lines
Q9VHM2	CG8202	Drosophila melanogaster	None
P20354	Galphas	Drosophila melanogaster	G protein alpha s subunit
Q8MSU4	Sym	Drosophila melanogaster	Symplekin
Q9I7I0	CycB3	Drosophila melanogaster	Cyclin B3
Q9V5N8	stan	Drosophila melanogaster	starry night
Q9W2E1	stum	Drosophila melanogaster	stumble
Q9W3M2	CG15332	Drosophila melanogaster	None
Q9VLC0	scat	Drosophila melanogaster	scattered
P04197	Myb	Drosophila melanogaster	Myb oncogene-like
Q9VVG4	Sec3	Drosophila melanogaster	Secretory 3
A1Z6E0	gus	Drosophila melanogaster	gustavus
O76922	aub	Drosophila melanogaster	aubergine
Q9W0P8	MED14	Drosophila melanogaster	Mediator complex subunit 14
Q24312	ewg	Drosophila melanogaster	erect wing
Q03042	Pkg21D	Drosophila melanogaster	Protein kinase, cGMP-dependent at 21D
P16163	Uro	Drosophila melanogaster	Urate oxidase
Q9V4S8	CSN7	Drosophila melanogaster	COP9 signalosome subunit 7
Q9VEI3	sll	Drosophila melanogaster	slalom
P11995	Lsp1alpha	Drosophila melanogaster	Larval serum protein 1 alpha
Q9W197	cN-IIIB	Drosophila melanogaster	cytosolic 5'-nucleotidase IIIB
P49735	Mcm2	Drosophila melanogaster	Minichromosome maintenance 2
Q9VXA0	Nprl2	Drosophila melanogaster	Nitrogen permease regulator-like 2
P54399	Pdi	Drosophila melanogaster	Protein disulfide isomerase
Q95RJ9	ebi	Drosophila melanogaster	ebi
Q9VWE0	dome	Drosophila melanogaster	domeless
P04052	RpII215	Drosophila melanogaster	RNA polymerase II 215kD subunit
P45437	betaCOP	Drosophila melanogaster	Coat Protein (coatomer) beta
Q9W157	Brca2	Drosophila melanogaster	BRCA2, DNA repair associated
P25723	tld	Drosophila melanogaster	tolloid
Q9VAH9	IntS11	Drosophila melanogaster	Integrator 11
P22700	SERCA	Drosophila melanogaster	Sarco/endoplasmic reticulum Ca(2+)-ATPase
Q9VMA3	cup	Drosophila melanogaster	cup
Q7JWW5	CG8078	Drosophila melanogaster	None
Q9VEX0	Sulf1	Drosophila melanogaster	Sulfated
Q9W0R5	mthl10	Drosophila melanogaster	methuselah-like 10
Q07886	Dbp45A	Drosophila melanogaster	DEAD box protein 45A
Q9V3X4	Seipin	Drosophila melanogaster	Seipin
O61643	Actbeta	Drosophila melanogaster	Activin-beta
Q9V3L1	sfl	Drosophila melanogaster	sulfateless
A1ZAJ2	unc-104	Drosophila melanogaster	uncoordinated-104
Q02280	eag	Drosophila melanogaster	ether a go-go
P52304	polo	Drosophila melanogaster	polo
Q9NDJ2	dom	Drosophila melanogaster	domino
Q8T053	CG2678	Drosophila melanogaster	None
Q9W4M9	Nsun2	Drosophila melanogaster	NOP2-Sun domain family, member 2
Q24418	Nmdar1	Drosophila melanogaster	NMDA receptor 1
Q9W3E1	IntS4	Drosophila melanogaster	Integrator 4
P20009	Dll	Drosophila melanogaster	Distal-less
P30432	Fur2	Drosophila melanogaster	Furin 2
P41073	Pep	Drosophila melanogaster	Protein on ecdysone puffs
Q9V5M6	lola	Drosophila melanogaster	longitudinals lacking
Q960V3	milt	Drosophila melanogaster	milton
Q9W261	Rtf1	Drosophila melanogaster	Rtf1
Q9VDG2	Rlip	Drosophila melanogaster	Ral interacting protein
Q9V8I2	CG5189	Drosophila melanogaster	None
P49762	Doa	Drosophila melanogaster	Darkener of apricot
Q9VJB6	CadN2	Drosophila melanogaster	Cadherin-N2
P21519	mam	Drosophila melanogaster	mastermind
Q7KQZ4	lola	Drosophila melanogaster	longitudinals lacking
P22745	bam	Drosophila melanogaster	bag of marbles
P54385	Gdh	Drosophila melanogaster	Glutamate dehydrogenase
P15372	Arr1	Drosophila melanogaster	Arrestin 1
P54269	caup	Drosophila melanogaster	caupolican
Q9VAZ3	Or98a	Drosophila melanogaster	Odorant receptor 98a
P54398	Fbp2	Drosophila melanogaster	Fat body protein 2
Q9VYX1	e(y)2	Drosophila melanogaster	enhancer of yellow 2
Q9VYS4	wisp	Drosophila melanogaster	wispy
Q9VPT8	Clp	Drosophila melanogaster	Clipper
Q8T3L6	beg	Drosophila melanogaster	bad egg
Q9VH20	TAF1B	Drosophila melanogaster	TATA box-binding protein-associated factor RNA polymerase I subunit B
